# Supplementary material for: Germaborene reactivity study – addition of carbon nucleophiles, cycloaddition reactions, coordination chemistry
Source: Royal Society of Chemistry journal article supplement (doi:10.1039/d4sc03743j), 2024-01-01
Supplement: d4sc03743j1.pdf [file d4sc03743j1.pdf]

## Supporting Information

Christian Reik, Lukas W. Jenner, Hartmut Schubert, Klaus Eichele, Lars Wesemann

Institut für Anorganische Chemie, Auf der Morgenstelle 18, 72076 Tübingen, Germany, E-Mail:  
lars.wesemann@uni-tuebingen.de

## Content

|                                           |     |
|-------------------------------------------|-----|
| Experimental Section.....                 | 2   |
| Syntheses.....                            | 3   |
| Data of crystal structure analyses .....  | 13  |
| NMR spectroscopy.....                     | 17  |
| NMR spectra of compound <b>2</b> . .....  | 17  |
| NMR spectra of compound <b>3</b> . .....  | 21  |
| NMR spectra of compound <b>4</b> . .....  | 25  |
| NMR spectra of compound <b>5</b> . .....  | 30  |
| NMR spectra of compound <b>6</b> . .....  | 37  |
| NMR spectra of compound <b>7</b> . .....  | 45  |
| NMR spectra of compound <b>8</b> . .....  | 50  |
| NMR spectra of compound <b>9</b> . .....  | 55  |
| NMR spectra of compound <b>10</b> . ..... | 59  |
| NMR spectra of compound <b>12</b> . ..... | 67  |
| NMR spectra of compound <b>13</b> . ..... | 71  |
| NMR spectra of compound <b>14</b> . ..... | 75  |
| Quantum chemical calculations .....       | 79  |
| References .....                          | 119 |

## Experimental Section

**General procedures.** All manipulations were carried out under argon atmosphere using standard Schlenk techniques and gloveboxes. Benzene was dried with activated aluminium oxide, *n*-pentane and *n*-hexane were obtained from a MBraun solvent purification system (SPS). All other solvents (Et<sub>2</sub>O, THF, toluene, benzene-*d*<sub>6</sub>) were distilled from a sodium-potassium alloy and like the previous mentioned solvents subsequently degassed by three freeze–pump–thaw cycles. Germaborenes **1a**, **1b**, **1c**, <sup>Me</sup>NHC, sodium tetrakis[3,5-bis(trifluoromethyl)phenyl]borate (Na[BAr<sup>F</sup><sub>4</sub>]), Ag[Al(OtBu<sup>F</sup>)<sub>4</sub>] and [Cp\*Al]<sub>4</sub> were prepared according to a literature procedure (Ar<sup>F</sup> = 3,5-bis(trifluoromethyl)phenyl; tBu<sup>F</sup> = C{CF<sub>3</sub>})<sub>3</sub>).<sup>1-7</sup> Further chemicals were purchased commercially and used as received.

**Elemental analysis.** Elemental analysis was performed at the Institute of Inorganic Chemistry, University of Tübingen using an *elementar* vario MICRO Cube.

**NMR spectroscopy.** NMR spectra were recorded with either a Bruker Avance III HD 300 NanoBay spectrometer equipped with a 5 mm BBFO probe head and operating at 300.13 (<sup>1</sup>H), 96.29 (<sup>11</sup>B) and 57.23 MHz (<sup>77</sup>Se), a Bruker AVII+400 NMR spectrometer equipped with Bruker's 5 mm QNP (quad nucleus probe) or a 5 mm BBFO probe head operating at 400.11 (<sup>1</sup>H), 100.61 (<sup>13</sup>C) and 128.37 (<sup>11</sup>B) MHz, a Bruker Avance III HDX 600 spectrometer equipped with a 5 mm Prodigy BBO cryo probe head operating at 600.13 (<sup>1</sup>H) and 150.90 (<sup>13</sup>C) MHz or a Bruker Avance III HDX 700 NMR spectrometer equipped with a 5 mm TXI probe head operating at 700.29 (<sup>1</sup>H) and 176.9 (<sup>13</sup>C) MHz. Chemical shifts are reported in  $\delta$  values in ppm relative to external H<sub>3</sub>PO<sub>4</sub> (<sup>31</sup>P), 85%, Al(NO<sub>3</sub>)<sub>3</sub> (<sup>27</sup>Al), SiMe<sub>4</sub> (<sup>1</sup>H, <sup>13</sup>C), BF<sub>3</sub> · OEt<sub>2</sub> (<sup>11</sup>B) or Me<sub>2</sub>Se (<sup>77</sup>Se) using the <sup>2</sup>H resonance of the deuterated solvent and using  $\Xi$  = 25.145020 % for <sup>13</sup>C,  $\Xi$  = 32.083 974 % for <sup>11</sup>B,  $\Xi$  = 94.094011 % for <sup>19</sup>F,  $\Xi$  = 26.056859 % for <sup>29</sup>Al and,  $\Xi$  = 40.480742 for <sup>31</sup>P,  $\Xi$  = 19.071513 for <sup>77</sup>Se.<sup>8</sup> The multiplicity of the signals is indicated as s = singlet, d = doublet, t = triplet, q = quartet, sept = septet, m = multiplet or br = broad/unresolved. For the assignment of proton and carbon signals detailed analysis of <sup>1</sup>H, <sup>13</sup>C{<sup>1</sup>H}, <sup>1</sup>H–<sup>1</sup>H COSY, <sup>1</sup>H–<sup>13</sup>C HSQC, <sup>1</sup>H–<sup>13</sup>C HMBC, <sup>13</sup>C{<sup>1</sup>H} DEPT 135 and <sup>1</sup>H–<sup>1</sup>H NOESY spectra was done.

**Crystallography.** X-ray data were collected with a Bruker Smart APEX II diffractometer with graphite-monochromated Mo-K $\alpha$  radiation. The programs used were Bruker's APEX2 v2011.8-0, including SAINT for data reduction, SADABS for absorption correction, and SHELXS for structure solution, as well as the WinGX suite of programs version 1.70.01 or the GUI ShelXle, including SHELXL for structure refinement.

**IR spectroscopy.** The IR spectra were recorded as potassium bromide pellets, which were prepared in an MBraun glovebox and measured with a Bruker VERTEX 70 IR spectrometer.

## Syntheses

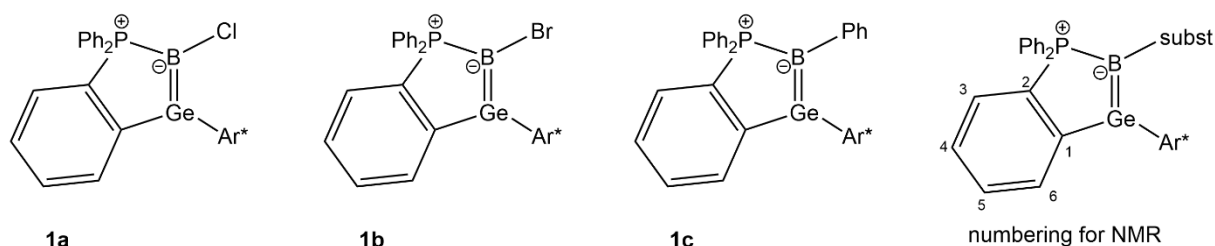

Scheme S11. Used germaborenes.

**2: 1b** (100 mg, 110  $\mu\text{mol}$ , 1 eq.) was dissolved in benzene (2 mL).  $\text{MeNHC}$  (12.8 mg, 103  $\mu\text{mol}$ , 0.93 eq.) was dissolved in benzene (2 mL) and added dropwise to the solution of **1b** and stirred at room temperature. After two hours, the resulting orange solution was cooled to  $-38\text{ }^\circ\text{C}$  and thereby frozen. The product was crystallized by layering pre-cooled *n*-pentane ( $-38\text{ }^\circ\text{C}$ , 6 mL) on top of the frozen solution and subsequently warming it up to room temperature. The obtained orange crystals were separated from the mother liquor and washed with *n*-pentane (5 mL). After drying under reduced pressure, **2** was isolated as an orange crystalline solid (89.9 mg, 87.2  $\mu\text{mol}$ , 79 %). Single crystals suitable for X-ray diffraction could be obtained by vapor diffusion of *n*-pentane into a solution of **2** in benzene at room temperature.  **$^1\text{H-NMR}$**  (500.13 MHz, 273.2 K,  $o\text{-C}_6\text{D}_4\text{Cl}_2$ ):  $\delta$  (ppm) = 7.80 – 7.73 (m, 1 H, *p*- $\text{C}_6\text{H}_3$ ), 7.65 – 7.61 (m, 2 H, *m*- $\text{C}_6\text{H}_3$ ), 7.61 – 7.57 (m, 1 H, H-6), 7.57 – 7.52 (m, 2 H, *p*- $\text{C}_6\text{H}_5$ ), 7.51 – 7.44 (m, 9 H, H-5, *o*- $\text{C}_6\text{H}_5$ , *m*- $\text{C}_6\text{H}_5$ ), 7.37 – 7.33 (m, 2 H, *m*- $\text{C}_6\text{H}_2$ ), 7.27 – 7.23 (m, 2 H, *m*- $\text{C}_6\text{H}_2$ ), 7.19 – 7.15 (m, 1 H, H-4, partly overlapping solvent signal), 7.14 – 7.09 (m, 1 H, H-3, partly overlapping solvent signal), 3.29 (sept,  $^3J_{\text{H-H}} = 6.6\text{ Hz}$ , *o*- $\text{CH}(\text{CH}_3)_2$ ), 3.06 (sept,  $^3J_{\text{H-H}} = 6.9\text{ Hz}$ , *p*- $\text{CH}(\text{CH}_3)_2$ ), 3.01 (s, 6 H, N- $\text{CH}_3$ ), 2.57 (sept,  $^3J_{\text{H-H}} = 6.8\text{ Hz}$ , *o*- $\text{CH}(\text{CH}_3)_2$ ), 2.17 (s, 6 H, C- $\text{CH}_3$ ), 1.40 – 1.35 (m, 12 H, *p*- $\text{CH}(\text{CH}_3)_2$ ), 1.32 (d,  $^3J_{\text{H-H}} = 6.5\text{ Hz}$ , 6 H, *o*- $\text{CH}(\text{CH}_3)_2$ ), 1.14 (d,  $^3J_{\text{H-H}} = 6.7\text{ Hz}$ , 6 H, *o*- $\text{CH}(\text{CH}_3)_2$ ), 0.91 (d,  $^3J_{\text{H-H}} = 6.8\text{ Hz}$ , 6 H, *o*- $\text{CH}(\text{CH}_3)_2$ ), 0.86 (d,  $^3J_{\text{H-H}} = 6.6\text{ Hz}$ , 6 H, *o*- $\text{CH}(\text{CH}_3)_2$ ).  **$^{13}\text{C}\{^1\text{H}\}\text{-NMR}$**  (125.76 MHz, 273.2 K,  $o\text{-C}_6\text{D}_4\text{Cl}_2$ ):  $\delta$  (ppm) = 151 – 150.3 (m, C-1, C-carbene), 149.1 (s, *p*- $\text{C}_6\text{H}_2$ ), 147.7 (s, *o*- $\text{C}_6\text{H}_2$ ), 147.4 (s, *o*- $\text{C}_6\text{H}_3$ ), 146.9 (s, *o*- $\text{C}_6\text{H}_2$ ), 142.0 (d,  $^3J_{31\text{P-}13\text{C}} = 19.9\text{ Hz}$ , *i*- $\text{C}_6\text{H}_3$ ), 137.7 (s, *i*- $\text{C}_6\text{H}_2$ ), 133.4 (d,  $^1J_{31\text{P-}13\text{C}} = 87.6\text{ Hz}$ , C-2), 133.0 (d,  $^3J_{31\text{P-}13\text{C}} = 14.2\text{ Hz}$ , C-6), 132.9 (s, C-5), 132.3 (s, *p*- $\text{C}_6\text{H}_5$ ), 131.7 (d,  $^2\text{ or }^3J_{31\text{P-}13\text{C}} = 10.4\text{ Hz}$ , *o*- $\text{C}_6\text{H}_5$  or *m*- $\text{C}_6\text{H}_5$ ), 130.7 (d,  $^2J_{31\text{P-}13\text{C}} = 8.5\text{ Hz}$ , C-3), 129.9 (d,  $^2\text{ or }^3J_{31\text{P-}13\text{C}} = 11.2\text{ Hz}$ , *o*- $\text{C}_6\text{H}_5$  or *m*- $\text{C}_6\text{H}_5$ ), 129.5 (s, *p*- $\text{C}_6\text{H}_3$ ), 129.4 (s, *m*- $\text{C}_6\text{H}_3$ ), 127.8 (d,  $^3J_{31\text{P-}13\text{C}} = 9.2\text{ Hz}$ , C-4), 127.6 (NC=CN, overlapping solvent signal, determined by HMBC experiment), 126.1 (d,  $^1J_{31\text{P-}13\text{C}} = 66.1\text{ Hz}$ , *i*- $\text{C}_6\text{H}_5$ ), 121.5 (s, *m*- $\text{C}_6\text{H}_2$ ), 120.5 (s, *m*- $\text{C}_6\text{H}_2$ ), 34.8 (s, *p*- $\text{CH}(\text{CH}_3)_2$ ), 34.6 (s, N $\text{CH}_3$ ), 31.3 (s, *o*- $\text{CH}(\text{CH}_3)_2$ ), 30.6 (s, *o*- $\text{CH}(\text{CH}_3)_2$ ), 27.1 (s, *o*- $\text{CH}(\text{CH}_3)_2$ ), 25.7 (s, *o*- $\text{CH}(\text{CH}_3)_2$ ), 24.5 (s, *p*- $\text{CH}(\text{CH}_3)_2$ ), 24.4 (s, *p*- $\text{CH}(\text{CH}_3)_2$ ), 23.0 (s, *o*- $\text{CH}(\text{CH}_3)_2$ ), 22.7 (s, *o*- $\text{CH}(\text{CH}_3)_2$ ), 9.3 (s, C- $\text{CH}_3$ ).  **$^{11}\text{B}\{^1\text{H}\}\text{-NMR}$**  (160.46 MHz, 273.2 K,  $o\text{-C}_6\text{D}_4\text{Cl}_2$ ):  $\delta$  (ppm) = 0.1 (d,  $^1J_{31\text{P-}11\text{B}} = 131.4\text{ Hz}$ ).  **$^{31}\text{P}\{^1\text{H}\}\text{-NMR}$**  (202.46 MHz, 273.2 K,  $o\text{-C}_6\text{D}_4\text{Cl}_2$ ):  $\delta$  (ppm) = 17.9 (broad unresolved q). **Elemental analysis:** Calculated (%) for  $\text{C}_{61}\text{H}_{75}\text{BBrGePN}_2$ : 71.09 C, 7.34 H, 2.72 N Found: 71.45 C, 7.33 H, 2.69 N.

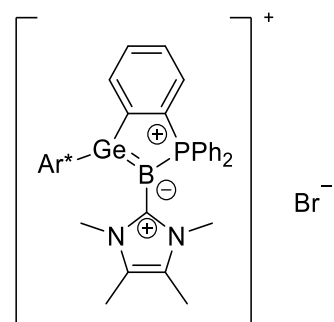

**3**: A solution of **1a** (100 mg, 116  $\mu\text{mol}$ , 1 eq.) in benzene (2 mL) was added to 1-adamantyl isocyanide (18.7 mg, 116  $\mu\text{mol}$ , 1 eq.) and stirred for 18 h at room temperature and subsequently heated to 60 °C for 5 days. The solution, initially intense red, turned orange during the reaction. The solvent was removed under reduced pressure and residual solvent in the residue was removed by co-evaporation with *n*-pentane (2 mL). The crude product was washed with *n*-pentane (2  $\times$  2 mL, 1  $\times$  4 mL) and after drying under reduced pressure, an orange powder of **3** (85.5 mg, 83.6  $\mu\text{mol}$ , 72%) was obtained. Yellow single crystals suitable for X-ray diffraction were obtained

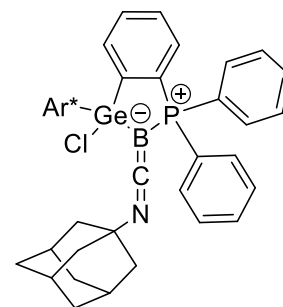

by vapor diffusion of *n*-pentane into a concentrated solution of **3** in benzene at room temperature. **<sup>1</sup>H-NMR** (400.11 MHz, 299.2 K, C<sub>6</sub>D<sub>6</sub>):  $\delta$  (ppm) = 7.89 – 7.78 (m, 2 H, *o*-C<sub>6</sub>H<sub>5</sub>), 7.36 – 7.31 (m, 2 H, *m*-C<sub>6</sub>H<sub>2</sub>), 7.18 – 6.97 (m, 12 H, 2  $\times$  *o*-C<sub>6</sub>H<sub>5</sub>, 2  $\times$  *m*-C<sub>6</sub>H<sub>5</sub>, 1  $\times$  *p*-C<sub>6</sub>H<sub>5</sub>, 2  $\times$  *m*-C<sub>6</sub>H<sub>3</sub>, 2  $\times$  *m*-C<sub>6</sub>H<sub>2</sub>, *p*-C<sub>6</sub>H<sub>3</sub>, H-5, H-3, partly overlapping solvent signal), 6.86 – 6.78 (m, 3 H, 1  $\times$  *p*-C<sub>6</sub>H<sub>5</sub>, H-6, H-4), 6.75 – 6.67 (m, 2 H, 2  $\times$  *m*-C<sub>6</sub>H<sub>5</sub>), 3.36 – 3.08 (m, 4 H, *o*-CH(CH<sub>3</sub>)<sub>2</sub>), 2.99 (sept, 2 H, <sup>3</sup>J<sub>H-H</sub> = 6.9 Hz, *p*-CH(CH<sub>3</sub>)<sub>2</sub>), 1.85 – 1.78 (m, 3 H, Ad-CH), 1.57 – 1.50 (m, 3 H, Ad-CH<sub>2</sub>), 1.49 – 1.34 (m, 27 H, 6  $\times$  *o*-CH(CH<sub>3</sub>)<sub>2</sub>, 12  $\times$  *p*-CH(CH<sub>3</sub>)<sub>2</sub>), 9  $\times$  Ad-CH<sub>2</sub>), 1.18 (d, 6 H, <sup>3</sup>J<sub>H-H</sub> = 6.8 Hz, *o*-CH(CH<sub>3</sub>)<sub>2</sub>), 1.03 (d, 6 H, <sup>3</sup>J<sub>H-H</sub> = 6.8 Hz, *o*-CH(CH<sub>3</sub>)<sub>2</sub>), 1.01 (d, 6 H, <sup>3</sup>J<sub>H-H</sub> = 6.8 Hz, *o*-CH(CH<sub>3</sub>)<sub>2</sub>). **<sup>13</sup>C{<sup>1</sup>H}-NMR** (100.62 MHz, 299.2 K, C<sub>6</sub>D<sub>6</sub>):  $\delta$  (ppm) = 155.9 (d, <sup>2</sup>J<sub>31P-13C</sub> = 25.0 Hz, C-1), 147.9 (s, *p*-C<sub>6</sub>H<sub>2</sub>), 146.9 (s, *o*-C<sub>6</sub>H<sub>2</sub>), 146.5 (s, *o*-C<sub>6</sub>H<sub>2</sub>), 146.3 (s, *o*-C<sub>6</sub>H<sub>3</sub>), 141.6 (d, <sup>3</sup>J<sub>31P-13C</sub> = 9.1 Hz, *i*-C<sub>6</sub>H<sub>3</sub>), 139.3 (s, *i*-C<sub>6</sub>H<sub>2</sub>), 135.9 (d, <sup>3</sup>J<sub>31P-13C</sub> = 13.1 Hz, C-6), 134.2 (d, <sup>1</sup>J<sub>31P-13C</sub> = 77.5 Hz, C-2), 133.5 (d, <sup>1</sup>J<sub>31P-13C</sub> = 66.2 Hz, *i*-C<sub>6</sub>H<sub>5</sub>), 133.0 (d, <sup>2</sup>J<sub>31P-13C</sub> = 10.3 Hz, *o*-C<sub>6</sub>H<sub>5</sub>), 132.8 (d, <sup>2</sup>J<sub>31P-13C</sub> = 10.6 Hz, *o*-C<sub>6</sub>H<sub>5</sub>), 132.0 (s, *m*-C<sub>6</sub>H<sub>3</sub>), 130.9 – 130.7 (m, *p*-C<sub>6</sub>H<sub>5</sub>, C-3), 130.4 (d, <sup>1</sup>J<sub>31P-13C</sub> = 67.8 Hz, *i*-C<sub>6</sub>H<sub>5</sub>), 130.4 (d, <sup>4</sup>J<sub>31P-13C</sub> = 2.2 Hz, C-5), 129.9 (d, <sup>4</sup>J<sub>31P-13C</sub> = *p*-C<sub>6</sub>H<sub>5</sub>), 128.3 (d, <sup>3</sup>J<sub>31P-13C</sub> = 11.2 Hz, *m*-C<sub>6</sub>H<sub>5</sub>), 128.2 (d, <sup>3</sup>J<sub>31P-13C</sub> = 11.2 Hz, *m*-C<sub>6</sub>H<sub>5</sub>), 127.6 (d, <sup>3</sup>J<sub>31P-13C</sub> = 8.7 Hz, C-4, overlapping solvent signal), 127.2 (s, *p*-C<sub>6</sub>H<sub>3</sub>), 121.7 (s, *m*-C<sub>6</sub>H<sub>2</sub>), 121.0 (s, *m*-C<sub>6</sub>H<sub>2</sub>), 60.0 (d, <sup>4</sup>J<sub>31P-13C</sub> = 6.1 Hz, Ad-C<sub>q</sub>), 43.4 (s, Ad-CH<sub>2</sub>), 36.2 (s, Ad-CH<sub>2</sub>), 34.4 (s, *p*-CH(CH<sub>3</sub>)<sub>2</sub>), 31.2 (s, *o*-CH(CH<sub>3</sub>)<sub>2</sub>), 30.9 (s, *o*-CH(CH<sub>3</sub>)<sub>2</sub>), 30.0 (Ad-CH), 25.8 (s, *o*-CH(CH<sub>3</sub>)<sub>2</sub>), 25.4 (s, *o*-CH(CH<sub>3</sub>)<sub>2</sub>), 24.3 (s, *p*-CH(CH<sub>3</sub>)<sub>2</sub>), 24.0 (s, *p*-CH(CH<sub>3</sub>)<sub>2</sub>), 23.4 (*o*-CH(CH<sub>3</sub>)<sub>2</sub>), 22.7 (s, *o*-CH(CH<sub>3</sub>)<sub>2</sub>). GeClB<sub>3</sub>C<sub>3</sub>NAd not observed. **<sup>31</sup>P{<sup>1</sup>H}-NMR** (161.97 MHz, 299.2 K, C<sub>6</sub>D<sub>6</sub>):  $\delta$  (ppm) = 27.8 (broad unresolved q). **<sup>11</sup>B{<sup>1</sup>H}-NMR** (128.37 MHz, 299.2 K, C<sub>6</sub>D<sub>6</sub>):  $\delta$  (ppm) = -21.4 (d, <sup>1</sup>J<sub>31P-11B</sub> = 115.7 Hz). **Elemental analysis**: Calculated (%) for C<sub>67</sub>H<sub>75</sub>BBrGePn<sub>2</sub>: 76.30 C, 7.68 H, 1.37 N Found: 76.66 C, 7.83 H, 1.36 N. **IR (KBr)**: 1893 cm<sup>-1</sup> ( $\nu$  C=N).

**4**: **3** (77.1 mg, 75.4  $\mu\text{mol}$ , 1 eq.) and Na[BAR<sup>F</sup><sub>4</sub>] (66.7 mg, 75.3  $\mu\text{mol}$ , 1 eq.) were combined and stirred thoroughly to ensure a homogeneous distribution of both components. Benzene (1.5 mL) and *o*-difluorobenzene (1.5 mL) were added and the resulting mixture stirred for 5 h at room temperature.

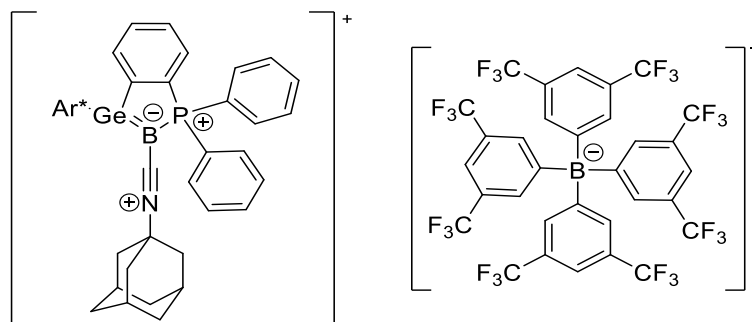

The resulting orange suspension was filtered, and the solvent was removed from the filtrate under reduced pressure. Residual solvent was removed by co-evaporation with *n*-pentane (1  $\times$  4 mL, 3  $\times$  2 mL). The orange solid crude product was washed with *n*-pentane (3  $\times$  2 mL) and dried under reduced pressure. The product was obtained as orange solid (113 mg, 61  $\mu\text{mol}$ , 81 %). Orange single crystals suitable for X-Ray diffraction could be obtained from a solution of **4** in a mixture of *n*-pentane (1 ml) and *o*-difluorobenzene (0.1 ml) at room temperature. **<sup>1</sup>H-NMR** (400.11 MHz, 299.2 K, C<sub>6</sub>D<sub>6</sub>):  $\delta$  (ppm) = 8.42 – 8.34 (m, 8 H, *o*-BAR<sup>F</sup><sub>4</sub>), 7.67 (br s, 4 H, *p*-BAR<sup>F</sup><sub>4</sub>), 7.40 – 7.29 (m, 3 H, *m*-C<sub>6</sub>H<sub>3</sub>, *p*-C<sub>6</sub>H<sub>3</sub>), 7.27 – 7.22 (m, 1 H, H-6), 7.18 – 6.91 (m, 15 H, 4  $\times$  *m*-C<sub>6</sub>H<sub>2</sub>, H-5, 10  $\times$  C<sub>6</sub>H<sub>5</sub>, overlapping solvent signal), 6.89 – 6.82 (m, 1 H, H-3), 6.75 – 6.69 (m, 1 H, H-4), 2.86 (sept, 4 H, <sup>3</sup>J<sub>H-H</sub> = 6.8 Hz, *o*-CH(CH<sub>3</sub>)<sub>2</sub>), 2.66 (sept, 2 H, <sup>3</sup>J<sub>H-H</sub> = 6.9 Hz, *p*-CH(CH<sub>3</sub>)<sub>2</sub>), 1.76 – 1.63 (m, 3 H, Ad-CH), 1.63 – 1.54 (m, 6 H, N-Ad-CH<sub>2</sub>), 1.37 – 0.88 (m, 42 H,

6 × Ad-CH<sub>2</sub>, 24 × *o*-CH(CH<sub>3</sub>)<sub>2</sub>, 12 × *p*-CH(CH<sub>3</sub>)<sub>2</sub>, partly overlapped by *n*-pentane and unidentified impurity). **<sup>13</sup>C{<sup>1</sup>H}-NMR** (100.62 MHz, 299.2 K, C<sub>6</sub>D<sub>6</sub>): δ (ppm) = 162.4 (q, <sup>1</sup>J<sub>13C-11B</sub> = 50.0 Hz, *i*-BAR<sup>F</sup><sub>4</sub>), 150.5 (s, *p*-C<sub>6</sub>H<sub>2</sub>), 147.2 (br, C-1, only found in HMBC experiment), 146.9 (s, *o*-C<sub>6</sub>H<sub>2</sub>), 146.2 (s, *o*-C<sub>6</sub>H<sub>3</sub>), 141.6 (br, *i*-C<sub>6</sub>H<sub>3</sub>), 135.6 (s, *i*-C<sub>6</sub>H<sub>2</sub>), 135.1 (br, *o*-BAR<sup>F</sup><sub>4</sub>), 133.4 (d, <sup>3</sup>J<sub>31P-13C</sub> = 14.1 Hz, C-6), 133.1 (d, <sup>4</sup>J<sub>31P-13C</sub> = 2.2 Hz, C-5), 133.0 (d, <sup>4</sup>J<sub>31P-13C</sub> = 2.2 Hz, *p*-C<sub>6</sub>H<sub>5</sub>), 132.6 (d, <sup>1</sup>J<sub>31P-13C</sub> = ca. 90 Hz, C-2), 131.5 (d, <sup>2</sup>J<sub>31P-13C</sub> = 11.1 Hz, *o*-C<sub>6</sub>H<sub>5</sub>), 130.7 (d, <sup>2</sup>J<sub>31P-13C</sub> = 8.8 Hz, C-3), 130.5 (s, *p*-C<sub>6</sub>H<sub>3</sub>), 130.3 (d, <sup>3</sup>J<sub>31P-13C</sub> = 9.7 Hz, C-4), 129.7 (s, *m*-C<sub>6</sub>H<sub>3</sub>), 129.5 (qq, <sup>2</sup>J<sub>19F-13C</sub> = ca. 31.6 Hz, <sup>3</sup>J<sub>13C-11B</sub> = ca. 2.9 Hz, *m*-BAR<sup>F</sup><sub>4</sub>), 129.4 (d, <sup>3</sup>J<sub>31P-13C</sub> = 12.0 Hz, *m*-C<sub>6</sub>H<sub>2</sub>), 124.9 (q, <sup>1</sup>J<sub>19F-13C</sub> = 273.6 Hz, CF<sub>3</sub>), 124.8 (d, <sup>1</sup>J<sub>31P-13C</sub> = 71.3 Hz, *i*-C<sub>6</sub>H<sub>5</sub>), 121.0 (s, *m*-C<sub>6</sub>H<sub>2</sub>), 117.7 (sept., <sup>4</sup>J<sub>19F-13C</sub> = ca. 3.8 Hz, *p*-BAR<sup>F</sup><sub>4</sub>), 61.4 (s, Ad-NC<sub>q</sub>), 42.4 (s, Ad-N-CCH<sub>2</sub>), 34.3 (s, *p*-CH(CH<sub>3</sub>)<sub>2</sub>), 34.3 (s, Ad-CHCH<sub>2</sub>), 30.7 (s, *o*-CH(CH<sub>3</sub>)<sub>2</sub>), 28.5 (s, Ad-CHCH<sub>2</sub>), 26.0 (br s, *o*-CH(CH<sub>3</sub>)<sub>2</sub>), 23.6 (s, *p*-CH(CH<sub>3</sub>)<sub>2</sub>), 22.5 (*o*-CH(CH<sub>3</sub>)<sub>2</sub>). **<sup>11</sup>B{<sup>1</sup>H}-NMR** (128.37 MHz, 299.2 K, toluene-*d*<sub>8</sub>): δ (ppm) = -6.0 ppm (s, [BAR<sup>F</sup><sub>4</sub>]), -13.4 (d, <sup>1</sup>J<sub>31P-11B</sub> = 149.0 Hz, Ge=B). **<sup>31</sup>P{<sup>1</sup>H}-NMR** (161.97 MHz, 299.2 K, toluene-*d*<sub>8</sub>): δ (ppm) = 28.7 (q, <sup>1</sup>J<sub>31P-11B</sub> = ca. 152.4 Hz, Ge=B-P). **<sup>19</sup>F{<sup>1</sup>H}-NMR** (376.48 MHz, 299.2 K, toluene-*d*<sub>8</sub>): δ (ppm) = -62.2 (s, CF<sub>3</sub>). **Elemental analysis:** Calculated (%) for C<sub>97</sub>H<sub>90</sub>B<sub>2</sub>F<sub>24</sub>GeNP: 62.94 C, 4.90 H, 0.76 N. Found: 63.52 C, 4.66 H, 0.81 N. **IR (KBr):** 2160 cm<sup>-1</sup> (ν C=N).

**5: 1b** (74.1 mg, 81.8 μmol, 1 eq.) was dissolved in benzene (2 mL) and transferred in a Schlenk tube. By using the „freeze-pump-thaw“-technique, Argon was removed from the atmosphere and replaced by carbon monoxide (1 atm.). The solution, initially intense red, turned orange during the reaction. After stirring for 19h at room temperature, all volatile components were removed under reduced pressure, yielding an orange powder of **5** (74.1 mg, 79.3 μmol, 97 %). Single crystals suitable for X-Ray crystallography could be obtained by slow evaporation of a concentrated solution of **5** in *n*-pentane at -40 °C. **<sup>1</sup>H-NMR** (400.11 MHz, 299.2 K, C<sub>6</sub>D<sub>6</sub>): δ (ppm) = 7.50 – 7.39 (m, 4 H, *o*-C<sub>6</sub>H<sub>5</sub>), 7.35 – 7.29 (m, 2 H, *m*-C<sub>6</sub>H<sub>2</sub>), 7.14 – 6.98 (m, 9 H, 2 × *m*-C<sub>6</sub>H<sub>5</sub>, 2 × *m*-C<sub>6</sub>H<sub>3</sub>, 2 × *m*-C<sub>6</sub>H<sub>2</sub>, H-3, *p*-C<sub>6</sub>H<sub>3</sub>, *p*-C<sub>6</sub>H<sub>5</sub>), 6.93 – 6.86 (m, 1 H, H-5), 6.81 – 6.75 (m, 1 H, *p*-C<sub>6</sub>H<sub>5</sub>), 6.74 – 6.65 (m, 3 H, H-4, *m*-C<sub>6</sub>H<sub>5</sub>), 6.44 – 6.37 (m, 1 H, H-6), 3.42 – 3.24 (m, 2 H, *o*-CH(CH<sub>3</sub>)<sub>2</sub>), 3.24 – 3.06 (m, 2 H, *o*-CH(CH<sub>3</sub>)<sub>2</sub>), 2.94 (sept, 2 H, <sup>3</sup>J<sub>H-H</sub> = 6.9 Hz, *p*-CH(CH<sub>3</sub>)<sub>2</sub>), 1.37 (d, 12 H, <sup>3</sup>J<sub>H-H</sub> = 7.0 Hz, *p*-CH(CH<sub>3</sub>)<sub>2</sub>), 1.35 – 1.26 (m, 6 H, *o*-CH(CH<sub>3</sub>)<sub>2</sub>), 1.26 – 1.07 (m, 12 H, *o*-CH(CH<sub>3</sub>)<sub>2</sub>), 1.02 (d, 6 H, <sup>3</sup>J<sub>H-H</sub> = 6.7 Hz, *o*-CH(CH<sub>3</sub>)<sub>2</sub>). **<sup>13</sup>C{<sup>1</sup>H}-NMR** (100.61 MHz, 299.2 K, C<sub>6</sub>D<sub>6</sub>): δ (ppm) = 220.4 (br q, B=C=O, only detectable when using <sup>13</sup>CO as reagent), 152.7 (d, <sup>2</sup>J<sub>31P-13C</sub> = 26.4 Hz, C-1), 148.8 (s, *p*-C<sub>6</sub>H<sub>2</sub>), 147.3 (s, *o*-C<sub>6</sub>H<sub>2</sub>), 146.8 (s, *o*-C<sub>6</sub>H<sub>2</sub>), 145.3 (br, *o*-C<sub>6</sub>H<sub>3</sub>), 141.3 (d, <sup>3</sup>J<sub>31P-13C</sub> = 4.9 Hz, *i*-C<sub>6</sub>H<sub>3</sub>), 139.0 (s, *i*-C<sub>6</sub>H<sub>2</sub>), 136.6 (d, <sup>3</sup>J<sub>31P-13C</sub> = 13.6 Hz, C-6), 132.6 (d, <sup>2</sup>J<sub>31P-13C</sub> = 11.8 Hz, *o*-C<sub>6</sub>H<sub>5</sub>), 132.1 (s, *m*-C<sub>6</sub>H<sub>3</sub>), 131.9 (d, <sup>2</sup>J<sub>31P-13C</sub> = 10.4 Hz, *o*-C<sub>6</sub>H<sub>5</sub>), 131.8 (d, <sup>1</sup>J<sub>31P-13C</sub> = 75.0 Hz, C-2), 131.2 (d, <sup>4</sup>J<sub>31P-13C</sub> = 2.2 Hz, *p*-C<sub>6</sub>H<sub>5</sub>), 131.0 (d, <sup>1</sup>J<sub>31P-13C</sub> = 58.9 Hz, *i*-C<sub>6</sub>H<sub>5</sub>), 130.9 (d, <sup>4</sup>J<sub>31P-13C</sub> = 2.0 Hz, C-5), 130.6 (d, <sup>4</sup>J<sub>31P-13C</sub> = 1.9 Hz, *p*-C<sub>6</sub>H<sub>5</sub>), 130.4 (d, <sup>1</sup>J<sub>31P-13C</sub> = 57.3 Hz, *i*-C<sub>6</sub>H<sub>5</sub>), 130.0 (d, J = 7.6 Hz, C-3), 128.7 (d, <sup>3</sup>J<sub>31P-13C</sub> = 12.1 Hz, *m*-C<sub>6</sub>H<sub>5</sub>), 128.5 (d, <sup>3</sup>J<sub>31P-13C</sub> = 11.8 Hz, *m*-C<sub>6</sub>H<sub>5</sub>), 127.8 (d, <sup>3</sup>J<sub>31P-13C</sub> = 9.4 Hz, C-4, overlapping solvent signal), 127.6 (s, *p*-C<sub>6</sub>H<sub>3</sub>, overlapping solvent signal), 121.8 (s, *m*-C<sub>6</sub>H<sub>2</sub>), 121.6 (s, *m*-C<sub>6</sub>H<sub>2</sub>), 34.6 (s, *p*-CH(CH<sub>3</sub>)<sub>2</sub>), 31.1 (s, *o*-CH(CH<sub>3</sub>)<sub>2</sub>), 30.9 (s, *o*-CH(CH<sub>3</sub>)<sub>2</sub>), 25.6 (s, *o*-CH(CH<sub>3</sub>)<sub>2</sub>), 25.2 (s, *o*-CH(CH<sub>3</sub>)<sub>2</sub>), 24.2 (s, *p*-CH(CH<sub>3</sub>)<sub>2</sub>), 24.0 (s, *p*-CH(CH<sub>3</sub>)<sub>2</sub>), 23.6 – 23.1 (m, *o*-CH(CH<sub>3</sub>)<sub>2</sub>). **<sup>11</sup>B{<sup>1</sup>H}-NMR** (128.37 MHz, 299.2 K, C<sub>6</sub>D<sub>6</sub>): δ (ppm) = -39.7 (d, <sup>1</sup>J<sub>31P-11B</sub> = 121.3 Hz). **<sup>31</sup>P{<sup>1</sup>H}-NMR** (161.97 MHz, 299.2 K, C<sub>6</sub>D<sub>6</sub>): δ (ppm) = 40.1 (broad unresolved q). **Elemental analysis:** Calculated (%) for C<sub>55</sub>H<sub>63</sub>BBrGePO: 70.70 C, 6.80 H. Found: 71.21 C, 6.83 H. **IR (KBr):** 1984 cm<sup>-1</sup> (ν CO).

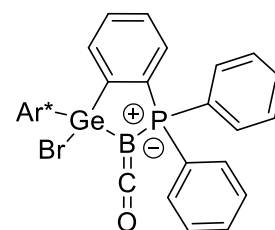

**6: 5** (70.9 mg, 75.9  $\mu\text{mol}$ , 1 eq.) was dissolved in benzene (5 mL). To this solution, a suspension of  $\text{Ag}[\text{Al}(\text{OtBu}^{\text{F}})_4]$  (81.6 mg, 75.9  $\mu\text{mol}$ , 1 eq.) in *o*-difluorobenzene (1.5 mL) was added. The orange reaction mixture turns considerably darker over the course of the reaction.

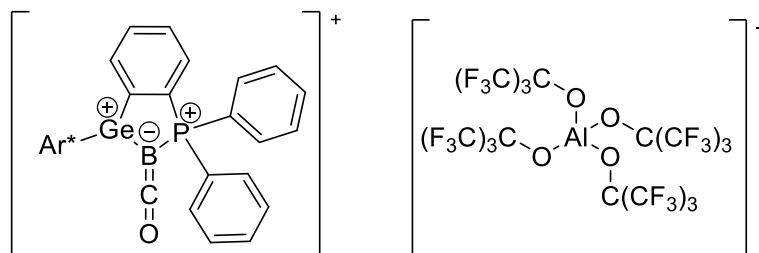

After stirring for ten minutes at room temperature, the reaction mixture was filtered. The solvent was removed from the filtrate under reduced pressure and residual solvent was removed from the obtained dark orange oil by co-evaporation with *n*-pentane (4 mL). The solid orange crude product was dissolved in *o*-difluorobenzene (1.5 mL) and concentrated to ca. 0.3 mL and cooled to  $-40\text{ }^{\circ}\text{C}$ . Cold *n*-pentane (3 mL,  $-40\text{ }^{\circ}\text{C}$ ) was layered on top of the cold solution and the mixture was stored at  $-40\text{ }^{\circ}\text{C}$  for crystallization. After four days, the mother liquor was removed from the orange crystals and the crystals were washed with *n*-pentane ( $2 \times 1\text{ mL}$ ). A second crystallization was performed by dissolving the crystalline solid in *o*-difluorobenzene (0.4 mL), concentrating the solution almost to dryness, and layering *n*-pentane (3.4 mL) on top of the solution and storing the mixture at  $-40\text{ }^{\circ}\text{C}$  for one day. The mother liquor was removed and the crystals were washed with *o*-difluorobenzene (0.5 mL) and *n*-pentane ( $2 \times 2\text{ mL}$ ) and dried under reduced pressure. Residual solvent was removed by co-evaporation with *n*-pentane (1 mL). The product  $[\text{GeBCO}][\text{Al}(\text{OtBu}^{\text{F}})_4]$  (48.8 mg, 26.8  $\mu\text{mol}$ , 35.3 %) was obtained as an orange crystalline solid. The mother liquor from the second crystallization was combined with the washing solution and stored at  $-40\text{ }^{\circ}\text{C}$  for two months. From this solution, further product crystallized and after removing the mother liquor and drying under reduced pressure **6** was isolated as an orange crystalline solid (combined yield: 96.1 mg, 52.8  $\mu\text{mol}$ , 69.5 %). Orange single crystals from the first crystallization were suitable for X-Ray diffraction.  **$^1\text{H-NMR}$**  (400.11 MHz, 299.2 K,  $\text{C}_6\text{D}_6 + o\text{-C}_6\text{H}_4\text{F}_2$ ):  $\delta$  (ppm) = 7.46 – 7.37 (m, 3 H, *m*- $\text{C}_6\text{H}_3$ , *p*- $\text{C}_6\text{H}_3$ ), 7.26 – 6.89 (m, 14 H,  $\text{PCH}_{\text{ar}}$ , overlapping solvent signal), 6.88 (s, 4 H, *m*- $\text{C}_6\text{H}_2$ ), 2.81 (sept,  $^3J_{\text{H-H}} = 6.8\text{ Hz}$ , 4 H, *o*- $\text{CH}(\text{CH}_3)_2$ ), 2.51 (sept,  $^3J_{\text{H-H}} = 6.9\text{ Hz}$ , 2 H, *p*- $\text{CH}(\text{CH}_3)_2$ ), 1.00 (d,  $^3J_{\text{H-H}} = 6.7\text{ Hz}$ , 12 H, *o*- $\text{CH}(\text{CH}_3)_2$ ), 0.96 (d,  $^3J_{\text{H-H}} = 6.8\text{ Hz}$ , 12 H, *o*- $\text{CH}(\text{CH}_3)_2$ ), 0.89 (d,  $^3J_{\text{H-H}} = 7.0\text{ Hz}$ , 12 H, *p*- $\text{CH}(\text{CH}_3)_2$ ).  **$^{13}\text{C}\{^1\text{H}\}\text{-NMR}$**  (100.61 MHz, 299.2 K,  $\text{C}_6\text{D}_6 + o\text{-C}_6\text{H}_4\text{F}_2$ ):  $\delta$  (ppm) = 203.4 (q,  $^1J_{13\text{C}-11\text{B}} = 111.6\text{ Hz}$ ,  $\text{BCO}$ , only detectable when using  $^{13}\text{C}$ -labelled CO), 151.7 (s, *p*- $\text{C}_6\text{H}_2$ ), 147.0 (s, *o*- $\text{C}_6\text{H}_2$ ), 145.5 (s, *o*- $\text{C}_6\text{H}_3$ ), 144.3 (br,  $\text{PC}_{\text{ar,q}}$ ), 142.7 (d,  $^3J_{31\text{P}-13\text{C}} = 8.7\text{ Hz}$ , *i*- $\text{C}_6\text{H}_3$ ), 135.2 (s, *i*- $\text{C}_6\text{H}_2$ ), 133.8 (d,  $J_{31\text{P}-13\text{C}} = 2.3\text{ Hz}$ ,  $\text{PC}_{\text{ar}}$ ), 133.5 (d,  $J_{31\text{P}-13\text{C}} = 13.2\text{ Hz}$ ,  $\text{PC}_{\text{ar}}$ ), 133.3 (d,  $J_{31\text{P}-13\text{C}} = 2.0\text{ Hz}$ ,  $\text{PC}_{\text{ar}}$ ), 132.9 (d,  $J_{31\text{P}-13\text{C}} = 10.1\text{ Hz}$ ,  $\text{PC}_{\text{ar}}$ ), 131.9 (s, *p*- $\text{C}_6\text{H}_3$ ), 131.8 – 131.5 (m,  $\text{PC}_{\text{ar}}$ ), 129.8 (d,  $J_{31\text{P}-13\text{C}} = 12.7\text{ Hz}$ ,  $\text{PC}_{\text{ar}}$ ), 129.7 (s, *m*- $\text{C}_6\text{H}_3$ ), 122.9 (d,  $J_{31\text{P}-13\text{C}} = 75.8\text{ Hz}$ ,  $\text{PC}_{\text{ar,q}}$ ), 122.1 (s, *m*- $\text{C}_6\text{H}_2$ ), 121.9 (q,  $^1J_{19\text{F}-13\text{C}} = 292.8\text{ Hz}$ ,  $\text{CF}_3$ ), 79.6 (br,  $\text{C}(\text{CF}_3)_3$ ), 34.2 (s, *p*- $\text{CH}(\text{CH}_3)_2$ ), 30.8 (s, *o*- $\text{CH}(\text{CH}_3)_2$ ), 26.2 (s, *o*- $\text{CH}(\text{CH}_3)_2$ ), 23.2 (s, *p*- $\text{CH}(\text{CH}_3)_2$ ), 21.2 (*o*- $\text{CH}(\text{CH}_3)_2$ ).  **$^{11}\text{B}\{^1\text{H}\}\text{-NMR}$**  (128.37 MHz, 299.2 K,  $\text{C}_6\text{D}_6 + o\text{-C}_6\text{H}_4\text{F}_2$ ):  $\delta$  (ppm) =  $-24.8$  (d,  $^1J_{31\text{P}-11\text{B}} = 168.2\text{ Hz}$ );  $^{13}\text{C}$  labelled sample:  $-24.8$  (dd,  $^1J_{31\text{P}-11\text{B}} = 160.1\text{ Hz}$ ,  $^1J_{13\text{C}-11\text{B}} = 119.3\text{ Hz}$ ).  **$^{19}\text{F}\{^1\text{H}\}\text{-NMR}$**  (376.48 MHz, 299.2 K,  $\text{C}_6\text{D}_6 + o\text{-C}_6\text{H}_4\text{F}_2$ ):  $\delta$  (ppm) =  $-74.9$  (s,  $\text{CF}_3$ ).  **$^{27}\text{Al}\{^1\text{H}\}\text{-NMR}$**  (104.26 MHz, 299.2 K,  $\text{C}_6\text{D}_6 + o\text{-C}_6\text{H}_4\text{F}_2$ ) = 35.3 (s).  **$^{31}\text{P}\{^1\text{H}\}\text{-NMR}$**  (161.97 MHz, 299.2 K,  $\text{C}_6\text{D}_6 + o\text{-C}_6\text{H}_4\text{F}_2$ ):  $\delta$  (ppm) = 32.3 (q,  $^1J_{31\text{P}-11\text{B}} = 166.1\text{ Hz}$ ). **Elemental analysis:** Calculated (%) for  $\text{C}_{71}\text{H}_{90}\text{AlBrGeN}_2\text{P}\cdot\text{C}_7\text{H}_8$ : 46.82 C, 3.49 H. Found: 47.10 C, 3.755 H. **IR (KBr):** 2024  $\text{cm}^{-1}$  ( $\nu\text{ CO}$ ).

**7:** **1c** (70.7 mg, 78.2  $\mu\text{mol}$ , 1 eq.) and selenium (6.5 mg, 82.3  $\mu\text{mol}$ , 1.05 eq.) were combined. The mixture was suspended in benzene (2 mL) and stirred for 21 h at room temperature. After filtration of the dark suspension, the solvent was removed from the pale-yellow filtrate by evaporation under reduced pressure and residual solvent was removed by co-evaporation with *n*-pentane (4 mL). After crystallization from toluene at room temperature and washing the obtained crystals with *n*-pentane (0.5 mL), a pale yellow

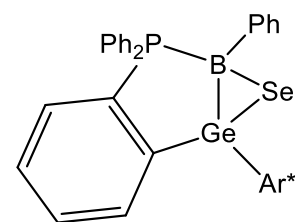

crystalline solid of **7** (29.6 mg, 30.1  $\mu\text{mol}$ , 39%) was obtained. The obtained crystals were suitable for X-Ray diffraction.  $^1\text{H-NMR}$  (600.13 MHz, 253.0 K, toluene- $d_8$ ):  $\delta$  (ppm) = 7.74 – 7.64 (m, 1 H, H-6), 7.47 – 7.32 (m, 6 H, 2  $\times$  *m*-C<sub>6</sub>H<sub>3</sub>, 2  $\times$  *o*-PC<sub>6</sub>H<sub>5</sub>, 2  $\times$  *o*-BC<sub>6</sub>H<sub>5</sub>), 7.31 – 7.25 (m, 2 H, *m*-C<sub>6</sub>H<sub>2</sub>, *p*-C<sub>6</sub>H<sub>3</sub>), 7.18 – 7.05 (m, 7 H, 3  $\times$  *m*-C<sub>6</sub>H<sub>2</sub>, *p*-PC<sub>6</sub>H<sub>5</sub>, 2  $\times$  *m*-BC<sub>6</sub>H<sub>5</sub>, *p*-BC<sub>6</sub>H<sub>5</sub>, partly overlapping solvent signal), 7.05 – 6.98 (m, 5 H, H-5, 2  $\times$  *m*-PC<sub>6</sub>H<sub>5</sub>, 2  $\times$  *o*-PC<sub>6</sub>H<sub>5</sub>, partly overlapping solvent signal), 6.94 – 6.90 (m, 1 H, H-3), 6.90 – 6.86 (m, 1 H, *p*-PC<sub>6</sub>H<sub>5</sub>), 6.82 – 6.77 (m, 1 H, H-4), 6.75 – 6.66 (m, 2 H, *m*-PC<sub>6</sub>H<sub>5</sub>), 3.49 (sept,  $^3J_{\text{H-H}} = 6.6$  Hz, 1 H, *o*-CH(CH<sub>3</sub>)<sub>2</sub>), 3.27 (sept,  $^3J_{\text{H-H}} = 6.7$  Hz, 1H, *o*-CH(CH<sub>3</sub>)<sub>2</sub>), 3.00 – 2.86 (m, 2 H, *p*-CH(CH<sub>3</sub>)<sub>2</sub>), 2.83 (sept,  $^3J_{\text{H-H}} = 6.8$  Hz, 1 H, *o*-CH(CH<sub>3</sub>)<sub>2</sub>), 2.58 (sept,  $^3J_{\text{H-H}} = 6.8$  Hz, 1 H, *o*-CH(CH<sub>3</sub>)<sub>2</sub>), 1.57 (d,  $^3J_{\text{H-H}} = 6.6$  Hz, 3 H, *o*-CH(CH<sub>3</sub>)<sub>2</sub>), 1.43 (d,  $^3J_{\text{H-H}} = 6.6$  Hz, 3 H, *o*-CH(CH<sub>3</sub>)<sub>2</sub>), 1.40 – 1.32 (m, 15 H, 3  $\times$  *o*-CH(CH<sub>3</sub>)<sub>2</sub>, 12  $\times$  *p*-CH(CH<sub>3</sub>)<sub>2</sub>), 1.17 (d,  $^3J_{\text{H-H}} = 6.6$  Hz, 3 H, *o*-CH(CH<sub>3</sub>)<sub>2</sub>), 1.10 (d,  $^3J_{\text{H-H}} = 6.7$  Hz, 3 H, *o*-CH(CH<sub>3</sub>)<sub>2</sub>), 0.96 (d,  $^3J_{\text{H-H}} = 6.7$  Hz, 3 H, *o*-CH(CH<sub>3</sub>)<sub>2</sub>), 0.58 (d,  $^3J_{\text{H-H}} = 6.6$  Hz, 3 H, *o*-CH(CH<sub>3</sub>)<sub>2</sub>), 0.44 (d,  $^3J_{\text{H-H}} = 6.8$  Hz, 3 H, *o*-CH(CH<sub>3</sub>)<sub>2</sub>).  $^{13}\text{C}\{^1\text{H}\}$ -NMR (150.90 MHz, 253.0 K, toluene- $d_8$ ):  $\delta$  (ppm) = 156.7 (d,  $^2J_{31\text{P}-13\text{C}} = 20.0$  Hz, C-1), 148.7 (s, *o*-C<sub>6</sub>H<sub>3</sub>), 147.8 (s, *o*-C<sub>6</sub>H<sub>2</sub>), 147.1 (s, *p*-C<sub>6</sub>H<sub>2</sub>), 147.0 (s, *p*-C<sub>6</sub>H<sub>2</sub>), 146.9 (s, *o*-C<sub>6</sub>H<sub>2</sub>), 146.2 (s, *o*-C<sub>6</sub>H<sub>3</sub>), 144.5 (s, *o*-C<sub>6</sub>H<sub>2</sub>), 144.4 (s, *o*-C<sub>6</sub>H<sub>2</sub>), 138.6 (s, *i*-C<sub>6</sub>H<sub>2</sub>), 137.7 (br, *i*-BC<sub>6</sub>H<sub>5</sub>), 137.3 (s, *i*-C<sub>6</sub>H<sub>2</sub>), 136.8 (d,  $^3J_{31\text{P}-13\text{C}} = 4.6$  Hz, *o*-BC<sub>6</sub>H<sub>5</sub>), 135.5 (d,  $^3J_{31\text{P}-13\text{C}} = 5.9$  Hz, *i*-C<sub>6</sub>H<sub>3</sub>), 133.5 (d,  $^3J_{31\text{P}-13\text{C}} = 12.5$  Hz, C-6), 133.1 (d,  $^3J_{31\text{P}-13\text{C}} = 4.6$  Hz, C-4), 132.7 (d,  $^2J_{31\text{P}-13\text{C}} = 7.4$  Hz, *o*-PC<sub>6</sub>H<sub>5</sub>), 132.2 (d,  $^2J_{31\text{P}-13\text{C}} = 9.2$  Hz, *o*-PC<sub>6</sub>H<sub>5</sub>), 131.6 (d,  $^1J_{31\text{P}-13\text{C}} = 82.5$  Hz, C-2), 129.9 (s, *p*-PC<sub>6</sub>H<sub>5</sub>), 129.7 (s, *m*-C<sub>6</sub>H<sub>3</sub>), 129.5 (s, *p*-PC<sub>6</sub>H<sub>5</sub>), 128.8 (s, C-5), 128.7 (d,  $^1J_{31\text{P}-13\text{C}} = 45.9$  Hz, *i*-PC<sub>6</sub>H<sub>5</sub>), 128.1 (s, *m*-C<sub>6</sub>H<sub>3</sub>), 127.7 (s, *p*-C<sub>6</sub>H<sub>3</sub>, overlapping solvent signal, found and identified by HMBC and  $^{13}\text{C}$ -DEPT experiments), 127.4 (d,  $^3J_{31\text{P}-13\text{C}} = 9.4$  Hz, *m*-PC<sub>6</sub>H<sub>5</sub>), 127.3 – 127.1 (m, *m*-PC<sub>6</sub>H<sub>5</sub>), 126.8 (d,  $^2J_{31\text{P}-13\text{C}} = 8.7$  Hz, C-3, partly overlapping solvent signal), 126.0 (s, *m*-BC<sub>6</sub>H<sub>5</sub>), 125.0 (s, *p*-BC<sub>6</sub>H<sub>5</sub>), 123.7 (d,  $^1J_{31\text{P}-13\text{C}} = 67.9$  Hz, *i*-PC<sub>6</sub>H<sub>5</sub>, partly overlapping solvent signal), 120.4 (s, *m*-C<sub>6</sub>H<sub>2</sub>), 120.3 (s, *m*-C<sub>6</sub>H<sub>2</sub>), 119.8 (s, *m*-C<sub>6</sub>H<sub>2</sub>), 119.4 (s, *m*-C<sub>6</sub>H<sub>2</sub>), 34.3 (s, *p*-CH(CH<sub>3</sub>)<sub>2</sub>), 34.0 (s, *p*-CH(CH<sub>3</sub>)<sub>2</sub>), 30.5 (s, *o*-CH(CH<sub>3</sub>)<sub>2</sub>), 30.5 (s, *o*-CH(CH<sub>3</sub>)<sub>2</sub>), 30.0 (s, *o*-CH(CH<sub>3</sub>)<sub>2</sub>), 29.8 (*o*-CH(CH<sub>3</sub>)<sub>2</sub>), 26.6 (s, *o*-CH(CH<sub>3</sub>)<sub>2</sub>), 25.6 (s, *o*-CH(CH<sub>3</sub>)<sub>2</sub>), 25.1 (s, *p*-CH(CH<sub>3</sub>)<sub>2</sub>), 25.0 (s, *o*-CH(CH<sub>3</sub>)<sub>2</sub>), 24.3 (s, *o*-CH(CH<sub>3</sub>)<sub>2</sub>), 24.1 (s, *o*-CH(CH<sub>3</sub>)<sub>2</sub>), 23.7 (s, *p*-CH(CH<sub>3</sub>)<sub>2</sub>), 23.4 (s, *p*-CH(CH<sub>3</sub>)<sub>2</sub>), 22.0 (s, *p*-CH(CH<sub>3</sub>)<sub>2</sub>), 21.9 (s, *o*-CH(CH<sub>3</sub>)<sub>2</sub>), 21.8 (s, *o*-CH(CH<sub>3</sub>)<sub>2</sub>), 19.9 (s, *o*-CH(CH<sub>3</sub>)<sub>2</sub>).  $^{11}\text{B}\{^1\text{H}\}$ -NMR (192.55 MHz, 253.0 K, toluene- $d_8$ ):  $\delta$  (ppm) = –18.1 (br).  $^{31}\text{P}\{^1\text{H}\}$ -NMR (242.94 MHz, 253.0 K, toluene- $d_8$ ):  $\delta$  (ppm) = 6.5 (s).  $^{77}\text{Se}\{^1\text{H}\}$ -NMR (57.23 MHz, 298.0 K, C<sub>6</sub>D<sub>6</sub>):  $\delta$  (ppm) = –386.7 (br). **Elemental analysis:** Calculated (%) for C<sub>60</sub>H<sub>68</sub>BGePSe: 73.35 C, 6.98 H. Found: 73.94 C, 7.35 H.

**8:** **1b** (37.5 mg, 41.4  $\mu\text{mol}$ , 1 eq.) was dissolved in C<sub>6</sub>D<sub>6</sub> (0.6 mL) and transferred to a J. Young NMR tube. Using the “freeze-pump-thaw”-technique, the Argon atmosphere was removed and then replaced by CO<sub>2</sub>. (1 atm.) Full conversion was confirmed by NMR spectroscopy after 1.5 h. During this time, the color of the solution changed from intense red to colorless. The solution was transferred to a vial and frozen by cooling to –40 °C. The solvent was removed by sublimation under reduced pressure and a colorless powder of **8** (39.0 mg, 41.0  $\mu\text{mol}$ , 99 %) was obtained. Single crystals suitable for X-Ray diffraction were

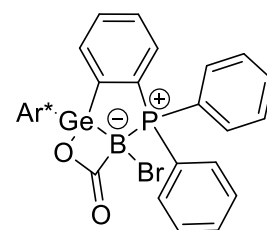

obtained from a concentrated solution of **8** in benzene at room temperature.  $^1\text{H-NMR}$  (400.11 MHz, 300.2 K, C<sub>6</sub>D<sub>6</sub>):  $\delta$  (ppm) = 7.76 – 7.68 (m, 1 H, H-6), 7.38 – 7.30 (m, 4 H, 2  $\times$  *m*-C<sub>6</sub>H<sub>3</sub>, 2  $\times$  *o*-C<sub>6</sub>H<sub>5</sub>), 7.26 – 7.21 (m, 3 H, *m*-C<sub>6</sub>H<sub>2</sub>, *p*-C<sub>6</sub>H<sub>3</sub>), 7.14 – 7.12 (m, 2 H, *m*-C<sub>6</sub>H<sub>2</sub>, partly overlapped by solvent signal), 7.09 – 7.04 (m, 1 H, H-5), 7.04 – 6.92 (m, 6 H, H-3, *p*-C<sub>6</sub>H<sub>5</sub>, 2  $\times$  *m*-C<sub>6</sub>H<sub>5</sub>, 2  $\times$  *o*-C<sub>6</sub>H<sub>5</sub>), 6.88 – 6.82 (m, 1 H, *p*-C<sub>6</sub>H<sub>5</sub>), 6.82 – 6.75 (m, 1 H, H-4), 6.72 – 6.64 (m, 2 H, *m*-C<sub>6</sub>H<sub>5</sub>), 3.25 – 3.08 (m, 4 H, *o*-CH(CH<sub>3</sub>)<sub>2</sub>), 2.78 (sept, 2 H,

$^3J_{\text{H-H}} = 6.9$  Hz,  $p\text{-CH}(\text{CH}_3)_2$ , 1.47 (d, 6 H,  $^3J_{\text{H-H}} = 6.7$  Hz,  $o\text{-CH}(\text{CH}_3)_2$ ), 1.26 – 1.21 (m, 12 H,  $o\text{-CH}(\text{CH}_3)_2$ ,  $p\text{-CH}(\text{CH}_3)_2$ ), 1.19 (d, 6 H,  $^3J_{\text{H-H}} = 6.9$  Hz,  $p\text{-CH}(\text{CH}_3)_2$ ), 1.10 (d, 6 H,  $^3J_{\text{H-H}} = 6.7$  Hz,  $o\text{-CH}(\text{CH}_3)_2$ ), 0.97 (d, 6 H,  $^3J_{\text{H-H}} = 6.8$  Hz,  $o\text{-CH}(\text{CH}_3)_2$ ).  **$^{13}\text{C}\{^1\text{H}\}$ -NMR** (100.62 MHz, 299.2 K,  $\text{C}_6\text{D}_6$ ):  $\delta$  (ppm) = 184.2 (br, O=C=O, only detectable when using  $^{13}\text{CO}_2$  as reagent), 153.6 (d,  $^2J_{31\text{P}-13\text{C}} = 25.5$  Hz, C-1), 148.4 (s,  $p\text{-C}_6\text{H}_2$ ), 147.4 (s,  $o\text{-C}_6\text{H}_3$ ), 146.7 (s,  $o\text{-C}_6\text{H}_2$ ), 146.5 (s,  $o\text{-C}_6\text{H}_2$ ), 137.1 (d,  $^3J_{31\text{P}-13\text{C}} = 8.2$  Hz,  $i\text{-C}_6\text{H}_3$ ), 136.6 (s,  $i\text{-C}_6\text{H}_2$ ), 134.3 (d,  $^3J_{31\text{P}-13\text{C}} = 14.3$  Hz, C-6), 133.8 (d,  $^3J_{31\text{P}-13\text{C}} = 9.3$  Hz,  $m\text{-C}_6\text{H}_5$ ), 133.7 (d,  $^2J_{31\text{P}-13\text{C}} = 6.7$  Hz, C-3), 133.4 (d,  $^2J_{31\text{P}-13\text{C}} = 9.7$  Hz,  $o\text{-C}_6\text{H}_5$ ), 133.1 (d,  $^1J_{31\text{P}-13\text{C}} = 71.9$  Hz, C-2), 131.9 (d,  $^4J_{31\text{P}-13\text{C}} = 2.3$  Hz,  $p\text{-C}_6\text{H}_5$ ), 131.5 – 131.2 (m, C-5,  $p\text{-C}_6\text{H}_5$ ), 130.5 (s,  $m\text{-C}_6\text{H}_3$ ), 129.8 (d,  $^3J_{31\text{P}-13\text{C}} = 4.4$  Hz, C-4), 128.9 (d,  $^3J_{31\text{P}-13\text{C}} = 11.5$  Hz,  $m\text{-C}_6\text{H}_5$ ), 128.8 (s,  $p\text{-C}_6\text{H}_3$ ), 128.3 (d,  $^2J_{31\text{P}-13\text{C}} = 11.5$  Hz,  $o\text{-C}_6\text{H}_5$ ), 126.7 (d,  $^1J_{31\text{P}-13\text{C}} = 66.8$  Hz,  $i\text{-C}_6\text{H}_5$ ), 121.4 (s,  $m\text{-C}_6\text{H}_2$ ), 121.1 (d,  $^1J_{31\text{P}-13\text{C}} = 63.8$  Hz,  $i\text{-C}_6\text{H}_5$ ), 120.9 (s,  $m\text{-C}_6\text{H}_2$ ), 34.5 (s,  $p\text{-CH}(\text{CH}_3)_2$ ), 31.3 (s,  $o\text{-CH}(\text{CH}_3)_2$ ), 31.1 (s,  $o\text{-CH}(\text{CH}_3)_2$ ), 26.2 (s,  $p\text{-CH}(\text{CH}_3)_2$ ), 26.0 (s,  $o\text{-CH}(\text{CH}_3)_2$ ), 24.5 (s,  $o\text{-CH}(\text{CH}_3)_2$ ), 24.0 (s,  $o\text{-CH}(\text{CH}_3)_2$ ), 23.3 (s,  $p\text{-CH}(\text{CH}_3)_2$ ), 21.9 (s,  $o\text{-CH}(\text{CH}_3)_2$ ).  **$^{11}\text{B}\{^1\text{H}\}$ -NMR** (128.37 MHz, 299.2 K,  $\text{C}_6\text{D}_6$ ):  $\delta$  (ppm) = -12.9 (br).  **$^{31}\text{P}\{^1\text{H}\}$ -NMR** (161.97 MHz, 299.2 K,  $\text{C}_6\text{D}_6$ ):  $\delta$  (ppm) = 14.5 (br). **Elemental analysis:** Calculated (%) for  $\text{C}_{55}\text{H}_{63}\text{BBrGePO}_2$ : 71.24 C, 6.76 H. Found: 71.23 C, 6.90 H. **IR (KBr):** 1700  $\text{cm}^{-1}$  ( $\nu$  C=O).

**9:** 2,3-Dimethylbuta-1,3-diene (0.02 mL, 178  $\mu\text{mol}$ , 2.87 eq.) was added to a solution of **1b** (56.2 mg, 62  $\mu\text{mol}$ , 1 eq.) in benzene (2 mL). The reaction mixture was stirred at room temperature for 27.5 h. During the reaction, the intense red solution decolorizes. The solvent was removed under reduced pressure. The crude product was subsequently purified by precipitation from a cooled solution in *n*-pentane (2 mL, -40 °C). The mother liquor was removed by using a syringe and the colorless precipitate was dried under reduced pressure. A colorless solid of **9** was obtained. (38.9 mg, 39.4  $\mu\text{mol}$ , 64 %). Slow evaporation of a solution of **9** in *n*-pentane afforded at room temperature single crystals suitable for X-Ray diffraction.  **$^1\text{H}$ -NMR**

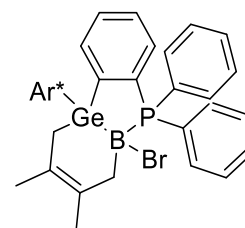

(400.11 MHz, 299.2 K,  $\text{C}_6\text{D}_6$ ): 7.46 – 7.33 (m, 3 H, H-6,  $o\text{-C}_6\text{H}_5$ ), 7.27 – 7.15 (m, 8 H,  $m\text{-C}_6\text{H}_2$ ,  $m\text{-C}_6\text{H}_3$ ,  $o\text{-C}_6\text{H}_5$ ), 7.13 – 7.08 (m, 1 H,  $p\text{-C}_6\text{H}_3$ ), 7.08 – 6.99 (m, 4 H, H-5,  $p\text{-C}_6\text{H}_5$ ,  $m\text{-C}_6\text{H}_5$ ), 6.99 – 6.94 (m, 1 H, H-3), 6.92 – 6.77 (m, 4 H, H-4,  $p\text{-C}_6\text{H}_5$ ,  $m\text{-C}_6\text{H}_5$ ), 3.35 (sept, 2 H,  $^3J_{\text{H-H}} = 6.8$  Hz,  $o\text{-CH}(\text{CH}_3)_2$ ), 3.11 (sept, 2 H,  $^3J_{\text{H-H}} = 6.8$  Hz,  $o\text{-CH}(\text{CH}_3)_2$ ), 2.90 (sept, 2 H,  $^3J_{\text{H-H}} = 6.9$  Hz,  $p\text{-CH}(\text{CH}_3)_2$ ), 2.76 – 2.53 (m, 1 H,  $\text{BCH}_2$ ), 2.17 – 1.98 (m, 1 H,  $\text{BCH}_2$ ), 1.38 (d, 6 H,  $^3J_{\text{H-H}} = 6.9$  Hz,  $o\text{-CH}(\text{CH}_3)_2$ ), 1.35 – 1.23 (m, 13 H,  $p\text{-CH}(\text{CH}_3)_2$ ,  $\text{GeCH}_2$ ), 1.22 – 1.12 (m, 12 H,  $o\text{-CH}(\text{CH}_3)_2$ ); 1.12 – 0.90 (m, 10 H,  $o\text{-CH}(\text{CH}_3)_2$ ,  $\text{GeCH}_2$ ,  $\text{GeCH}_2\text{-CH}_3$ ), 0.86 (s, 3 H,  $\text{BCH}_2\text{-CH}_3$ ).  **$^{13}\text{C}\{^1\text{H}\}$ -NMR** (100.61 MHz, 299.2 K,  $\text{C}_6\text{D}_6$ ):  $\delta$  (ppm) = 159.9 (d,  $^2J_{31\text{P}-13\text{C}} = 32.4$  Hz, C-1), 148.3 (s,  $o\text{-C}_6\text{H}_3$ ), 147.8 (s,  $p\text{-C}_6\text{H}_2$ ), 146.7 (s,  $o\text{-C}_6\text{H}_2$ ), 146.2 (s,  $o\text{-C}_6\text{H}_2$ ), 141.3 (d,  $^3J_{31\text{P}-13\text{C}} = 13.5$  Hz,  $i\text{-C}_6\text{H}_3$ ), 140.9 (s,  $i\text{-C}_6\text{H}_2$ ), 135.3 (d,  $^3J_{31\text{P}-13\text{C}} = 14.6$  Hz, C-6), 134.9 (d,  $^2J_{31\text{P}-13\text{C}} = 8.0$  Hz,  $o\text{-C}_6\text{H}_5$ ), 133.4 (d,  $^3J_{31\text{P}-13\text{C}} = 8.5$  Hz,  $m\text{-C}_6\text{H}_5$ ), 132.9 (d,  $^2J_{31\text{P}-13\text{C}} = 5.3$  Hz, C-3), 132.3 (d,  $^1J_{31\text{P}-13\text{C}} = 70.9$  Hz, C-1), 131.8 (s,  $m\text{-C}_6\text{H}_3$ ), 130.5 (d,  $^4J_{31\text{P}-13\text{C}} = 2.4$  Hz, C-5), 130.4 (br s,  $p\text{-C}_6\text{H}_5$ ), 129.6 (d,  $^1J_{\text{P-C}} = 56.4$  Hz,  $i\text{-C}_6\text{H}_5$ ), 128.5 (s, C=C), 127.7 (d,  $^2J_{31\text{P}-13\text{C}} = 9.8$  Hz,  $o\text{-C}_6\text{H}_5$ , overlapping solvent signal), 127.6 (d,  $^3J_{31\text{P}-13\text{C}} = 10.4$  Hz,  $m\text{-C}_6\text{H}_5$ , overlapping solvent signal), 127.4 (d,  $^3J_{31\text{P}-13\text{C}} = 7.9$  Hz, C-4, overlapping solvent signal), 126.4 (s,  $p\text{-C}_6\text{H}_3$ ), 126.3 (d,  $^1J_{31\text{P}-13\text{C}} = 50.9$  Hz,  $i\text{-C}_6\text{H}_5$ ), 126.0 (s, C=C), 121.4 (s,  $m\text{-C}_6\text{H}_2$ ), 121.4 (s,  $m\text{-C}_6\text{H}_2$ ), 34.6 (s,  $p\text{-CH}(\text{CH}_3)_2$ ), 34.4 (br,  $\text{BCH}_2$ ), 31.1 (s,  $o\text{-CH}(\text{CH}_3)_2$ ), 31.0 (s,  $o\text{-CH}(\text{CH}_3)_2$ ), 27.1 ( $\text{Ge-CH}_2$ ), 26.0 (s,  $o\text{-CH}(\text{CH}_3)_2$ ), 25.7 (s,  $o\text{-CH}(\text{CH}_3)_2$ ), 24.5 ( $p\text{-CH}(\text{CH}_3)_2$ ), 23.9 (s,  $p\text{-CH}(\text{CH}_3)_2$ ), 23.5 (s,  $o\text{-CH}(\text{CH}_3)_2$ ), 22.9 (s,  $\text{GeCH}_2\text{-CH}_3$ ), 22.7 (s,  $o\text{-CH}(\text{CH}_3)_2$ ), 22.4 ( $\text{BCH}_2\text{-CH}_3$ ).  **$^{11}\text{B}\{^1\text{H}\}$ -NMR** (128.37 MHz, 299.2 K,  $\text{C}_6\text{D}_6$ ):  $\delta$  (ppm) = -9.7 (br).  **$^{31}\text{P}\{^1\text{H}\}$ -NMR** (161.97 MHz, 299.2 K,  $\text{C}_6\text{D}_6$ ):  $\delta$  (ppm) = 14.6 (s). **Elemental analysis:** Calculated (%) for  $\text{C}_{60}\text{H}_{73}\text{BBrGeP}$ : 72.90 C, 7.44 H. Found: 73.18 C, 7.55 H.



**10: 1b** (92 mg, 102  $\mu\text{mol}$ , 1 eq.) was dissolved in toluene (2 mL) and added to  $\text{Fe}_2(\text{CO})_9$  (36.9 mg, 102  $\mu\text{mol}$ , 1 eq.). The resulting solution was stirred for four hours at room temperature. During the reaction, the color of the solution changed from intense red to red-brown. The crude product was obtained in the form of yellow crystals after filtration and subsequent concentration of the filtrate almost to dryness. The mother liquor was removed, and the crystals were washed with *n*-pentane (3  $\times$  1 mL). To remove residual amounts of solvent, the crystals were dissolved in benzene (4.5 mL), cooled to  $-40^\circ\text{C}$  and the frozen solvent was removed by sublimation under reduced pressure. A yellow powder of **10** (81.8 mg, 76.1  $\mu\text{mol}$ , 75 %) was obtained. Single crystals suitable for X-Ray diffraction were obtained from a concentrated solution of **10** in toluene at room temperature.

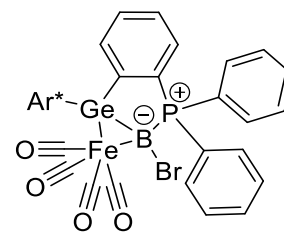

$^1\text{H-NMR}$  (400.11 MHz, 300.2 K,  $\text{C}_6\text{D}_6$ ):  $\delta$  (ppm) = 7.72 – 7.63 (m, 2 H, *o*- $\text{C}_6\text{H}_5$ ), 7.58 – 7.52 (m, 1 H, *m*- $\text{C}_6\text{H}_2$ ), 7.52 – 7.46 (m, 1 H, H-6), 7.32 – 7.27 (m, 2 H, *m*- $\text{C}_6\text{H}_2$ ), 7.26 – 7.22 (m, 2 H, *m*- $\text{C}_6\text{H}_3$ ), 7.17 – 7.13 (m, 1 H, *m*- $\text{C}_6\text{H}_2$ , overlapping solvent signal), 7.13 – 7.06 (m, 4 H, *p*- $\text{C}_6\text{H}_3$ , *p*- $\text{C}_6\text{H}_5$ , *m*- $\text{C}_6\text{H}_5$ ), 7.06 – 6.94 (m, 5 H, *p*- $\text{C}_6\text{H}_5$ , *o*- $\text{C}_6\text{H}_5$ , *m*- $\text{C}_6\text{H}_5$ ), 6.93-6.85 (m, 2 H, H-3, H-5), 6.74 – 6.67 (m, 1 H, H-4), 3.67 – 3.52 (m, 2 H, *o*- $\text{CH}(\text{CH}_3)_2$ ), 3.19 (sept, 1 H,  $^3J_{\text{H-H}} = 6.6$  Hz, *o*- $\text{CH}(\text{CH}_3)_2$ ), 3.03 (sept, 1 H,  $^3J_{\text{H-H}} = 6.9$  Hz, *p*- $\text{CH}(\text{CH}_3)_2$ ), 2.91 (sept, 1 H,  $^3J_{\text{H-H}} = 6.9$  Hz, *p*- $\text{CH}(\text{CH}_3)_2$ ), 2.83 (sept, 1 H,  $^3J_{\text{H-H}} = 6.8$  Hz, *o*- $\text{CH}(\text{CH}_3)_2$ ), 1.78 (d, 3 H,  $^3J_{\text{H-H}} = 6.7$  Hz, *o*- $\text{CH}(\text{CH}_3)_2$ ), 1.54 (d, 3 H,  $^3J_{\text{H-H}} = 6.7$  Hz, *o*- $\text{CH}(\text{CH}_3)_2$ ), 1.43 (d, 3 H,  $^3J_{\text{H-H}} = 6.9$  Hz, *p*- $\text{CH}(\text{CH}_3)_2$ ), 1.38 – 1.31 (m, 4 H, 3  $\times$  *p*- $\text{CH}(\text{CH}_3)_2$ , 1  $\times$  *o*- $\text{CH}(\text{CH}_3)_2$ ), 1.29 (d, 3 H,  $^3J_{\text{H-H}} = 6.7$  Hz, *o*- $\text{CH}(\text{CH}_3)_2$ ), 1.23 (d, 3 H,  $^3J_{\text{H-H}} = 6.7$  Hz, *o*- $\text{CH}(\text{CH}_3)_2$ ), 1.03 (d, 3 H,  $^3J_{\text{H-H}} = 6.6$  Hz, *o*- $\text{CH}(\text{CH}_3)_2$ ), 0.95 (d, 3 H,  $^3J_{\text{H-H}} = 6.7$  Hz, *o*- $\text{CH}(\text{CH}_3)_2$ ),  $-0.09$  (d, 3 H,  $^3J_{\text{H-H}} = 6.8$  Hz, *o*- $\text{CH}(\text{CH}_3)_2$ ).  $^{13}\text{C}\{^1\text{H}\}$ -NMR (100.62 MHz, 299.2 K,  $\text{C}_6\text{D}_6$ ):  $\delta$  (ppm) = 212.5 (d,  $J = 4.0$  Hz, CO), 210.6 (br q, CO), 209.7 (br s, CO), 208.6 (br s, CO), 156.8 (d,  $^3J_{31\text{P}-13\text{C}} = 24.4$  Hz, C-1), 148.8 (s, *o*- $\text{C}_6\text{H}_3$ ), 148.3 (s, *p*- $\text{C}_6\text{H}_2$ ), 147.8 (s, *o*- $\text{C}_6\text{H}_2$ ), 147.6 (s, *p*- $\text{C}_6\text{H}_2$ ), 147.0 (s, *o*- $\text{C}_6\text{H}_3$ ), 146.9 (s, *o*- $\text{C}_6\text{H}_2$ ), 146.1 (s, *o*- $\text{C}_6\text{H}_2$ ), 145.7 (s, *o*- $\text{C}_6\text{H}_2$ ), 140.3 (s, *i*- $\text{C}_6\text{H}_2$ ), 138.6 (s, *i*- $\text{C}_6\text{H}_2$ ), 137.8 (d,  $^3J_{31\text{P}-13\text{C}} = 8.7$  Hz, *i*- $\text{C}_6\text{H}_3$ ), 136.5 (d,  $^3J_{31\text{P}-13\text{C}} = 13.5$  Hz, C-6), 134.2 (d,  $^2J_{31\text{P}-13\text{C}} = 9.4$  Hz, *o*- $\text{C}_6\text{H}_5$ ), 133.8 (s, *m*- $\text{C}_6\text{H}_3$ ), 133.2 – 132.8 (m, C-3, *o*- $\text{C}_6\text{H}_5$ ), 131.7 – 131.4 (m, *m*- $\text{C}_6\text{H}_3$ , *p*- $\text{C}_6\text{H}_5$ ), 131.2 (d,  $^4J_{31\text{P}-13\text{C}} = 2.1$  Hz, C-5), 130.9 (d,  $^4J_{31\text{P}-13\text{C}} = 2.0$  Hz, *p*- $\text{C}_6\text{H}_5$ ), 129.2 (d,  $^1J_{31\text{P}-13\text{C}} = 62.0$  Hz, C-2), 128.6 (d,  $^1J_{31\text{P}-13\text{C}} = 61.6$  Hz, *i*- $\text{C}_6\text{H}_5$ ), 128.4 (d,  $^3J_{31\text{P}-13\text{C}} = 10.9$  Hz, *m*- $\text{C}_6\text{H}_5$ ), 127.7 (d,  $^3J_{31\text{P}-13\text{C}} = 8.5$  Hz, C-4 overlapping solvent signal), 127.0 (s, *p*- $\text{C}_6\text{H}_3$ ), 125.2 (d,  $^1J_{31\text{P}-13\text{C}} = 67.4$  Hz, *i*- $\text{C}_6\text{H}_5$ ), 122.7 (s, *m*- $\text{C}_6\text{H}_2$ ), 121.7 (s, *m*- $\text{C}_6\text{H}_2$ ), 121.4 (s, *m*- $\text{C}_6\text{H}_2$ ), 120.8 (s, *m*- $\text{C}_6\text{H}_2$ ), 35.0 (s, *p*- $\text{CH}(\text{CH}_3)_2$ ), 34.3 (s, *p*- $\text{CH}(\text{CH}_3)_2$ ), 31.4 (s, *o*- $\text{CH}(\text{CH}_3)_2$ ), 31.2 (s, *o*- $\text{CH}(\text{CH}_3)_2$ ), 30.7 (s, *o*- $\text{CH}(\text{CH}_3)_2$ ), 2  $\times$  26.6 (s, *o*- $\text{CH}(\text{CH}_3)_2$ ), 25.9 (s, *o*- $\text{CH}(\text{CH}_3)_2$ ), 25.7 (s, *p*- $\text{CH}(\text{CH}_3)_2$ ), 25.2 (s, *o*- $\text{CH}(\text{CH}_3)_2$ ), 24.0 (s, *o*- $\text{CH}(\text{CH}_3)_2$ ), 23.9 (s, *p*- $\text{CH}(\text{CH}_3)_2$ ), 23.6 (s, *p*- $\text{CH}(\text{CH}_3)_2$ ), 23.4 (s, *o*- $\text{CH}(\text{CH}_3)_2$ ), 22.9 (s, *o*- $\text{CH}(\text{CH}_3)_2$ ), 22.5 (s, *o*- $\text{CH}(\text{CH}_3)_2$ ), 22.4 (*p*- $\text{CH}(\text{CH}_3)_2$ ).  $^{31}\text{P}\{^1\text{H}\}$ -NMR (161.97 MHz, 300.2 K,  $\text{C}_6\text{D}_6$ ):  $\delta$  (ppm) = 18.6 (broad unresolved q).  $^{11}\text{B}\{^1\text{H}\}$ -NMR (128.37 MHz, 300.2 K,  $\text{C}_6\text{D}_6$ ):  $\delta$  (ppm) =  $-13.5$  (d,  $^1J_{31\text{P}-11\text{B}} = 86.5$  Hz). **Elemental analysis:** Calculated (%) for  $\text{C}_{58}\text{H}_{63}\text{BBrFeO}_4\text{GeP}\cdot\text{C}_7\text{H}_8$ : 66.93 C, 6.14 H. Found: 66.37 C, 6.03 H. **IR (KBr):** 2051  $\text{cm}^{-1}$ , 1983  $\text{cm}^{-1}$ , 1960  $\text{cm}^{-1}$  ( $\nu$  C=O).

**11: 1b** (79.2 mg, 87.4  $\mu\text{mol}$ , 1 eq.) and  $\text{CuBr}\cdot\text{SMe}_2$  (18.0 mg, 87.4  $\mu\text{mol}$ , 1 eq.) were combined and stirred thoroughly to ensure good homogeneity. The resulting solid mixture was suspended in benzene (2 mL) and stirred at room temperature. During the reaction, color of the mixture changes from intense red to yellow. After 1 h, the reaction mixture was filtered, and the solvent was removed from the filtrate under reduced pressure. Residual solvent was removed by co-evaporation with *n*-pentane (2  $\times$  2 mL). The crude product was dissolved in *o*-difluorobenzene (1 mL) and crystallized by vapor diffusion of *n*-pentane (3 mL) into the solution at room temperature. After 2 days, the mother liquor was removed, and the resulting orange crystals of **11** were washed with *n*-pentane (2  $\times$  2 mL). After removal of residual solvent under reduced pressure, an orange, crystalline solid of **11** (49.0 mg, 46.7  $\mu\text{mol}$ , 53.4 %) was obtained. Additional product was obtained by crystallization from the mixture of mother liquor and the wash solution (total yield: 71.5 mg, 68.1  $\mu\text{mol}$ , 78 %). The crystals obtained from the first crystallization were suitable for X-Ray

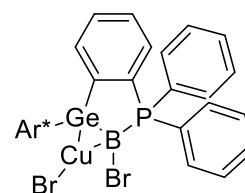

diffraction.  $^1\text{H-NMR}$  (400.11 MHz, 300.2 K,  $\text{C}_6\text{D}_6$ ):  $\delta$  (ppm) = 7.81 – 7.71 (m, 2 H,  $o\text{-PC}_6\text{H}_5$ ), 7.50 – 7.42 (m, 1 H, H-6), 7.28 – 7.24 (m, 2 H,  $m\text{-C}_6\text{H}_2$ ), 7.24 – 7.15 (m, 6 H,  $m\text{-C}_6\text{H}_2$ ,  $m\text{-C}_6\text{H}_3$ ,  $o\text{-C}_6\text{H}_5$ ), 7.14 – 7.09 (m, 1 H,  $p\text{-C}_6\text{H}_3$ ), 7.09 – 7.03 (m, 1 H,  $p\text{-PC}_6\text{H}_5$ ), 7.03 – 6.95 (m, 6 H, H-5,  $p\text{-C}_6\text{H}_5$ ,  $m\text{-C}_6\text{H}_5$ ), 6.92 – 6.85 (m, 1 H, H-3), 6.73 – 6.65 (m, 1 H, H-4), 3.19 (sept, 2 H,  $^3J_{\text{H-H}} = 6.8$  Hz,  $o\text{-CH}(\text{CH}_3)_2$ ), 3.09 (sept, 2 H,  $^3J_{\text{H-H}} = 6.8$  Hz,  $o\text{-CH}(\text{CH}_3)_2$ ), 3.03 (sept., 2 H,  $^3J_{\text{H-H}} = 6.8$  Hz,  $p\text{-CH}(\text{CH}_3)_2$ ), 1.44 – 1.31 (m, 18 H,  $12 \times p\text{-CH}(\text{CH}_3)_2$ ,  $6 \times o\text{-CH}(\text{CH}_3)_2$ ), 1.22 – 1.03 (m, 18 H,  $o\text{-CH}(\text{CH}_3)_2$ ).  $^{13}\text{C}\{^1\text{H}\}\text{-NMR}$  (100.62 MHz, 300.2 K,  $\text{C}_6\text{D}_6$ ):  $\delta$  (ppm) = 149.8 (br, C-1), 149.6 (s,  $p\text{-C}_6\text{H}_2$ ), 147.4 (s,  $o\text{-C}_6\text{H}_3$ ), 146.7 (s,  $o\text{-C}_6\text{H}_2$ ), 145.9 (s,  $o\text{-C}_6\text{H}_2$ ), 138.3 (d,  $^3J_{31\text{P-13C}} = 18.3$  Hz,  $i\text{-C}_6\text{H}_3$ ), 137.0 (s,  $i\text{-C}_6\text{H}_2$ ), 134.4 (d,  $^2J_{31\text{P-13C}} = 9.8$  Hz,  $o\text{-PC}_6\text{H}_5$ ), 133.7 (d,  $^3J_{31\text{P-13C}} = 13.0$  Hz, C-6), 132.7 – 132.4 (m,  $o\text{-PC}_6\text{H}_5$ , C-5), 132.4 (d,  $^1J_{31\text{P-13C}} = 80.9$  Hz, C-2), 132.3 (d,  $^4J_{31\text{P-13C}} = 2.5$  Hz,  $p\text{-PC}_6\text{H}_5$ ), 131.4 (d,  $^4J_{31\text{P-13C}} = 2.2$  Hz,  $p\text{-PC}_6\text{H}_5$ ), 131.1 (d,  $^2J_{31\text{P-13C}} = 6.7$  Hz, C-3), 130.5 (s,  $m\text{-C}_6\text{H}_3$ ), 129.2 – 128.9 (m,  $m\text{-C}_6\text{H}_5$ ,  $p\text{-C}_6\text{H}_3$ ), 128.7 (d,  $^3J_{31\text{P-13C}} = 11.5$  Hz,  $m\text{-C}_6\text{H}_5$ ), 127.7 (d,  $^2J_{31\text{P-13C}} = 9.2$  Hz, C-4, overlapping solvent signal), 127.2 (d,  $^1J_{31\text{P-13C}} = 71.9$  Hz,  $i\text{-PC}_6\text{H}_5$ , overlapping solvent signal), 122.3 (d,  $^1J_{31\text{P-13C}} = 69.9$  Hz,  $i\text{-PC}_6\text{H}_5$ ), 122.1 (s,  $m\text{-C}_6\text{H}_2$ ), 122.0 (s,  $m\text{-C}_6\text{H}_2$ ), 34.2 (s,  $p\text{-CH}(\text{CH}_3)_2$ ), 31.1 (s,  $o\text{-CH}(\text{CH}_3)_2$ ), 31.0 (s,  $o\text{-CH}(\text{CH}_3)_2$ ), 25.9 (s,  $o\text{-CH}(\text{CH}_3)_2$ ), 25.7 (s,  $o\text{-CH}(\text{CH}_3)_2$ ), 24.3 (s,  $o\text{-CH}(\text{CH}_3)_2$ ), 24.1 (s,  $p\text{-CH}(\text{CH}_3)_2$ ), 23.8 ( $p\text{-CH}(\text{CH}_3)_2$ ), 23.6 ( $o\text{-CH}(\text{CH}_3)_2$ ).  $^{31}\text{P}\{^1\text{H}\}\text{-NMR}$  (161.97 MHz, 300.2 K,  $\text{C}_6\text{D}_6$ ):  $\delta$  (ppm) = 4.2 (broad unresolved q).  $^{11}\text{B}\{^1\text{H}\}\text{-NMR}$  (128.37 MHz, 300.2 K,  $\text{C}_6\text{D}_6$ ):  $\delta$  (ppm) = 2.5 (d,  $^1J_{31\text{P-11B}} = 120.3$  Hz). **Elemental analysis:** Calculated (%) for  $\text{C}_{54}\text{H}_{63}\text{BBr}_2\text{CuGeP}\cdot\text{C}_5\text{H}_{12}$ : 63.16 C, 6.74 H, found: 62.98 C, 6.45 H.

**12: 1a** (39.5 mg, 45.8  $\mu\text{mol}$ , 1 eq) was dissolved in a mixture of benzene (1.5 mL) and *n*-pentane (5 mL). A suspension of  $\text{AuCl}\cdot\text{S}(\text{CH}_3)_2$  (13.5 mg, 45.8  $\mu\text{mol}$ , 1 eq) in diethyl ether (5 mL) and benzene (1.5 mL) was added dropwise, and the resulting mixture was stirred for two hours at room temperature. During the reaction, the color of the reaction mixture changed from intense red to green and a dark colored solid precipitated. The reaction mixture was filtered and the solvent from the light-

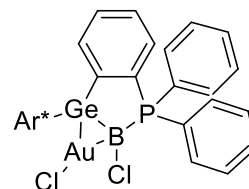

yellow filtrate was evaporated under reduced pressure. The light-yellow residue was dissolved in benzene (2 mL) and concentrated to 0.3 mL and cooled down to  $-40$   $^{\circ}\text{C}$ . Cold *n*-pentane (5 mL,  $-40$   $^{\circ}\text{C}$ ) was layered on top of the resulting frozen solution and the mixture was slowly warmed to room temperature. After two days, yellow crystals were obtained. The mother liquor was removed, and the crystals were washed with *n*-pentane (2 mL) and dried under reduced pressure. The product was obtained in the form of yellow crystals (32.8 mg, 30.0  $\mu\text{mol}$ , 65 %). By vapor diffusion of *n*-pentane in a concentrated solution of **12** in THF at  $-40$   $^{\circ}\text{C}$ , single crystals suitable for X-Ray diffraction were obtained.  $^1\text{H-NMR}$  (400.11 MHz, 300.2 K,  $\text{C}_6\text{D}_6$ ):  $\delta$  (ppm) = 7.74 – 7.64 (m, 2 H,  $o\text{-C}_6\text{H}_5$ ), 7.49 – 7.43 (m, 1 H, H-6), 7.26 – 7.21 (m, 2 H,  $m\text{-C}_6\text{H}_2$ ), 7.18 – 7.10 (m, 7 H,  $m\text{-C}_6\text{H}_3$ ,  $p\text{-C}_6\text{H}_3$ ,  $m\text{-C}_6\text{H}_2$ ,  $o\text{-C}_6\text{H}_5$ , overlapping solvent signal), 7.09 – 6.94 (m, 4 H, H-5,  $m\text{-C}_6\text{H}_5$ ,  $p\text{-C}_6\text{H}_5$ ), 6.93 – 6.87 (m, 3 H,  $m\text{-C}_6\text{H}_5$ ,  $p\text{-C}_6\text{H}_5$ ), 6.84 – 6.78 (m, 1 H, H-3), 6.73 – 6.66 (m, 1 H, H-4), 3.22 (sept., 2 H,  $^3J_{\text{H-H}} = 6.8$  Hz,  $o\text{-CH}(\text{CH}_3)_2$ ), 3.12 – 2.96 (m, 4 H,  $p\text{-CH}(\text{CH}_3)_2$ ,  $o\text{-CH}(\text{CH}_3)_2$ ), 1.41 – 1.33 (m, 18 H,  $o\text{-CH}(\text{CH}_3)_2$ ), 1.18 – 1.05 (m, 18 H,  $12 \times p\text{-CH}(\text{CH}_3)_2$ ,  $6 \times o\text{-CH}(\text{CH}_3)_2$ ).  $^{13}\text{C}\{^1\text{H}\}\text{-NMR}$  (100.61 MHz, 300.2 K,  $\text{C}_6\text{D}_6$ ):  $\delta$  (ppm) = 149.5 (s,  $o\text{-C}_6\text{H}_2$ ), 148.5 (br, C-1), 147.8 (s,  $p\text{-C}_6\text{H}_3$ ), 146.6 (s,  $o\text{-C}_6\text{H}_2$ ), 146.2 (s,  $p\text{-C}_6\text{H}_2$ ), 137.0 (s,  $i\text{-C}_6\text{H}_2$ ), 134.4 (d,  $^3J_{31\text{P-13C}} = 12.6$  Hz, C-6), 134.0 – 133.6 (m,  $o\text{-C}_6\text{H}_5$  +  $i\text{-C}_6\text{H}_3$ ), 132.9 (d,  $^2J_{31\text{P-13C}} = 9.7$  Hz,  $o\text{-C}_6\text{H}_5$ ), 132.3 – 132.1 (m, C-5 +  $p\text{-C}_6\text{H}_5$ ), 131.6 (d,  $^1J_{31\text{P-13C}} = 81.3$  Hz, C-2), 131.4 (d,  $^4J_{31\text{P-13C}} = 2.4$  Hz,  $p\text{-C}_6\text{H}_5$ ), 131.3 (d,  $^2J_{31\text{P-13C}} = 6.3$  Hz, C-3), 130.5 (s,  $m\text{-C}_6\text{H}_2$ ), 129.2 (d,  $^3J_{31\text{P-13C}} = 11.7$  Hz,  $m\text{-C}_6\text{H}_5$ ), 129.0 (s,  $p\text{-C}_6\text{H}_3$ ), 128.7 (d,  $^3J_{31\text{P-13C}} = 11.2$  Hz,  $m\text{-C}_6\text{H}_5$ ), 128.4 (d,  $^3J_{31\text{P-13C}} = 9.4$  Hz, C-4), 125.9 (d,  $^1J_{31\text{P-13C}} = 63.4$  Hz,  $i\text{-C}_6\text{H}_5$ ), 123.9 (d,  $^1J_{31\text{P-13C}} = 67.3$  Hz,  $i\text{-C}_6\text{H}_5$ ), 121.7 (s,  $m\text{-C}_6\text{H}_2$ ), 121.6 (s,  $m\text{-C}_6\text{H}_2$ ), 34.2 (s,  $p\text{-CH}(\text{CH}_3)_2$ ), 31.1 (s,  $o\text{-CH}(\text{CH}_3)_2$ ), 31.0 (s,  $o\text{-CH}(\text{CH}_3)_2$ ), 26.0 (s,  $p\text{-CH}(\text{CH}_3)_2$ ), 25.6 (s,  $o\text{-CH}(\text{CH}_3)_2$ ), 24.2 (s,  $o\text{-CH}(\text{CH}_3)_2$ ), 24.1 (s,  $o\text{-CH}(\text{CH}_3)_2$ ), 23.8 (s,  $o\text{-CH}(\text{CH}_3)_2$ ), 23.4 (s,  $p\text{-CH}(\text{CH}_3)_2$ ).  $^{31}\text{P}\{^1\text{H}\}\text{-NMR}$  (161.97 MHz, 300.2 K,  $\text{C}_6\text{D}_6$ ):  $\delta$  (ppm) = 1.0 (broad unresolved q).  $^{11}\text{B}\{^1\text{H}\}\text{-NMR}$  (128.37 MHz, 300.2 K,  $\text{C}_6\text{D}_6$ ):  $\delta$  (ppm) = 0.4 (d,  $^1J_{31\text{P-11B}} = 122.8$  Hz). **Elemental analysis:** Calculated (%) for  $\text{C}_{54}\text{H}_{63}\text{BAuCl}_2\text{GeP}$ : 59.27 C, 5.80 H. Found: 60.72 C, 6.25 H (elemental analyses of crystalline material was repeated several times leading always to large deviations).

**13**: A solution of **1b** (131.7 mg, 145  $\mu\text{mol}$ , 1 eq.) in benzene (3 mL) was added to  $[\text{Cp}^*\text{Al}]_4$  (23.6 mg, 36.3  $\mu\text{mol}$ , 0.25 eq.) followed by stirring and heating the mixture at 60 °C for 21 hours. The intense red solution changed color to dark orange during the reaction. After filtration, the solvent was evaporated under reduced pressure. The brownish residue was dissolved in *n*-pentane (2 mL). Slow evaporation of the solvent afforded red-orange crystals. Removing the mother liquor followed by washing the crystals with *n*-pentane (3  $\times$  1 mL) and subsequently removing all residual solvent under reduced pressure afforded **13** (81.3 mg, 76.1  $\mu\text{mol}$ , 52 %) in the form of a red-orange crystalline solid. Single crystals suitable for X-ray diffraction were obtained from a concentrated solution of **13** in toluene at room temperature. **<sup>1</sup>H-NMR** (400.11 MHz, 299.2 K,  $\text{C}_6\text{D}_6$ ):  $\delta$  (ppm) = 7.55 – 7.45 (m, 4 H, *o*- $\text{C}_6\text{H}_5$ ), 7.41 – 7.35 (m, 2 H, *m*- $\text{C}_6\text{H}_3$ ), 7.35 – 7.30 (m, 2 H, *m*- $\text{C}_6\text{H}_2$ ), 7.24 – 7.18 (m, 1 H, *p*- $\text{C}_6\text{H}_3$ ), 7.10 – 7.00 (m, 9 H, *m*- $\text{C}_6\text{H}_2$ , 3- $\text{C}_6\text{H}_4$ , *m*- $\text{C}_6\text{H}_5$ , *p*- $\text{C}_6\text{H}_5$ , H-3), 6.84 – 6.79 (m, 1 H, H-6), 6.78 – 6.72 (m, 1 H, H-5), 6.69 – 6.62 (m, 1 H, H-4), 3.27 (sept,  $^3J_{\text{H-H}} = 6.7$  Hz, 2 H, *o*- $\text{CH}(\text{CH}_3)_2$ ), 3.07 (sept,  $^3J_{\text{H-H}} = 6.8$  Hz, 2 H, *o*- $\text{CH}(\text{CH}_3)_2$ ), 2.94 (sept,  $^3J_{\text{H-H}} = 6.9$  Hz, 2 H, *p*- $\text{CH}(\text{CH}_3)_2$ ), 1.67 (d,  $^3J_{\text{H-H}} = 6.9$  Hz, 6 H, *o*- $\text{CH}(\text{CH}_3)_2$ ), 1.55 (s, 15 H,  $\text{C}_5(\text{CH}_3)_5$ ), 1.39 (d,  $^3J_{\text{H-H}} = 6.9$  Hz, 6 H, *p*- $\text{CH}(\text{CH}_3)_2$ ), 1.30 (d,  $^3J_{\text{H-H}} = 6.9$  Hz, 6 H, *p*- $\text{CH}(\text{CH}_3)_2$ ), 1.23 (d,  $^3J_{\text{H-H}} = 6.8$  Hz, 6 H, *o*- $\text{CH}(\text{CH}_3)_2$ ), 1.18 (d,  $^3J_{\text{H-H}} = 6.8$  Hz, 6 H, *o*- $\text{CH}(\text{CH}_3)_2$ ), 0.45 (d,  $^3J_{\text{H-H}} = 6.7$  Hz, 6 H, *o*- $\text{CH}(\text{CH}_3)_2$ ). **<sup>13</sup>C{<sup>1</sup>H}-NMR** (100.62 MHz, 300.2 K,  $\text{C}_6\text{D}_6$ ):  $\delta$  (ppm) = 157.0 (d,  $^2J_{31\text{P}-13\text{C}} = 40.8$  Hz, C-1), 148.0 (s, *p*- $\text{C}_6\text{H}_2$ ), 147.8 (s, *o*- $\text{C}_6\text{H}_2$ ), 147.6 (d,  $^3J_{31\text{P}-13\text{C}} = 23.7$  Hz, *i*- $\text{C}_6\text{H}_3$ ), 147.0 (s, *o*- $\text{C}_6\text{H}_3$ ), 146.2 (s, *o*- $\text{C}_6\text{H}_2$ ), 138.7 (d,  $^1J_{31\text{P}-13\text{C}} = 73.6$  Hz, C-2), 138.7 (s, *i*- $\text{C}_6\text{H}_2$ ), 132.8 (d,  $^2J_{31\text{P}-13\text{C}} = 10.0$  Hz, *o*- $\text{C}_6\text{H}_5$ ), 131.5 (d,  $^1J_{31\text{P}-13\text{C}} = 64.8$  Hz, *i*- $\text{C}_6\text{H}_5$ ), 130.6 (d,  $^3J_{31\text{P}-13\text{C}} = 17.6$  Hz, C-6), 130.4 (d,  $^4J_{31\text{P}-13\text{C}} = 1.7$  Hz, *p*- $\text{C}_6\text{H}_5$ ), 130.1 (d,  $^4J_{31\text{P}-13\text{C}} = 1.0$  Hz, C-5), 129.9 (s, *m*- $\text{C}_6\text{H}_3$ ), 128.2 (d,  $^3J_{31\text{P}-13\text{C}} = 10.8$  Hz, *m*- $\text{C}_6\text{H}_5$ ), 127.1 (s, *p*- $\text{C}_6\text{H}_3$ ), 124.8 (d,  $^3J_{31\text{P}-13\text{C}} = 7.0$  Hz, C-4), 121.2 (s, *m*- $\text{C}_6\text{H}_2$ ), 115.3 (s,  $\text{C}_5(\text{CH}_3)_5$ ), 34.4 (s, *p*- $\text{CH}(\text{CH}_3)_2$ ), 31.1 (s, *o*- $\text{CH}(\text{CH}_3)_2$ ), 30.4 (s, *o*- $\text{CH}(\text{CH}_3)_2$ ), 26.1 (*o*- $\text{CH}(\text{CH}_3)_2$ ), 25.8 (s, *o*- $\text{CH}(\text{CH}_3)_2$ ), 24.6 (s, *p*- $\text{CH}(\text{CH}_3)_2$ ), 24.0 (s, *o*- $\text{CH}(\text{CH}_3)_2$ ), 23.5 (s, *p*- $\text{CH}(\text{CH}_3)_2$ ), 22.1 (s, *o*- $\text{CH}(\text{CH}_3)_2$ ), 11.0 (s,  $\text{C}_5(\text{CH}_3)_5$ ). **<sup>11</sup>B{<sup>1</sup>H}-NMR** (128.37 MHz, 299.2 K,  $\text{C}_6\text{D}_6$ ):  $\delta$  (ppm) = 0.1 (s). **<sup>31</sup>P{<sup>1</sup>H}-NMR** (161.97 MHz, 299.2 K,  $\text{C}_6\text{D}_6$ ) 36.6 (br). **Elemental analysis**: Calculated (%) for  $\text{C}_{64}\text{H}_{78}\text{AlBBrGeP}$ : 71.94 C, 7.36 H. Found: 72.07 C, 7.66 H.

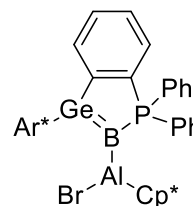

**14**: A solution of  $\text{Me}^e\text{NHC}$  (6.5 mg, 52.3  $\mu\text{mol}$ , 1 eq.) in toluene (2 mL) was added dropwise to a solution of **13** (55.7 mg, 52.1  $\mu\text{mol}$ , 1 eq.) in toluene (1 mL) and stirred for 80 minutes at room temperature. Removing the solvent under reduced pressure followed by co-evaporation of residual solvent with *n*-pentane (4 mL) afforded a red-orange powder. The product was extracted from the powder with toluene (7 mL) and filtered, followed by concentrating the filtrate to approx. 50 % of the initial volume under reduced pressure. Storage of the concentrated solution at –40 °C for four days afforded orange crystals. Washing the crystals with *n*-pentane (2 mL) and removing residual amounts of toluene by co-evaporation with *n*-pentane (2 mL) afforded **14** (40.5 mg, 34.0  $\mu\text{mol}$ , 65.1 %) in the form of an orange crystalline solid. Single crystals suitable for X-Ray diffraction were obtained from a concentrated solution of **14** in toluene at room temperature. **<sup>1</sup>H-NMR** (400.11 MHz, 299.2 K,  $\text{THF-d}_8$ ):  $\delta$  (ppm) = 7.66 – 7.52 (m, 4 H, *o*- $\text{C}_6\text{H}_5$ ), 7.49 – 7.42 (m, 1 H, *p*- $\text{C}_6\text{H}_3$ ), 7.36 – 7.28 (m, 3 H, *m*- $\text{C}_6\text{H}_3$ , *p*- $\text{C}_6\text{H}_5$ ), 7.19 – 7.17 (m, 1 H, *m*- $\text{C}_6\text{H}_2$ ), 7.17 – 7.09 (m, 5 H, H-3, *m*- $\text{C}_6\text{H}_2$ , *p*- $\text{C}_6\text{H}_5$ , 2  $\times$  *m*- $\text{C}_6\text{H}_5$ ), 7.08 – 7.02 (m, 1 H, H-5), 7.00 – 6.93 (m, 3 H, *m*- $\text{C}_6\text{H}_2$ , 2  $\times$  *m*- $\text{C}_6\text{H}_5$ ), 6.92 – 6.89 (m, 1 H, *m*- $\text{C}_6\text{H}_2$ ), 6.86 – 6.78 (m, 1 H, H-4), 6.54 – 6.47 (m, 1 H, H-6), 3.27 (sept,  $^3J_{\text{H-H}} = 6.7$  Hz, 1 H, *o*- $\text{CH}(\text{CH}_3)_2$ ), 3.23 – 3.11 (m, 7 H, N- $\text{CH}_3$ , *o*- $\text{CH}(\text{CH}_3)_2$ ), 3.07 (sept,  $^3J_{\text{H-H}} = 6.9$  Hz, 1 H, *p*- $\text{CH}(\text{CH}_3)_2$ ), 3.03 – 2.89 (m, 2 H, *o*- $\text{CH}(\text{CH}_3)_2$ , *p*- $\text{CH}(\text{CH}_3)_2$ ), 2.65 (sept,  $^3J_{\text{H-H}} = 6.8$  Hz, 1 H, *o*- $\text{CH}(\text{CH}_3)_2$ ), 1.84 (s, 6 H, C=C- $\text{CH}_3$ ), 1.50 (s, 15 H,  $\text{Cp}^*\text{-CH}_3$ ), 1.44 (d,  $^3J_{\text{H-H}} = 6.9$  Hz, 3 H, *p*- $\text{CH}(\text{CH}_3)_2$ ), 1.41 (d,  $^3J_{\text{H-H}} = 6.9$  Hz, 3 H, *p*- $\text{CH}(\text{CH}_3)_2$ ), 1.39 – 1.34 (m, 9 H, 3  $\times$  *o*- $\text{CH}(\text{CH}_3)_2$ , 6  $\times$  *p*- $\text{CH}(\text{CH}_3)_2$ ), 1.28 (d,  $^3J_{\text{H-H}} = 6.8$  Hz, 3 H, *o*- $\text{CH}(\text{CH}_3)_2$ ), 1.06 – 0.98 (m, 9 H, *o*- $\text{CH}(\text{CH}_3)_2$ ), 0.86 (d,  $^3J_{\text{H-H}} = 6.7$  Hz, 3 H, *o*- $\text{CH}(\text{CH}_3)_2$ ), 0.48 (d,  $^3J_{\text{H-H}} = 6.7$  Hz, 3 H, *o*- $\text{CH}(\text{CH}_3)_2$ ), –0.04 (d,  $^3J_{\text{H-H}} = 6.7$  Hz, 3 H, *o*- $\text{CH}(\text{CH}_3)_2$ ). **<sup>13</sup>C{<sup>1</sup>H}-NMR** (100.61 MHz, 299.2 K,  $\text{THF-d}_8$ ):  $\delta$  (ppm) = 162.8 (br, N $\underline{\text{C}}\text{N}$ ), 159.6 (d,  $^2J_{31\text{P}-13\text{C}} = 43.2$  Hz, C-1), 148.9 (d,

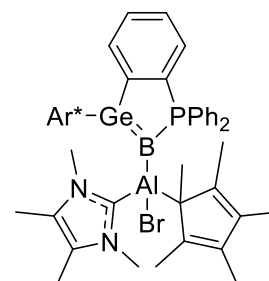

$^3J_{31P-13C} = 26.4$  Hz, *i*-C<sub>6</sub>H<sub>3</sub>), 147.7 (s, *o*-C<sub>6</sub>H<sub>2</sub>), 147.4 (s, *o*-C<sub>6</sub>H<sub>3</sub>), 147.3 (s, *p*-C<sub>6</sub>H<sub>2</sub>), 147.2 (s, *o*-C<sub>6</sub>H<sub>2</sub>), 147.0 (s, *o*-C<sub>6</sub>H<sub>3</sub>), 147.0 (s, *p*-C<sub>6</sub>H<sub>2</sub>), 146.8 (s, *o*-C<sub>6</sub>H<sub>2</sub>), 146.2 (s, *o*-C<sub>6</sub>H<sub>2</sub>), 140.2 (d,  $^1J_{31P-13C} = 68.9$  Hz, C-2), 139.3 (s, *i*-C<sub>6</sub>H<sub>2</sub>), 132.8 (d,  $^2J_{31P-13C} = 10.4$  Hz, *o*-C<sub>6</sub>H<sub>5</sub>), 132.7 (d,  $^2J_{31P-13C} = 9.9$  Hz, *o*-C<sub>6</sub>H<sub>5</sub>), 132.6 (d,  $^1J_{31P-13C} = 62.9$  Hz, *i*-C<sub>6</sub>H<sub>5</sub>), 130.9 (d,  $^1J_{31P-13C} = 61.9$  Hz, *i*-C<sub>6</sub>H<sub>5</sub>), 130.5 – 130.1 (m, C-6, 2 × *m*-C<sub>6</sub>H<sub>3</sub>), 129.7 (d,  $^4J_{31P-13C} = 2.0$  Hz, *p*-C<sub>6</sub>H<sub>5</sub>), 129.3 (br d, C-5), 129.2 (br d, *p*-C<sub>6</sub>H<sub>5</sub>), 127.5 (d,  $^2J_{31P-13C} = 6.7$  Hz, C-3), 127.1 (d,  $^3J_{31P-13C} = 11.0$  Hz, *m*-C<sub>6</sub>H<sub>5</sub>), 126.5 (d,  $^3J_{31P-13C} = 10.3$  Hz, *m*-C<sub>6</sub>H<sub>5</sub>), 125.8 (s, *p*-C<sub>6</sub>H<sub>3</sub>), 124.2 (s, C=C-CH<sub>3</sub>), 123.9 (d,  $^3J_{31P-13C} = 6.4$  Hz, C-4), 121.1 (s, *m*-C<sub>6</sub>H<sub>2</sub>), 120.6 (s, *m*-C<sub>6</sub>H<sub>2</sub>), 120.3 (s, *m*-C<sub>6</sub>H<sub>2</sub>), 119.8 (s, *m*-C<sub>6</sub>H<sub>2</sub>), 116.7 (s, Cp\*-C<sub>q</sub>), 34.4 (s, *p*-CH(CH<sub>3</sub>)<sub>2</sub>), 34.3 (s, *p*-CH(CH<sub>3</sub>)<sub>2</sub>), 34.2 (s, N-CH<sub>3</sub>), 31.0 (s, *o*-CH(CH<sub>3</sub>)<sub>2</sub>), 30.7 (s, *o*-CH(CH<sub>3</sub>)<sub>2</sub>), 30.2 (s, *o*-CH(CH<sub>3</sub>)<sub>2</sub>), 30.1 (s, *o*-CH(CH<sub>3</sub>)<sub>2</sub>), 25.8 (s, 2 × *o*-CH(CH(CH<sub>3</sub>)<sub>2</sub>)), 25.0 (s, *o*-CH(CH<sub>3</sub>)<sub>2</sub>), 24.8 (s, *o*-CH(CH<sub>3</sub>)<sub>2</sub>), 23.9 (s, *p*-CH(CH<sub>3</sub>)<sub>2</sub>), 23.7 (s, *p*-CH(CH<sub>3</sub>)<sub>2</sub>), 23.7 (s, *p*-CH(CH<sub>3</sub>)<sub>2</sub>), 23.6 (s, *p*-CH(CH<sub>3</sub>)<sub>2</sub>), 23.1 (s, *o*-CH(CH<sub>3</sub>)<sub>2</sub>), 22.6 (s, *o*-CH(CH<sub>3</sub>)<sub>2</sub>), 21.5 (s, *o*-CH(CH<sub>3</sub>)<sub>2</sub>), 21.5 (s, *o*-CH(CH<sub>3</sub>)<sub>2</sub>), 12.4 (s, Cp\*-CH<sub>3</sub>), 7.3 (s, C=C-CH<sub>3</sub>).  **$^{11}B\{^1H\}$ -NMR** (128.37 MHz, 299.2 K, THF-d<sub>8</sub>):  $\delta$  (ppm) = 3.6 (br).  **$^{31}P\{^1H\}$ -NMR** (161.97 MHz, 299.2 K, THF-d<sub>8</sub>):  $\delta$  (ppm) = 35.2 (br). **Elemental analysis:** Calculated (%) for C<sub>71</sub>H<sub>90</sub>AlBBrGeN<sub>2</sub>P·C<sub>7</sub>H<sub>8</sub>: 72.91 C, 7.61 H, found: 73.35 C, 7.826 H.

## Data of crystal structure analyses

Table S11. Data of compounds 2-7.

|                                              | (2)                                                      | (3)                                          | (4)                                                                                     | (5)                                          | (6)                                                                   | (7)                                          |
|----------------------------------------------|----------------------------------------------------------|----------------------------------------------|-----------------------------------------------------------------------------------------|----------------------------------------------|-----------------------------------------------------------------------|----------------------------------------------|
| Empirical formula                            | C <sub>73</sub> H <sub>91.03</sub> BBrGeN <sub>2</sub> P | C <sub>70</sub> H <sub>90</sub> BClGeNP      | C <sub>65</sub> H <sub>78</sub> BGeNP, C <sub>32</sub> H <sub>12</sub> BF <sub>24</sub> | C <sub>55</sub> H <sub>63</sub> BBrGeOP      | C <sub>71</sub> H <sub>63</sub> AlBF <sub>36</sub> GeO <sub>5</sub> P | C <sub>60</sub> H <sub>68</sub> BGePSe       |
| M <sub>r</sub> / g mol <sup>-1</sup>         | 1190.78                                                  | 1095.24                                      | 1850.90                                                                                 | 934.33                                       | 1821.56                                                               | 982.47                                       |
| λ / Å                                        | 0.71073                                                  | 0.71073                                      | 0.71073                                                                                 | 0.71073                                      | 0.71073                                                               | 0.71073                                      |
| T / K                                        | 100(2)                                                   | 100(2)                                       | 100(2)                                                                                  | 100(2)                                       | 120(2)                                                                | 100(2)                                       |
| Crystal system                               | monoclinic                                               | monoclinic                                   | triclinic                                                                               | monoclinic                                   | monoclinic                                                            | triclinic                                    |
| Space group                                  | P2 <sub>1</sub> /c                                       | P 21/n                                       | P -1                                                                                    | P 21/c                                       | P 21/n                                                                | P -1                                         |
| Z                                            | 4                                                        | 4                                            | 2                                                                                       | 4                                            | 4                                                                     | 2                                            |
| a / Å                                        | 14.6697(2)                                               | 18.2700(6)                                   | 12.8385(5)                                                                              | 10.5731(4)                                   | 17.2296(5)                                                            | 11.7124(4)                                   |
| b / Å                                        | 25.6742(4)                                               | 17.3395(5)                                   | 16.5703(6)                                                                              | 28.1523(9)                                   | 13.1098(4)                                                            | 13.1092(4)                                   |
| c / Å                                        | 17.2849(2)                                               | 19.7561(6)                                   | 21.3396(8)                                                                              | 16.5798(6)                                   | 34.3624(11)                                                           | 18.2445(6)                                   |
| α / °                                        | 90                                                       | 90                                           | 91.049(2)                                                                               | 90                                           | 90                                                                    | 107.1810(10)                                 |
| β / °                                        | 92.4820(10)                                              | 100.445(2)                                   | 98.702(2)                                                                               | 90.754(2)                                    | 94.446(2)                                                             | 98.0640(10)                                  |
| γ / °                                        | 90                                                       | 90                                           | 93.377(2)                                                                               | 90                                           | 90                                                                    | 100.1540(10)                                 |
| V / Å <sup>3</sup>                           | 6503.95(15)                                              | 6154.9(3)                                    | 4478.0(3)                                                                               | 4934.7(3)                                    | 7738.3(4)                                                             | 2578.65(15)                                  |
| D <sub>c</sub> / g cm <sup>-3</sup>          | 1.216                                                    | 1.182                                        | 1.373                                                                                   | 1.258                                        | 1.564                                                                 | 1.265                                        |
| μ / mm <sup>-1</sup>                         | 1.152                                                    | 0.608                                        | 0.457                                                                                   | 1.500                                        | 0.563                                                                 | 1.368                                        |
| F(000)                                       | 2520                                                     | 2344                                         | 1904                                                                                    | 1952                                         | 3672                                                                  | 1028                                         |
| Crystal size / mm                            | 0.253 × 0.198 × 0.186                                    | 0.332 × 0.188 × 0.173                        | 0.366 × 0.281 × 0.198                                                                   | 0.348 × 0.316 × 0.296                        | 0.378 × 0.352 × 0.212                                                 | 0.32 × 0.28 × 0.24                           |
| θ range / °                                  | 2.109 - 27.900                                           | 3.556 - 30.556                               | 2.60 - 25.88                                                                            | 2.41 - 27.06                                 | 1.663 - 30.534                                                        | 2.55 - 31.58                                 |
| Limiting indices                             | -19 < h < 19<br>-32 < k < 33<br>-22 < l < 22             | -26 < h < 26<br>-24 < k < 24<br>-28 < l < 28 | -15 < h < 16<br>-21 < k < 21<br>-27 < l < 27                                            | -13 < h < 13<br>-36 < k < 36<br>-21 < l < 21 | -24 < h < 24<br>-18 < k < 18<br>-48 < l < 49                          | -17 < h < 17<br>-19 < k < 19<br>-26 < l < 26 |
| Reflects. collect.                           | 110665                                                   | 152898                                       | 84154                                                                                   | 108423                                       | 217520                                                                | 69710                                        |
| Indepdnt Reflects                            | 15484                                                    | 18782                                        | 19540                                                                                   | 11002                                        | 23614                                                                 | 16891                                        |
| R <sub>int</sub>                             | 0.0713                                                   | 0.0622                                       | 0.0652                                                                                  | 0.0667                                       | 0.0426                                                                | 0.0302                                       |
| Completeness                                 | 0.994                                                    | 0.995                                        | 0.982                                                                                   | 0.994                                        | 0.997                                                                 | 0.975                                        |
| Absorp. Corr.                                | numerical                                                | multi-scan                                   | multi-scan                                                                              | multi-scan                                   | multi-scan                                                            | multi-scan                                   |
| Trans.(max., min.)                           | 1.0000, 0.9257                                           | 0.7461, 0.7072                               | 0.7455, 0.6893                                                                          | 0.7455, 0.6739                               | 0.7461, 0.6883                                                        | 0.7463, 0.7095                               |
| Parameters/restraints                        | 793                                                      | 720                                          | 1163                                                                                    | 553                                          | 1436                                                                  | 589                                          |
| R <sub>1</sub> , ωR <sub>2</sub> [I > 2σ(I)] | 0.0406, 0.0879                                           | 0.0424, 0.1001                               | 0.0501, 0.1034                                                                          | 0.0328, 0.0671                               | 0.0535, 0.1336                                                        | 0.0350, 0.0902                               |
| R <sub>1</sub> , ωR <sub>2</sub> (all data)  | 0.0659, 0.0981                                           | 0.0658, 0.1110                               | 0.0839, 0.1163                                                                          | 0.0505, 0.0727                               | 0.0718, 0.1449                                                        | 0.0438, 0.0945                               |
| Goof on F <sup>2</sup>                       | 1.008                                                    | 1.026                                        | 1.015                                                                                   | 1.037                                        | 1.020                                                                 | 1.053                                        |
| Δρ <sub>max,min</sub> / e·Å <sup>-3</sup>    | 1.530, -0.669                                            | 0.951, -0.682                                | 1.547, -0.857                                                                           | 0.765, -0.327                                | 1.575, -0.931                                                         | 0.947, -1.348                                |
| CCDC                                         | 2350052                                                  | 2350060                                      | 2350062                                                                                 | 2350063                                      | 2350059                                                               | 2350055                                      |

Table S12. Data of compounds **8-14**.

|                                              | (8)                                                   | (9)                                          | (10)                                                     | (11)                                                                                      | (12)                                                     | (13)                                         | (14)                                                     |
|----------------------------------------------|-------------------------------------------------------|----------------------------------------------|----------------------------------------------------------|-------------------------------------------------------------------------------------------|----------------------------------------------------------|----------------------------------------------|----------------------------------------------------------|
| Empirical formula                            | C <sub>61</sub> H <sub>69</sub> BBrGeO <sub>2</sub> P | C <sub>60</sub> H <sub>74</sub> BBrGeP       | C <sub>58</sub> H <sub>63</sub> BBrFeGe O <sub>4</sub> P | 2(C <sub>54</sub> H <sub>63</sub> BBr <sub>2</sub> CuGeP), C <sub>5</sub> H <sub>12</sub> | C <sub>58</sub> H <sub>71</sub> AuBrCl <sub>2</sub> GeOP | C <sub>64</sub> H <sub>78</sub> AlBBrGeP     | C <sub>85</sub> H <sub>106</sub> AlBBrGeN <sub>2</sub> P |
| M <sub>r</sub> / g mol <sup>-1</sup>         | 1028.45                                               | 989.47                                       | 1074.23                                                  | 2171.72                                                                                   | 1166.38                                                  | 1068.52                                      | 1376.99                                                  |
| λ / Å                                        | 0.71073                                               | 0.71073                                      | 0.71073                                                  | 0.71073                                                                                   | 0.71073                                                  | 0.71073                                      | 0.71073                                                  |
| T / K                                        | 100(2)                                                | 100(2)                                       | 106(2)                                                   | 100(2)                                                                                    | 100(2)                                                   | 100(2)                                       | 100(2)                                                   |
| Crystal system                               | triclinic                                             | triclinic                                    | trigonal                                                 | monoclinic                                                                                | monoclinic                                               | monoclinic                                   | triclinic                                                |
| Space group                                  | P -1                                                  | P -1                                         | P 32 2 1                                                 | P 21/c                                                                                    | P 21/c                                                   | P 21/c                                       | P -1                                                     |
| Z                                            | 2                                                     | 2                                            | 6                                                        | 2                                                                                         | 4                                                        | 8                                            | 2                                                        |
| a / Å                                        | 9.6665(2)                                             | 10.8284(3)                                   | 20.0501(4)                                               | 19.4738(4)                                                                                | 19.4927(4)                                               | 23.3641(5)                                   | 13.5727(5)                                               |
| b / Å                                        | 16.5723(4)                                            | 11.5846(3)                                   | 20.0501(4)                                               | 15.6084(4)                                                                                | 15.5941(3)                                               | 17.9056(4)                                   | 14.9983(6)                                               |
| c / Å                                        | 16.9238(4)                                            | 22.5224(6)                                   | 27.7768(6)                                               | 18.1663(4)                                                                                | 18.0318(3)                                               | 28.2604(6)                                   | 19.1435(7)                                               |
| α / °                                        | 84.989(2)                                             | 88.3060(10)                                  | 90                                                       | 90                                                                                        | 90                                                       | 90                                           | 91.740(2)                                                |
| β / °                                        | 79.9240(10)                                           | 81.9350(10)                                  | 90                                                       | 104.3940(10)                                                                              | 104.0510(10)                                             | 107.7390(10)                                 | 103.407(2)                                               |
| γ / °                                        | 86.3450(10)                                           | 70.6680(10)                                  | 120                                                      | 90                                                                                        | 90                                                       | 90                                           | 93.221(2)                                                |
| V / Å <sup>3</sup>                           | 2655.86(11)                                           | 2639.17(12)                                  | 9670.4(4)                                                | 5348.4(2)                                                                                 | 5317.15(18)                                              | 11260.6(4)                                   | 3781.0(2)                                                |
| D <sub>c</sub> / g cm <sup>-3</sup>          | 1.286                                                 | 1.245                                        | 1.107                                                    | 1.349                                                                                     | 1.457                                                    | 1.261                                        | 1.209                                                    |
| μ / mm <sup>-1</sup>                         | 1.401                                                 | 1.404                                        | 1.373                                                    | 2.518                                                                                     | 3.490                                                    | 1.336                                        | 1.011                                                    |
| F(000)                                       | 1076                                                  | 1042                                         | 3336                                                     | 2236                                                                                      | 2368                                                     | 4496                                         | 1460                                                     |
| Crystal size / mm                            | 0.27 × 0.25 × 0.23                                    | 0.24 × 0.22 × 0.20                           | 0.214 × 0.189 × 0.127                                    | 0.283 × 0.192 × 0.147                                                                     | 0.22 × 0.17 × 0.15                                       | 0.221 × 0.216 × 0.188                        | 0.387 × 0.365 × 0.218                                    |
| θ range / °                                  | 2.914 - 29.171                                        | 3.163 - 27.946                               | 3.189 - 28.340                                           | 2.61 - 31.99                                                                              | 1.693 - 27.210                                           | 3.27 - 29.32                                 | 2.526 - 33.767                                           |
| Limiting indices                             | -12 < h < 13<br>-22 < k < 22<br>0 < l < 23            | -14 < h < 14<br>-15 < k < 15<br>-29 < l < 29 | -21 < h < 26<br>-26 < k < 26<br>-37 < l < 37             | -29 < h < 29<br>-23 < k < 23<br>-25 < l < 27                                              | -25 < h < 24<br>-20 < k < 20<br>-23 < l < 22             | -35 < h < 35<br>-26 < k < 24<br>-42 < l < 42 | -21 < h < 21<br>-23 < k < 23<br>-29 < l < 29             |
| Reflects. collect.                           | 32620                                                 | 113470                                       | 161290                                                   | 107763                                                                                    | 86214                                                    | 272027                                       | 165739                                                   |
| Indepdnt Reflects                            | 32620                                                 | 12591                                        | 16049                                                    | 18602                                                                                     | 11780                                                    | 40215                                        | 29908                                                    |
| R <sub>int</sub>                             |                                                       | 0.0421                                       | 0.0622                                                   | 0.0416                                                                                    | 0.0780                                                   | 0.0828                                       | 0.0404                                                   |
| Completeness                                 | 0.991                                                 | 0.993                                        | 0.995                                                    | 0.997                                                                                     | 0.995                                                    | 0.996                                        | 0.987                                                    |
| Absorp. Corr.                                | multi-scan                                            | multi-scan                                   | multi-scan                                               | multi-scan                                                                                | multi-scan                                               | multi-scan                                   | multi-scan                                               |
| Trans.(max., min.)                           | 0.745, 0.657                                          | 0.7456, 0.6990                               | 0.7457, 0.6808                                           | 0.7463, 0.6404                                                                            | 0.7455, 0.6805                                           | 0.7464, 0.6731                               | 0.810, 0.696                                             |
| Parameters/restraints                        | 616                                                   | 591                                          | 634                                                      | 606                                                                                       | 632                                                      | 1277                                         | 1052                                                     |
| R <sub>1</sub> , ωR <sub>2</sub> [I > 2σ(I)] | 0.0421, 0.0906                                        | 0.0280, 0.0707                               | 0.0321, 0.0836                                           | 0.0320, 0.0742                                                                            | 0.0368, 0.0732                                           | 0.0443, 0.0929                               | 0.0303, 0.0760                                           |
| R <sub>2</sub> , ωR <sub>2</sub> (all data)  | 0.0658, 0.0996                                        | 0.0328, 0.0729                               | 0.0400, 0.0866                                           | 0.0468, 0.0798                                                                            | 0.0601, 0.0804                                           | 0.0842, 0.1065                               | 0.0437, 0.0820                                           |
| Goof on F <sup>2</sup>                       | 1.007                                                 | 1.042                                        | 1.038                                                    | 1.018                                                                                     | 1.022                                                    | 1.007                                        | 1.017                                                    |
| Δρ <sub>max,min</sub> / e·Å <sup>-3</sup>    | 0.500, -0.411                                         | 0.864, -1.034                                | 0.367, -0.337                                            | 1.000, -1.005                                                                             | 1.223, -0.853                                            | 1.436, -1.255                                | 0.594, -0.518                                            |
| CCDC                                         | 2350051                                               | 2350056                                      | 2350058                                                  | 2350054                                                                                   | 2350053                                                  | 2350057                                      | 2350061                                                  |

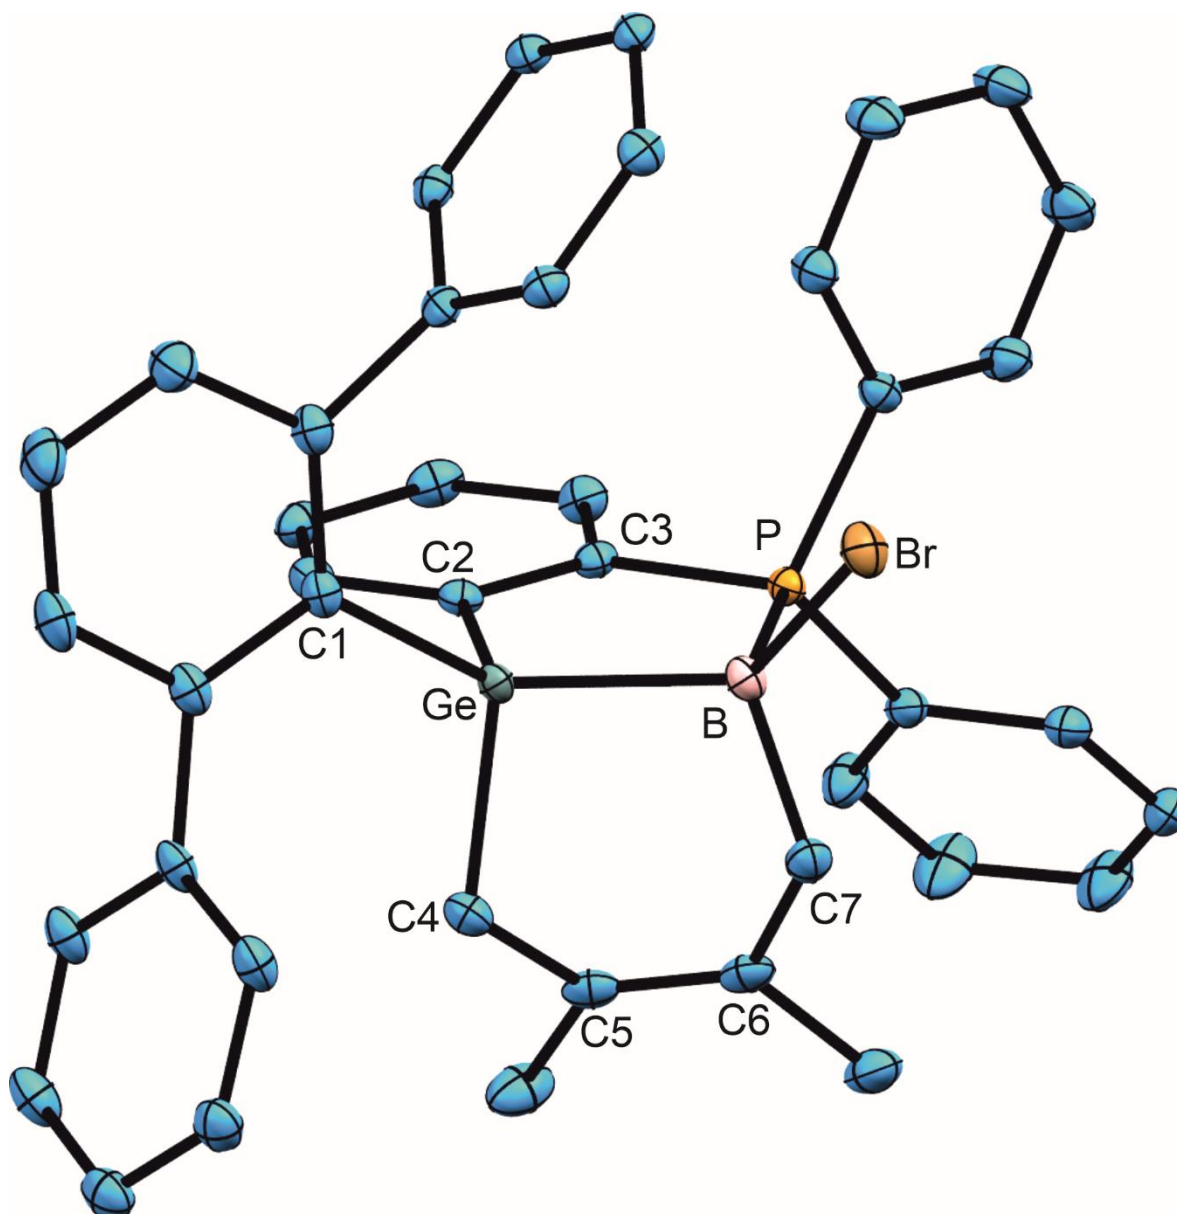

Figure S11. Ortep of the molecular structure of (9). Thermal ellipsoids are shown at 50 % probability level. Hydrogen atoms and *iPr* groups have been omitted. Interatomic distances in Å and angles in (°): Ge-B 2.1089(17), B-C7 1.626(2), C6-C7 1.521(2), C5-C6 1.342(2), C4-C5 1.507(2), Ge-C4 1.9842(15).

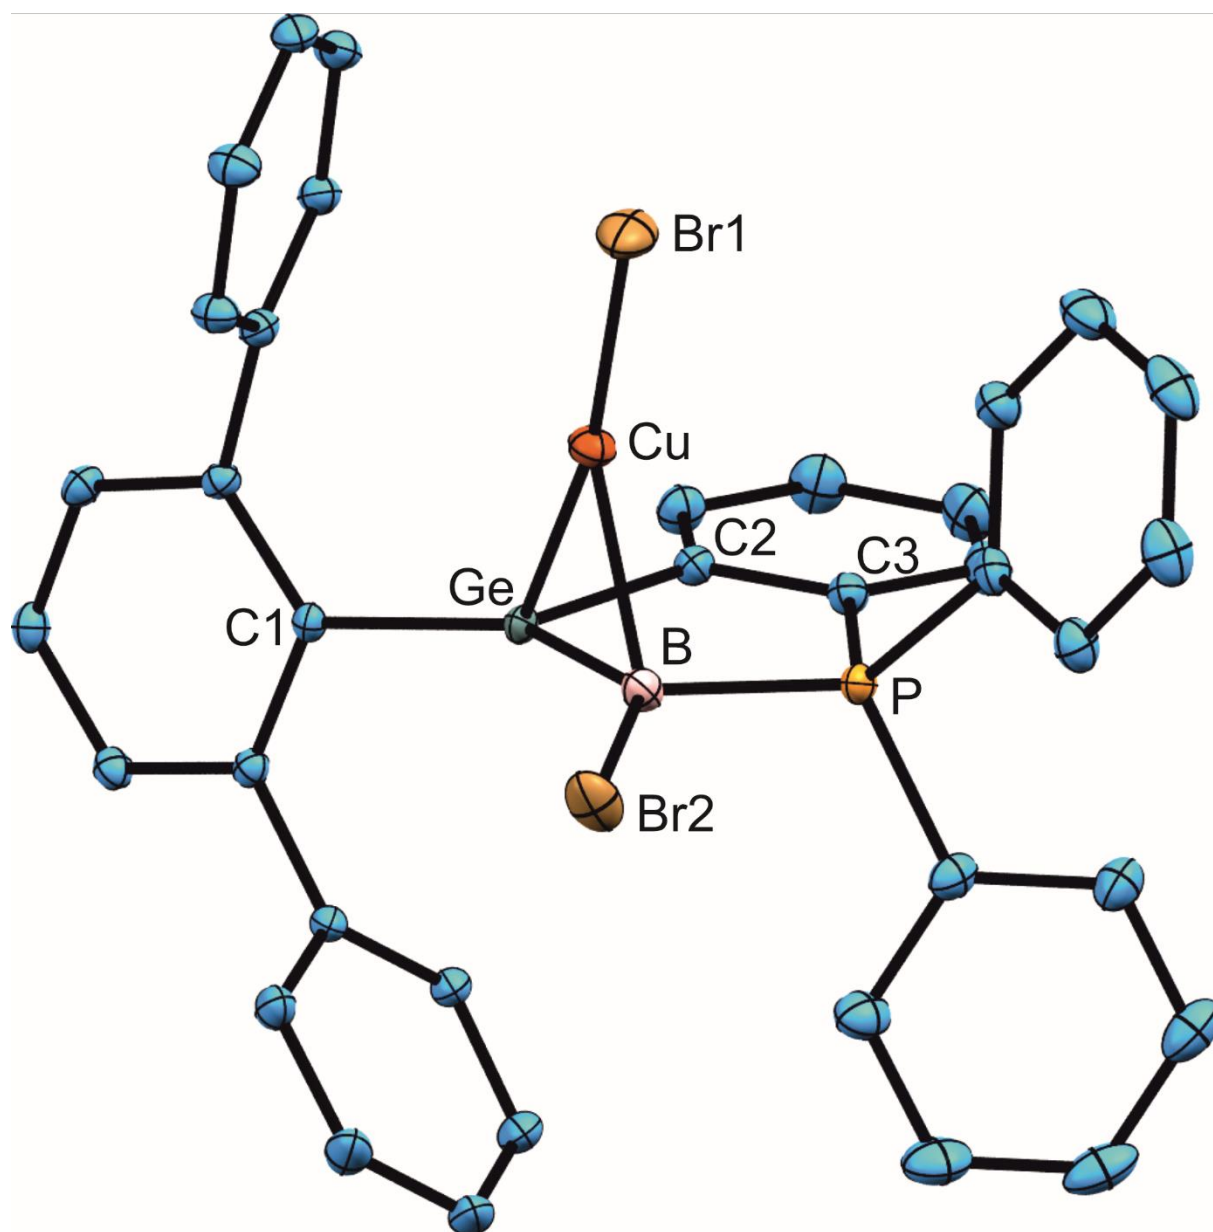

Figure S12. Ortep of the molecular structure of (**11**). Thermal ellipsoids are shown at 50 % probability level. Hydrogen atoms and *i*Pr groups have been omitted. Interatomic distances in Å and angles in (°): Ge-B 1.9266(18), Cu-B 2.1049(18), Ge-Cu 2.4627(3), B-P 1.9112(17), Cu-Br1 2.2632(3), B-Br2 1.9421(18), B-Ge-Cu 55.7(1), B-Cu-Ge 49.1(1), Cu-B-Ge 75.2(1), Br2-B-Cu 106.9(1), Br1-Cu-Ge 164.7(1).



## NMR spectroscopy

NMR spectra of compound **2**.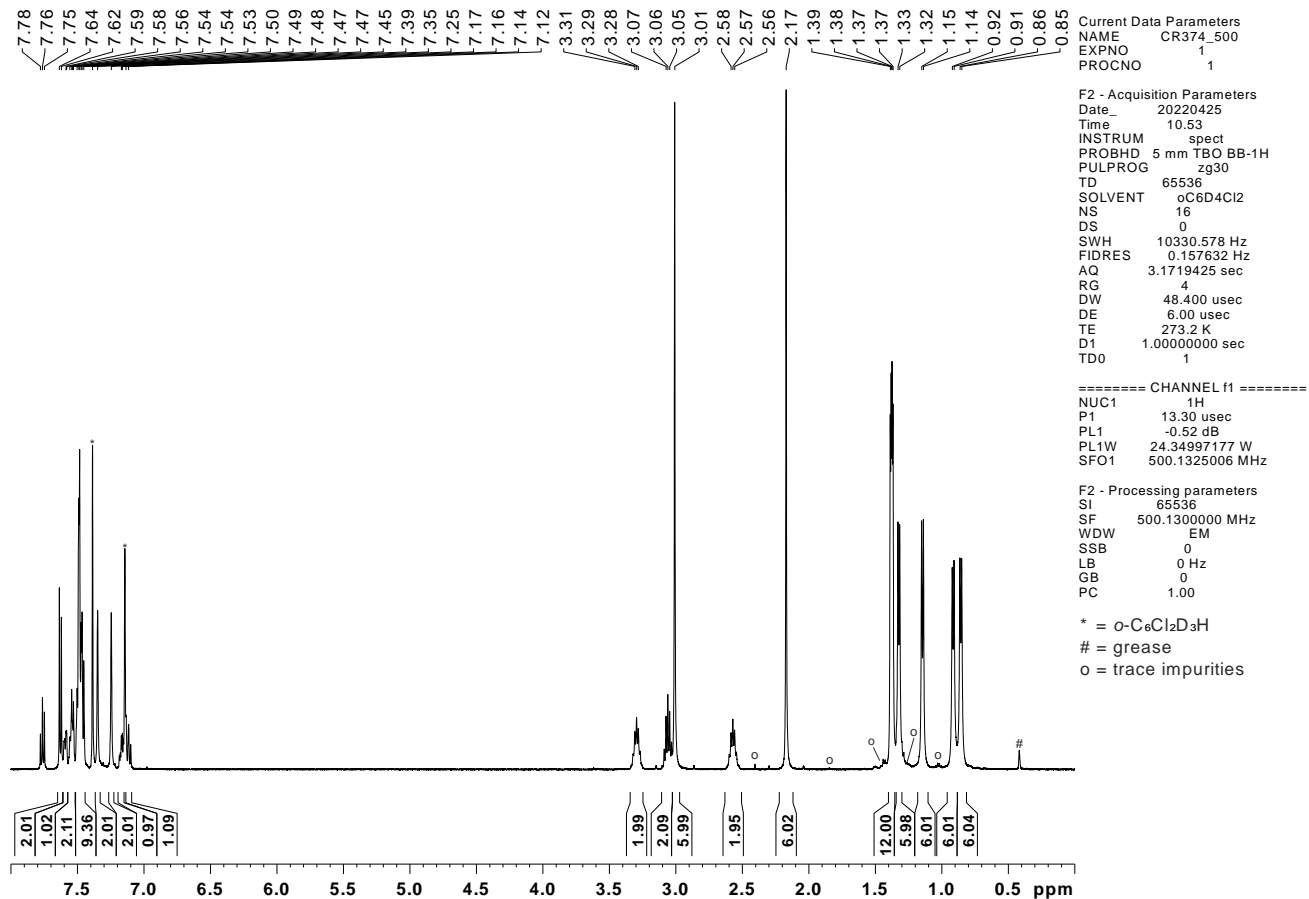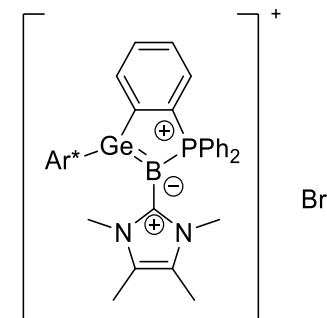Figure SI3. <sup>1</sup>H NMR spectrum of compound **2**.

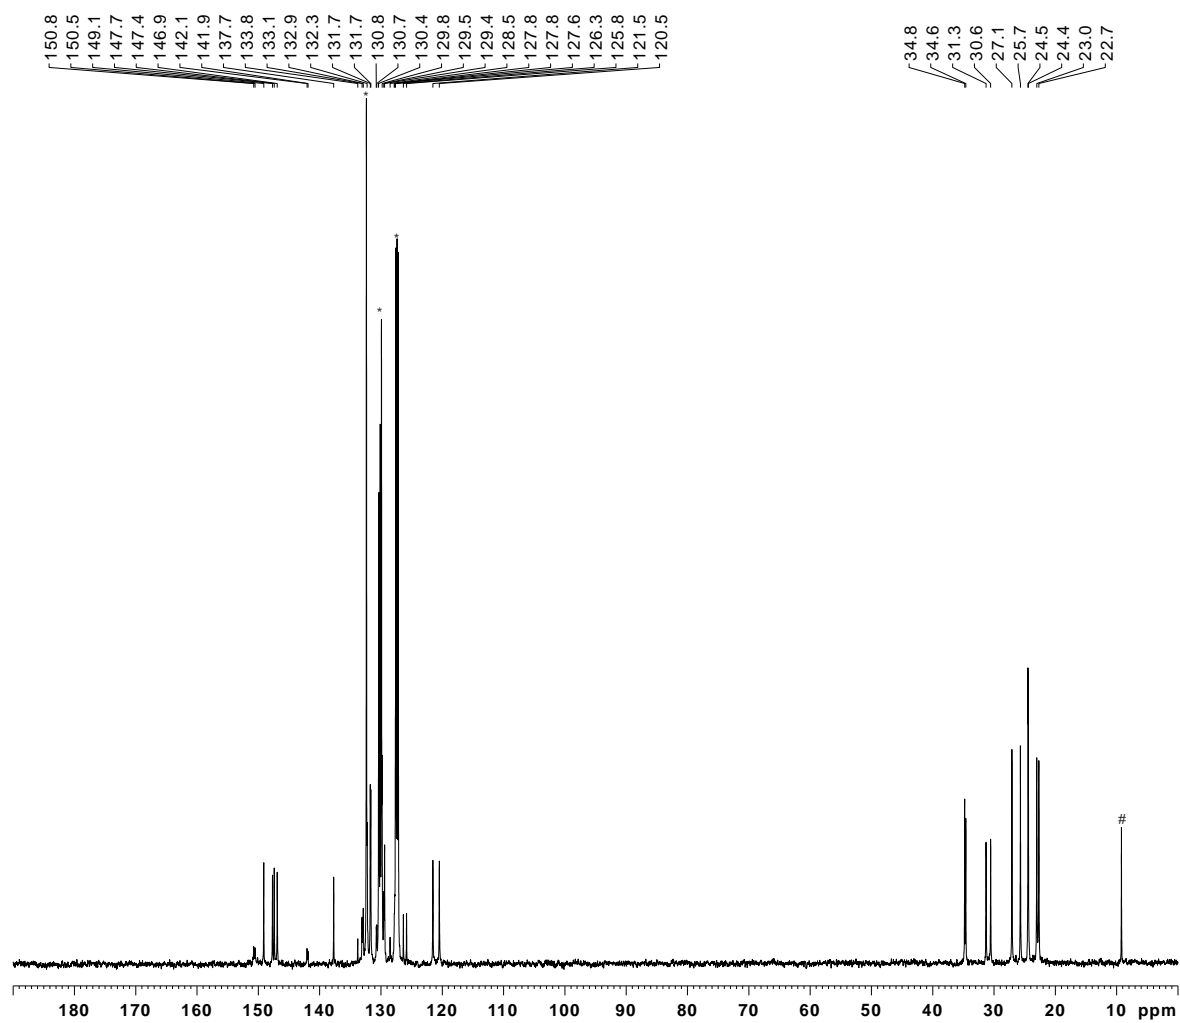

34.8  
34.6  
31.3  
30.6  
27.1  
25.7  
24.5  
24.4  
23.0  
22.7

Current Data Parameters  
NAME CR374\_500  
EXPNO 6  
PROCNO 1

F2 - Acquisition Parameters  
Date\_ 20220425  
Time 17.07  
INSTRUM spect  
PROBHD 5 mm TBO BB-1H  
PULPROG udef  
TD 27268  
SOLVENT oC6D4Cl2  
NS 1200  
DS 0  
SWH 37878.789 Hz  
FIDRES 1.389130 Hz  
AQ 0.3599376 sec  
RG 2050  
DW 13.200 usec  
DE 6.00 usec  
TE 273.2 K  
D1 1.00000000 sec  
D11 0.03000000 sec  
D12 0.00002000 sec  
D20 100.00000000 sec  
TD0 1

==== CHANNEL f1 =====  
NUC1 13C  
P1 8.32 usec  
P13 2000.00 usec  
P26 500.00 usec  
PL1 0.40 dB  
PL1W 76.51497650 W  
SFO1 125.7728799 MHz  
SP8 10.16 dB  
SP13 10.16 dB  
SPNAM[8] Crp60,0.5,20,1  
SPNAM[13] Crp60comp,4  
SPOAL8 0.500  
SPOAL13 0.500  
SPOFFS8 0 Hz  
SPOFFS13 0 Hz

==== CHANNEL f2 =====  
CPDPRG2 waltz16  
NUC2 1H  
PCPD2 80.00 usec  
PL2 -0.52 dB  
PL12 15.06 dB  
PL2W 24.34997177 W  
PL12W 0.67374945 W  
SFO2 500.1325006 MHz

F2 - Processing parameters  
SI 262144  
SF 125.7577890 MHz  
WDW EM  
SSB 0  
LB 5.00 Hz  
GB 0  
PC 1.40

\* = o-C6Cl2D4  
# = grease

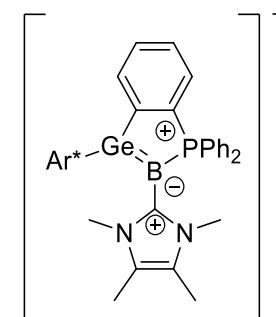

Br<sup>-</sup>

Figure SI4.  $^{13}\text{C}\{^1\text{H}\}$  NMR spectrum of compound 2.

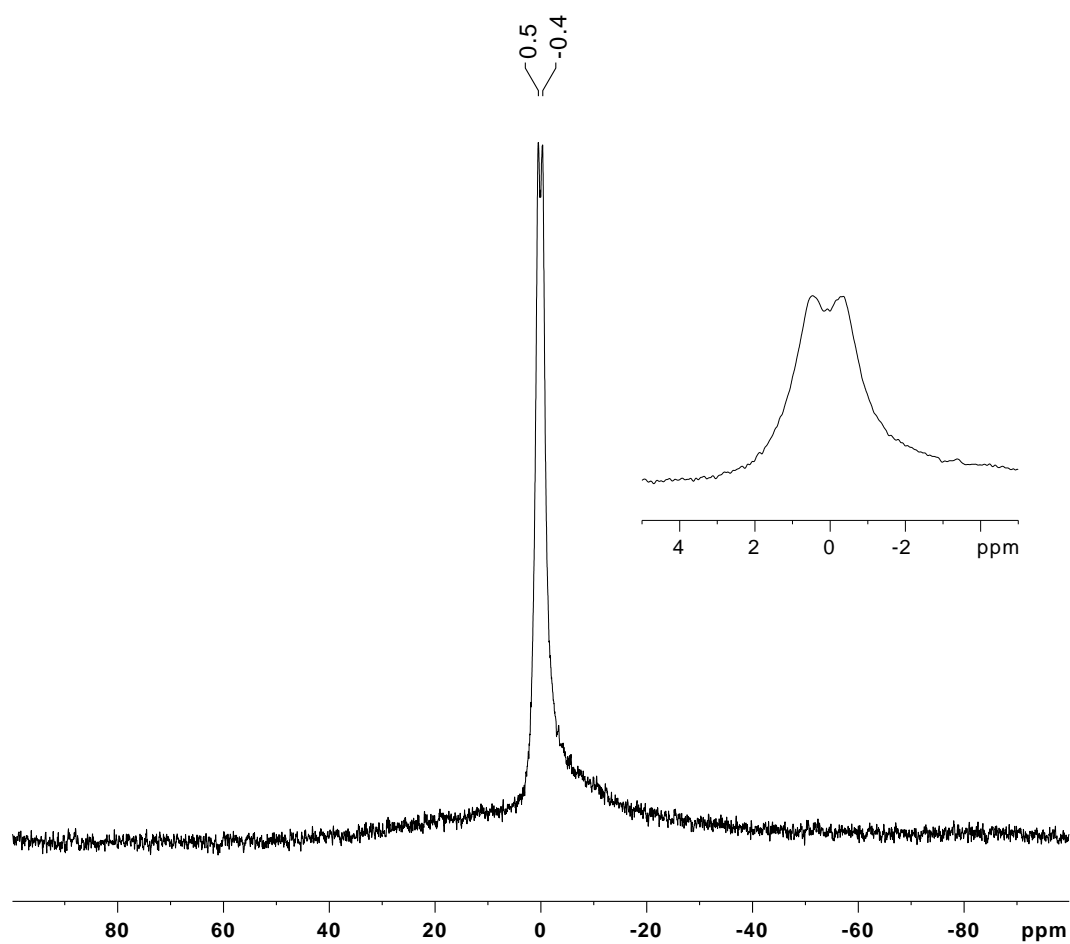

Current Data Parameters  
 NAME CR374\_500  
 EXPNO 8  
 PROCNO 1

F2 - Acquisition Parameters  
 Date\_ 20220426  
 Time 9.54  
 INSTRUM spect  
 PROBHD 5 mm TBO BB-1H  
 PULPROG zgigbs  
 TD 4096  
 SOLVENT oC6D4Cl2  
 NS 256  
 DS 0  
 SWH 32051.281 Hz  
 FIDRES 7.825020 Hz  
 AQ 0.0638976 sec  
 RG 1030  
 DW 15.600 usec  
 DE 6.00 usec  
 TE 273.2 K  
 D1 0.10000000 sec  
 D11 0.03000000 sec  
 TDO 1

==== CHANNEL f1 =====

NUC1 11B  
 P1 11.80 usec  
 P2 23.60 usec  
 PL1 0 dB  
 PL1W 88.92077637 W  
 SFO1 160.4615795 MHz

==== CHANNEL f2 =====

CPDPRG[2] waltz16  
 NUC2 1H  
 PCPD2 80.00 usec  
 PL2 -0.52 dB  
 PL12 15.06 dB  
 PL2W 24.34997177 W  
 PL12W 0.67374945 W  
 SFO2 500.1320005 MHz

F2 - Processing parameters

SI 32768  
 SF 160.4615790 MHz  
 WDW EM  
 SSB 0  
 LB 10.00 Hz  
 GB 0  
 PC 1.40

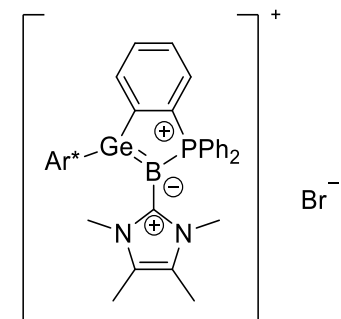

Figure S15.  $^{11}\text{B}\{^1\text{H}\}$  NMR spectrum of compound **2**.

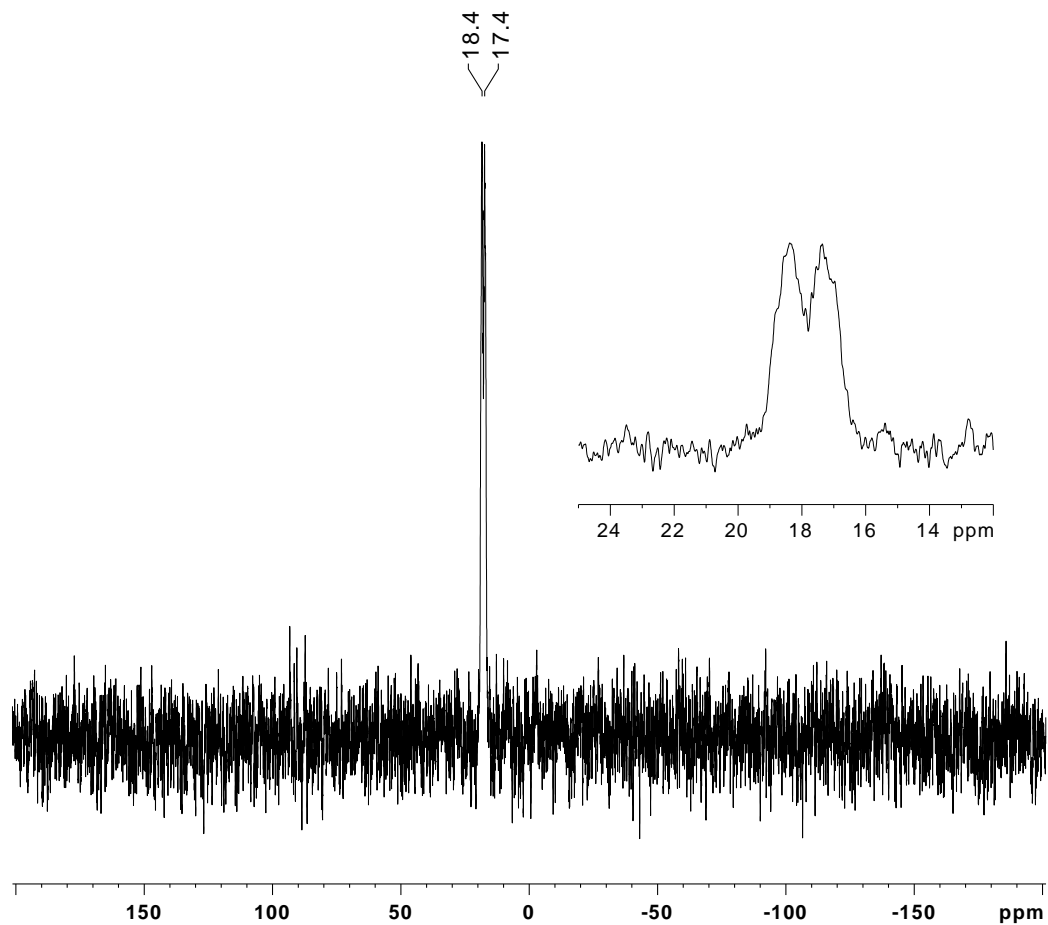

Current Data Parameters  
 NAME CR374\_500  
 EXPNO 11  
 PROCNO 1

F2 - Acquisition Parameters  
 Date\_ 20220426  
 Time 10.38  
 INSTRUM spect  
 PROBHD 5 mm TBO BB-1H  
 PULPROG zgig30  
 TD 109230  
 SOLVENT oC6D4Cl2  
 NS 32  
 DS 0  
 SWH 81521.742 Hz  
 FIDRES 0.746331 Hz  
 AQ 0.6699440 sec  
 RG 2050  
 DW 6.133 usec  
 DE 6.00 usec  
 TE 273.2 K  
 D1 1.0000000 sec  
 D11 0.0300000 sec  
 TD0 1

===== CHANNEL f1 =====  
 NUC1 31P  
 P1 13.50 usec  
 PL1 3.00 dB  
 PL1W 46.07667160 W  
 SFO1 202.4563352 MHz

===== CHANNEL f2 =====  
 CPDPRG2 waltz16  
 NUC2 1H  
 PCPD2 80.00 usec  
 PL2 -0.52 dB  
 PL12 15.06 dB  
 PL2W 24.34997177 W  
 PL12W 0.67374945 W  
 SFO2 500.1325007 MHz

F2 - Processing parameters  
 SI 131072  
 SF 202.4563350 MHz  
 WDW EM  
 SSB 0  
 LB 15.00 Hz  
 GB 0  
 PC 1.40

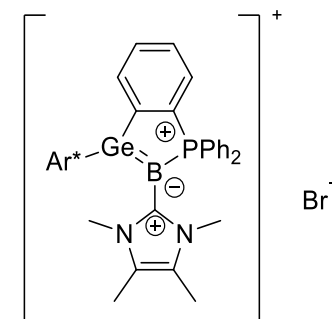

Figure SI6.  $^{31}\text{P}\{^1\text{H}\}$  NMR spectrum of compound **2**.

NMR spectra of compound **3**.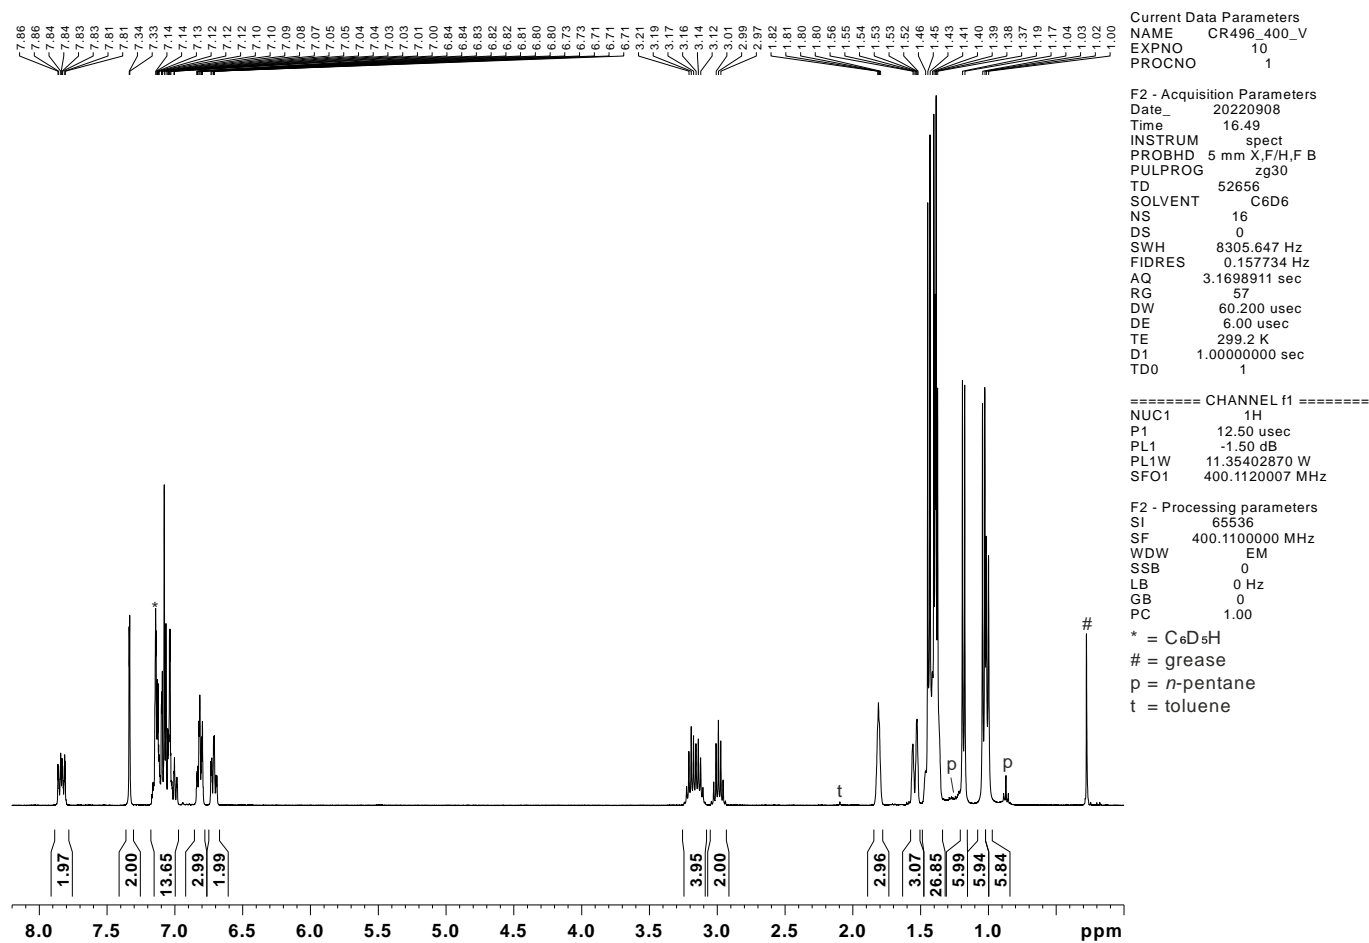Figure S17. <sup>1</sup>H NMR spectrum of compound **3**.

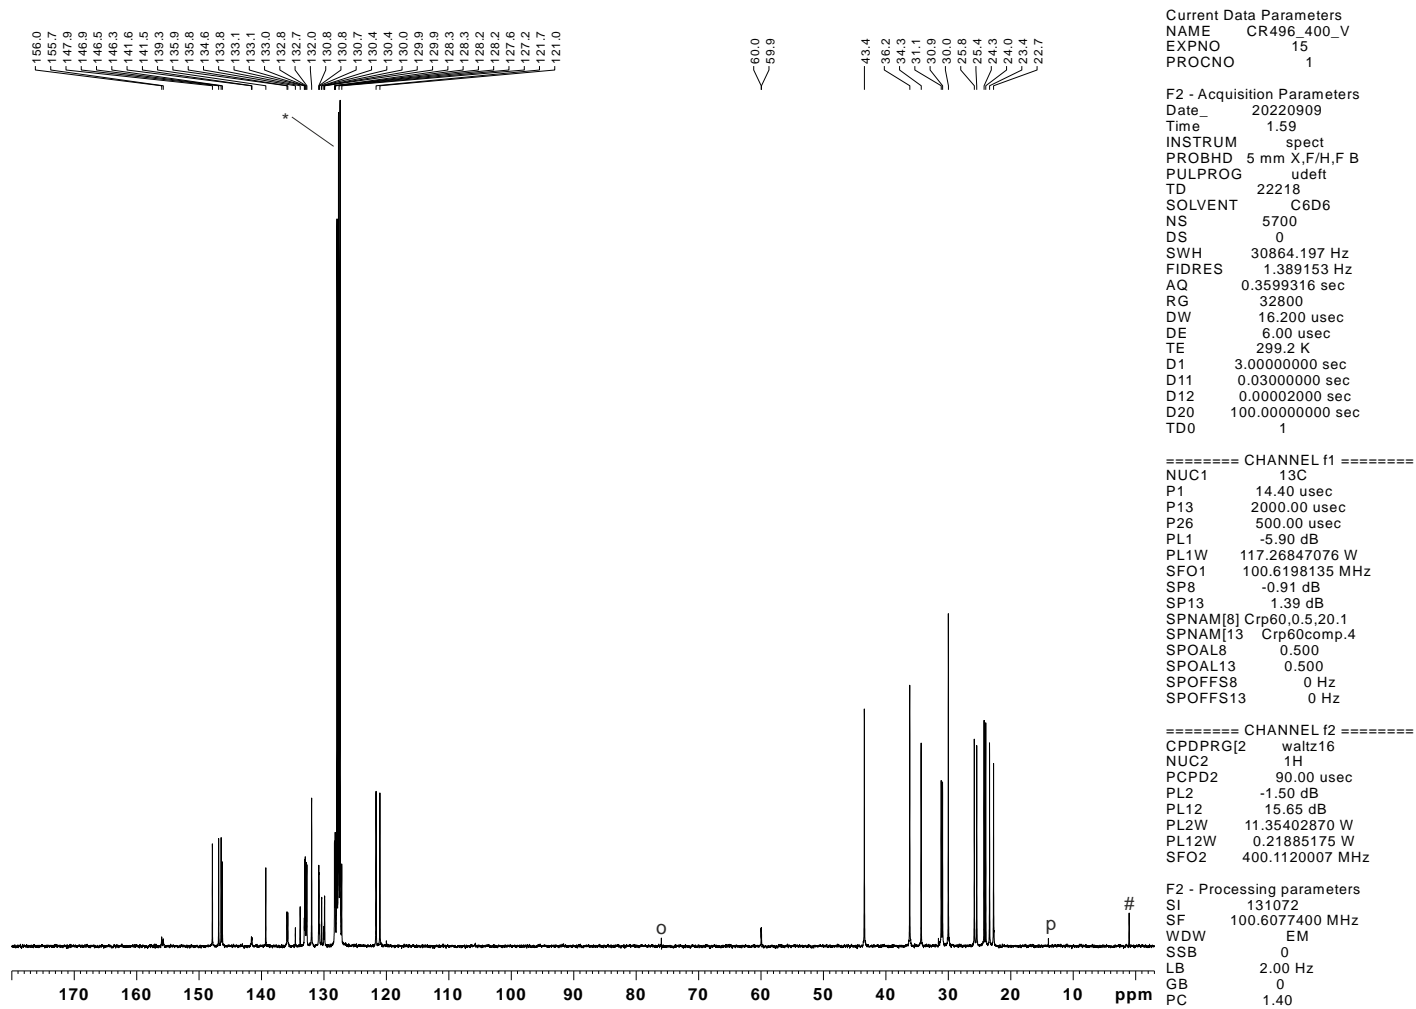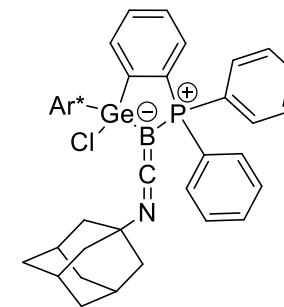Figure SI8.  $^{13}\text{C}\{^1\text{H}\}$  NMR spectrum of compound **3**.p = *n*-pentane

# = grease

o = trace impurity

\* =  $\text{C}_6\text{D}_6$

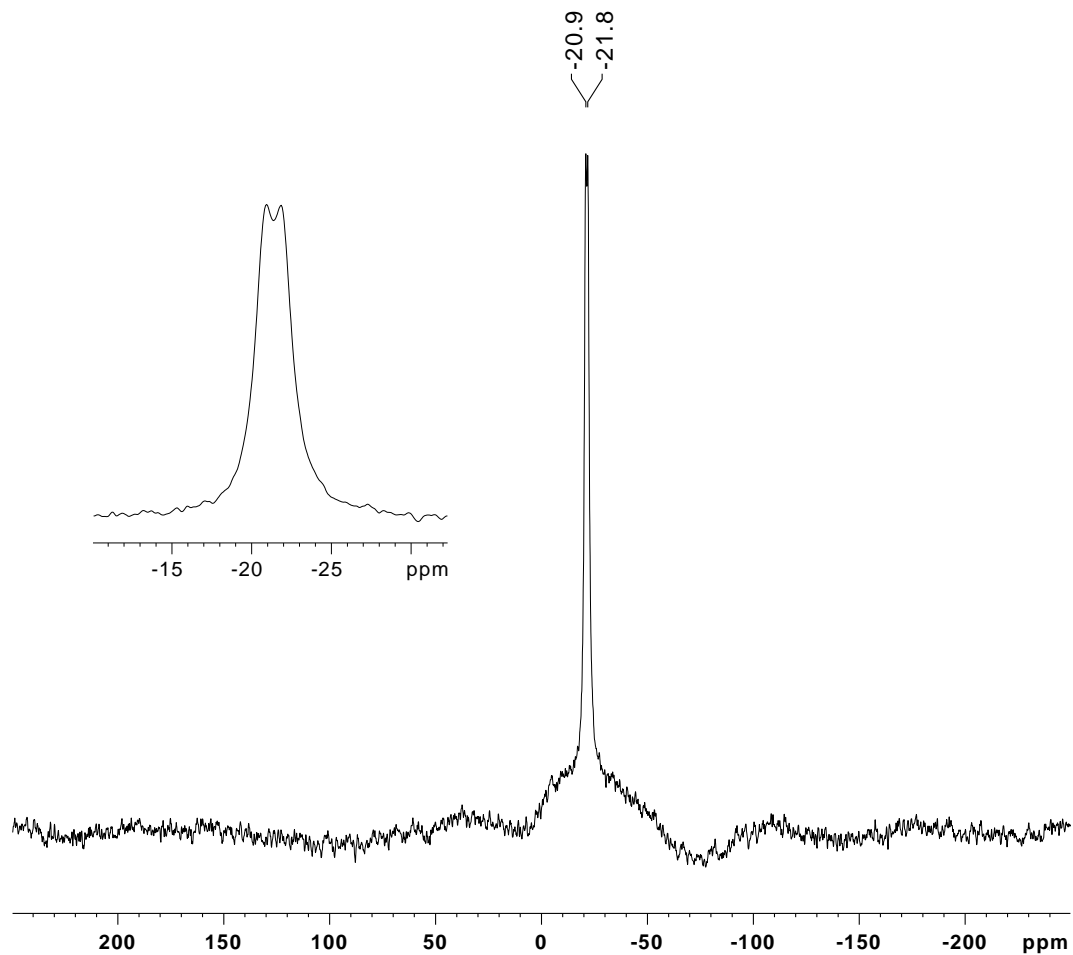

Current Data Parameters  
 NAME CR496\_400\_V  
 EXPNO 12  
 PROCNO 1

F2 - Acquisition Parameters  
 Date\_ 20220908  
 Time 16.54  
 INSTRUM spect  
 PROBHD 5 mm X,F/H,F B  
 PULPROG zgbsig  
 TD 8192  
 SOLVENT C6D6  
 NS 1024  
 DS 0  
 SWH 64102.562 Hz  
 FIDRES 7.825020 Hz  
 AQ 0.0638976 sec  
 RG 1820  
 DW 7.800 usec  
 DE 6.00 usec  
 TE 299.2 K  
 D1 0.10000000 sec  
 D11 0.03000000 sec  
 TD0 1

===== CHANNEL f1 =====  
 NUC1 11B  
 P1 15.00 usec  
 P2 30.00 usec  
 PL1 -3.00 dB  
 SFO1 128.3711884 MHz

===== CHANNEL f2 =====  
 CPDPRG2 garp  
 NUC2 1H  
 PCPD2 90.00 usec  
 PL2 -1.50 dB  
 PL12 15.65 dB  
 PL2W 11.35402870 W  
 PL12W 0.21885175 W  
 SFO2 400.1108002 MHz

F2 - Processing parameters  
 SI 8192  
 SF 128.3711880 MHz  
 WDW EM  
 SSB 0  
 LB 50.00 Hz  
 GB 0  
 PC 1.40

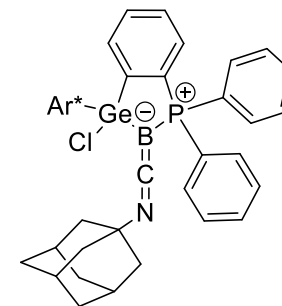

Figure S19.  $^{11}\text{B}\{^1\text{H}\}$  NMR spectrum of compound **3**.

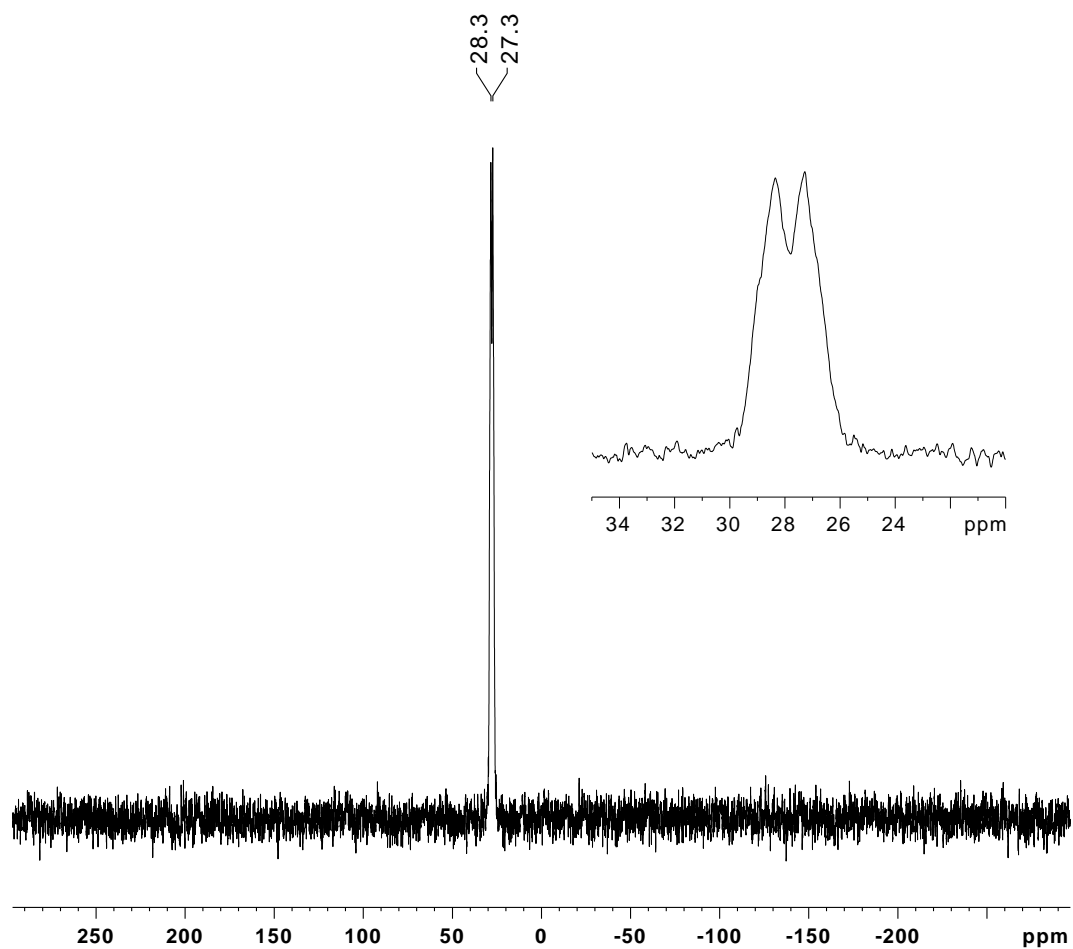

Current Data Parameters  
 NAME CR496\_400\_V  
 EXPNO 13  
 PROCNO 1

F2 - Acquisition Parameters  
 Date\_ 20220908  
 Time 17.01  
 INSTRUM spect  
 PROBHD 5 mm X,F/H,F B  
 PULPROG zgig30b  
 TD 88150  
 SOLVENT C6D6  
 NS 256  
 DS 0  
 SWH 96153.844 Hz  
 FIDRES 1.090798 Hz  
 AQ 0.4583800 sec  
 RG 23100  
 DW 5.200 usec  
 DE 6.00 usec  
 TE 299.2 K  
 D1 1.00000000 sec  
 D11 0.03000000 sec  
 TD0 1

===== CHANNEL f1 =====  
 NUC1 31P  
 P1 14.50 usec  
 PL1 -4.00 dB  
 PL1W 56.78615952 W  
 SFO1 161.9674970 MHz

===== CHANNEL f2 =====  
 CPDPRG2 waltz16  
 NUC2 1H  
 PCPD2 90.00 usec  
 PL2 -1.50 dB  
 PL12 15.65 dB  
 PL2W 11.35402870 W  
 PL12W 0.21885175 W  
 SFO2 400.1120007 MHz

F2 - Processing parameters  
 SI 131072  
 SF 161.9674970 MHz  
 WDW EM  
 SSB 0  
 LB 3.00 Hz  
 GB 0  
 PC 1.40

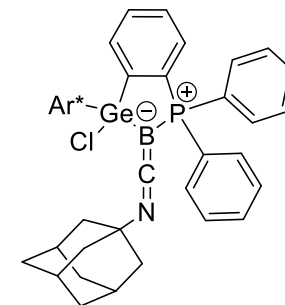

Figure SI10.  $^{31}\text{P}\{^1\text{H}\}$  NMR spectrum of compound **3**.



S25

NMR spectra of compound 4.

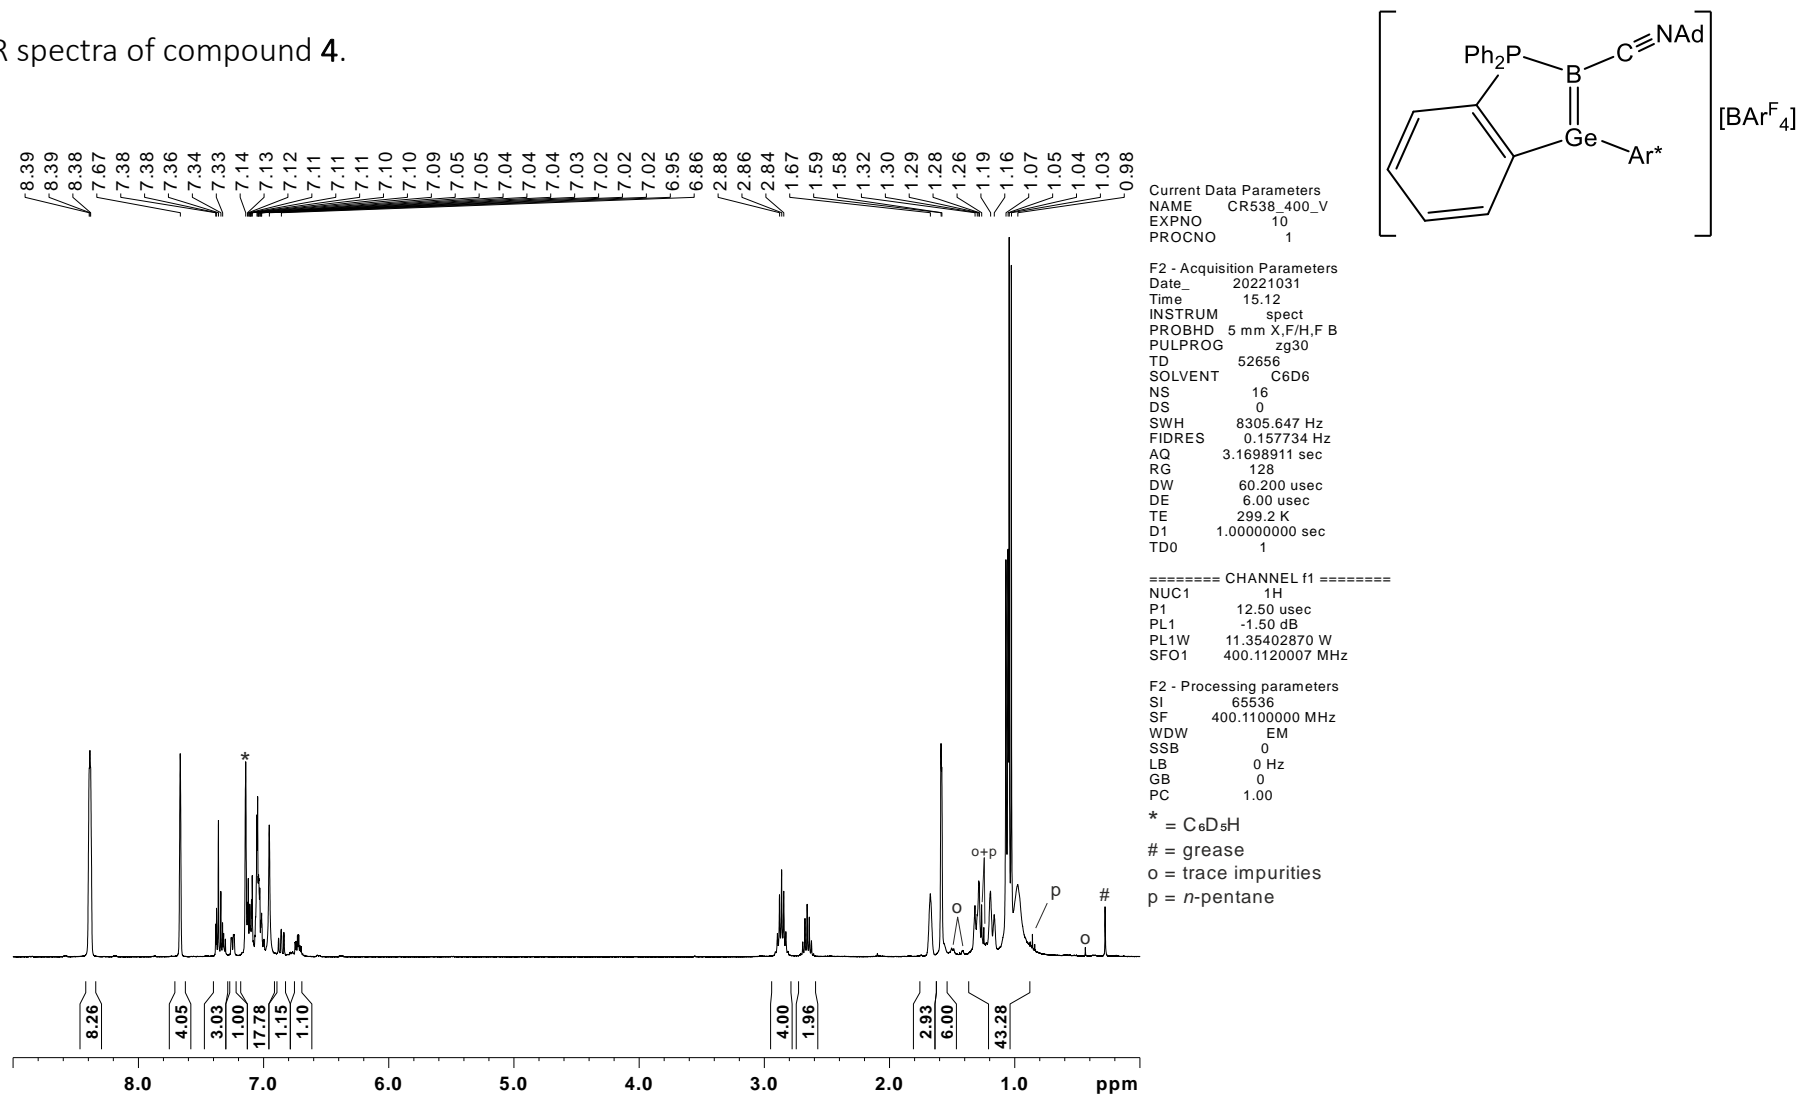Figure SI11. <sup>1</sup>H NMR spectrum of compound 4.

S26

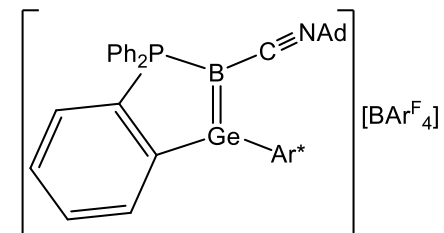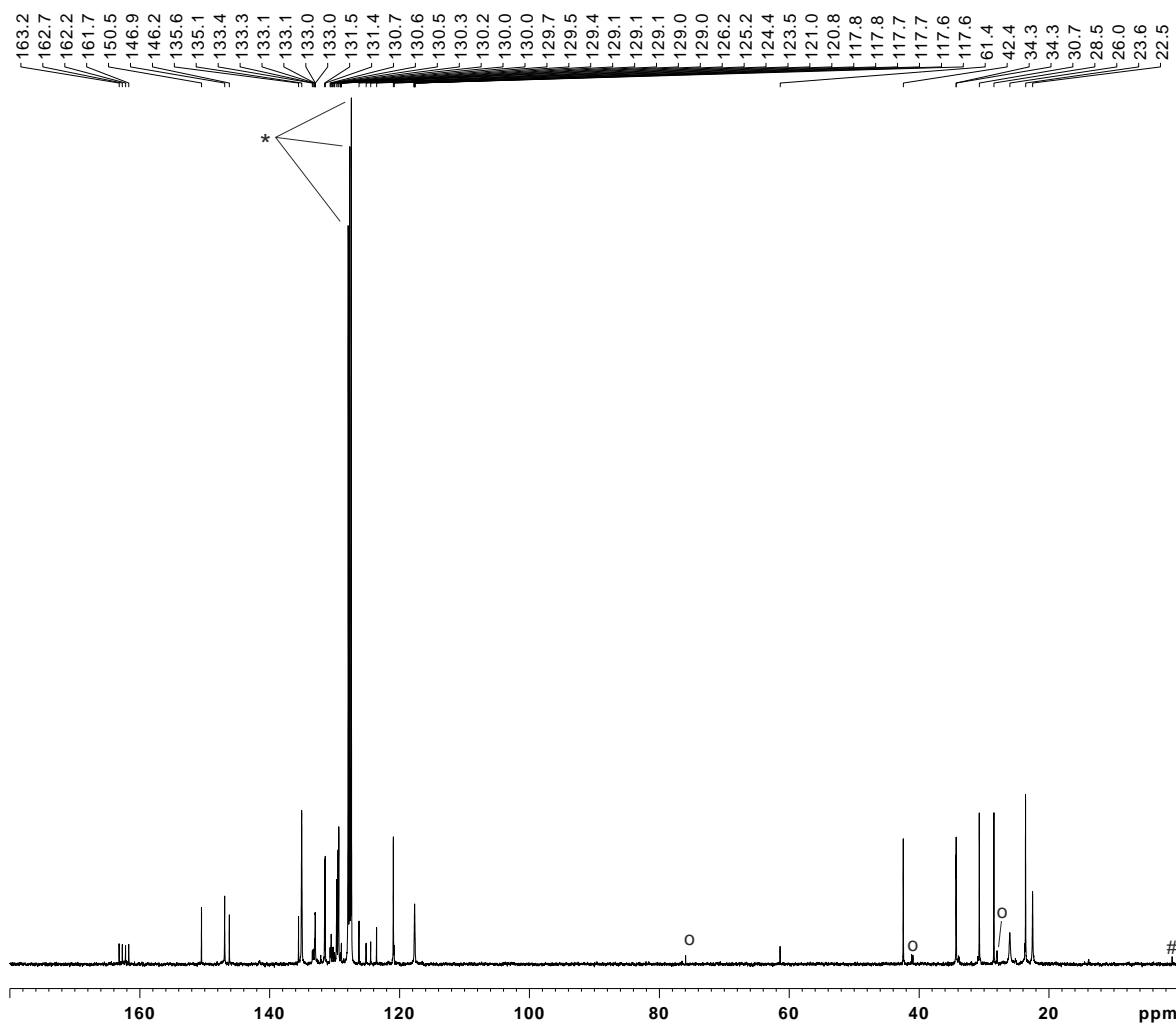

Current Data Parameters  
 NAME CR538\_400\_V  
 EXPNO 14  
 PROCNO 1

F2 - Acquisition Parameters  
 Date\_ 20221101  
 Time 1.59  
 INSTRUM spect  
 PROBHD 5 mm X.F/H,F B  
 PULPROG udeft  
 TD 22218  
 SOLVENT C6D6  
 NS 5700  
 DS 0  
 SWH 30864.197 Hz  
 FIDRES 1.389153 Hz  
 AQ 0.3599316 sec  
 RG 32800  
 DW 16.200 usec  
 DE 6.00 usec  
 TE 299.2 K  
 D1 3.00000000 sec  
 D11 0.03000000 sec  
 D12 0.00002000 sec  
 D20 100.00000000 sec  
 TD0 1

===== CHANNEL f1 =====  
 NUC1 13C  
 P1 14.40 usec  
 P13 2000.00 usec  
 P26 500.00 usec  
 PL1 -5.90 dB  
 PL1W 117.26847076 W  
 SFO1 100.6198135 MHz  
 SP8 -0.91 dB  
 SP13 1.39 dB  
 SPNAM[8] Crp60.0.5.20.1  
 SPNAM[13] Crp60comp.4  
 SPOAL8 0.500  
 SPOAL13 0.500  
 SPOFFS8 0 Hz  
 SPOFFS13 0 Hz

===== CHANNEL f2 =====  
 CPDPRG[2] waltz16  
 NUC2 1H  
 PCPD2 90.00 usec  
 PL2 -1.50 dB  
 PL12 15.65 dB  
 PL2W 11.35402870 W  
 PL12W 0.21885175 W  
 SFO2 400.1120007 MHz

F2 - Processing parameters  
 SI 131072  
 SF 100.6077400 MHz  
 WDW EM  
 SSB 0  
 LB 2.00 Hz  
 GB 0  
 PC 1.40

# = grease

o = trace impurity

\* =  $\text{C}_6\text{D}_6$ Figure SI12.  $^{13}\text{C}\{^1\text{H}\}$  NMR spectrum of compound 4.

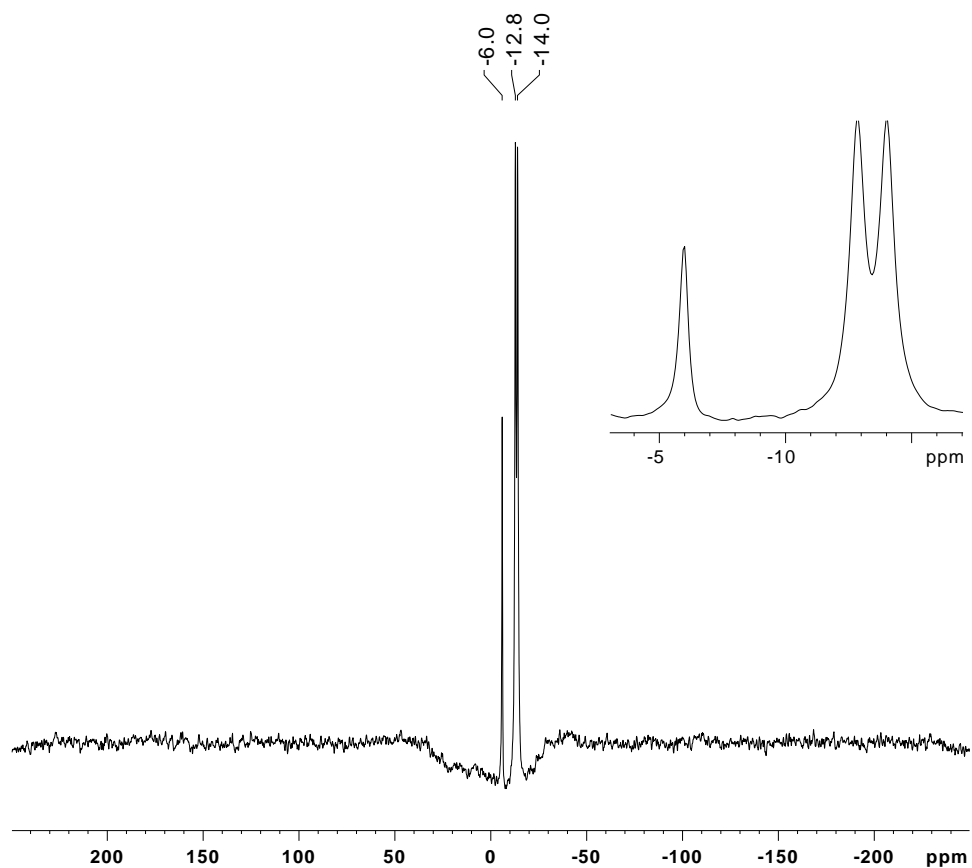

Current Data Parameters  
 NAME CR635\_400  
 EXPNO 21  
 PROCNO 1

F2 - Acquisition Parameters  
 Date\_ 20230811  
 Time 11.07  
 INSTRUM spect  
 PROBHD 5 mm X.F/H,F B  
 PULPROG zgbsig  
 TD 8192  
 SOLVENT Tol  
 NS 1024  
 DS 0  
 SWH 64102.562 Hz  
 FIDRES 7.825020 Hz  
 AQ 0.0638976 sec  
 RG 2050  
 DW 7.800 usec  
 DE 6.00 usec  
 TE 299.2 K  
 D1 0.10000000 sec  
 D11 0.03000000 sec  
 TD0 1

===== CHANNEL f1 =====  
 NUC1 11B  
 P1 15.00 usec  
 P2 30.00 usec  
 PL1 -3.00 dB  
 SFO1 128.3711884 MHz

===== CHANNEL f2 =====  
 CPDPRG[2] garp  
 NUC2 1H  
 PCPD2 90.00 usec  
 PL2 -1.50 dB  
 PL12 15.65 dB  
 PL2W 11.35402870 W  
 PL12W 0.21885175 W  
 SFO2 400.1108002 MHz

F2 - Processing parameters  
 SI 8192  
 SF 128.3711880 MHz  
 WDW EM  
 SSB 0  
 LB 50.00 Hz  
 GB 0  
 PC 1.40

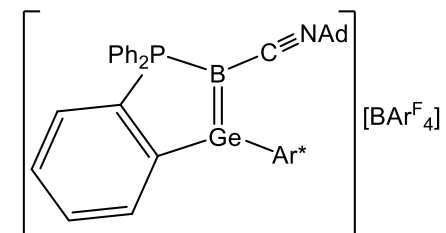

Figure SI13.  $^{11}\text{B}\{^1\text{H}\}$  NMR spectrum of compound 4.

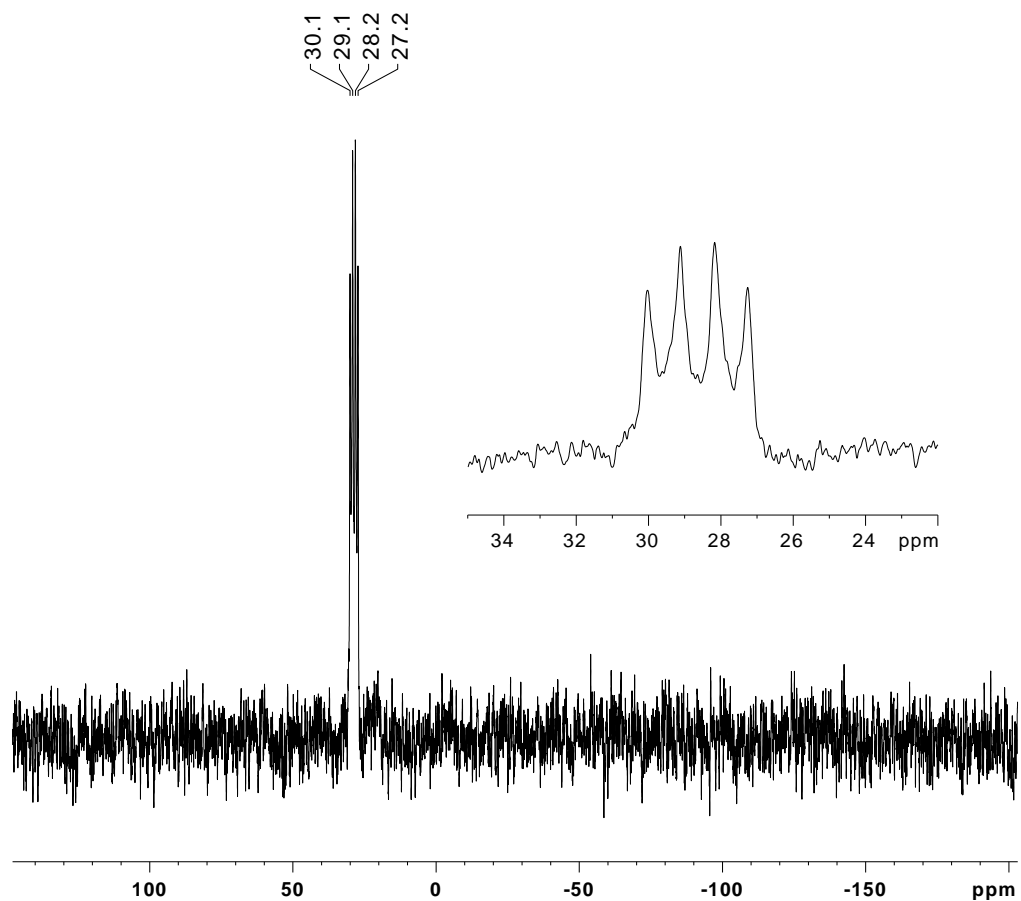

Current Data Parameters  
 NAME CR635\_400  
 EXPNO 22  
 PROCNO 1

F2 - Acquisition Parameters  
 Date\_ 20230811  
 Time 11.14  
 INSTRUM spect  
 PROBHD 5 mm X,F/H,F B  
 PULPROG zgig30b  
 TD 88150  
 SOLVENT Tol  
 NS 256  
 DS 0  
 SWH 96153.844 Hz  
 FIDRES 1.090798 Hz  
 AQ 0.4583800 sec  
 RG 23100  
 DW 5.200 usec  
 DE 6.00 usec  
 TE 299.2 K  
 D1 1.00000000 sec  
 D11 0.03000000 sec  
 TD0 1

===== CHANNEL f1 =====  
 NUC1 31P  
 P1 14.50 usec  
 PL1 -4.00 dB  
 PL1W 56.78615952 W  
 SFO1 161.9674970 MHz

===== CHANNEL f2 =====  
 CPDPRG2 waltz16  
 NUC2 1H  
 PCPD2 90.00 usec  
 PL2 -1.50 dB  
 PL12 15.65 dB  
 PL2W 11.35402870 W  
 PL12W 0.21885175 W  
 SFO2 400.1120007 MHz

F2 - Processing parameters  
 SI 131072  
 SF 161.9674970 MHz  
 WDW EM  
 SSB 0  
 LB 15.00 Hz  
 GB 0  
 PC 1.40

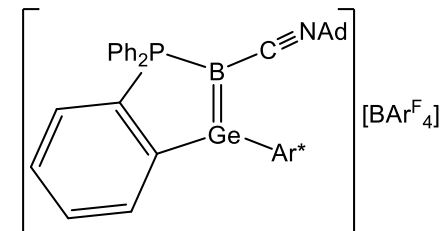

Figure SI14.  $^{31}\text{P}\{^1\text{H}\}$  NMR spectrum of compound **4**.

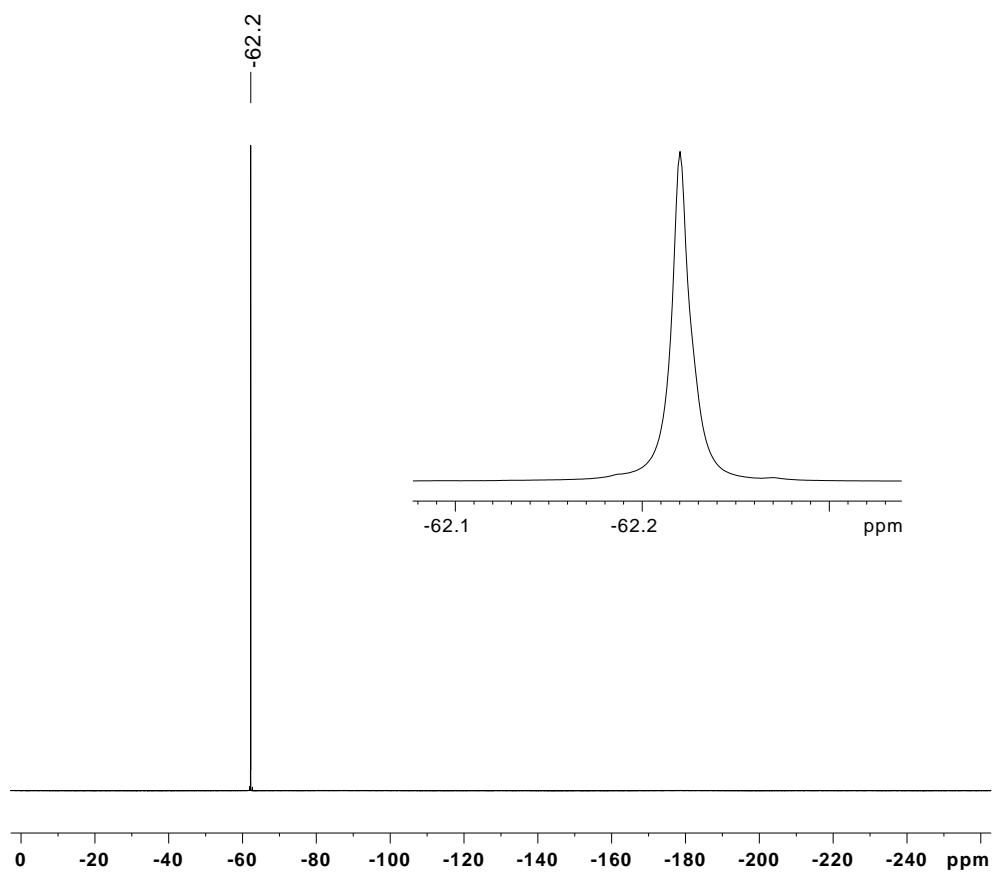

Current Data Parameters  
 NAME CR635\_400  
 EXPNO 23  
 PROCNO 1

F2 - Acquisition Parameters  
 Date\_ 20230811  
 Time 11.16  
 INSTRUM spect  
 PROBHD 5 mm X,F/H,F B  
 PULPROG zgfhigqn  
 TD 131072  
 SOLVENT Tol  
 NS 32  
 DS 0  
 SWH 100000.000 Hz  
 FIDRES 0.762939 Hz  
 AQ 0.6553600 sec  
 RG 4100  
 DW 5.000 usec  
 DE 6.00 usec  
 TE 299.2 K  
 D1 1.00000000 sec  
 D11 0.03000000 sec  
 D12 0.00002000 sec  
 TD0 1

===== CHANNEL f1 =====  
 NUC1 19F  
 P1 19.70 usec  
 PL1 -6.00 dB  
 PL1W 62.00000000 W  
 SFO1 376.4306030 MHz

===== CHANNEL f2 =====  
 CPDPRG[2] waltz16  
 NUC2 1H  
 PCPD2 90.00 usec  
 PL2 -1.50 dB  
 PL12 15.65 dB  
 PL2W 11.35402870 W  
 PL12W 0.21885175 W  
 SFO2 400.1120007 MHz

F2 - Processing parameters  
 SI 262144  
 SF 376.4795470 MHz  
 WDW EM  
 SSB 0  
 LB 2.00 Hz  
 GB 0  
 PC 1.00

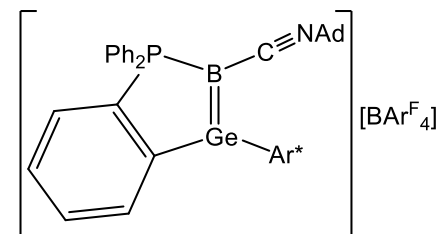

Figure SI15.  $^{19}\text{F}\{^1\text{H}\}$  NMR spectrum of compound 4.

NMR spectra of compound 5.

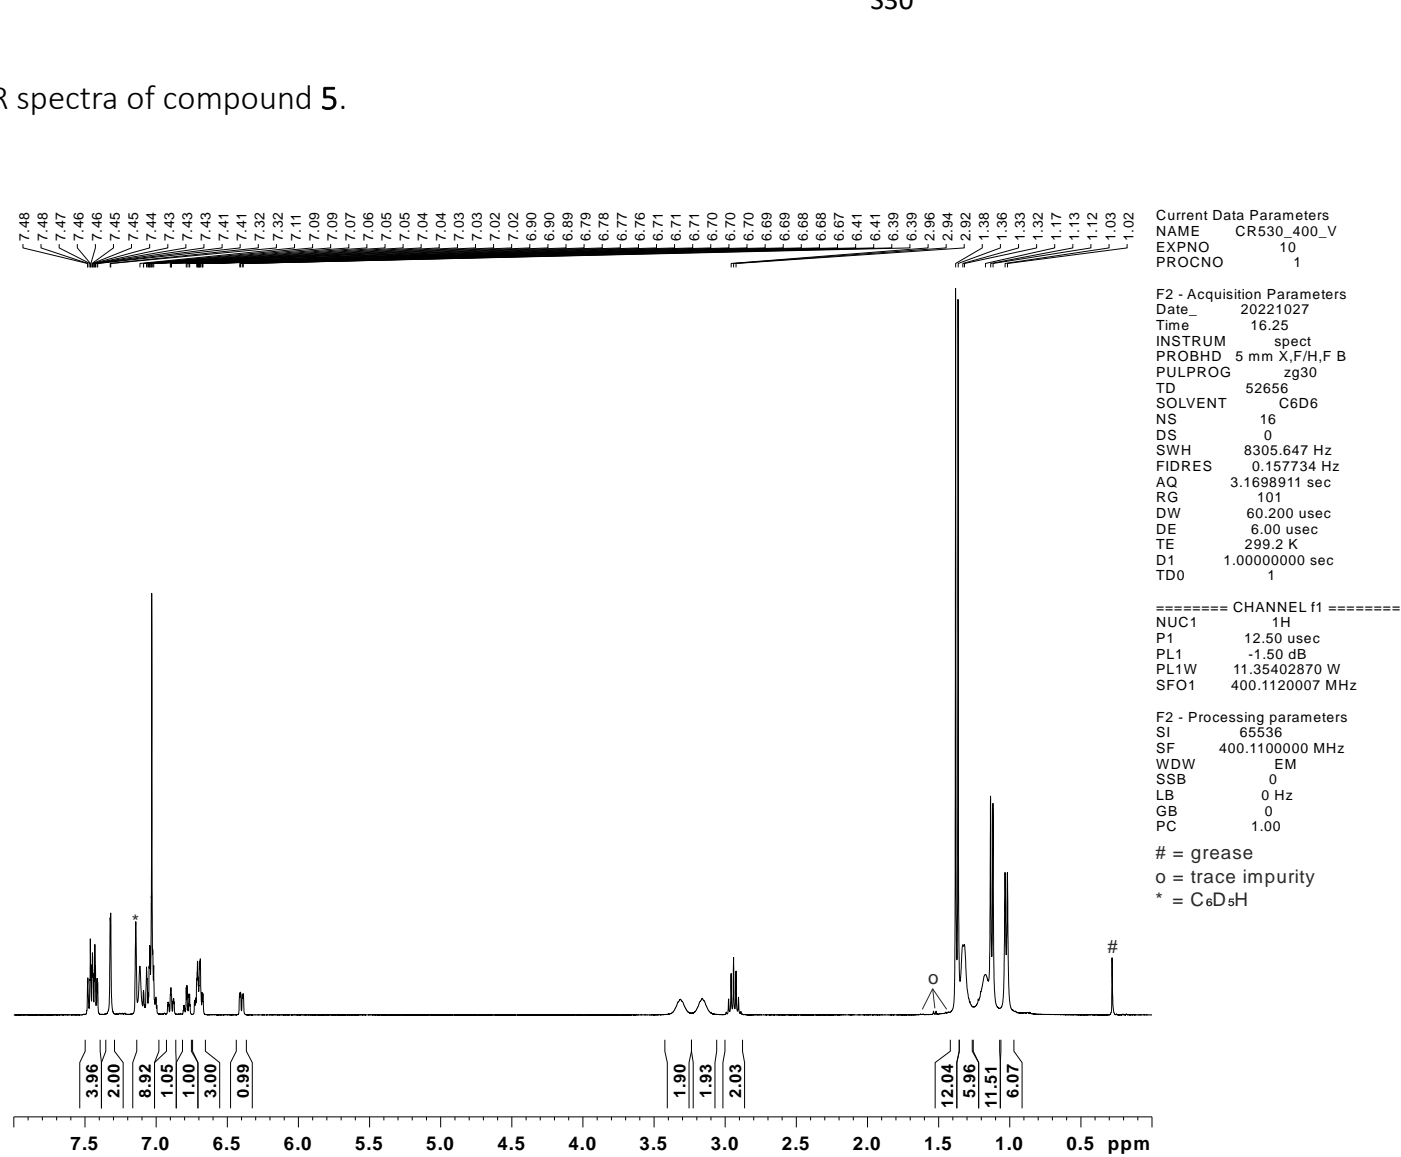Figure SI16. <sup>1</sup>H NMR spectrum of compound 5.

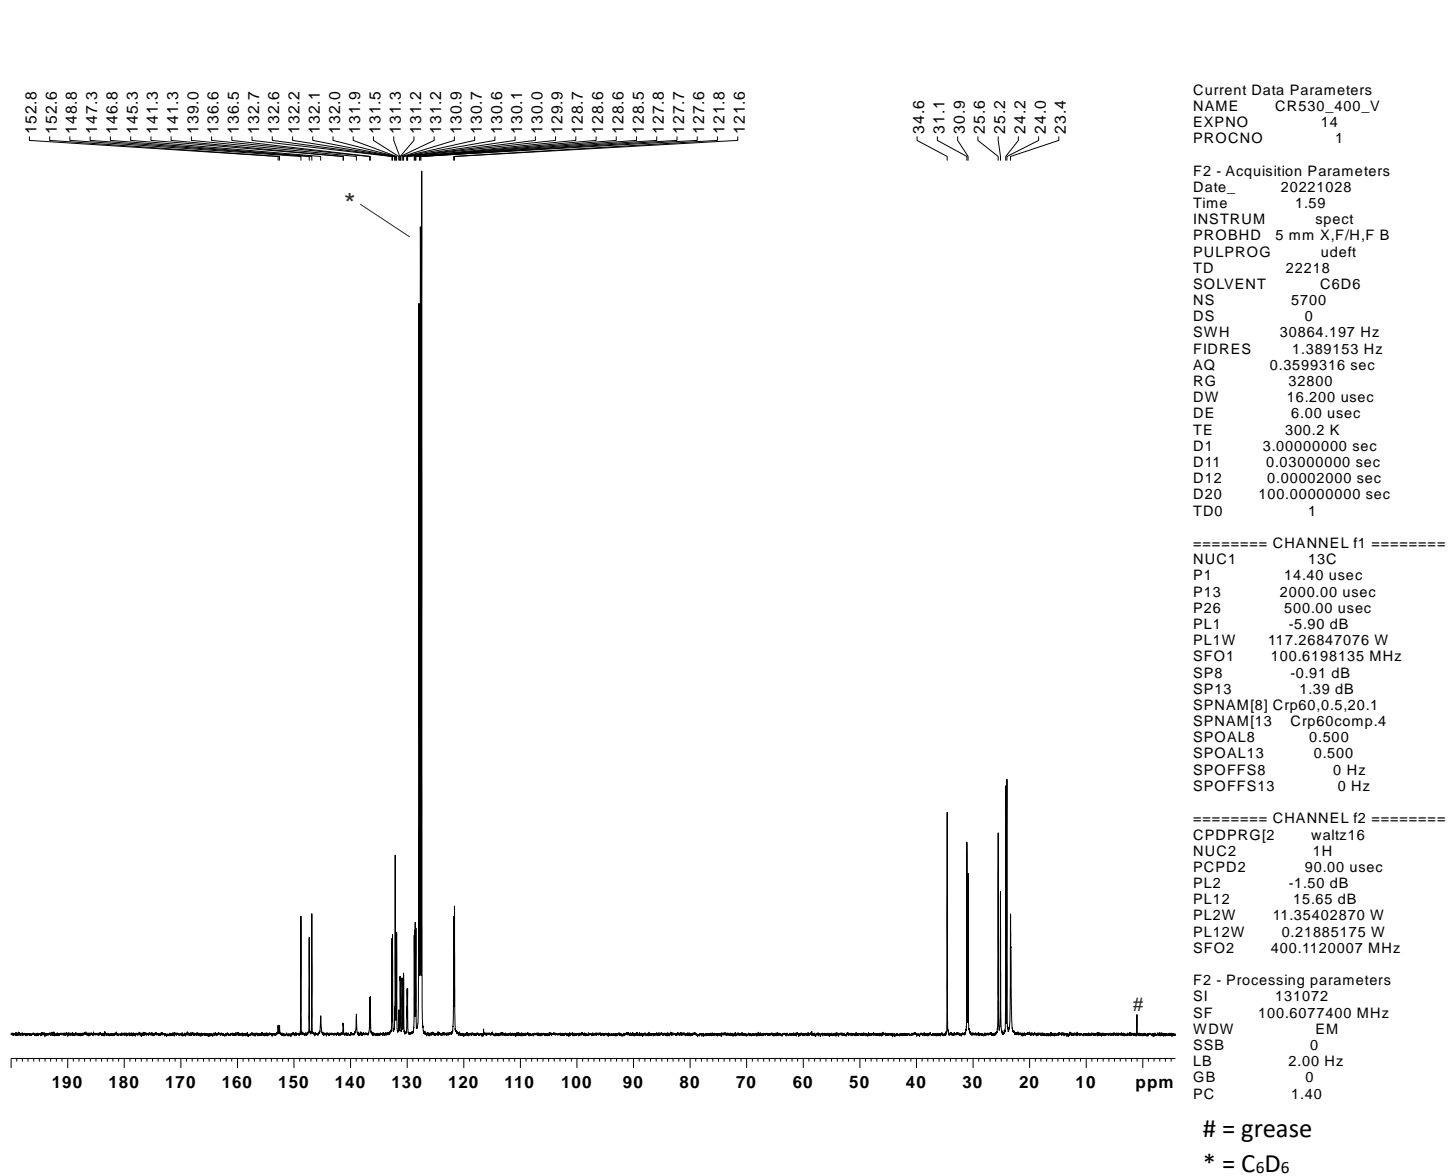Figure SI17. <sup>13</sup>C{<sup>1</sup>H} NMR spectrum of compound 5.

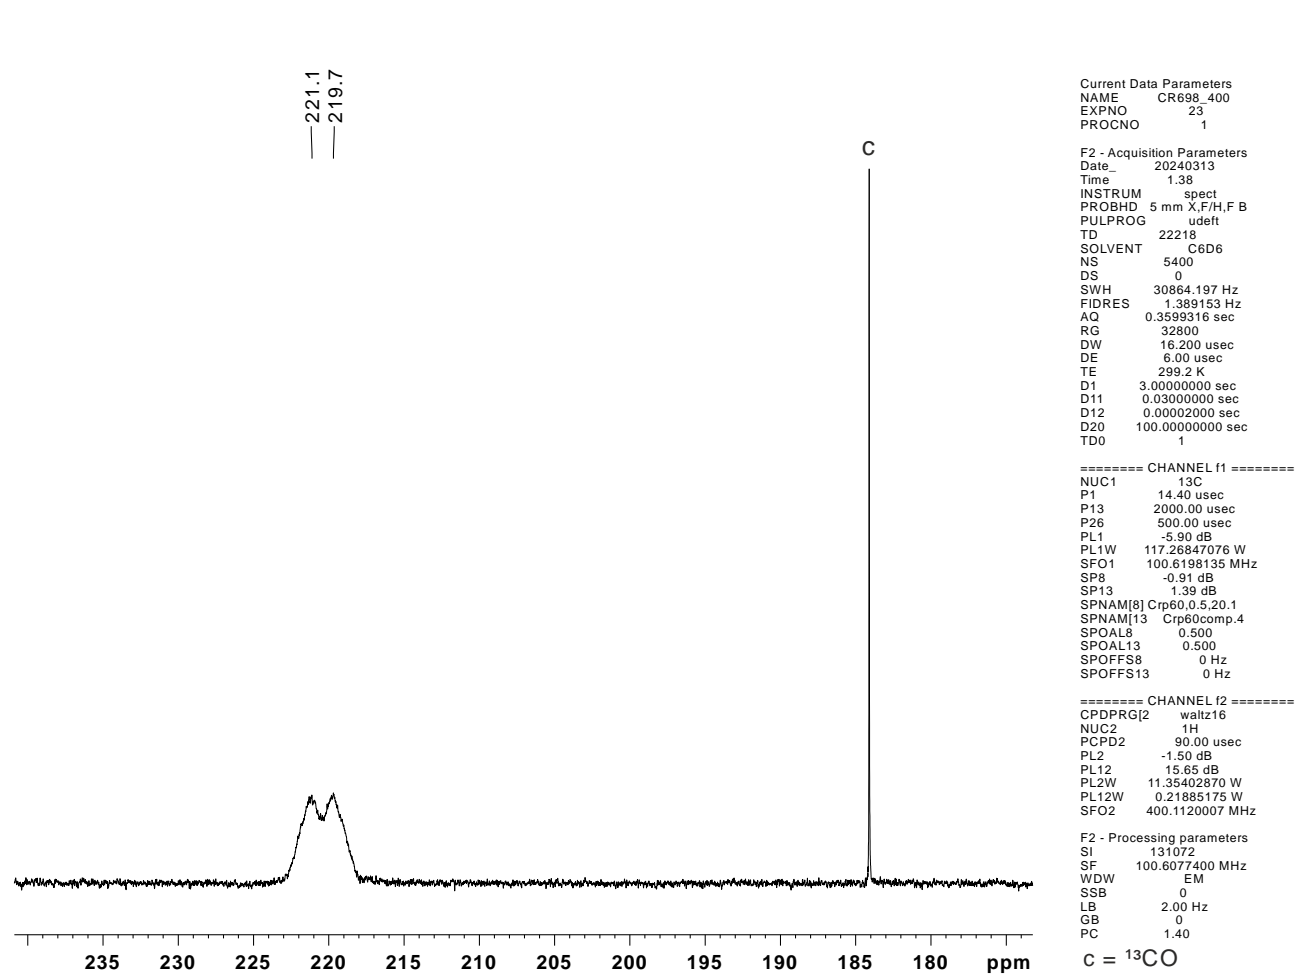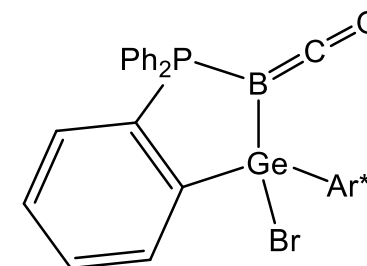

Figure SI18.  $^{13}\text{C}\{^1\text{H}\}$  NMR spectrum of compound **5** synthesized with (99.5%)  $^{13}\text{C}\text{O}$ .



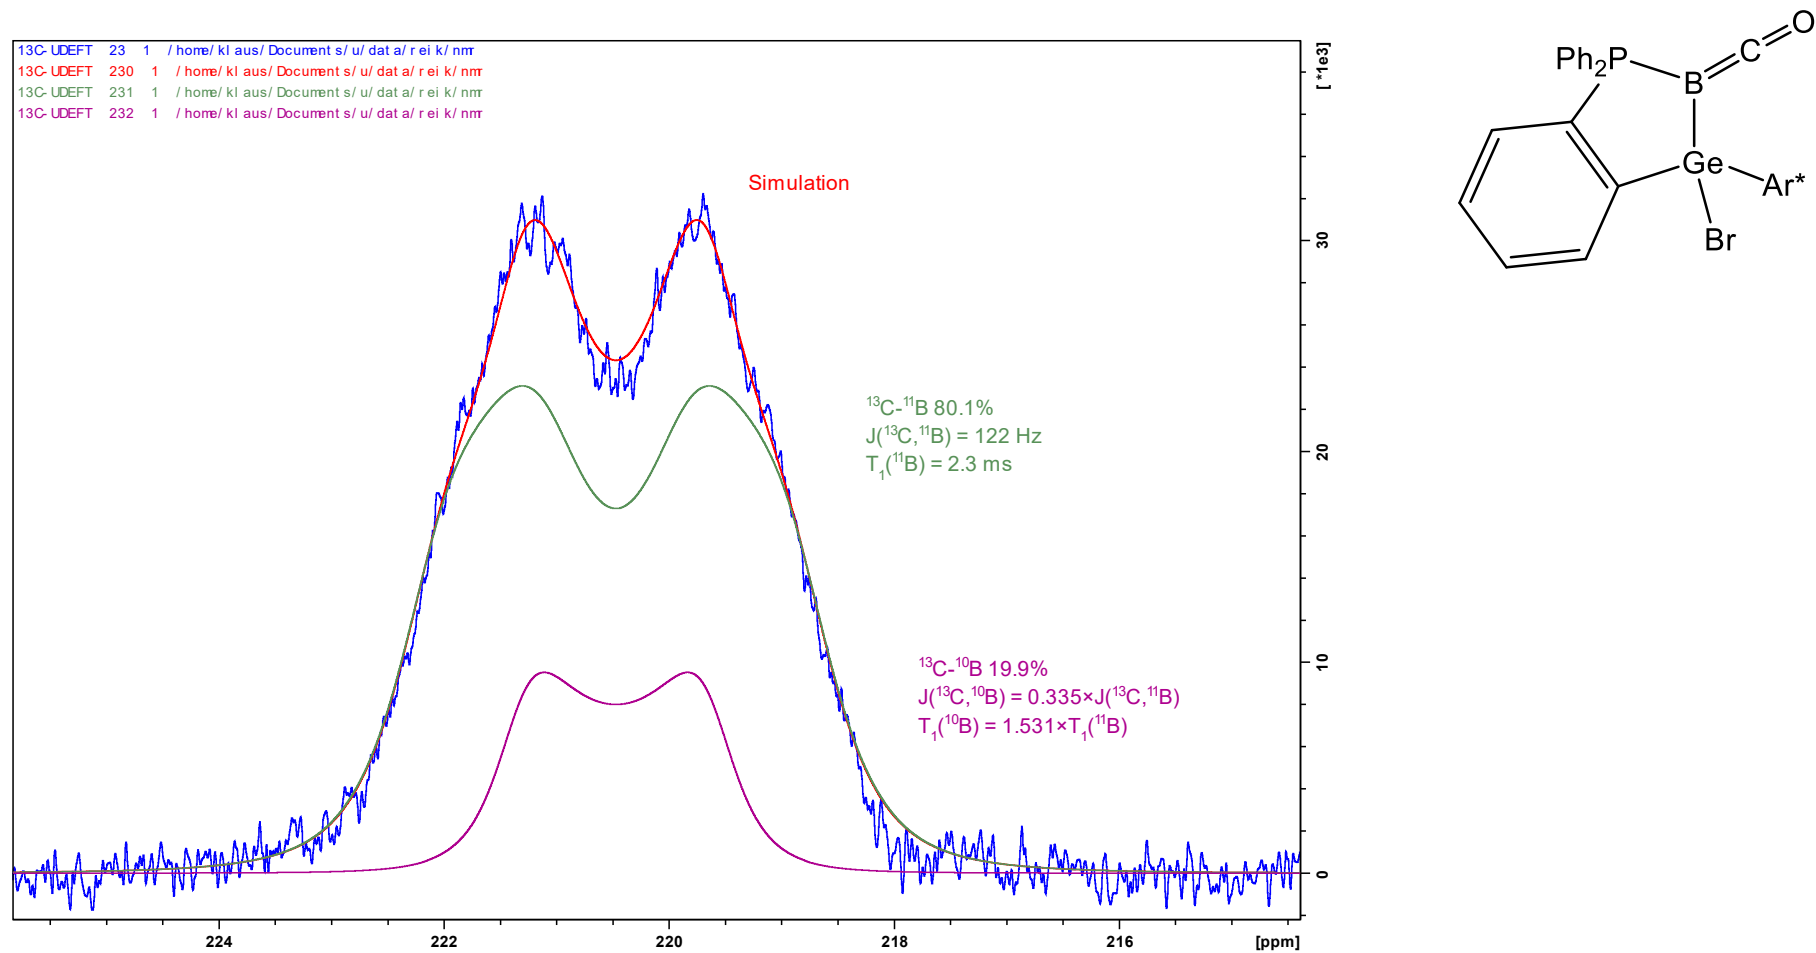

Figure SI19. Simulation of  $^{13}\text{C}\{^1\text{H}\}$  NMR signal at 221 ppm using the parameters given in the figure for the two isotopologues,  $^{13}\text{C}\text{-}^{11}\text{B}$  and  $^{13}\text{C}\text{-}^{10}\text{B}$ , in the software WSolids.<sup>9</sup>

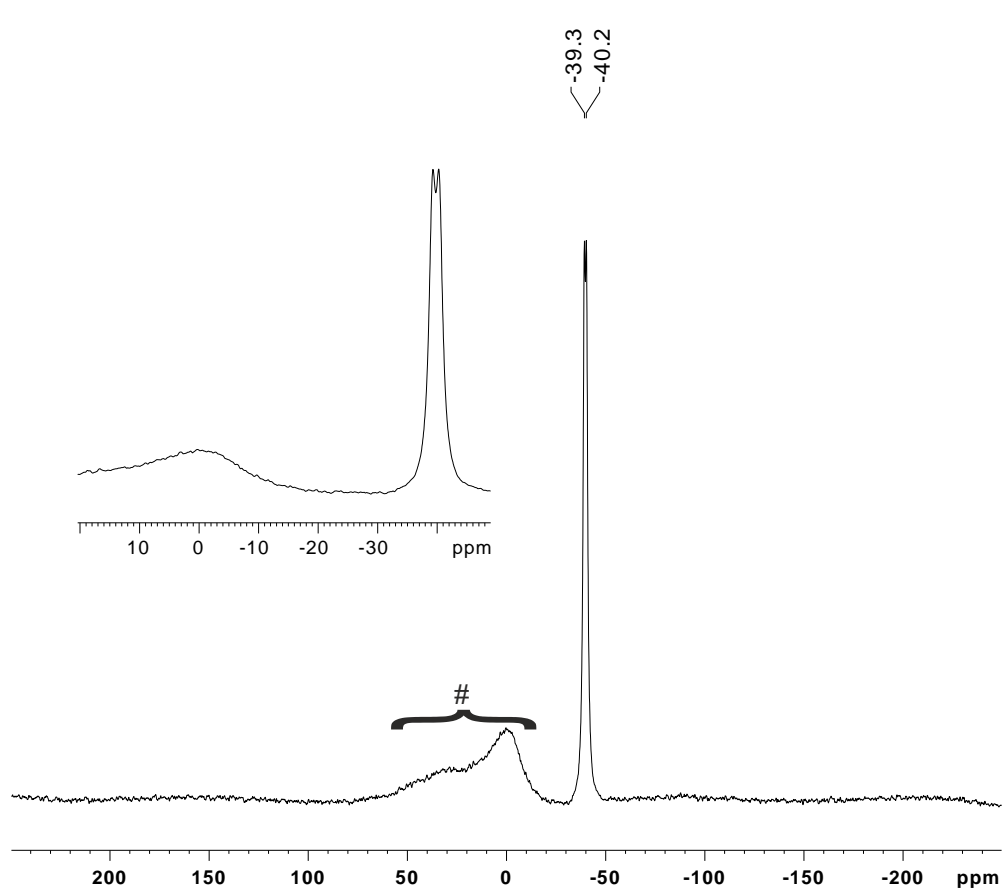

Current Data Parameters  
 NAME CR530\_400\_V  
 EXPNO 11  
 PROCNO 1

F2 - Acquisition Parameters  
 Date\_ 20221027  
 Time 16.29  
 INSTRUM spect  
 PROBHD 5 mm X,F/H,F B  
 PULPROG zgbsig  
 TD 8192  
 SOLVENT C6D6  
 NS 1024  
 DS 0  
 SWH 64102.562 Hz  
 FIDRES 7.825020 Hz  
 AQ 0.0638976 sec  
 RG 2050  
 DW 7.800 usec  
 DE 6.00 usec  
 TE 299.2 K  
 D1 0.10000000 sec  
 D11 0.03000000 sec  
 TD0 1

===== CHANNEL f1 =====  
 NUC1  $^{11}\text{B}$   
 P1 15.00 usec  
 P2 30.00 usec  
 PL1 -3.00 dB  
 SFO1 128.3711884 MHz

===== CHANNEL f2 =====  
 CPDPRG2 garp  
 NUC2  $^1\text{H}$   
 PCPD2 90.00 usec  
 PL2 -1.50 dB  
 PL12 15.65 dB  
 PL2W 11.35402870 W  
 PL12W 0.21885175 W  
 SFO2 400.1108002 MHz

F2 - Processing parameters  
 SI 8192  
 SF 128.3711880 MHz  
 WDW EM  
 SSB 0  
 LB 50.00 Hz  
 GB 0  
 PC 1.40

# = glass background signal

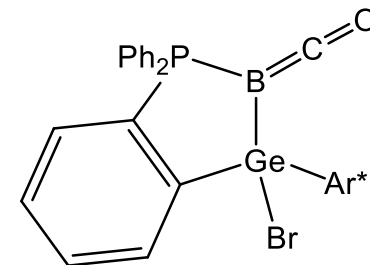

Figure SI20.  $^{11}\text{B}\{^1\text{H}\}$  NMR spectrum of compound 5.

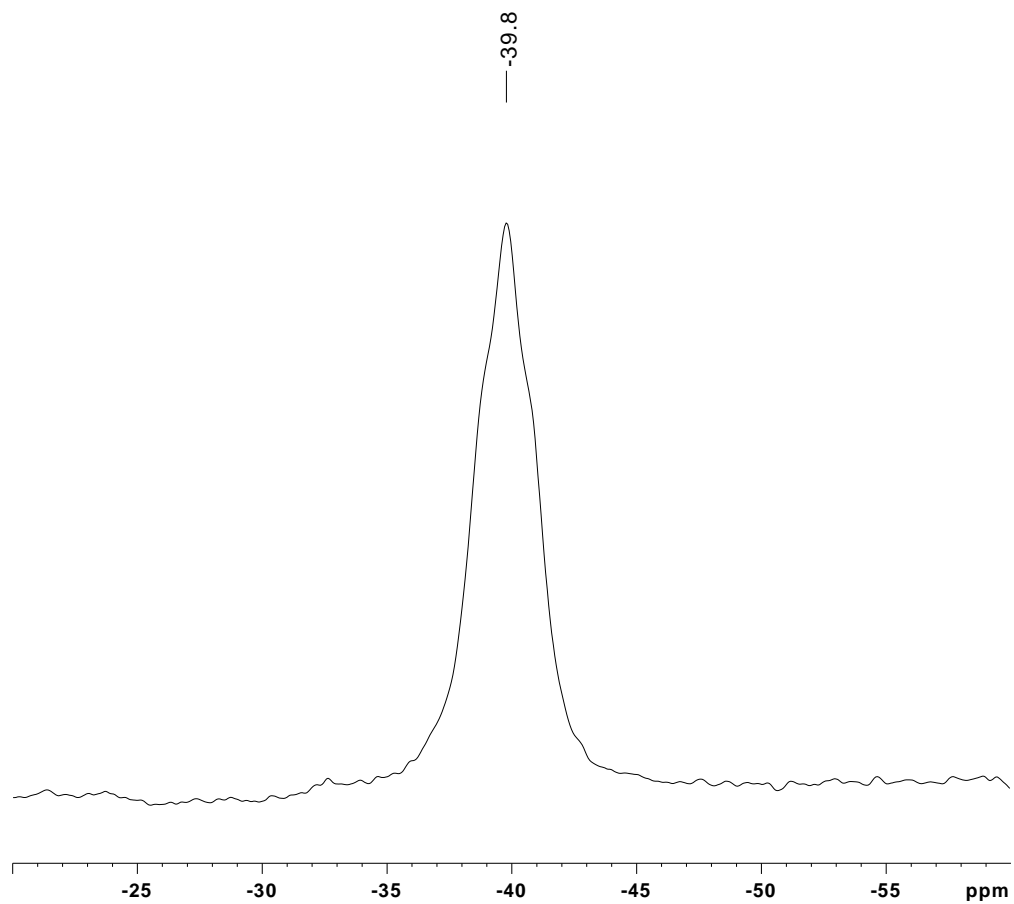

Current Data Parameters  
 NAME CR698\_400  
 EXPNO 21  
 PROCNO 1

F2 - Acquisition Parameters  
 Date\_ 20240312  
 Time 19.06  
 INSTRUM spect  
 PROBHD 5 mm X,F/H,F B  
 PULPROG zgbsig  
 TD 8192  
 SOLVENT C6D6  
 NS 1024  
 DS 0  
 SWH 64102.562 Hz  
 FIDRES 7.825020 Hz  
 AQ 0.0638976 sec  
 RG 2050  
 DW 7.800 usec  
 DE 6.00 usec  
 TE 299.2 K  
 D1 0.10000000 sec  
 D11 0.03000000 sec  
 TD0 1

===== CHANNEL f1 =====  
 NUC1 11B  
 P1 15.00 usec  
 P2 30.00 usec  
 PL1 -3.00 dB  
 SFO1 128.3711884 MHz

===== CHANNEL f2 =====  
 CPDPRG2 garp  
 NUC2 1H  
 PCPD2 90.00 usec  
 PL2 -1.50 dB  
 PL12 15.65 dB  
 PL2W 11.35402870 W  
 PL12W 0.21885175 W  
 SFO2 400.1108002 MHz

F2 - Processing parameters  
 SI 8192  
 SF 128.3711880 MHz  
 WDW EM  
 SSB 0  
 LB 50.00 Hz  
 GB 0  
 PC 1.40

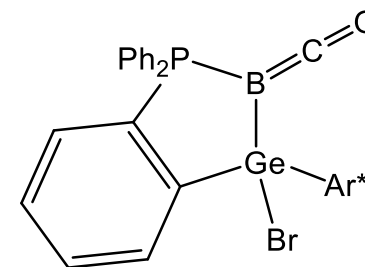

Figure SI21.  $^{11}\text{B}\{^1\text{H}\}$  NMR spectrum of compound **5** synthesized with (> 99%)  $^{13}\text{C}$ O.

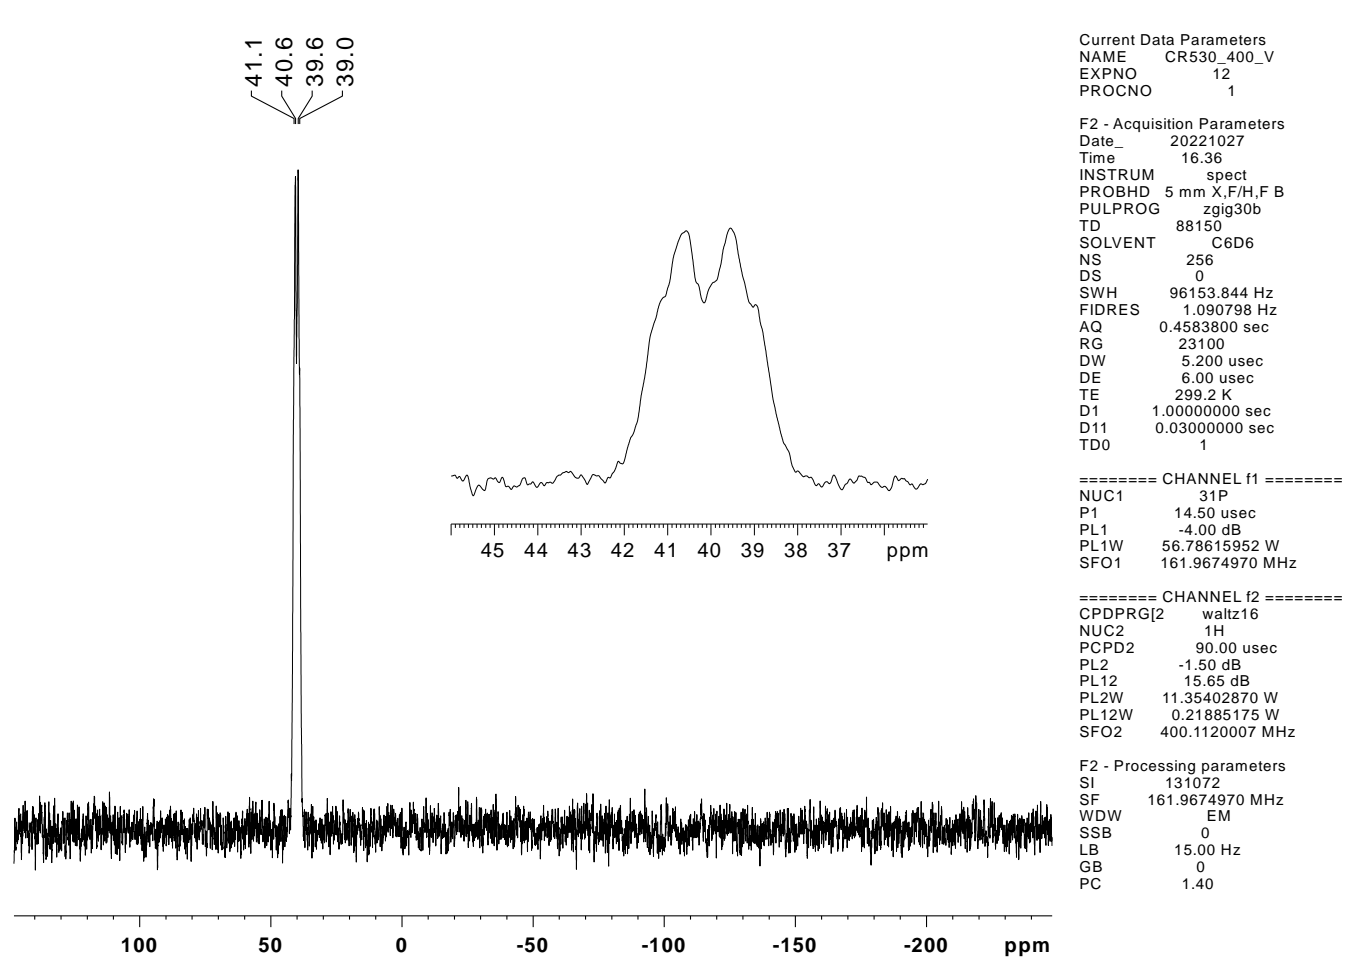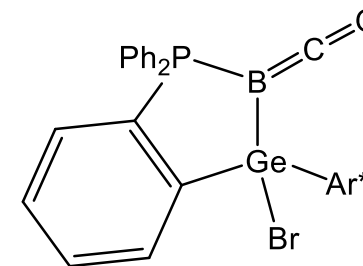

Figure SI22.  $^{31}\text{P}\{^1\text{H}\}$  NMR spectrum of compound 5.

NMR spectra of compound 6.

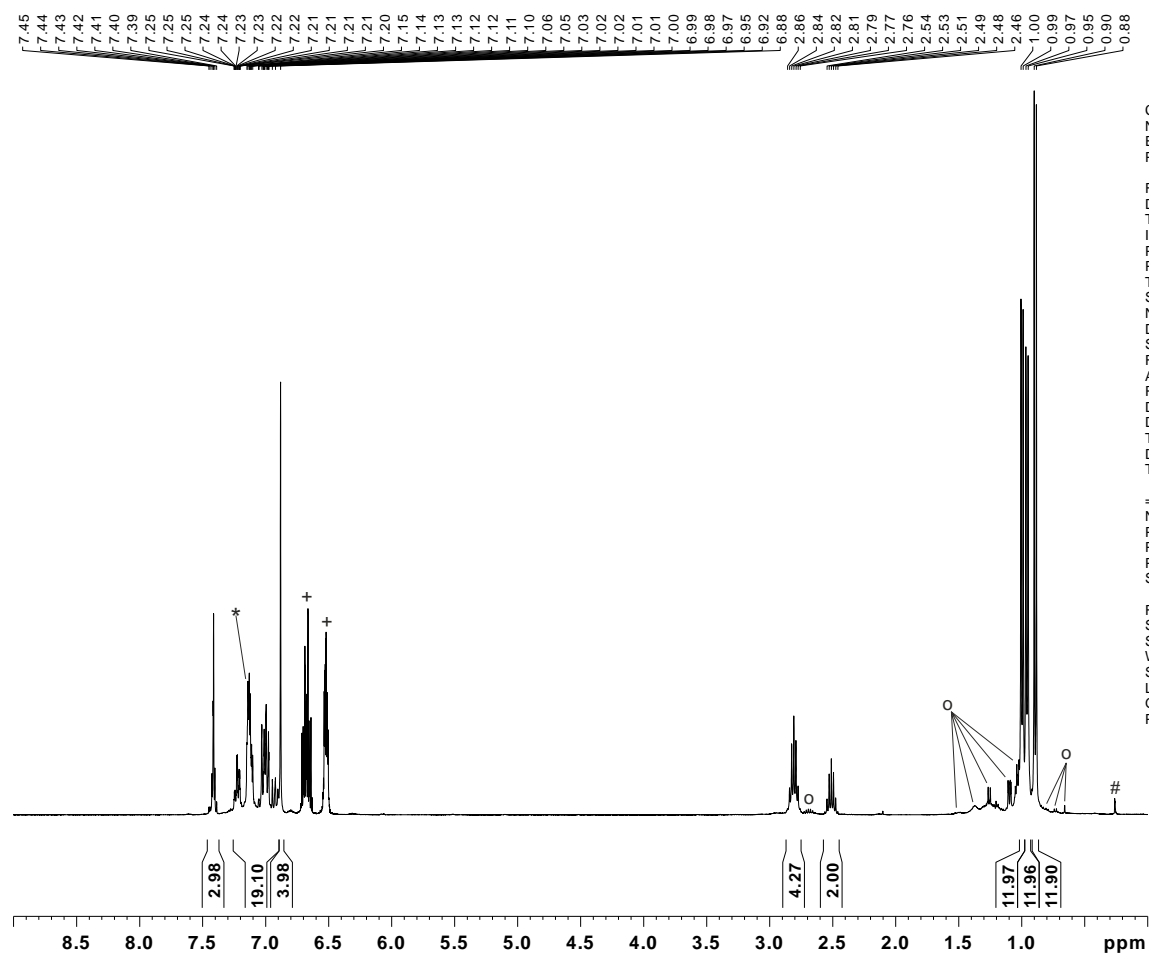

Current Data Parameters

NAME CR673\_400  
EXPNO 20  
PROCNO 1

F2 - Acquisition Parameters

Date\_ 20231103  
Time 16.40  
INSTRUM spect  
PROBHD 5 mm X/F/H.F B  
PULPROG zg30  
TD 52656  
SOLVENT C6D6  
NS 16  
DS 0  
SWH 8305.647 Hz  
FIDRES 0.157734 Hz  
AQ 3.1698911 sec  
RG 32  
DW 60.200 usec  
DE 6.00 usec  
TE 299.2 K  
D1 1.00000000 sec  
TD0 1

===== CHANNEL f1 =====

NUC1 1H  
P1 12.50 usec  
PL1 -1.50 dB  
PL1W 11.35402870 W  
SFO1 400.1120007 MHz

F2 - Processing parameters

SI 65536  
SF 400.1100000 MHz  
WDW EM  
SSB 0  
LB 0 Hz  
GB 0  
PC 1.00

\* = C<sub>6</sub>D<sub>5</sub>H

# = grease

+ = *o*-C<sub>6</sub>H<sub>4</sub>F<sub>2</sub>

o = impurity

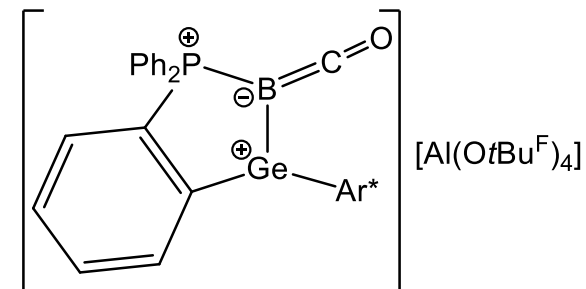Figure SI23. <sup>1</sup>H NMR spectrum of compound 6.

S38

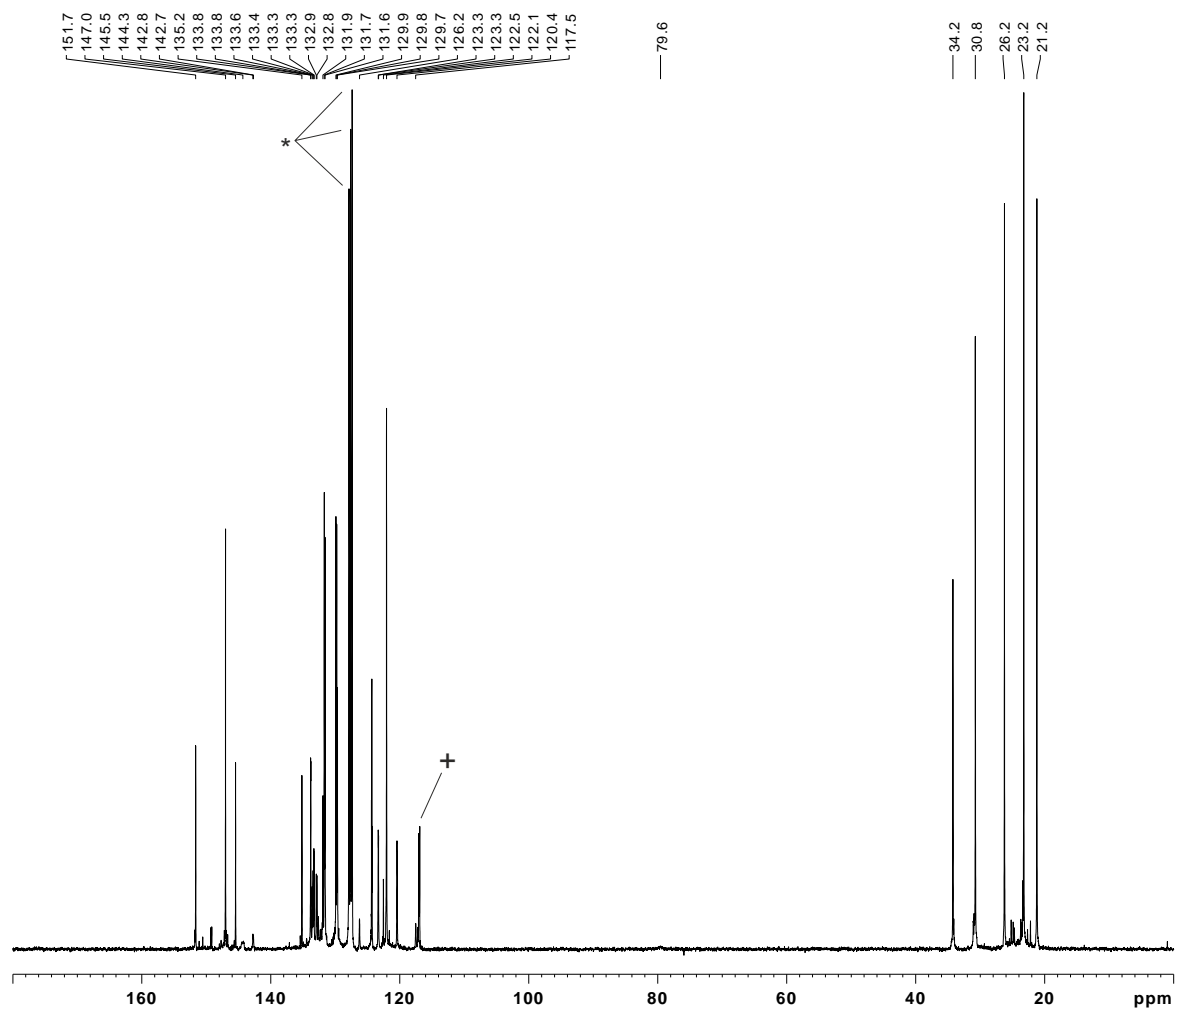

Current Data Parameters  
 NAME CR673\_400  
 EXPNO 24  
 PROCNO 1

F2 - Acquisition Parameters  
 Date\_ 20231104  
 Time 1.57  
 INSTRUM spect  
 PROBHD 5 mm X,F/H,F B  
 PULPROG udeft  
 TD 22218  
 SOLVENT C6D6  
 NS 5700  
 DS 0  
 SWH 30864.197 Hz  
 FIDRES 1.389153 Hz  
 AQ 0.3599316 sec  
 RG 32800  
 DW 16.200 usec  
 DE 6.00 usec  
 TE 299.2 K  
 D1 3.00000000 sec  
 D11 0.03000000 sec  
 D12 0.00002000 sec  
 D20 100.00000000 sec  
 TD0 1

===== CHANNEL f1 =====  
 NUC1 13C  
 P1 14.40 usec  
 P13 2000.00 usec  
 P26 500.00 usec  
 PL1 -5.90 dB  
 PL1W 117.26847076 W  
 SFO1 100.6198135 MHz  
 SP8 -0.91 dB  
 SP13 1.39 dB  
 SPNAM[8] Crp60,0.5,20.1  
 SPNAM[13] Crp60comp.4  
 SPOAL8 0.500  
 SPOAL13 0.500  
 SPOFFS8 0 Hz  
 SPOFFS13 0 Hz

===== CHANNEL f2 =====  
 CPDPRG[2] waltz16  
 NUC2 1H  
 PCPD2 90.00 usec  
 PL2 -1.50 dB  
 PL12 15.65 dB  
 PL2W 11.35402870 W  
 PL12W 0.21885175 W  
 SFO2 400.1120007 MHz

F2 - Processing parameters  
 SI 131072  
 SF 100.6077400 MHz  
 WDW EM  
 SSB 0  
 LB 2.00 Hz  
 GB 0  
 PC 1.40

+ = *o*-C<sub>6</sub>H<sub>4</sub>F<sub>2</sub>

\* = C<sub>6</sub>D<sub>6</sub>

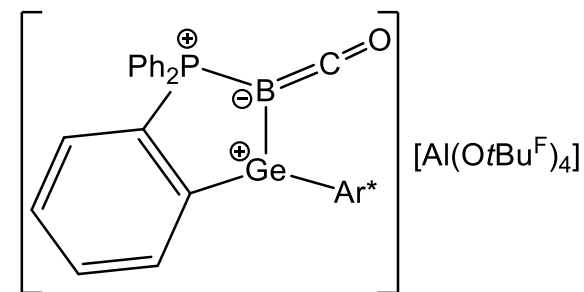

Figure SI24. <sup>13</sup>C{<sup>1</sup>H} NMR spectrum of compound 6.

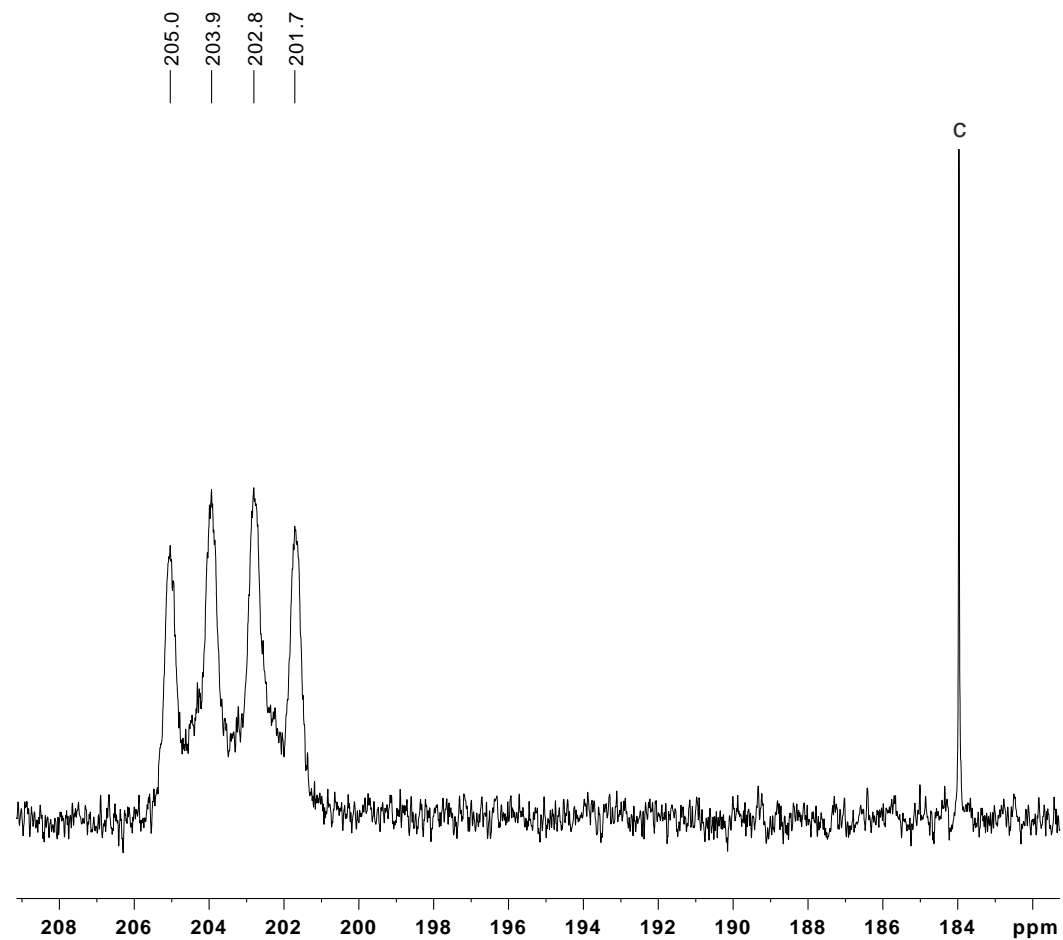

Current Data Parameters  
 NAME CR700\_400\_2  
 EXPNO 14  
 PROCNO 1

F2 - Acquisition Parameters  
 Date\_ 20240316  
 Time 5.20  
 INSTRUM spect  
 PROBHD 5 mm X,F/H,F B  
 PULPROG udeflt  
 TD 22218  
 SOLVENT C6D6  
 NS 8900  
 DS 0  
 SWH 30864.197 Hz  
 FIDRES 1.389153 Hz  
 AQ 0.3599316 sec  
 RG 32800  
 DW 16.200 usec  
 DE 6.00 usec  
 TE 299.2 K  
 D1 3.00000000 sec  
 D11 0.03000000 sec  
 D12 0.00002000 sec  
 D20 100.00000000 sec  
 TD0 1

===== CHANNEL f1 =====  
 NUC1 13C  
 P1 14.40 usec  
 P13 2000.00 usec  
 P26 500.00 usec  
 PL1 -5.90 dB  
 PL1W 117.26847076 W  
 SFO1 100.6198135 MHz  
 SP8 -0.91 dB  
 SP13 1.39 dB  
 SPNAM[8] Crp60,0.5,20.1  
 SPNAM[13] Crp60comp.4  
 SPOAL8 0.500  
 SPOAL13 0.500  
 SPOFFS8 0 Hz  
 SPOFFS13 0 Hz

===== CHANNEL f2 =====  
 CPDPRG[2] waltz16  
 NUC2 1H  
 PCPD2 90.00 usec  
 PL2 -1.50 dB  
 PL12 15.65 dB  
 PL2W 11.35402870 W  
 PL12W 0.21885175 W  
 SFO2 400.1120007 MHz

F2 - Processing parameters  
 SI 131072  
 SF 100.6077400 MHz  
 WDW EM  
 SSB 0  
 LB 2.00 Hz  
 GB 0  
 PC 1.40

C =  $^{13}\text{C}\text{O}$

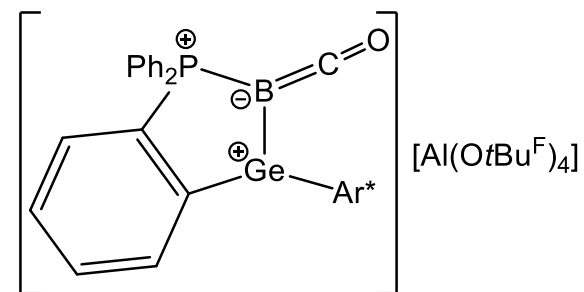

Figure SI25.  $^{13}\text{C}\{^1\text{H}\}$  NMR spectrum of compound **6** synthesized with (> 99%)  $^{13}\text{C}\text{O}$ .

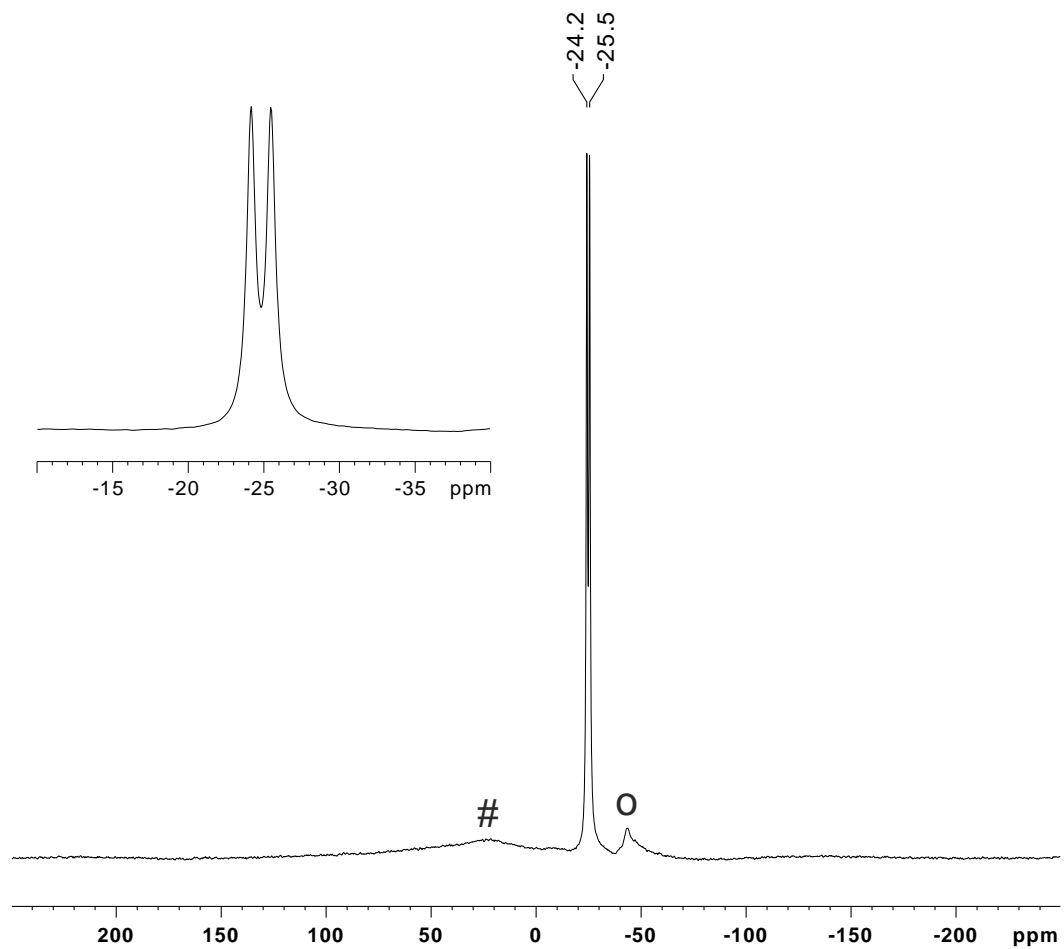

Current Data Parameters  
 NAME CR673\_400  
 EXPNO 11  
 PROCNO 1

F2 - Acquisition Parameters  
 Date\_ 20231103  
 Time 15.08  
 INSTRUM spect  
 PROBHD 5 mm X,F/H,F B  
 PULPROG zgbsig  
 TD 8192  
 SOLVENT C6D6  
 NS 1024  
 DS 0  
 SWH 64102.562 Hz  
 FIDRES 7.825020 Hz  
 AQ 0.0638976 sec  
 RG 1290  
 DW 7.800 usec  
 DE 6.00 usec  
 TE 299.2 K  
 D1 0.10000000 sec  
 D11 0.03000000 sec  
 TD0 1

===== CHANNEL f1 =====  
 NUC1 11B  
 P1 15.00 usec  
 P2 30.00 usec  
 PL1 -3.00 dB  
 SFO1 128.3711884 MHz

===== CHANNEL f2 =====  
 CPDPRG2 garp  
 NUC2 1H  
 PCPD2 90.00 usec  
 PL2 -1.50 dB  
 PL12 15.65 dB  
 PL2W 11.35402870 W  
 PL12W 0.21885175 W  
 SFO2 400.1108002 MHz

F2 - Processing parameters  
 SI 8192  
 SF 128.3711880 MHz  
 WDW EM  
 SSB 0  
 LB 50.00 Hz  
 GB 0  
 PC 1.40

o = impurity

# = glass background signal

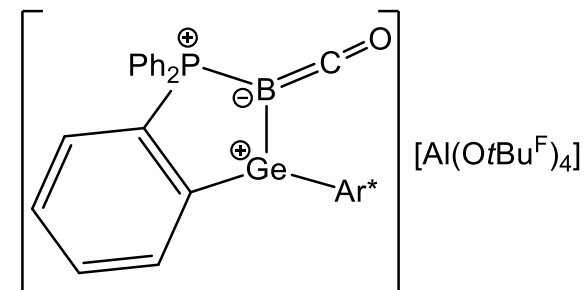

Figure SI26.  $^{11}\text{B}\{^1\text{H}\}$  NMR spectrum of compound **6**.



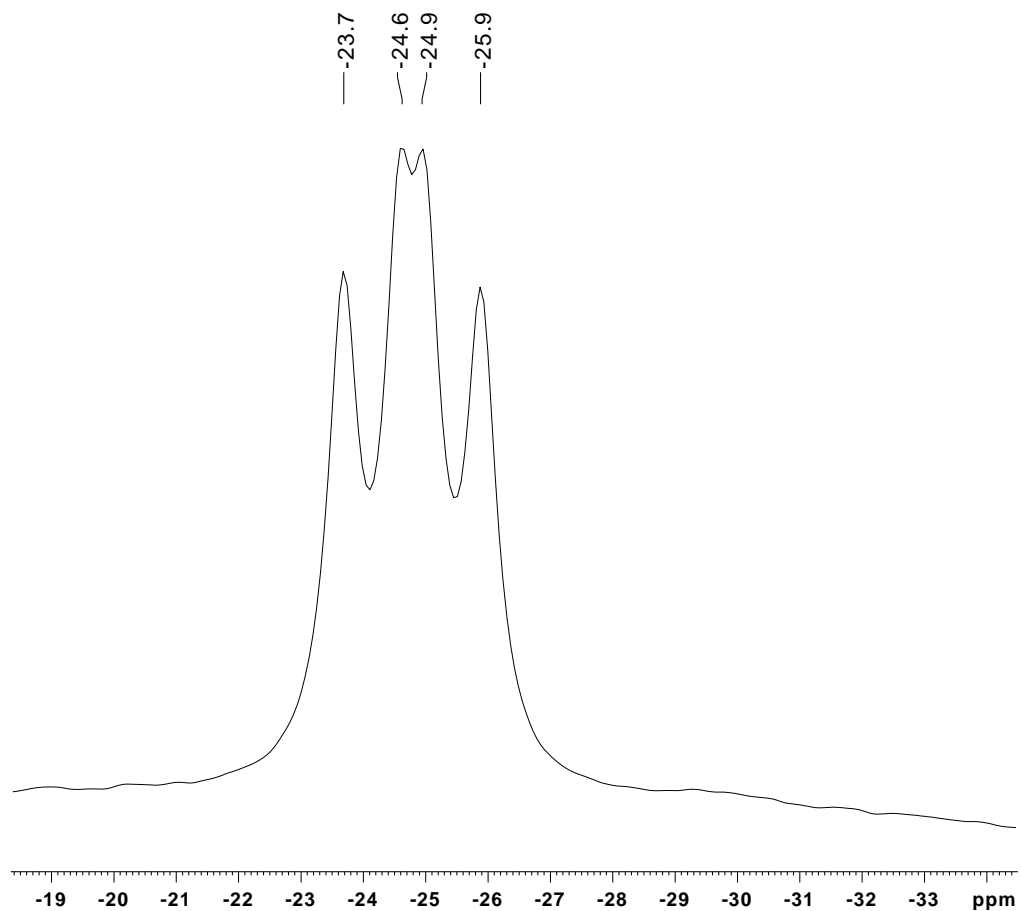

Current Data Parameters  
 NAME CR700\_400  
 EXPNO 15  
 PROCNO 1

F2 - Acquisition Parameters  
 Date\_ 20240316  
 Time 6.29  
 INSTRUM spect  
 PROBHD 5 mm X,F/H,F B  
 PULPROG zgbsig  
 TD 8192  
 SOLVENT C6D6  
 NS 20480  
 DS 0  
 SWH 64102.562 Hz  
 FIDRES 7.825020 Hz  
 AQ 0.0638976 sec  
 RG 1820  
 DW 7.800 usec  
 DE 6.00 usec  
 TE 299.2 K  
 D1 0.10000000 sec  
 D11 0.03000000 sec  
 TD0 1

===== CHANNEL f1 =====  
 NUC1 11B  
 P1 15.00 usec  
 P2 30.00 usec  
 PL1 -3.00 dB  
 SFO1 128.3711884 MHz

===== CHANNEL f2 =====  
 CPDPRG[2] garp  
 NUC2 1H  
 PCPD2 90.00 usec  
 PL2 -1.50 dB  
 PL12 15.65 dB  
 PL2W 11.35402870 W  
 PL12W 0.21885175 W  
 SFO2 400.1108002 MHz

F2 - Processing parameters  
 SI 8192  
 SF 128.3711880 MHz  
 WDW EM  
 SSB 0  
 LB 50.00 Hz  
 GB 0  
 PC 1.40

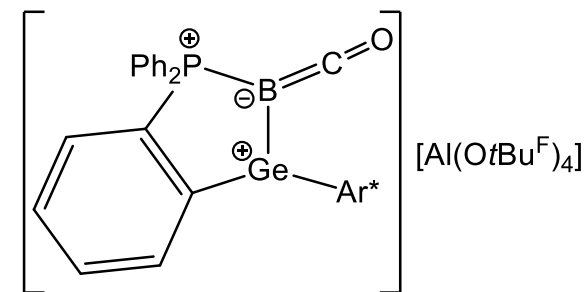

Figure SI27.  $^{11}\text{B}\{^1\text{H}\}$  NMR spectrum of compound **6** synthesized with (> 99%)  $^{13}\text{C}$ .

S42

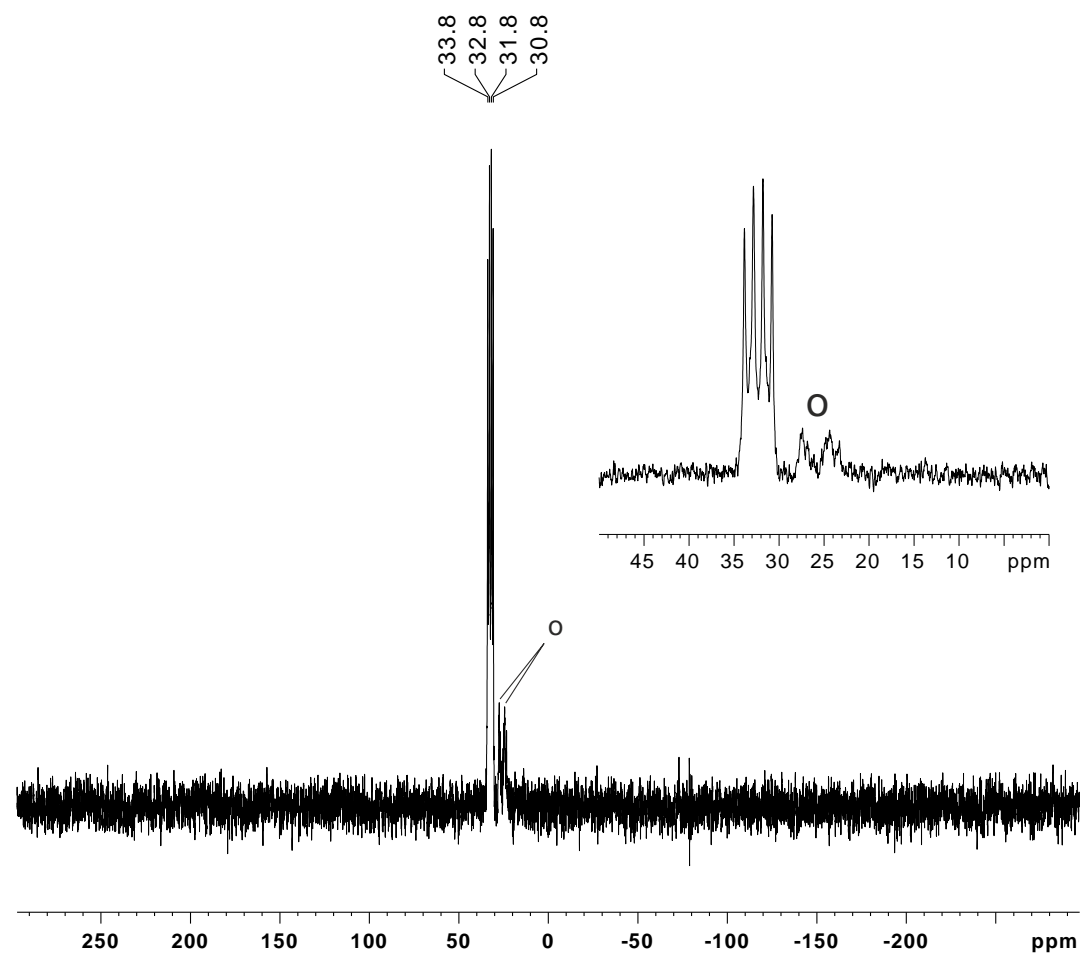

Current Data Parameters  
 NAME CR673\_400  
 EXPNO 22  
 PROCNO 1

F2 - Acquisition Parameters  
 Date\_ 20231106  
 Time 8.30  
 INSTRUM spect  
 PROBHD 5 mm X,F/H,F B  
 PULPROG zgig30b  
 TD 88150  
 SOLVENT C6D6  
 NS 256  
 DS 0  
 SWH 96153.844 Hz  
 FIDRES 1.090798 Hz  
 AQ 0.4583800 sec  
 RG 23100  
 DW 5.200 usec  
 DE 6.00 usec  
 TE 299.2 K  
 D1 1.00000000 sec  
 D11 0.03000000 sec  
 TD0 1

===== CHANNEL f1 =====  
 NUC1 31P  
 P1 14.50 usec  
 PL1 -4.00 dB  
 PL1W 56.78615952 W  
 SFO1 161.9674970 MHz

===== CHANNEL f2 =====  
 CPDPRG[2] waltz16  
 NUC2 1H  
 PCPD2 90.00 usec  
 PL2 -1.50 dB  
 PL12 15.65 dB  
 PL2W 11.35402870 W  
 PL12W 0.21885175 W  
 SFO2 400.1120007 MHz

F2 - Processing parameters  
 SI 131072  
 SF 161.9674970 MHz  
 WDW EM  
 SSB 0  
 LB 10.00 Hz  
 GB 0  
 PC 1.40

O = impurity

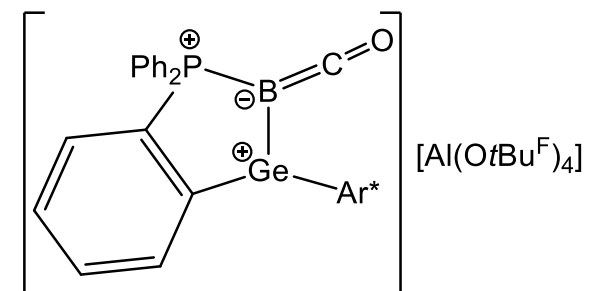

Figure SI28.  $^{31}\text{P}\{^1\text{H}\}$  NMR spectrum of compound 6.

S43

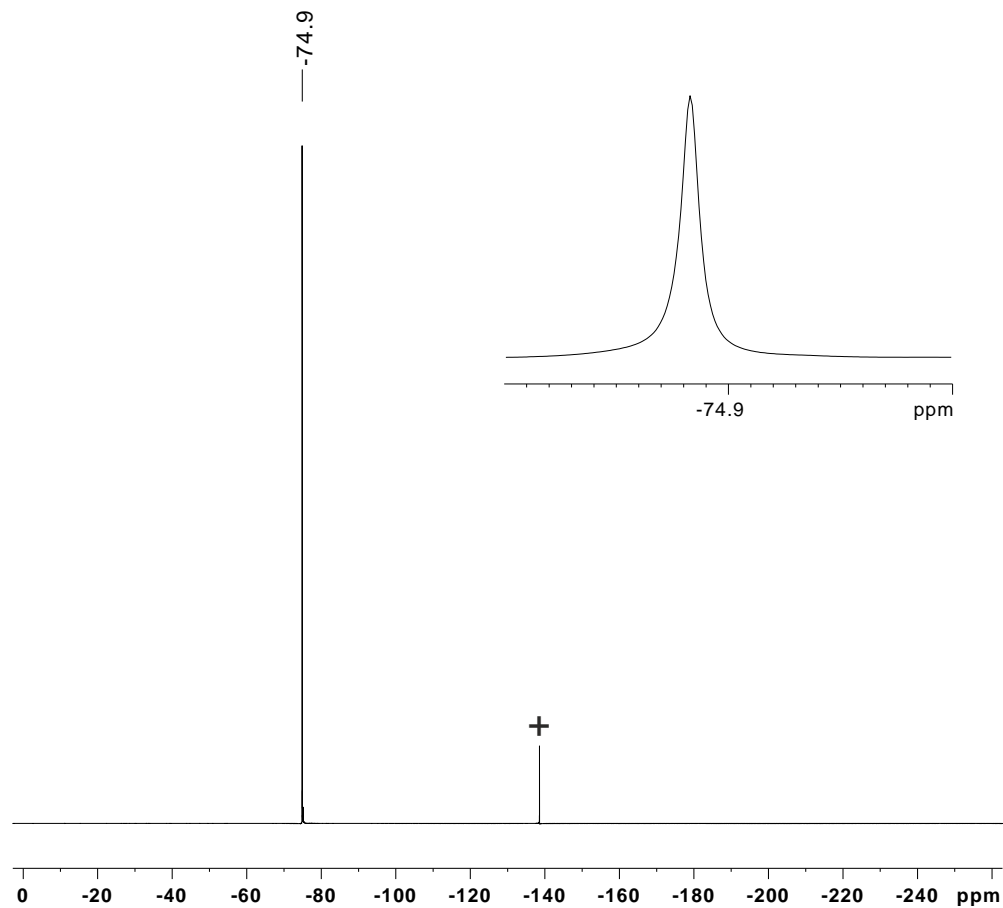

Current Data Parameters  
 NAME CR673\_400  
 EXPNO 13  
 PROCNO 1

F2 - Acquisition Parameters  
 Date\_ 20231103  
 Time 15.11  
 INSTRUM spect  
 PROBHD 5 mm X,F/H,F B  
 PULPROG zgfhigqn  
 TD 131072  
 SOLVENT C6D6  
 NS 32  
 DS 0  
 SWH 100000.000 Hz  
 FIDRES 0.762939 Hz  
 AQ 0.6553600 sec  
 RG 4100  
 DW 5.000 usec  
 DE 6.00 usec  
 TE 299.2 K  
 D1 1.00000000 sec  
 D11 0.03000000 sec  
 D12 0.00002000 sec  
 TD0 1

===== CHANNEL f1 =====  
 NUC1 19F  
 P1 19.70 usec  
 PL1 -6.00 dB  
 PL1W 62.00000000 W  
 SFO1 376.4306030 MHz

===== CHANNEL f2 =====  
 CPDPRG[2] waltz16  
 NUC2 1H  
 PCPD2 90.00 usec  
 PL2 -1.50 dB  
 PL12 15.65 dB  
 PL2W 11.35402870 W  
 PL12W 0.21885175 W  
 SFO2 400.1120007 MHz

F2 - Processing parameters  
 SI 262144  
 SF 376.4795470 MHz  
 WDW EM  
 SSB 0  
 LB 2.00 Hz  
 GB 0  
 PC 1.00

+ = O-C6H4F2

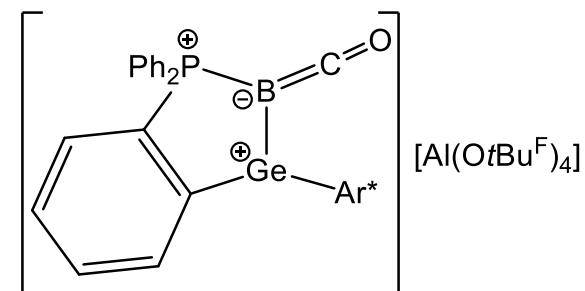

Figure SI29. <sup>19</sup>F{<sup>1</sup>H} NMR spectrum of compound 6.

S44

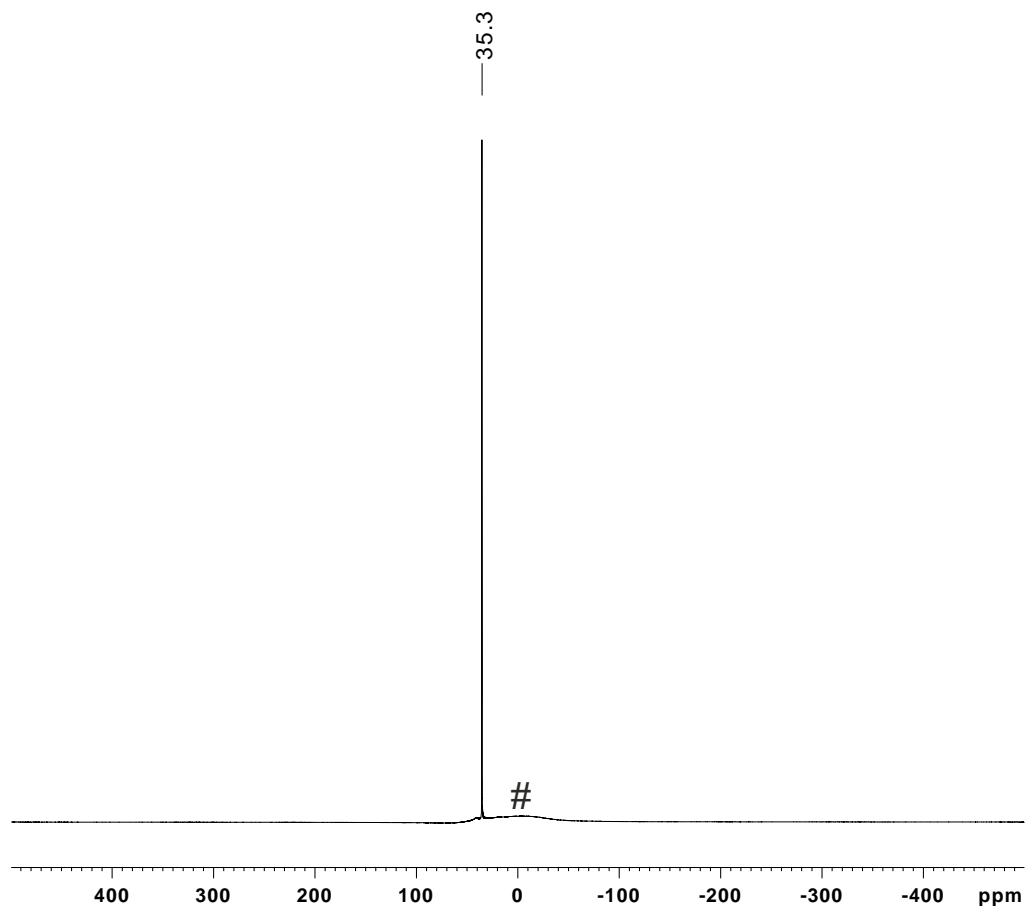

Current Data Parameters  
 NAME CR673\_400  
 EXPNO 15  
 PROCNO 1

F2 - Acquisition Parameters  
 Date\_ 20231103  
 Time 15.19  
 INSTRUM spect  
 PROBHD 5 mm X,F/H,F B  
 PULPROG zgbsig  
 TD 16384  
 SOLVENT C6D6  
 NS 2000  
 DS 0  
 SWH 104166.664 Hz  
 FIDRES 6.357829 Hz  
 AQ 0.0786432 sec  
 RG 575  
 DW 4.800 usec  
 DE 6.00 usec  
 TE 299.2 K  
 D1 0.1000000 sec  
 D11 0.03000000 sec  
 TDO 1

===== CHANNEL f1 =====  
 NUC1 27Al  
 P1 11.13 usec  
 P2 22.26 usec  
 PL1 -3.00 dB  
 SFO1 104.2560990 MHz

===== CHANNEL f2 =====  
 CPDPRG2 garp  
 NUC2 1H  
 PCPD2 90.00 usec  
 PL2 -1.50 dB  
 PL12 15.65 dB  
 PL2W 11.35402870 W  
 PL12W 0.21885175 W  
 SFO2 400.1108002 MHz

F2 - Processing parameters  
 SI 16384  
 SF 104.2560990 MHz  
 WDW EM  
 SSB 0  
 LB 10.00 Hz  
 GB 0  
 PC 1.40

# = background signal

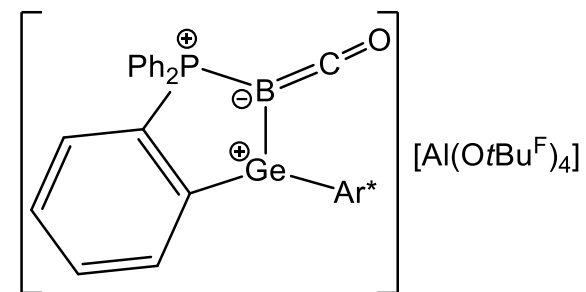

Figure S130.  $^{27}\text{Al}$  NMR spectrum of compound **6**.

NMR spectra of compound 7.

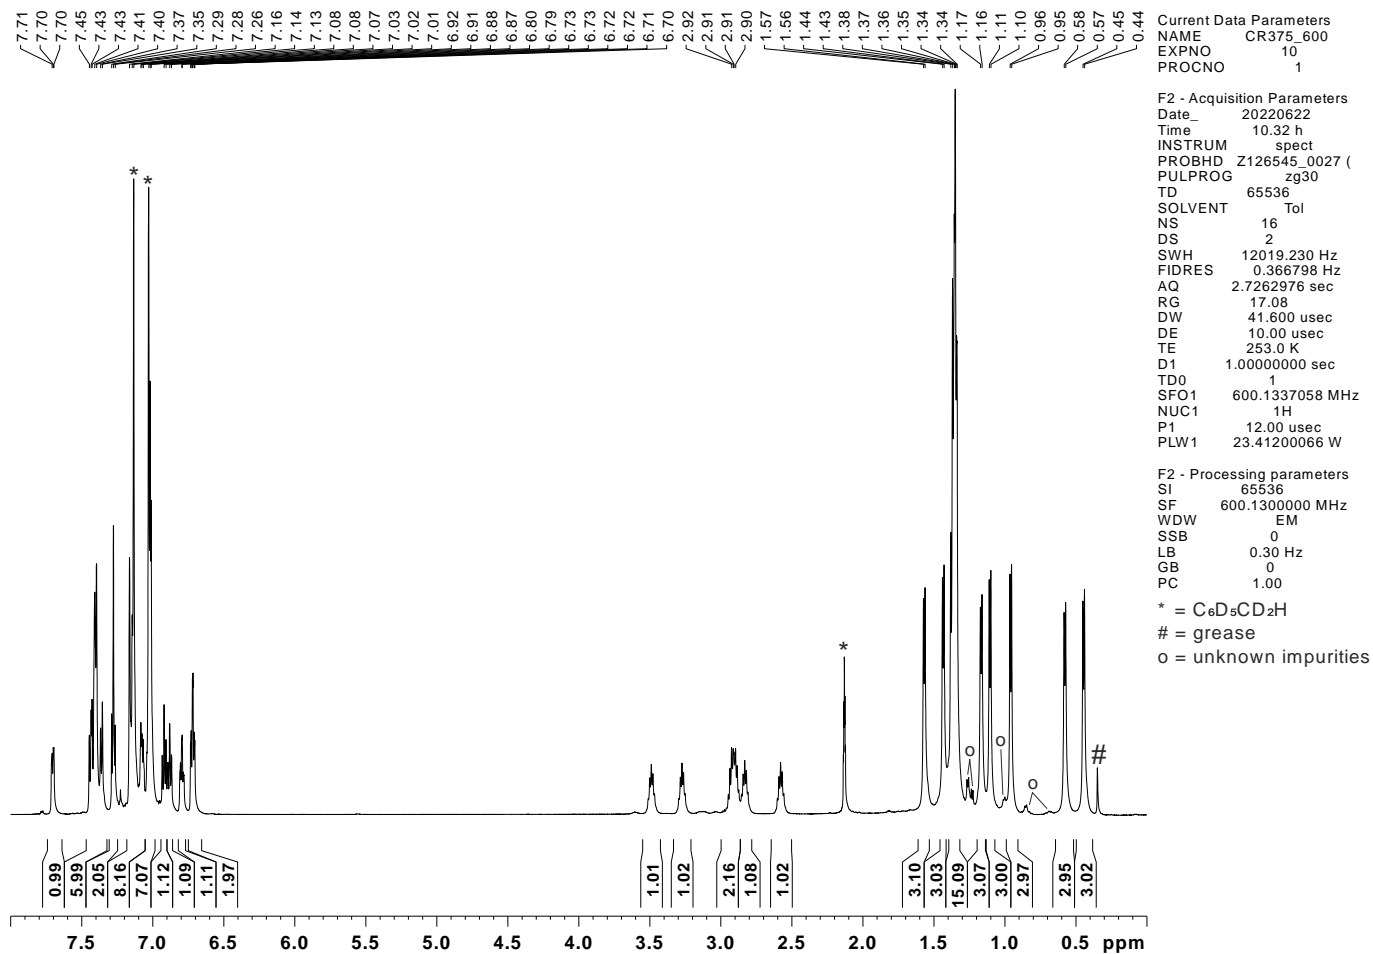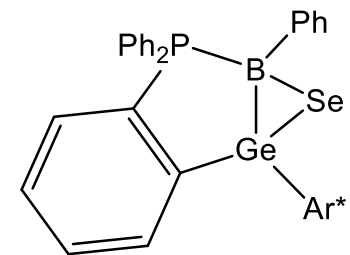Figure SI31. <sup>1</sup>H NMR spectrum of compound 7.

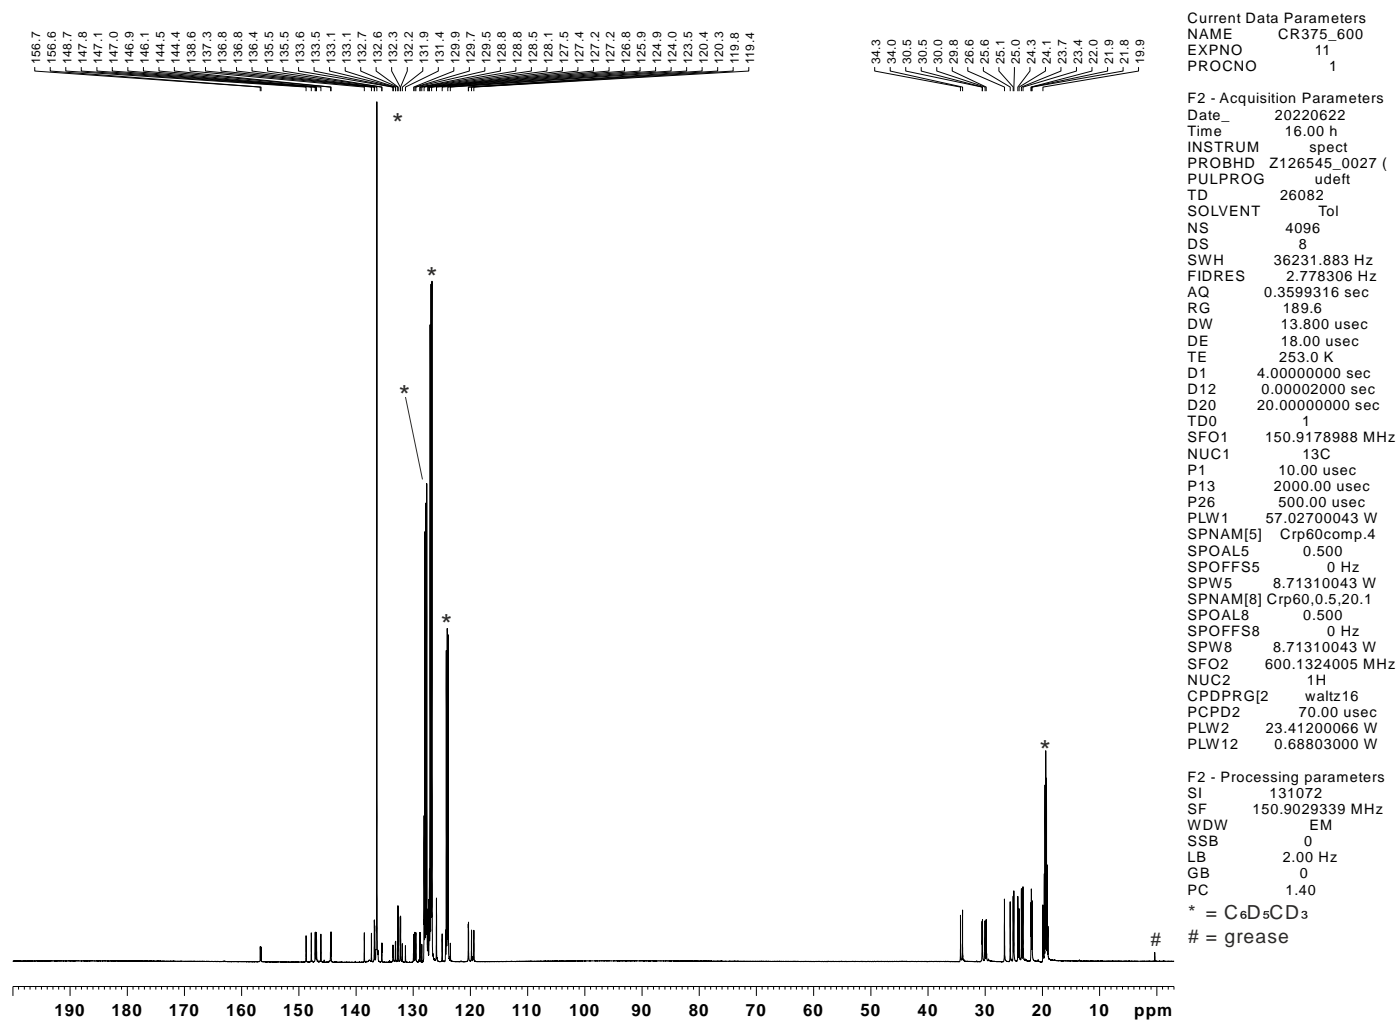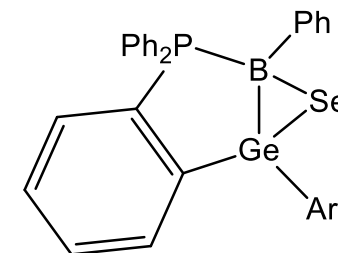Figure SI32.  $^{13}\text{C}\{^1\text{H}\}$  NMR spectrum of compound 7.

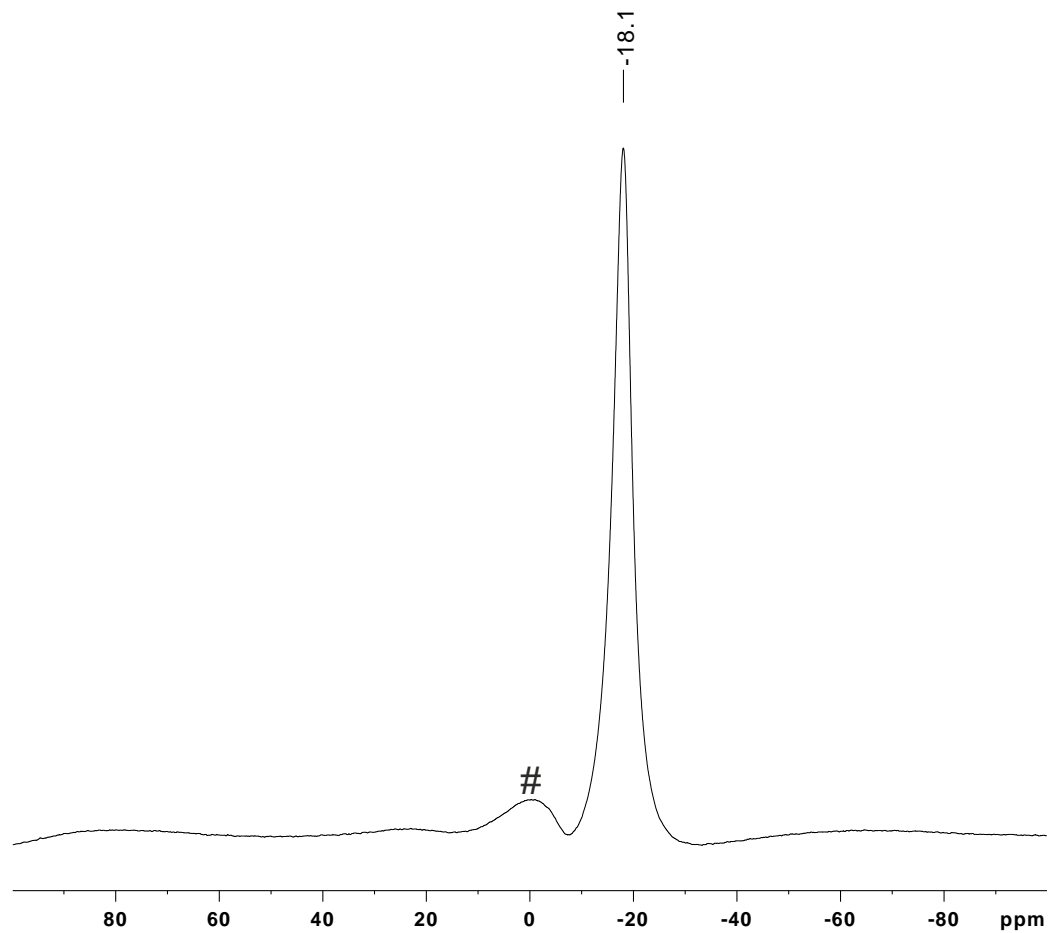

Current Data Parameters  
 NAME CR375\_600  
 EXPNO 14  
 PROCNO 1

F2 - Acquisition Parameters  
 Date\_ 20220622  
 Time 17.28 h  
 INSTRUM spect  
 PROBHD Z126545\_0027 (  
 PULPROG zgbsig  
 TD 16384  
 SOLVENT Tol  
 NS 4096  
 DS 4  
 SWH 38461.539 Hz  
 FIDRES 4.695012 Hz  
 AQ 0.2129920 sec  
 RG 189.6  
 DW 13.000 usec  
 DE 18.00 usec  
 TE 253.0 K  
 D1 0.10000000 sec  
 D11 0.03000000 sec  
 TD0 1  
 SFO1 192.5455530 MHz  
 NUC1 11B  
 P1 19.80 usec  
 P2 39.60 usec  
 PLW1 50.00000000 W  
 SFO2 600.1328206 MHz  
 NUC2 1H  
 CPDPRG[2] waltz16  
 PCPD2 70.00 usec  
 PLW2 23.41200066 W  
 PLW12 0.68803000 W

F2 - Processing parameters  
 SI 16384  
 SF 192.5455530 MHz  
 WDW EM  
 SSB 0  
 LB 50.00 Hz  
 GB 0  
 PC 1.40

# = glass background signal

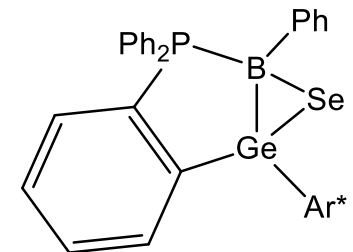

Figure SI33.  $^{11}\text{B}\{^1\text{H}\}$  NMR spectrum of compound **7**.

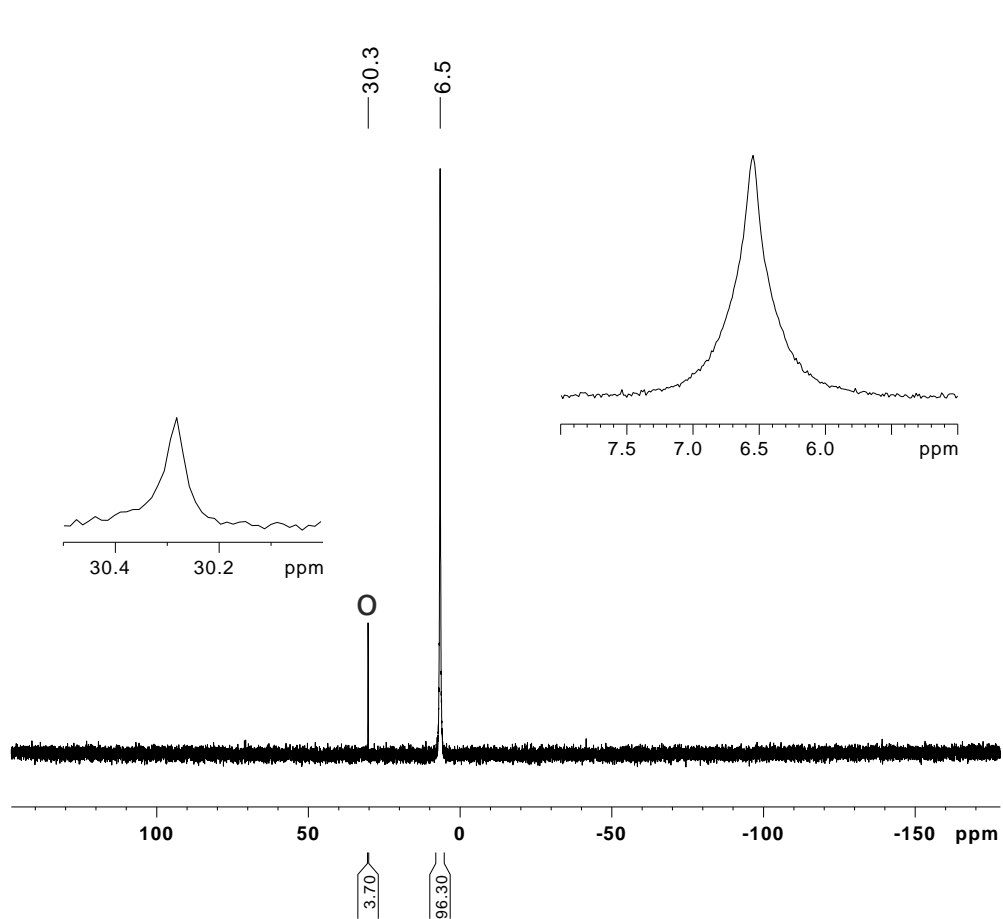

Current Data Parameters  
 NAME CR375\_600  
 EXPNO 13  
 PROCNO 1

F2 - Acquisition Parameters  
 Date\_ 20220622  
 Time 17.02 h  
 INSTRUM spect  
 PROBHD Z126545\_0027 (  
 PULPROG zgpg30  
 TD 65536  
 SOLVENT Tol  
 NS 16  
 DS 4  
 SWH 96153.844 Hz  
 FIDRES 2.934382 Hz  
 AQ 0.3407872 sec  
 RG 189.6  
 DW 5.200 usec  
 DE 18.00 usec  
 TE 253.0 K  
 D1 2.00000000 sec  
 D11 0.03000000 sec  
 TD0 1  
 SFO1 242.9249301 MHz  
 NUC1 31P  
 P1 12.00 usec  
 PLW1 52.43000031 W  
 SFO2 600.1324005 MHz  
 NUC2 1H  
 CPDPRG[2] waltz16  
 PCPD2 70.00 usec  
 PLW2 23.41200066 W  
 PLW12 0.68803000 W  
 PLW13 0.34606999 W

F2 - Processing parameters  
 SI 32768  
 SF 242.9370770 MHz  
 WDW EM  
 SSB 0  
 LB 1.00 Hz  
 GB 0  
 PC 1.40

o = unknown impurity

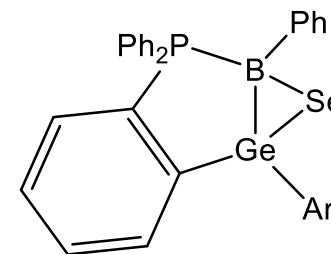

Figure SI34.  $^{31}\text{P}\{^1\text{H}\}$  NMR spectrum of compound 7.



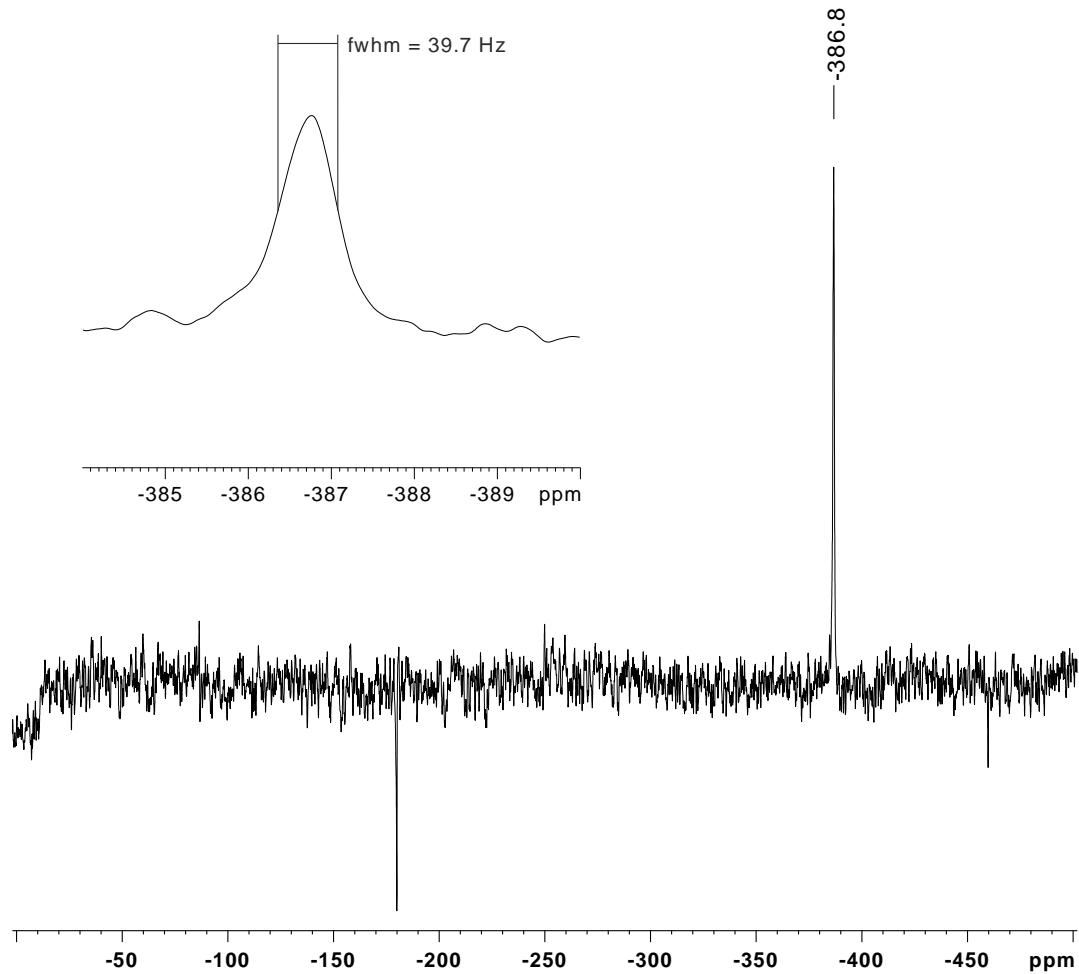

```

Current Data Parameters
NAME      CR374_300
EXPNO    40
PROCNO    1

F2 - Acquisition Parameters
Date_    20240504
Time     0.35 h
INSTRUM  spect
PROBHD   Z104275_0338 (
PULPROG  udeflt
TD        20766
SOLVENT  C6D6
NS        4096
DS         0
SWH       28846.154 Hz
FIDRES    2.778210 Hz
AQ        0.3599440 sec
RG         8.91
DW        17.333 usec
DE         6.50 usec
TE        298.0 K
D1        4.00000000 sec
D12       0.00002000 sec
D20       200.0000000 sec
TD0       1
SFO1      57.2250222 MHz
NUC1      77Se
P1        12.36 usec
P13       2000.00 usec
P26       500.00 usec
PLW1      50.00000000 W
SPNAM[5]  Crp60comp.4
SPOAL5    0
SPOFFS5   0 Hz
SPW5      11.67099953 W
SPNAM[8]  Crp60_0.5_20.1
SPOAL8    0
SPOFFS8   0 Hz
SPW8      11.67099953 W
SFO2      300.1313506 MHz
NUC2      1H
CPDPRG[2] waltz16
PCPD2     90.00 usec
PLW2      8.26509953 W
PLW12     0.20000000 W

F2 - Processing parameters
SI        32768
SF        57.2393320 MHz
WDW       EM
SSB       0
LB        15.00 Hz
GB        0
PC        1.40

```

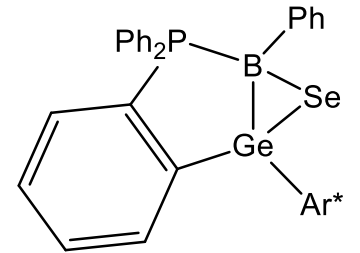

Figure SI35.  $^{77}\text{Se}\{^1\text{H}\}$  NMR spectrum of compound **7**.

NMR spectra of compound **8**.

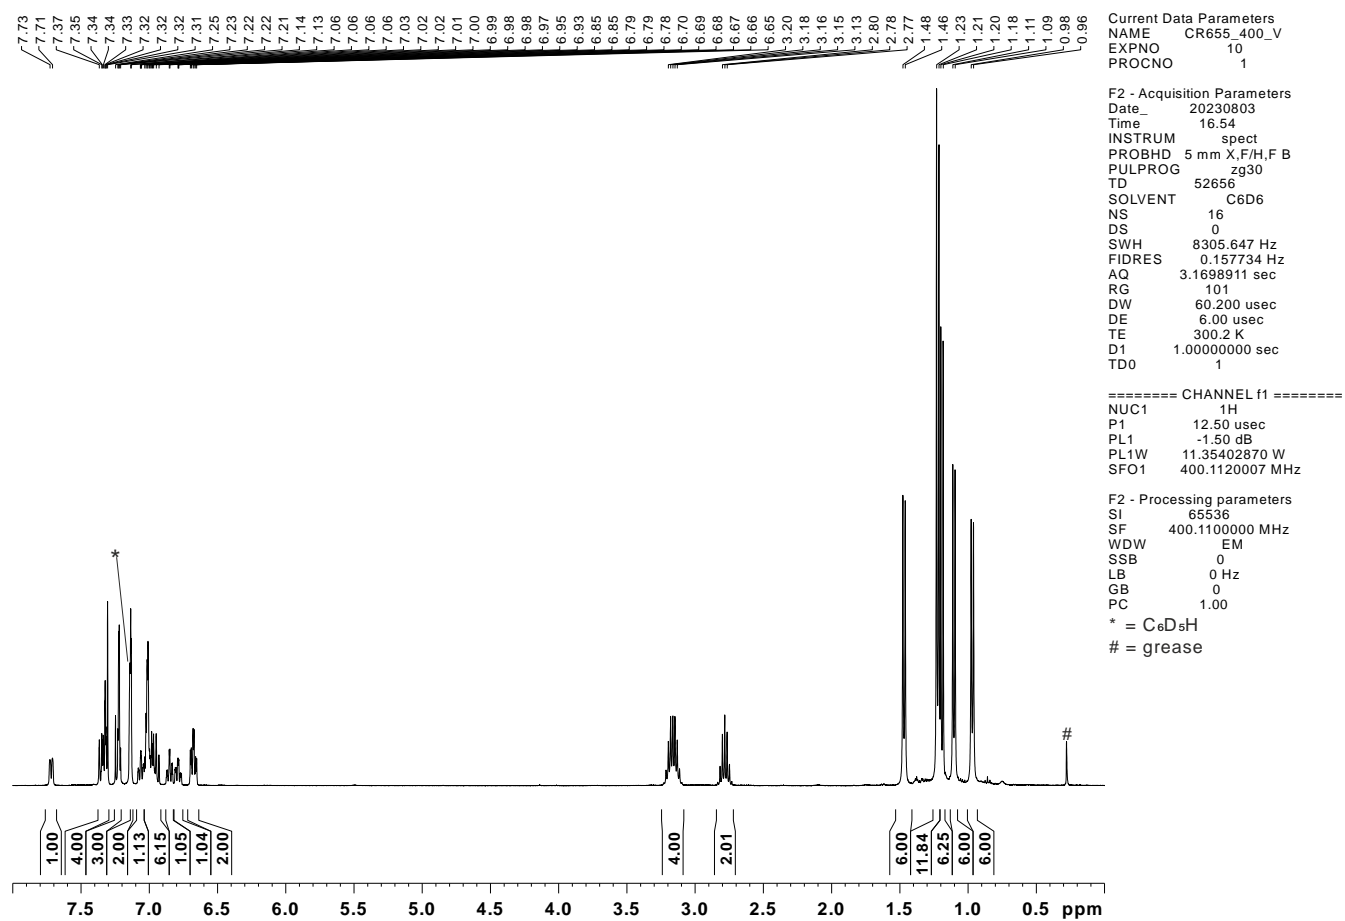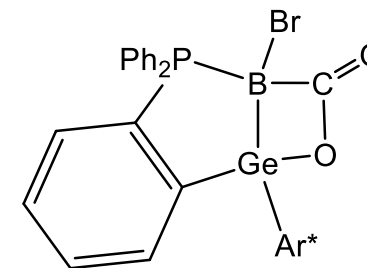

Figure SI36.  $^1\text{H}$  NMR spectrum of compound **8**.

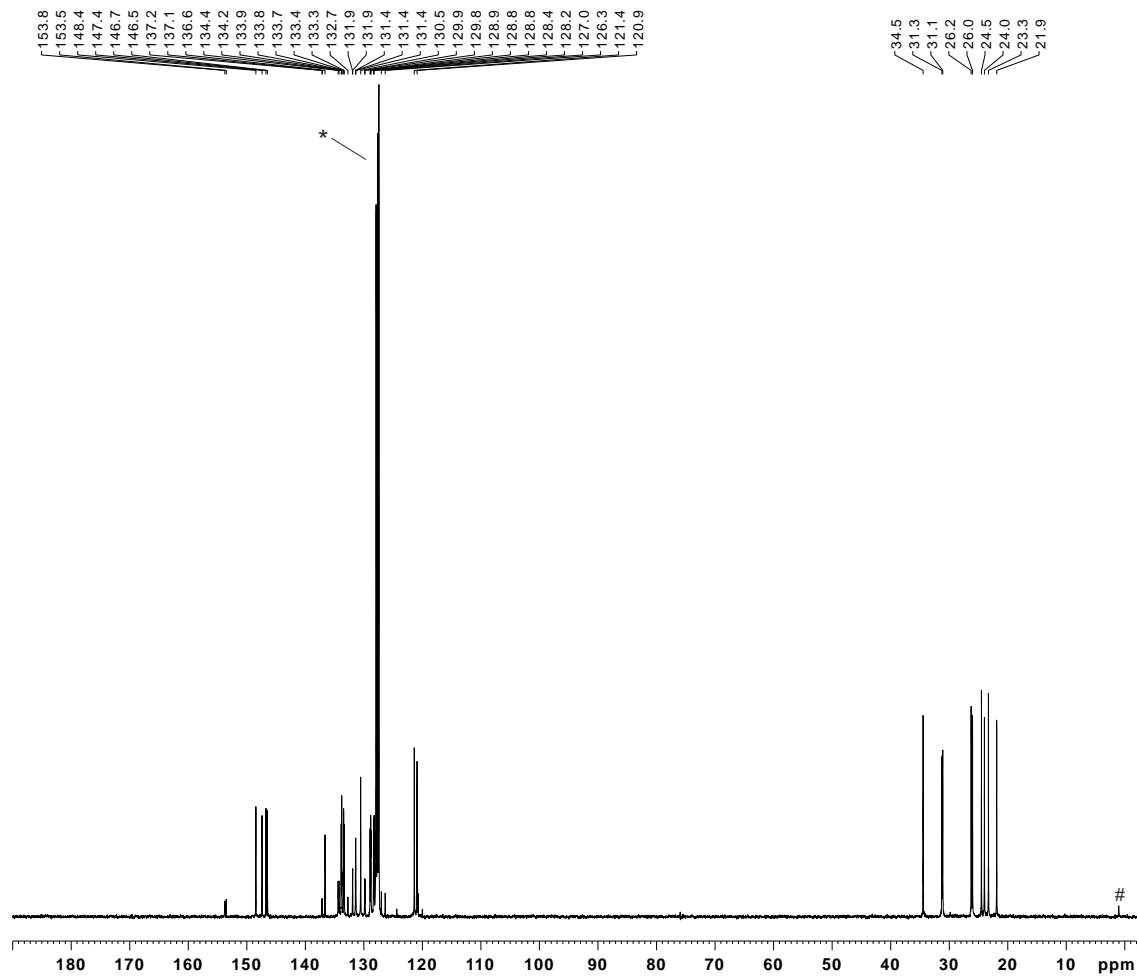

Current Data Parameters  
 NAME CR655\_400\_V  
 EXPNO 12  
 PROCNO 1

F2 - Acquisition Parameters  
 Date\_ 20230804  
 Time 2.01  
 INSTRUM spect  
 PROBHD 5 mm X,F/H,F B  
 PULPROG udef1  
 TD 22218  
 SOLVENT C6D6  
 NS 5700  
 DS 0  
 SWH 30864.197 Hz  
 FIDRES 1.389153 Hz  
 AQ 0.3599316 sec  
 RG 32800  
 DW 16.200 usec  
 DE 6.00 usec  
 TE 300.2 K  
 D1 3.00000000 sec  
 D11 0.03000000 sec  
 D12 0.00002000 sec  
 D20 100.00000000 sec  
 TD0 1

===== CHANNEL f1 =====  
 NUC1 13C  
 P1 14.40 usec  
 P13 2000.00 usec  
 P26 500.00 usec  
 PL1 -5.90 dB  
 PL1W 117.26847076 W  
 SFO1 100.6198135 MHz  
 SP8 -0.91 dB  
 SP13 1.39 dB  
 SPNAM[8] Crp60.0.5.20.1  
 SPNAM[13] Crp60comp.4  
 SPOAL8 0.500  
 SPOAL13 0.500  
 SPOFFS8 0 Hz  
 SPOFFS13 0 Hz

===== CHANNEL f2 =====  
 CPDPRG[2] waltz16  
 NUC2 1H  
 PCPD2 90.00 usec  
 PL2 -1.50 dB  
 PL12 15.65 dB  
 PL2W 11.35402870 W  
 PL12W 0.21885175 W  
 SFO2 400.1120007 MHz

F2 - Processing parameters  
 SI 131072  
 SF 100.6077400 MHz  
 WDW EM  
 SSB 0  
 LB 2.00 Hz  
 GB 0  
 PC 1.40

# = grease  
 \* = C<sub>6</sub>D<sub>6</sub>

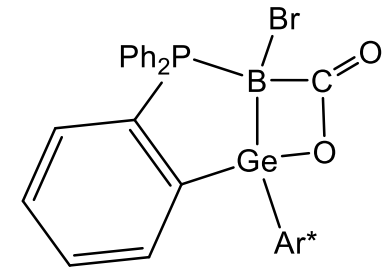

Figure SI37. <sup>13</sup>C{<sup>1</sup>H} NMR spectrum of compound **8**.

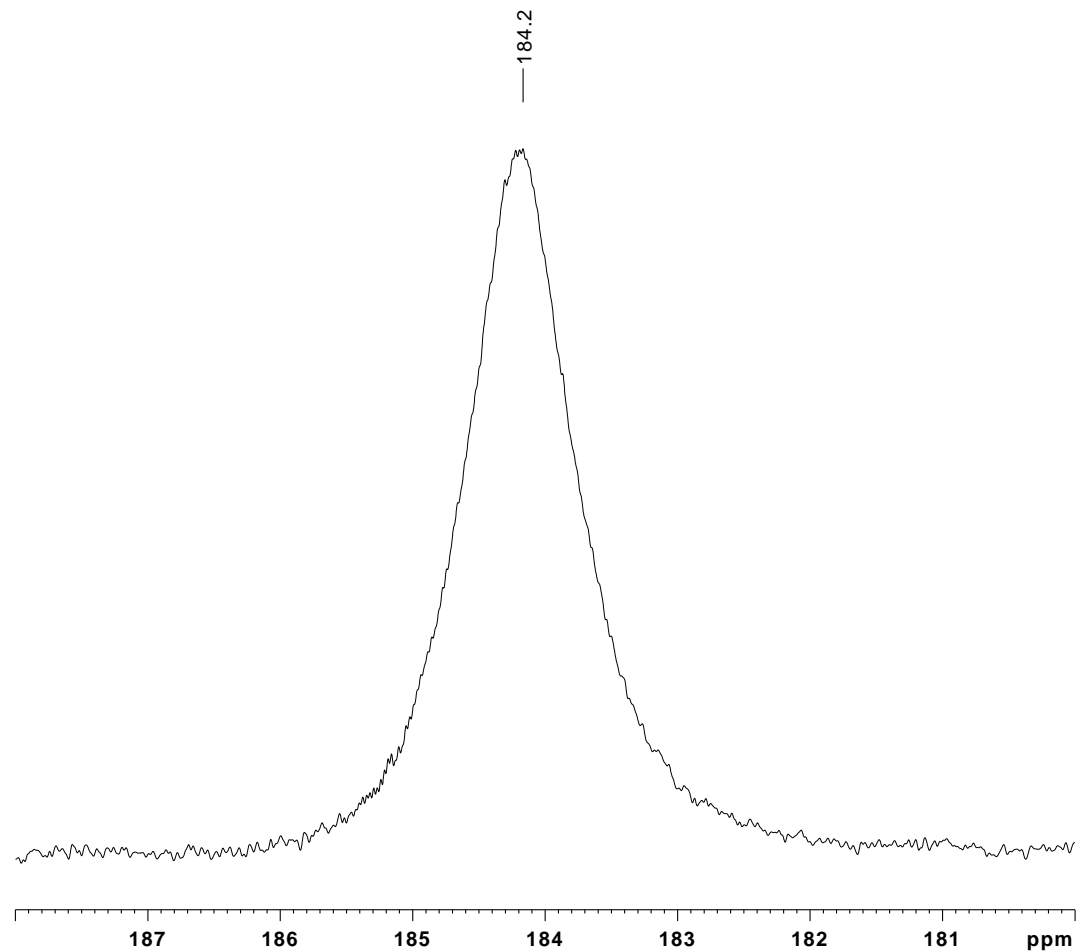

Current Data Parameters  
 NAME CR699\_400\_2  
 EXPNO 24  
 PROCNO 1

F2 - Acquisition Parameters  
 Date\_ 20240313  
 Time 7.19  
 INSTRUM spect  
 PROBHD 5 mm X,F/H,F B  
 PULPROG udeflt  
 TD 22218  
 SOLVENT C6D6  
 NS 5400  
 DS 0  
 SWH 30864.197 Hz  
 FIDRES 1.389153 Hz  
 AQ 0.3599316 sec  
 RG 32800  
 DW 16.200 usec  
 DE 6.00 usec  
 TE 299.2 K  
 D1 3.00000000 sec  
 D11 0.03000000 sec  
 D12 0.00002000 sec  
 D20 100.00000000 sec  
 TD0 1

===== CHANNEL f1 =====  
 NUC1 13C  
 P1 14.40 usec  
 P13 2000.00 usec  
 P26 500.00 usec  
 PL1 -5.90 dB  
 PL1W 117.26847076 W  
 SFO1 100.6198135 MHz  
 SP8 -0.91 dB  
 SP13 1.39 dB  
 SPNAM[8] Crp60.0.5.20.1  
 SPNAM[13] Crp60comp.4  
 SPOAL8 0.500  
 SPOAL13 0.500  
 SPOFFS8 0 Hz  
 SPOFFS13 0 Hz

===== CHANNEL f2 =====  
 CPDPRG[2] waltz16  
 NUC2 1H  
 PCPD2 90.00 usec  
 PL2 -1.50 dB  
 PL12 15.65 dB  
 PL2W 11.35402870 W  
 PL12W 0.21885175 W  
 SFO2 400.1120007 MHz

F2 - Processing parameters  
 SI 131072  
 SF 100.6077400 MHz  
 WDW EM  
 SSB 0  
 LB 2.00 Hz  
 GB 0  
 PC 1.40

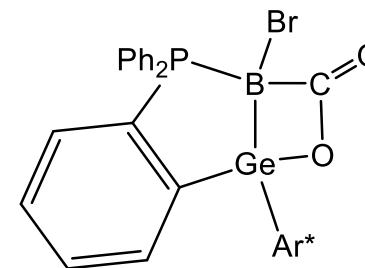

Figure SI38.  $^{13}\text{C}\{^1\text{H}\}$  NMR spectrum of compound **8** synthesized with (99.0 %)  $^{13}\text{CO}_2$ .

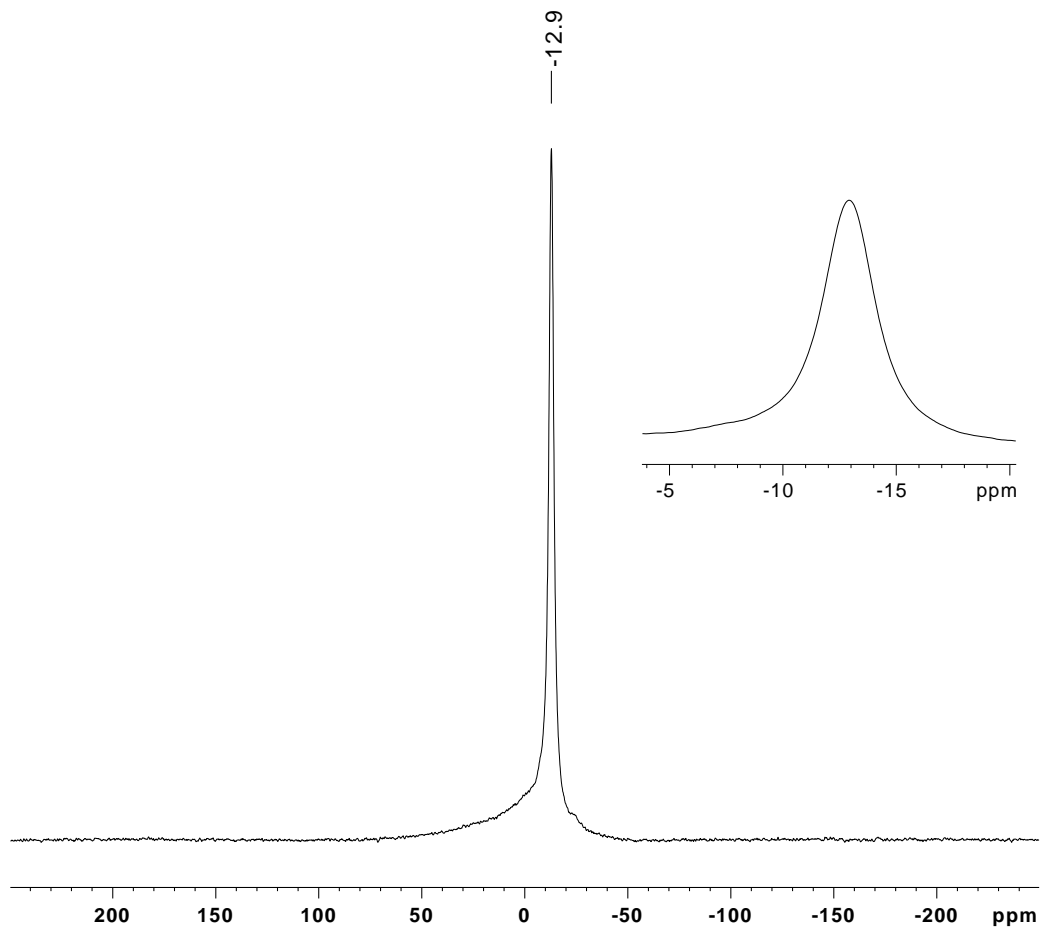

Current Data Parameters  
 NAME CR445\_400  
 EXPNO 11  
 PROCNO 1  
 F2 - Acquisition Parameters  
 Date\_ 20220609  
 Time 16.47  
 INSTRUM spect  
 PROBHD 5 mm X,F/H,F B  
 PULPROG zgbsig  
 TD 8192  
 SOLVENT C6D6  
 NS 1024  
 DS 0  
 SWH 64102.562 Hz  
 FIDRES 7.825020 Hz  
 AQ 0.0638976 sec  
 RG 2050  
 DW 7.800 usec  
 DE 6.00 usec  
 TE 299.2 K  
 D1 0.10000000 sec  
 D11 0.03000000 sec  
 TD0 1

==== CHANNEL f1 =====  
 NUC1 11B  
 P1 15.00 usec  
 P2 30.00 usec  
 PL1 -3.00 dB  
 SFO1 128.3711884 MHz

==== CHANNEL f2 =====  
 CPDPRG[2] garp  
 NUC2 1H  
 PCPD2 90.00 usec  
 PL2 -1.50 dB  
 PL12 15.65 dB  
 PL2W 11.35402870 W  
 PL12W 0.21885175 W  
 SFO2 400.1108002 MHz

F2 - Processing parameters  
 SI 8192  
 SF 128.3711880 MHz  
 WDW EM  
 SSB 0  
 LB 50.00 Hz  
 GB 0  
 PC 1.40

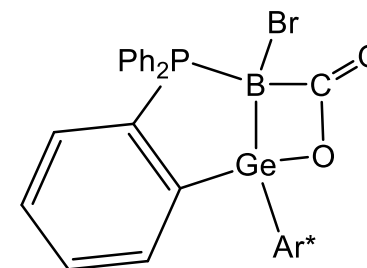

Figure SI39.  $^{11}\text{B}\{^1\text{H}\}$  NMR spectrum of compound 8.

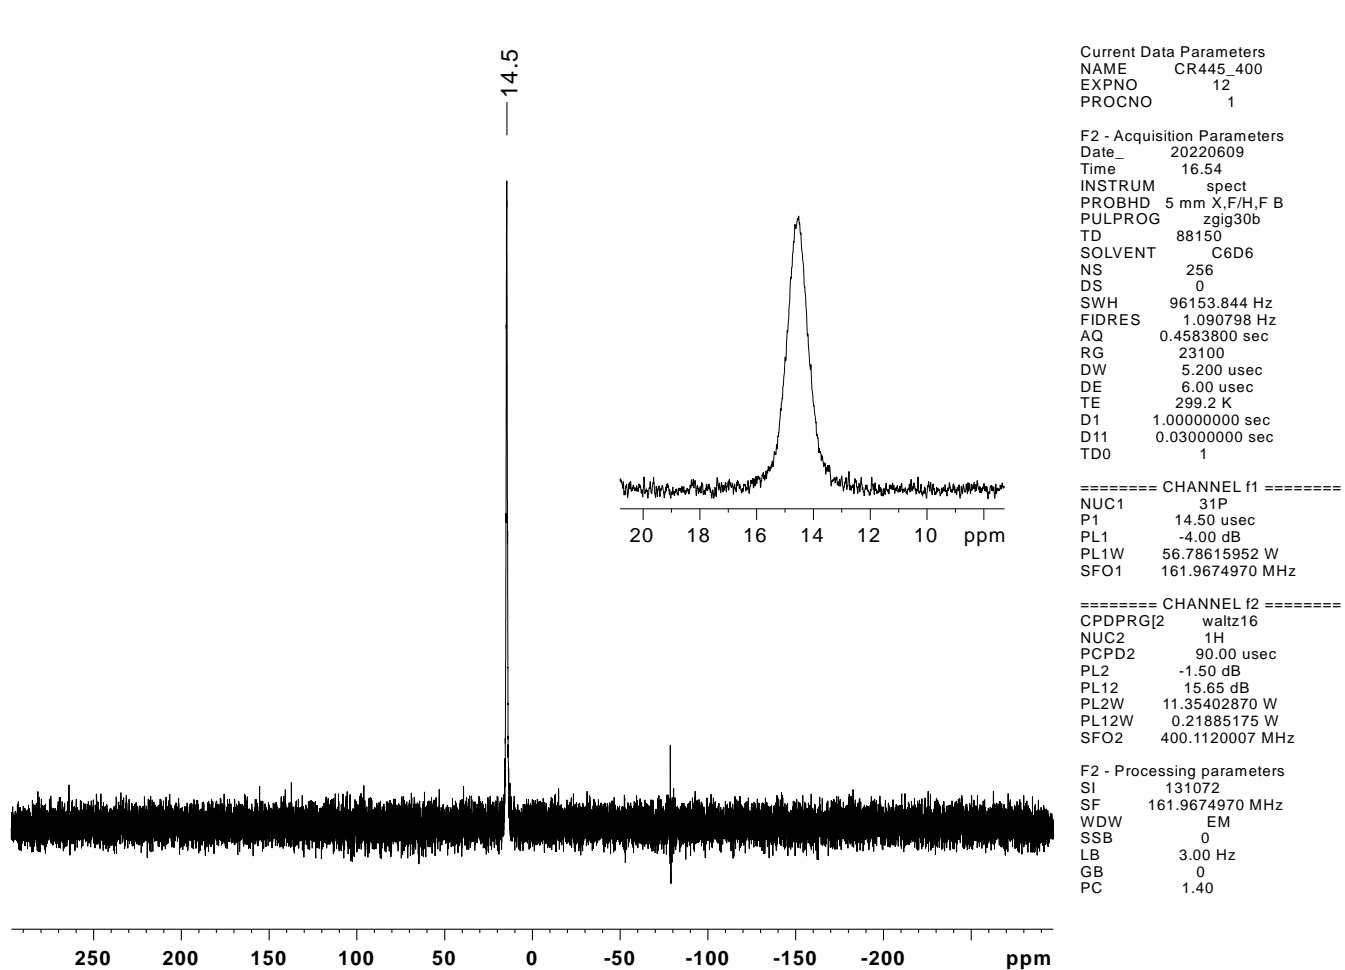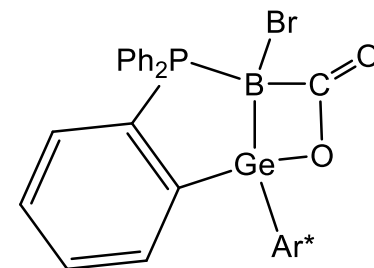Figure SI40.  $^{31}\text{P}\{^1\text{H}\}$  NMR spectrum of compound **8**.

NMR spectra of compound **9**.

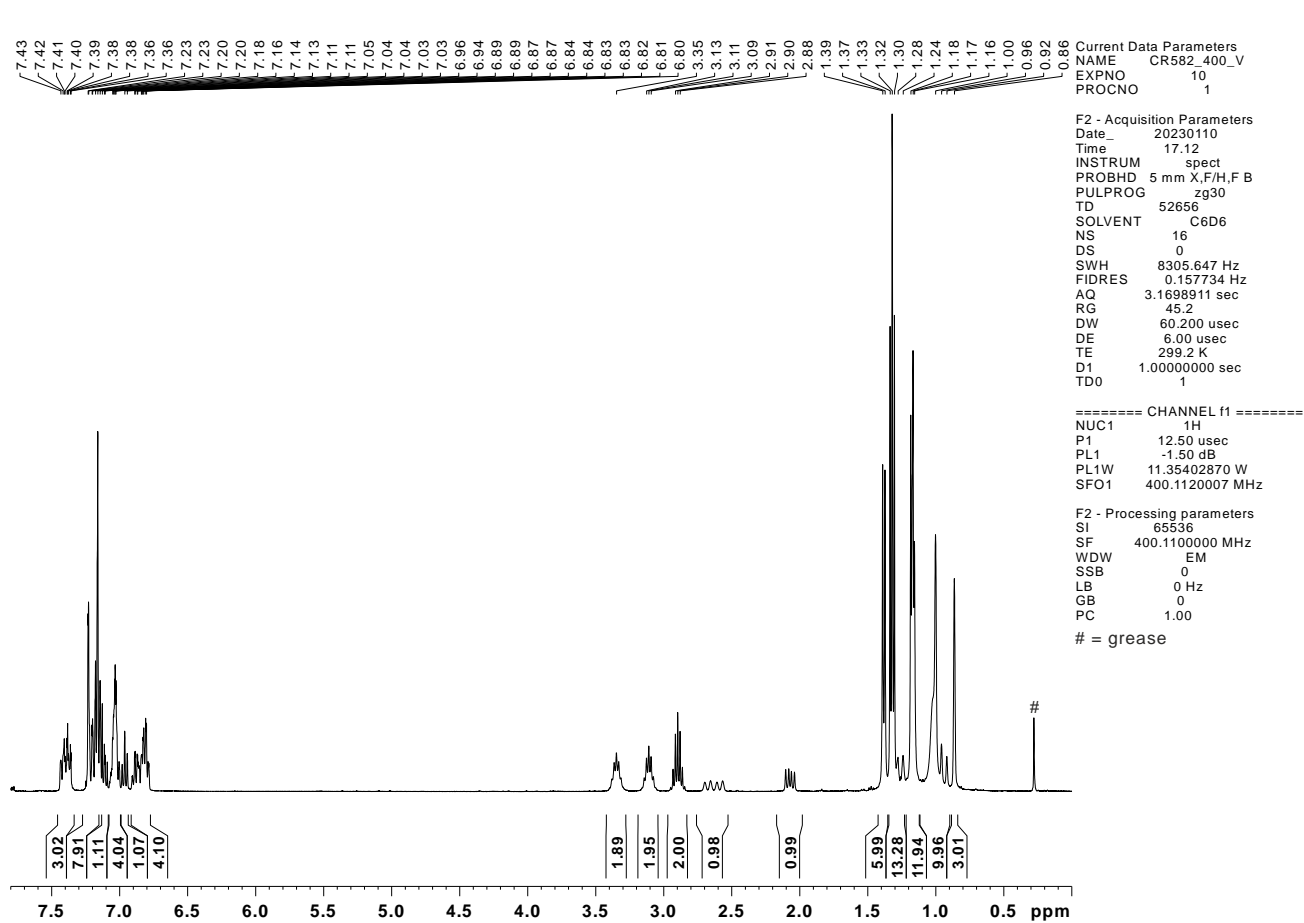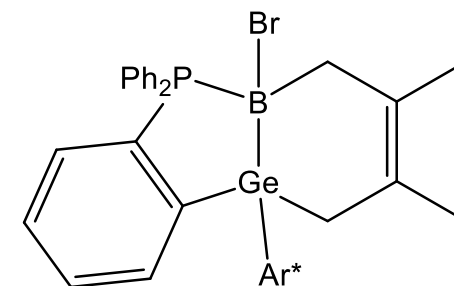

Figure SI41.  $^1\text{H}$  NMR spectrum of compound **9**.

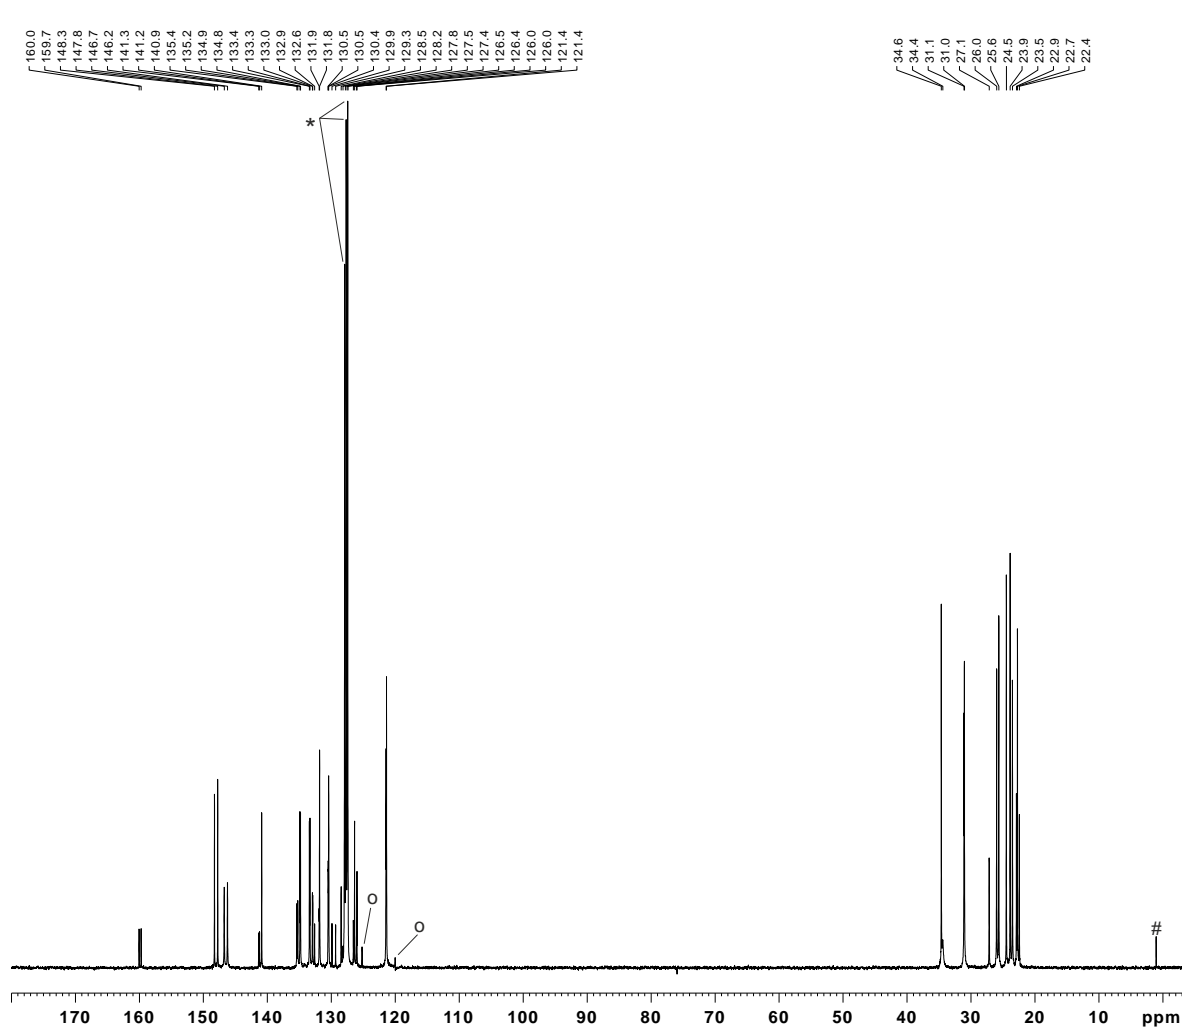

Current Data Parameters  
 NAME CR582\_400\_V  
 EXPNO 13  
 PROCNO 1

F2 - Acquisition Parameters  
 Date\_ 20230111  
 Time 1.57  
 INSTRUM spect  
 PROBHD 5 mm X,F/H,F B  
 PULPROG udef1  
 TD 22218  
 SOLVENT C6D6  
 NS 5700  
 DS 0  
 SWH 30864.197 Hz  
 FIDRES 1.389153 Hz  
 AQ 0.3599316 sec  
 RG 32800  
 DW 16.200 usec  
 DE 6.00 usec  
 TE 299.2 K  
 D1 3.00000000 sec  
 D11 0.03000000 sec  
 D12 0.00002000 sec  
 D20 100.00000000 sec  
 TD0 1

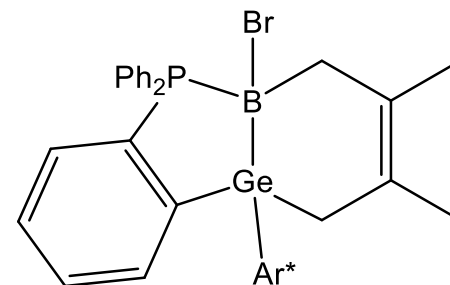

===== CHANNEL f1 =====  
 NUC1 13C  
 P1 14.40 usec  
 P13 2000.00 usec  
 P26 500.00 usec  
 PL1 -5.90 dB  
 PL1W 117.26847076 W  
 SFO1 100.6198135 MHz  
 SP8 -0.91 dB  
 SP13 1.39 dB  
 SPNAM[8] Crp60,0.5,20.1  
 SPNAM[13] Crp60comp.4  
 SPOAL8 0.500  
 SPOAL13 0.500  
 SPOFFS8 0 Hz  
 SPOFFS13 0 Hz

===== CHANNEL f2 =====  
 CPDPRG[2] waltz16  
 NUC2 1H  
 PCPD2 90.00 usec  
 PL2 -1.50 dB  
 PL12 15.65 dB  
 PL2W 11.35402870 W  
 PL12W 0.21885175 W  
 SFO2 400.1120007 MHz

F2 - Processing parameters  
 SI 131072  
 SF 100.6077400 MHz  
 WDW EM  
 SSB 0  
 LB 2.00 Hz  
 GB 0  
 PC 1.40

# = grease  
 o = trace impurities  
 \* = C<sub>6</sub>D<sub>6</sub>

Figure SI42. <sup>13</sup>C{<sup>1</sup>H} NMR spectrum of compound 9.



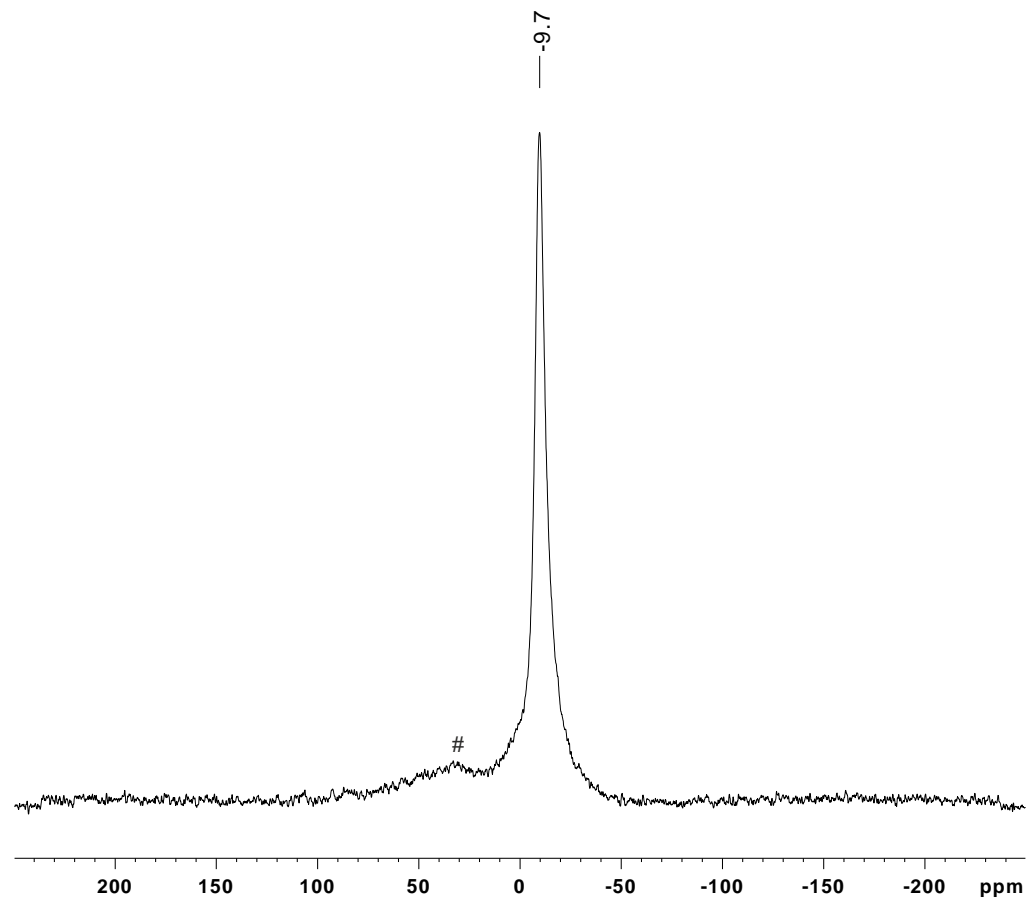

Current Data Parameters  
 NAME CR582\_400  
 EXPNO 11  
 PROCNO 1

F2 - Acquisition Parameters  
 Date\_ 20230109  
 Time 14.31  
 INSTRUM spect  
 PROBHD 5 mm X,F/H,F B  
 PULPROG zgbsig  
 TD 8192  
 SOLVENT C6D6  
 NS 1024  
 DS 0  
 SWH 64102.562 Hz  
 FIDRES 7.825020 Hz  
 AQ 0.0638976 sec  
 RG 2050  
 DW 7.800 usec  
 DE 6.00 usec  
 TE 299.2 K  
 D1 0.1000000 sec  
 D11 0.0300000 sec  
 TD0 1

===== CHANNEL f1 =====  
 NUC1 11B  
 P1 15.00 usec  
 P2 30.00 usec  
 PL1 -3.00 dB  
 SFO1 128.3711884 MHz

===== CHANNEL f2 =====  
 CPDPRG[2] garp  
 NUC2 1H  
 PCPD2 90.00 usec  
 PL2 -1.50 dB  
 PL12 15.65 dB  
 PL2W 11.35402870 W  
 PL12W 0.21885175 W  
 SFO2 400.1108002 MHz

F2 - Processing parameters  
 SI 8192  
 SF 128.3711880 MHz  
 WDW EM  
 SSB 0  
 LB 50.00 Hz  
 GB 0  
 PC 1.40

# = glass background signal

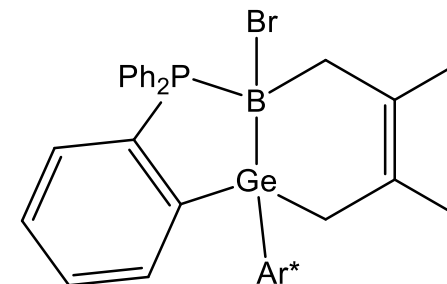

Figure SI43.  $^{11}\text{B}\{^1\text{H}\}$  NMR spectrum of compound **9**.

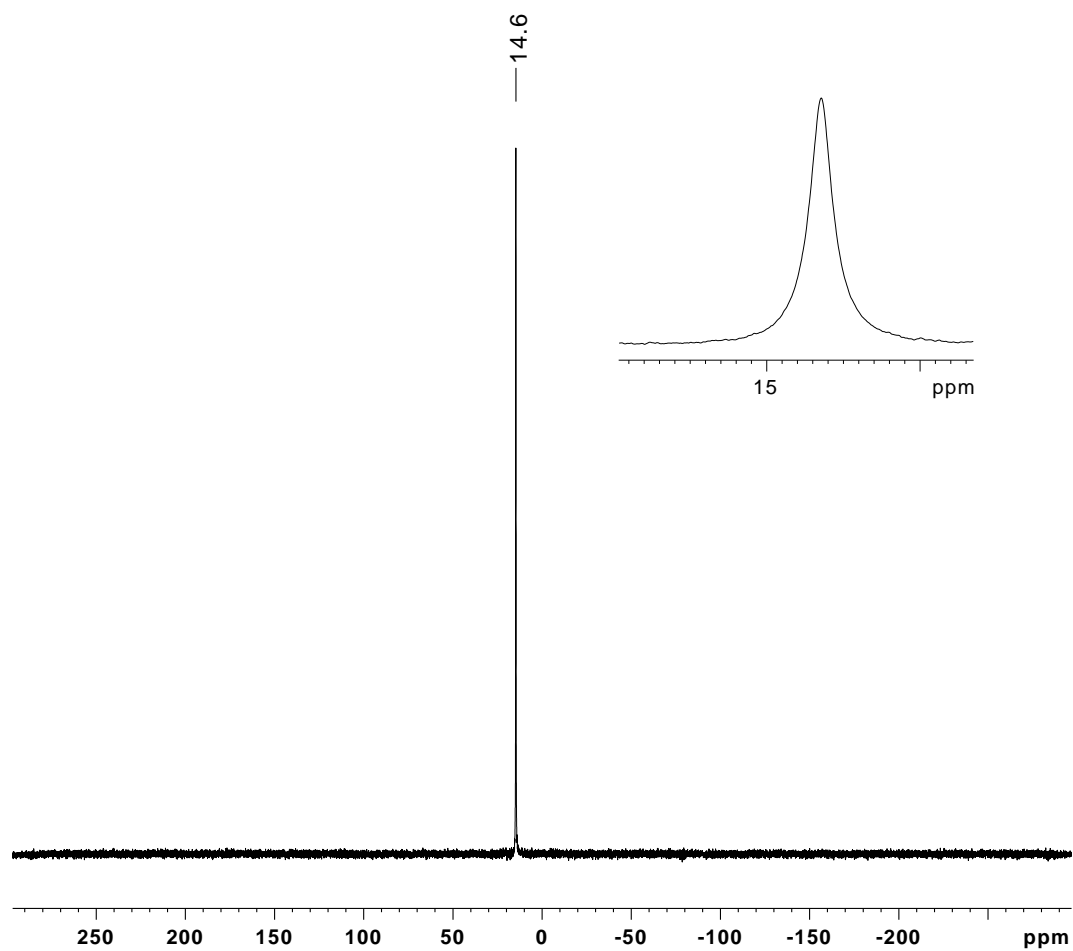

Current Data Parameters  
 NAME CR582\_400  
 EXPNO 12  
 PROCNO 1

F2 - Acquisition Parameters  
 Date\_ 20230109  
 Time 14.38  
 INSTRUM spect  
 PROBHD 5 mm X,F/H,F B  
 PULPROG zgig30b  
 TD 88150  
 SOLVENT C6D6  
 NS 256  
 DS 0  
 SWH 96153.844 Hz  
 FIDRES 1.090798 Hz  
 AQ 0.4583800 sec  
 RG 23100  
 DW 5.200 usec  
 DE 6.00 usec  
 TE 299.2 K  
 D1 1.00000000 sec  
 D11 0.03000000 sec  
 TD0 1

===== CHANNEL f1 =====  
 NUC1 31P  
 P1 14.50 usec  
 PL1 -4.00 dB  
 PL1W 56.78615952 W  
 SFO1 161.9674970 MHz

===== CHANNEL f2 =====  
 CPDPRG[2] waltz16  
 NUC2 1H  
 PCPD2 90.00 usec  
 PL2 -1.50 dB  
 PL12 15.65 dB  
 PL2W 11.35402870 W  
 PL12W 0.21885175 W  
 SFO2 400.1120007 MHz

F2 - Processing parameters  
 SI 131072  
 SF 161.9674970 MHz  
 WDW EM  
 SSB 0  
 LB 3.00 Hz  
 GB 0  
 PC 1.40

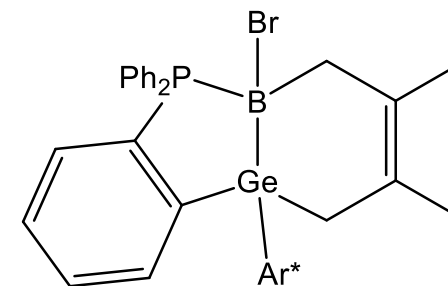

Figure SI44.  $^{31}\text{P}\{^1\text{H}\}$  NMR spectrum of compound 9.

NMR spectra of compound **10**.

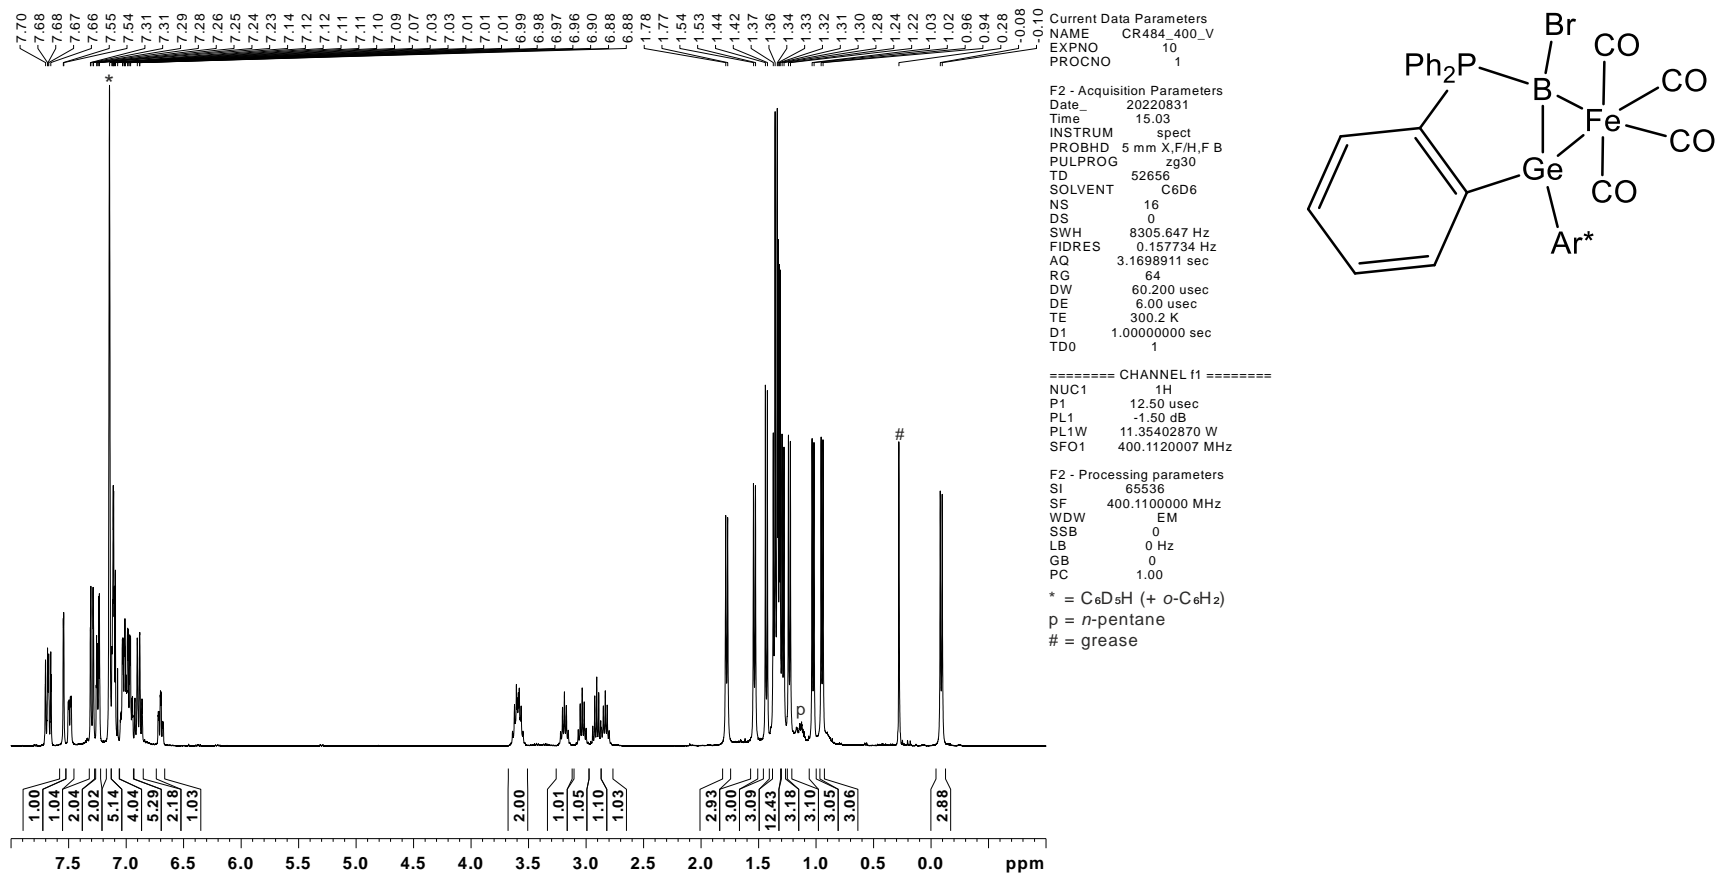

Figure SI45. <sup>1</sup>H NMR spectrum of compound **10**.

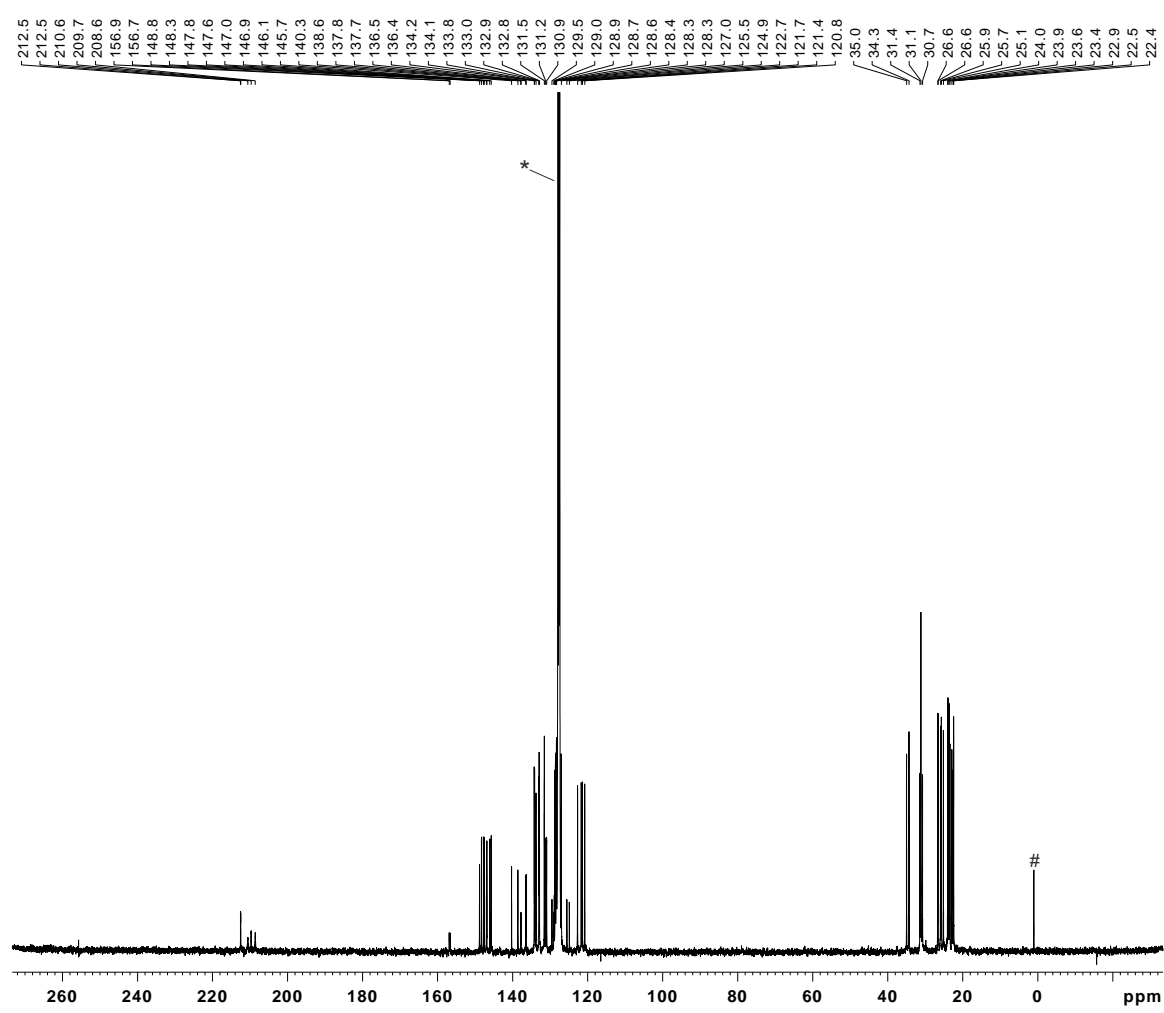

Current Data Parameters  
 NAME CR484\_400\_V\_2  
 EXPNO 25  
 PROCNO 1

F2 - Acquisition Parameters  
 Date\_ 20220901  
 Time\_ 7.26  
 INSTRUM spect  
 PROBHD 5 mm X,F/H,F B  
 PULPROG udeflt  
 TD 22218  
 SOLVENT C6D6  
 NS 5400  
 DS 0  
 SWH 30864.197 Hz  
 FIDRES 1.389153 Hz  
 AQ 0.3599316 sec  
 RG 32800  
 DW 16.200 usec  
 DE 6.00 usec  
 TE 299.2 K  
 D1 3.00000000 sec  
 D11 0.03000000 sec  
 D12 0.00002000 sec  
 D20 100.00000000 sec  
 TD0 1

===== CHANNEL f1 =====  
 NUC1 13C  
 P1 14.40 usec  
 P13 2000.00 usec  
 P26 500.00 usec  
 PL1 -5.90 dB  
 PL1W 117.28847076 W  
 SFO1 100.6198135 MHz  
 SP8 -0.91 dB  
 SP13 1.39 dB  
 SPNAM[8] Crp60,0.5,20.1  
 SPNAM[13] Crp60comp.4  
 SPOAL8 0.500  
 SPOAL13 0.500  
 SPOFFS8 0 Hz  
 SPOFFS13 0 Hz

===== CHANNEL f2 =====  
 CPDPRG[2] waltz16  
 NUC2 1H  
 PCPD2 90.00 usec  
 PL2 -1.50 dB  
 PL12 15.65 dB  
 PL2W 11.35402870 W  
 PL12W 0.21885175 W  
 SFO2 400.1120007 MHz

F2 - Processing parameters  
 SI 131072  
 SF 100.6077400 MHz  
 WDW EM  
 SSB 0  
 LB 2.00 Hz  
 GB 0  
 PC 1.40

# = grease  
 \* = C<sub>6</sub>D<sub>6</sub>

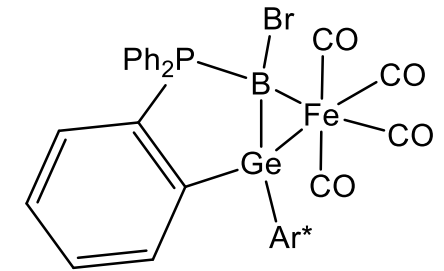

Figure SI46. <sup>13</sup>C{<sup>1</sup>H} NMR spectrum of compound 10.

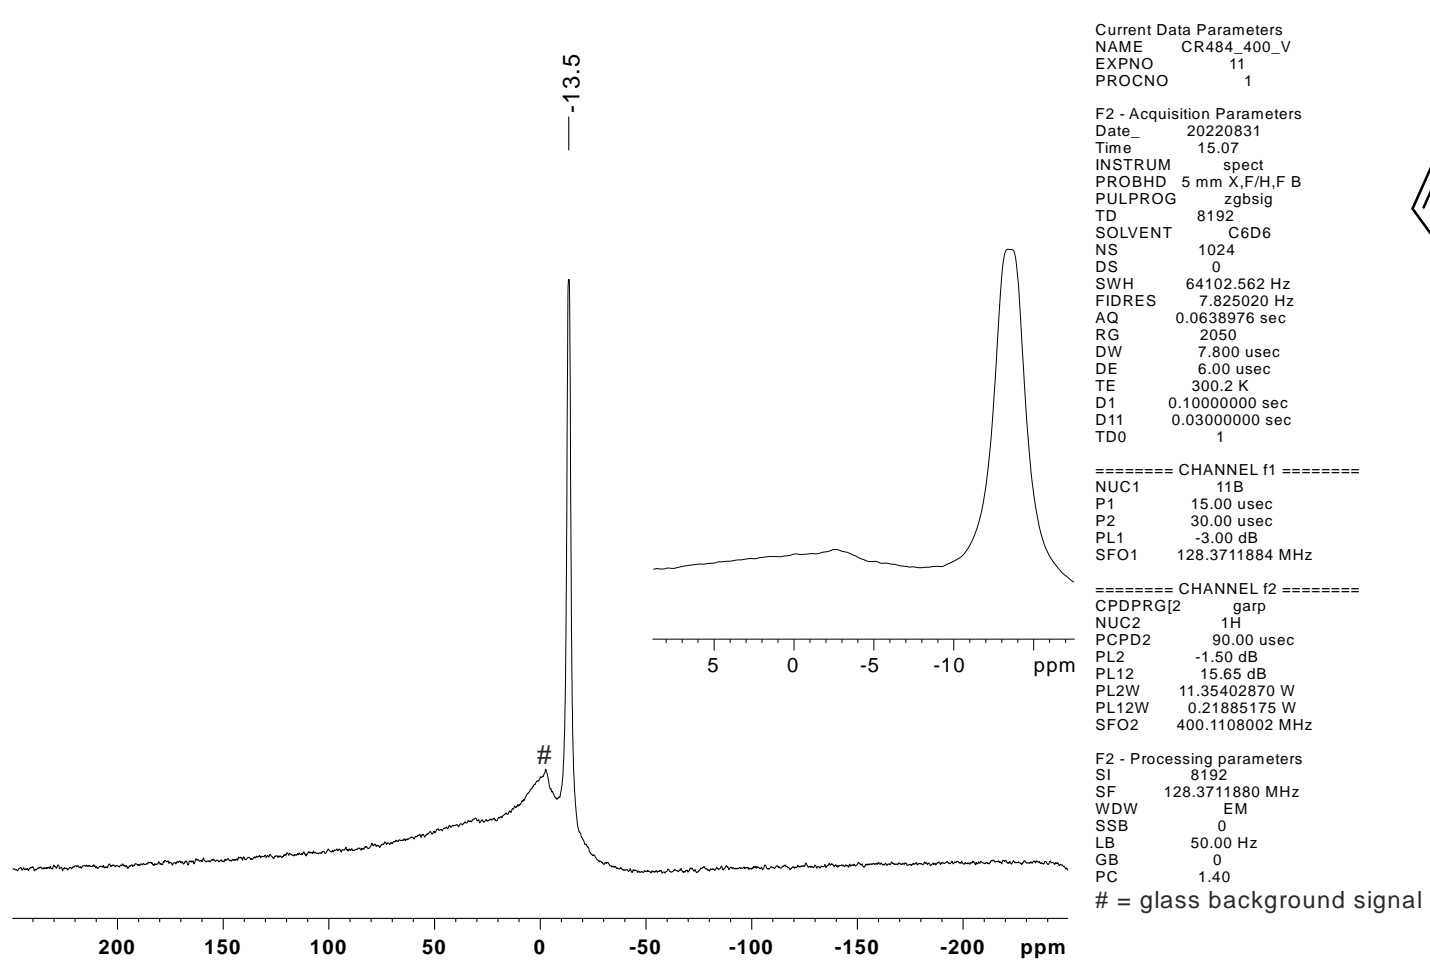Figure SI47.  $^{11}\text{B}\{^1\text{H}\}$  NMR spectrum of compound 10.

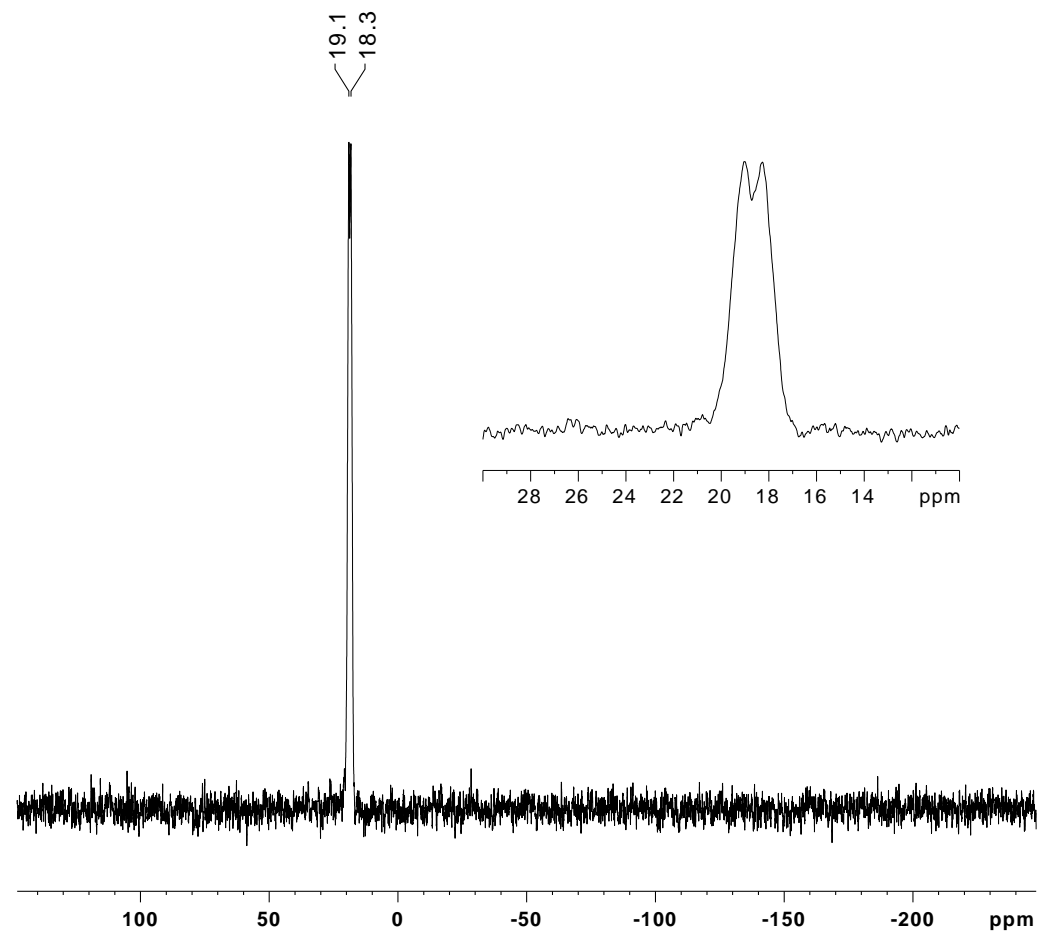

Current Data Parameters  
 NAME CR484\_400\_V  
 EXPNO 12  
 PROCNO 1

F2 - Acquisition Parameters  
 Date\_ 20220831  
 Time 15.14  
 INSTRUM spect  
 PROBHD 5 mm X,F/H,F B  
 PULPROG zgig30b  
 TD 88150  
 SOLVENT C6D6  
 NS 256  
 DS 0  
 SWH 96153.844 Hz  
 FIDRES 1.090798 Hz  
 AQ 0.4583800 sec  
 RG 23100  
 DW 5.200 usec  
 DE 6.00 usec  
 TE 300.2 K  
 D1 1.00000000 sec  
 D11 0.03000000 sec  
 TD0 1

===== CHANNEL f1 =====  
 NUC1 31P  
 P1 14.50 usec  
 PL1 -4.00 dB  
 PL1W 56.78615952 W  
 SFO1 161.9674970 MHz

===== CHANNEL f2 =====  
 CPDPRG2 waltz16  
 NUC2 1H  
 PCPD2 90.00 usec  
 PL2 -1.50 dB  
 PL12 15.65 dB  
 PL2W 11.35402870 W  
 PL12W 0.21885175 W  
 SFO2 400.1120007 MHz

F2 - Processing parameters  
 SI 131072  
 SF 161.9674970 MHz  
 WDW EM  
 SSB 0  
 LB 15.00 Hz  
 GB 0  
 PC 1.40

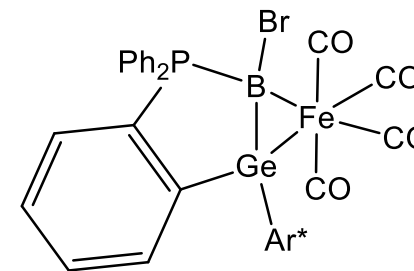

Figure SI48.  $^{31}\text{P}\{^1\text{H}\}$  NMR spectrum of compound **10**.

NMR spectra of compound **11**.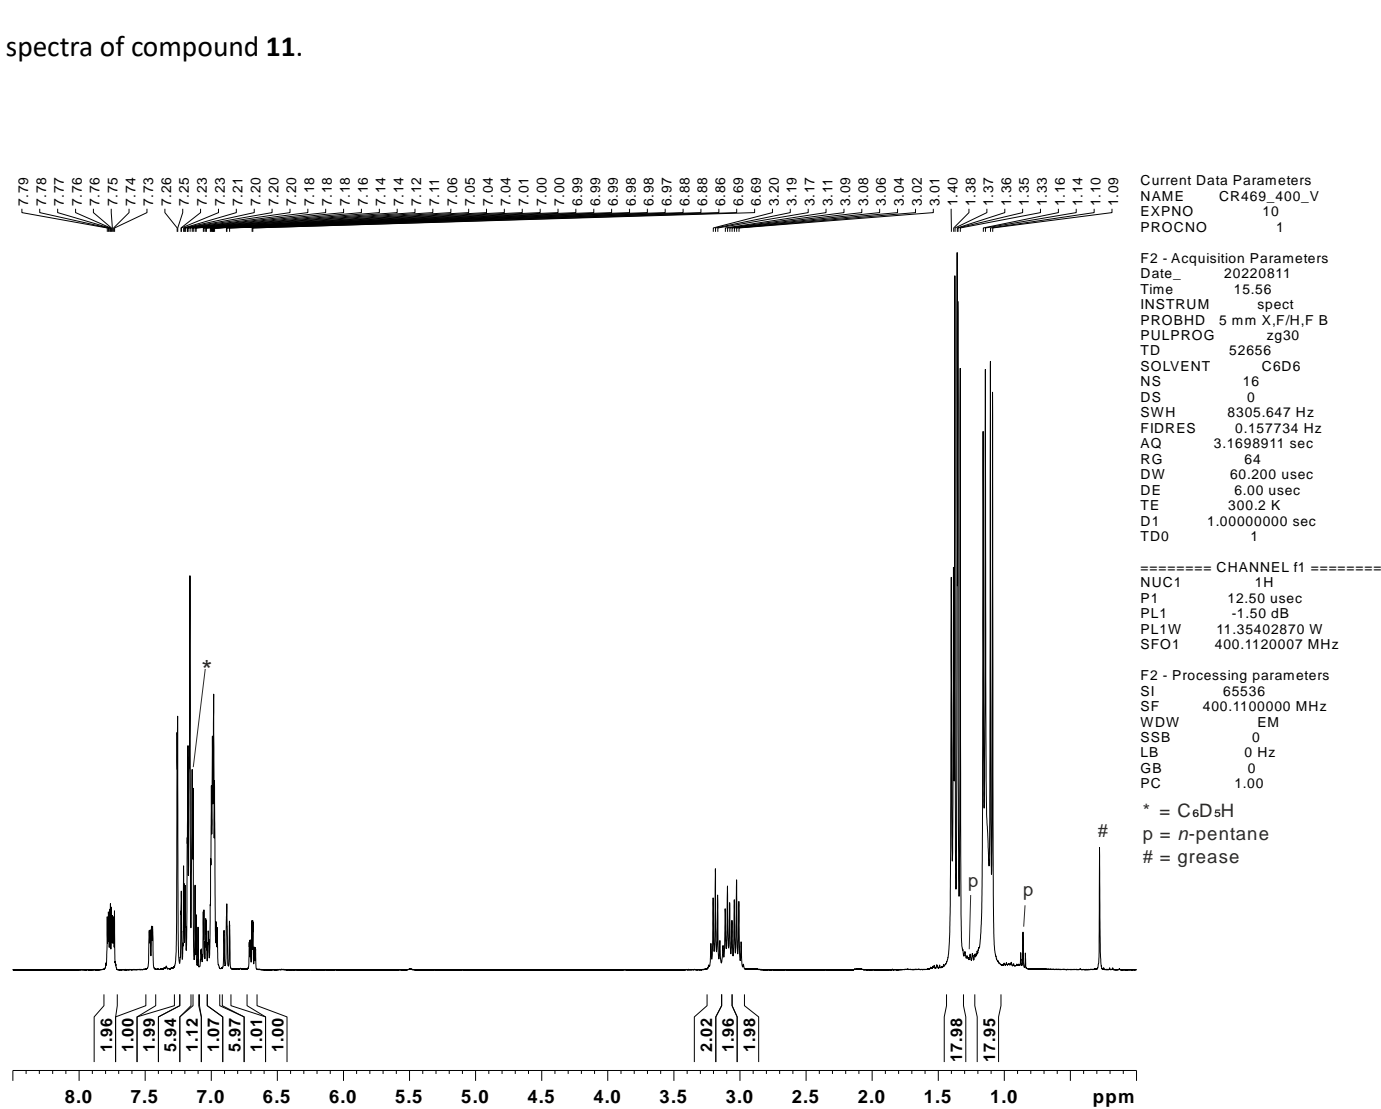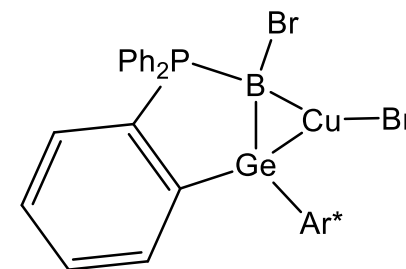Figure SI49. <sup>1</sup>H NMR spectrum of compound **11**.

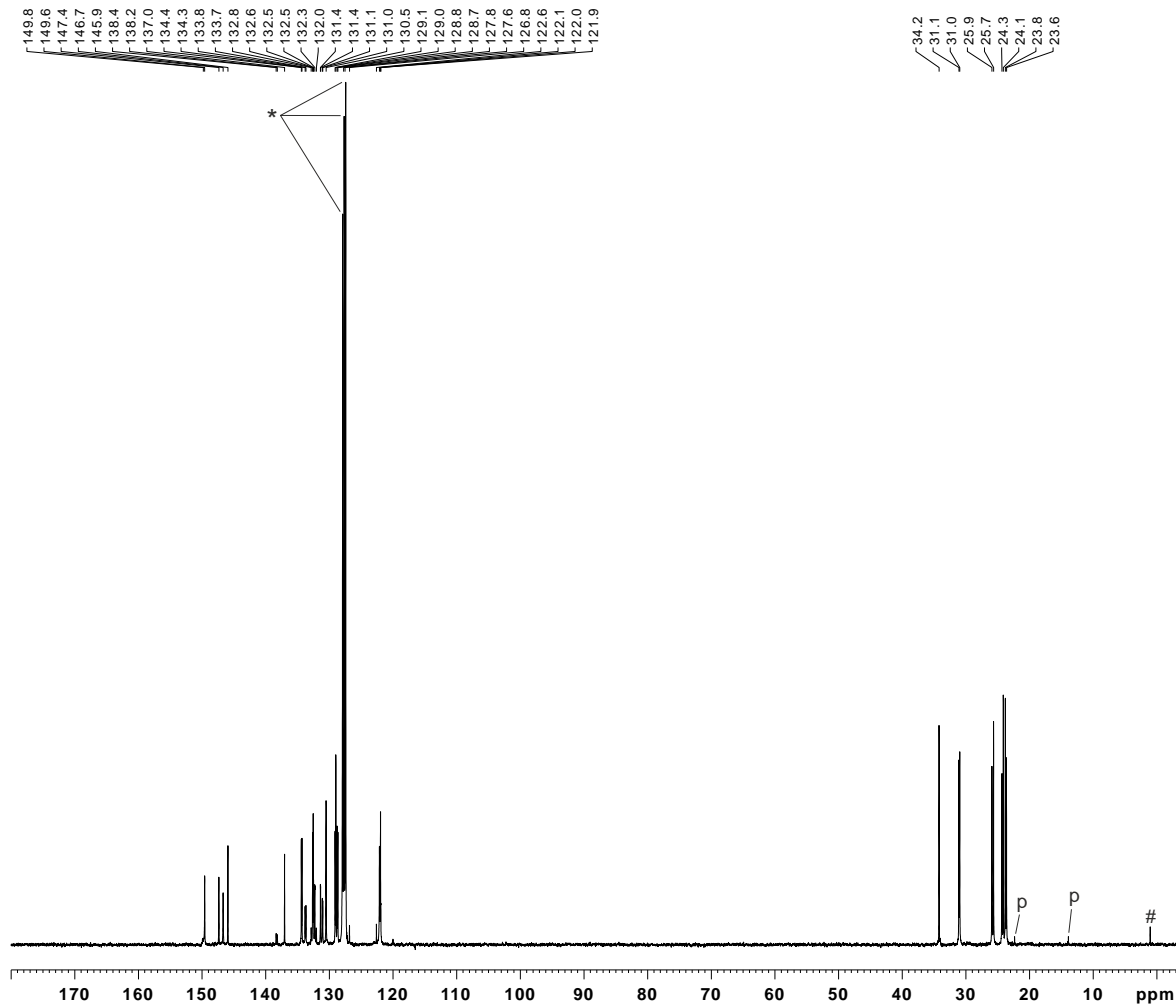

Current Data Parameters  
 NAME CR469\_400\_V  
 EXPNO 14  
 PROCNO 1

F2 - Acquisition Parameters  
 Date\_ 20220812  
 Time 1.59  
 INSTRUM spect  
 PROBHD 5 mm X,F/H,F,B  
 PULPROG udef  
 TD 22218  
 SOLVENT C6D6  
 NS 5700  
 DS 0  
 SWH 30864.197 Hz  
 FIDRES 1.389153 Hz  
 AQ 0.3599316 sec  
 RG 32800  
 DW 16.200 usec  
 DE 6.00 usec  
 TE 300.2 K  
 D1 3.00000000 sec  
 D11 0.03000000 sec  
 D12 0.00002000 sec  
 D20 100.00000000 sec  
 TD0 1

===== CHANNEL f1 =====  
 NUC1 13C  
 P1 14.40 usec  
 P13 2000.00 usec  
 P26 500.00 usec  
 PL1 -5.90 dB  
 PL1W 117.26847076 W  
 SFO1 100.6198135 MHz  
 SP8 -0.91 dB  
 SP13 1.39 dB  
 SPNAM[8] Crp60,0.5,20.1  
 SPNAM[13] Crp60comp.4  
 SPOAL8 0.500  
 SPOAL13 0.500  
 SPOFFS8 0 Hz  
 SPOFFS13 0 Hz

===== CHANNEL f2 =====  
 CPDPRG[2] waltz16  
 NUC2 1H  
 PCPD2 90.00 usec  
 PL2 -1.50 dB  
 PL12 15.65 dB  
 PL2W 11.35402870 W  
 PL12W 0.21885175 W  
 SFO2 400.1120007 MHz

F2 - Processing parameters  
 SI 131072  
 SF 100.6077400 MHz  
 WDW EM  
 SSB 0  
 LB 2.00 Hz  
 GB 0  
 PC 1.40

p = *n*-pentane  
 # = grease  
 \* = C<sub>6</sub>D<sub>6</sub>

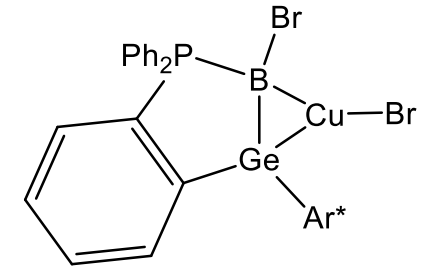

Figure SI50. <sup>13</sup>C{<sup>1</sup>H} NMR spectrum of compound 11.



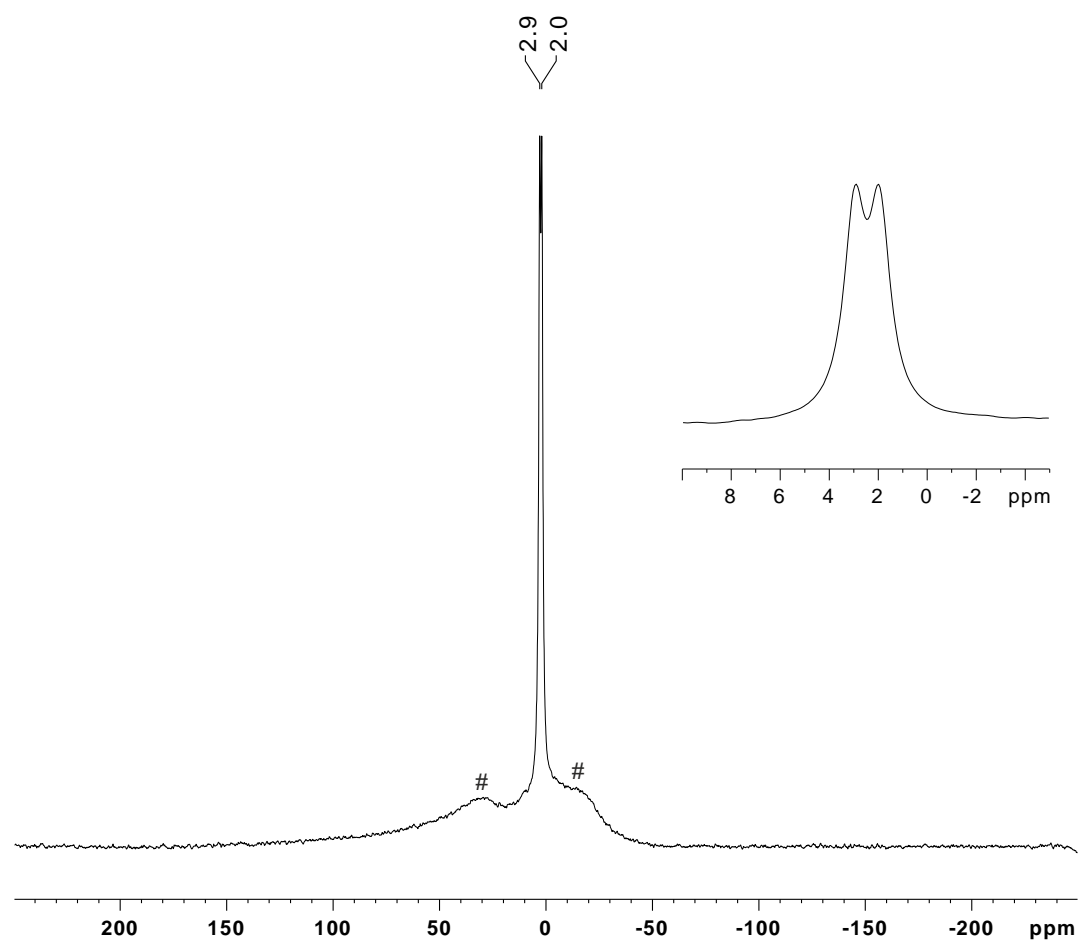

Current Data Parameters  
 NAME CR469\_400\_V  
 EXPNO 11  
 PROCNO 1

F2 - Acquisition Parameters  
 Date\_ 20220811  
 Time 16.00  
 INSTRUM spect  
 PROBHD 5 mm X,F/H,F B  
 PULPROG zgbsig  
 TD 8192  
 SOLVENT C6D6  
 NS 1024  
 DS 0  
 SWH 64102.562 Hz  
 FIDRES 7.825020 Hz  
 AQ 0.0638976 sec  
 RG 2050  
 DW 7.800 usec  
 DE 6.00 usec  
 TE 300.2 K  
 D1 0.10000000 sec  
 D11 0.03000000 sec  
 TD0 1

===== CHANNEL f1 =====  
 NUC1 11B  
 P1 15.00 usec  
 P2 30.00 usec  
 PL1 -3.00 dB  
 SFO1 128.3711884 MHz

===== CHANNEL f2 =====  
 CPDPRG[2] garp  
 NUC2 1H  
 PCPD2 90.00 usec  
 PL2 -1.50 dB  
 PL12 15.65 dB  
 PL2W 11.35402870 W  
 PL12W 0.21885175 W  
 SFO2 400.1108002 MHz

F2 - Processing parameters  
 SI 8192  
 SF 128.3711880 MHz  
 WDW EM  
 SSB 0  
 LB 50.00 Hz  
 GB 0  
 PC 1.40

# = glass background signal

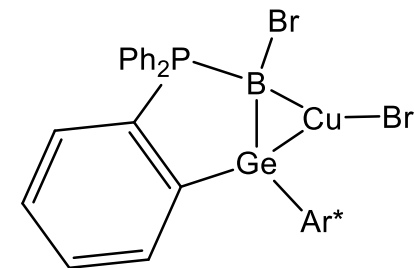

Figure SI51.  $^{11}\text{B}\{^1\text{H}\}$  NMR spectrum of compound **11**.

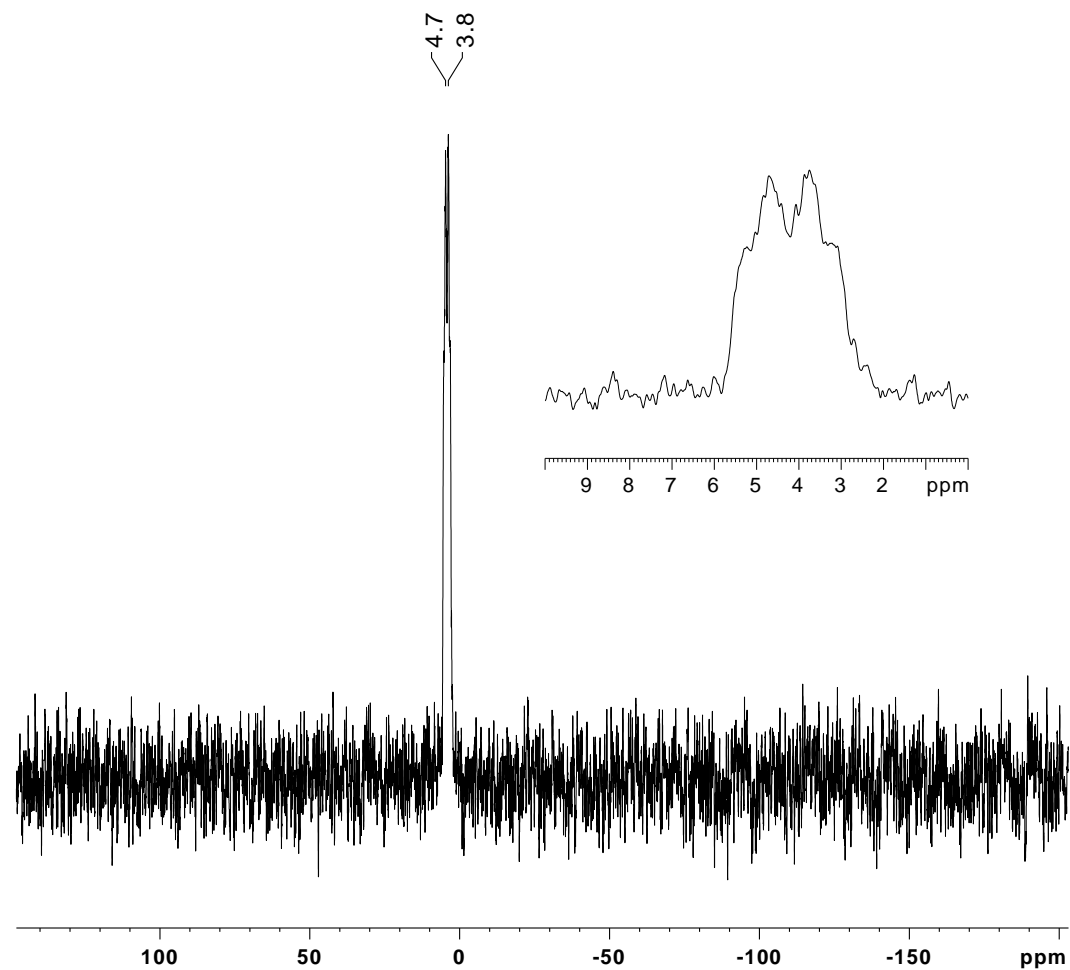

Current Data Parameters  
 NAME CR469\_400\_V  
 EXPNO 12  
 PROCNO 1

F2 - Acquisition Parameters  
 Date\_ 20220811  
 Time 16.01  
 INSTRUM spect  
 PROBHD 5 mm X,F/H,F B  
 PULPROG zgig30b  
 TD 88150  
 SOLVENT C6D6  
 NS 32  
 DS 0  
 SWH 65789.477 Hz  
 FIDRES 0.746336 Hz  
 AQ 0.6699400 sec  
 RG 23100  
 DW 7.600 usec  
 DE 6.00 usec  
 TE 300.2 K  
 D1 1.0000000 sec  
 D11 0.0300000 sec  
 TD0 1

===== CHANNEL f1 =====  
 NUC1 31P  
 P1 14.50 usec  
 PL1 -4.00 dB  
 PL1W 56.78615952 W  
 SFO1 161.9674970 MHz

===== CHANNEL f2 =====  
 CPDPRG2 waltz16  
 NUC2 1H  
 PCPD2 90.00 usec  
 PL2 -1.50 dB  
 PL12 15.65 dB  
 PL2W 11.35402870 W  
 PL12W 0.21885175 W  
 SFO2 400.1120007 MHz

F2 - Processing parameters  
 SI 131072  
 SF 161.9674970 MHz  
 WDW EM  
 SSB 0  
 LB 15.00 Hz  
 GB 0  
 PC 1.40

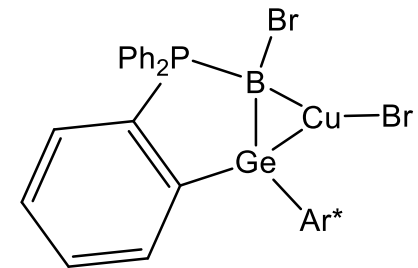

Figure SI52.  $^{31}\text{P}\{^1\text{H}\}$  NMR spectrum of compound 11.

NMR spectra of compound **12**.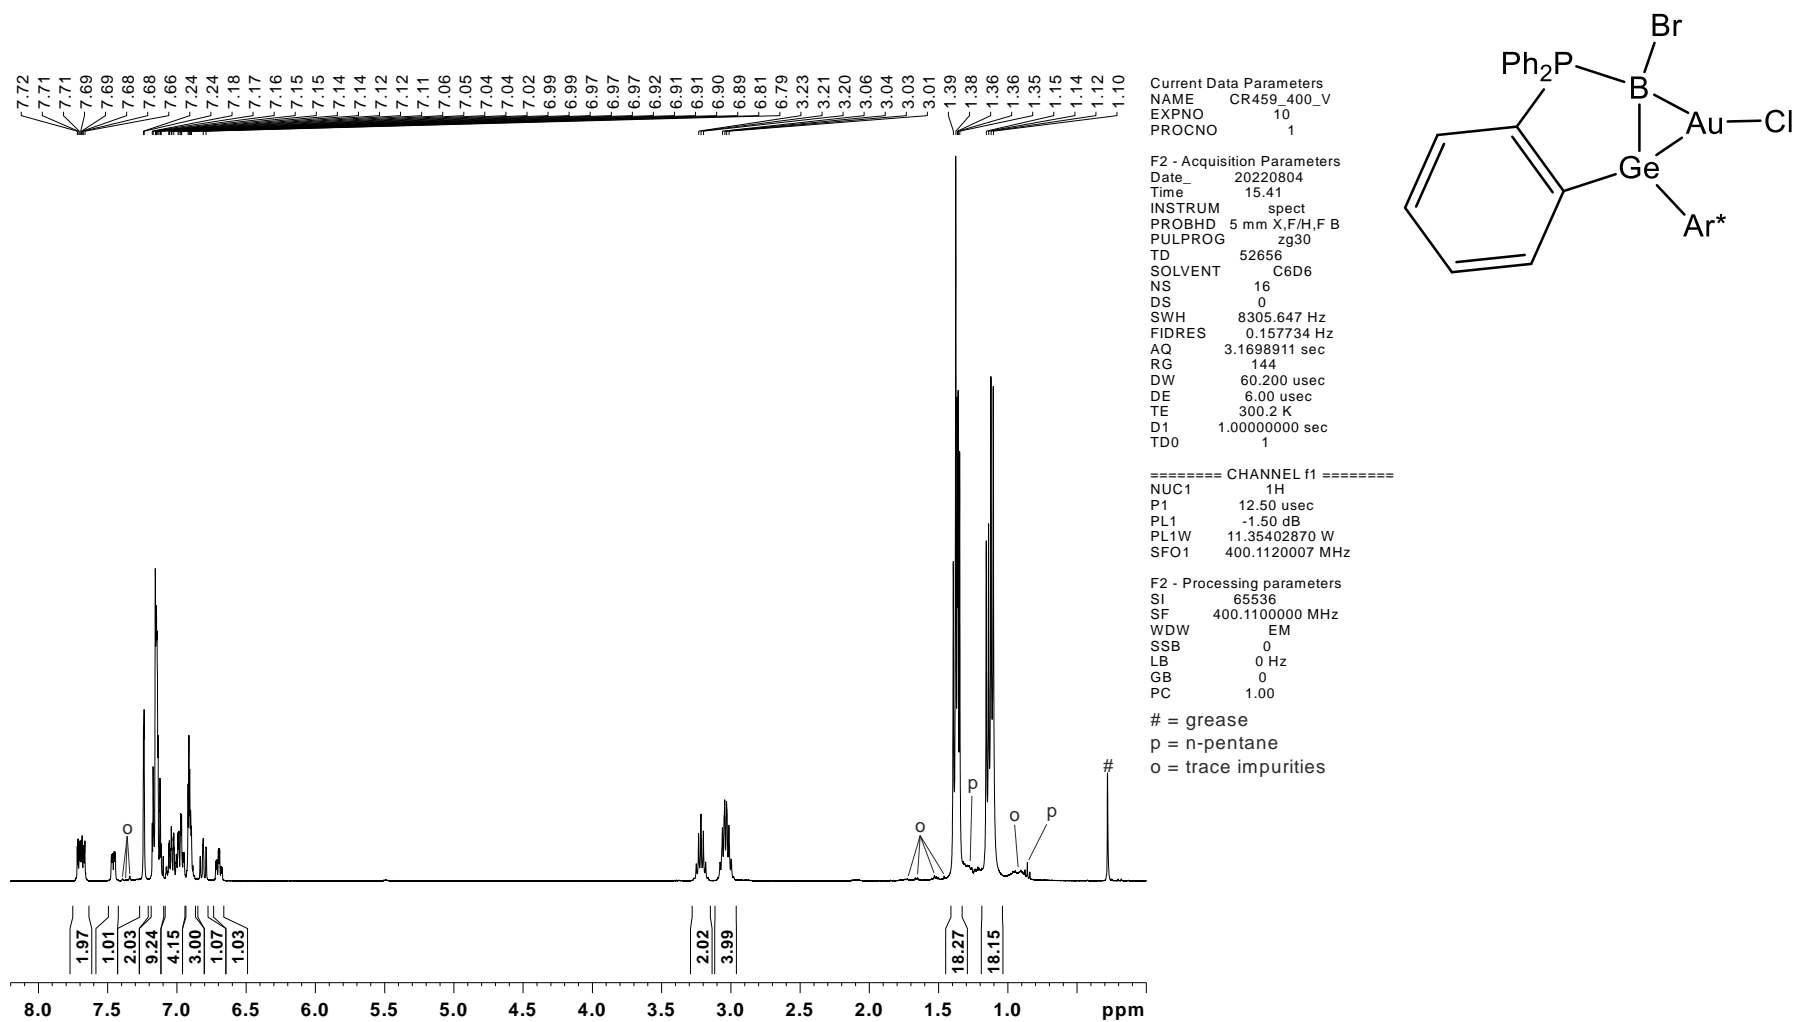Figure SI53. <sup>1</sup>H NMR spectrum of compound **12**.

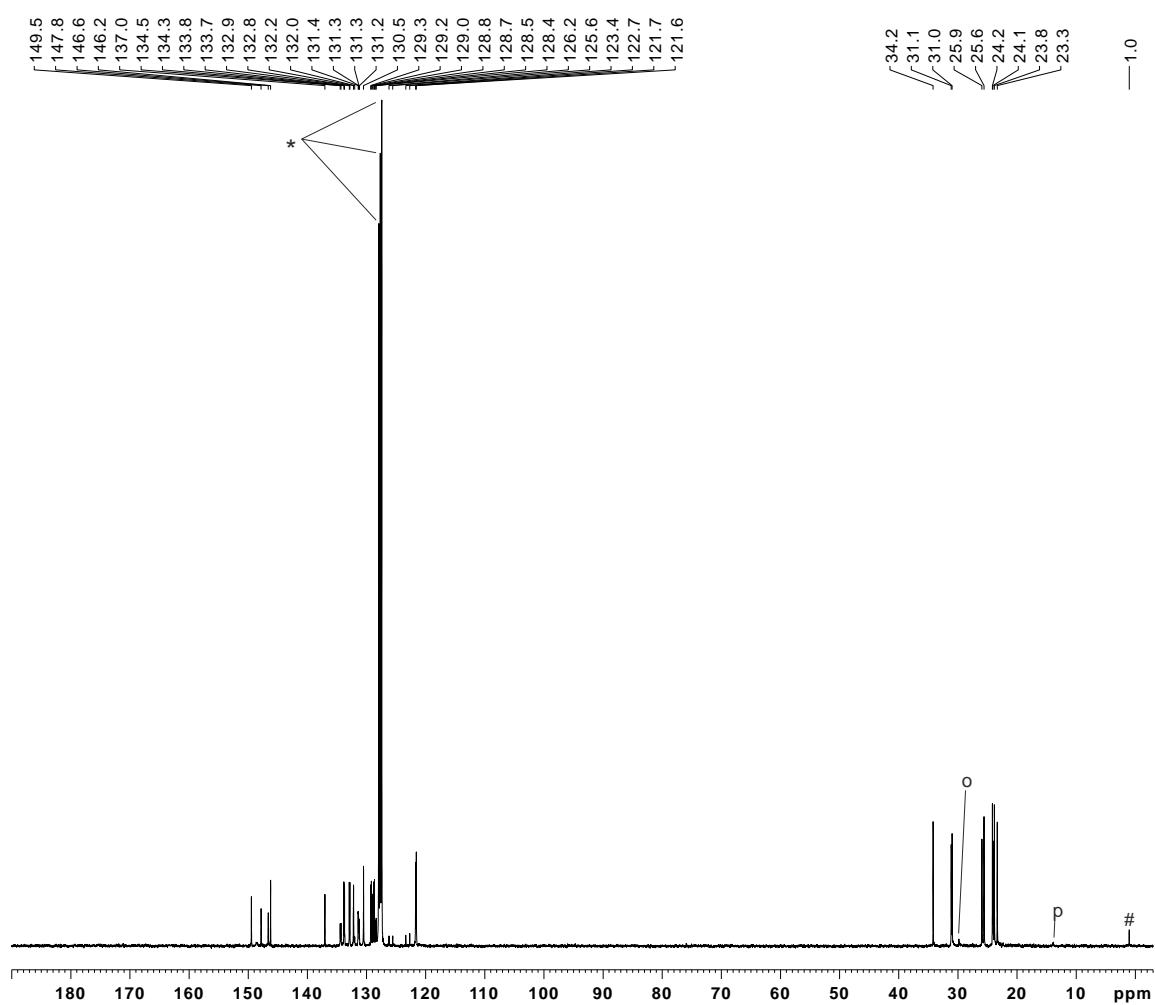

Current Data Parameters  
 NAME CR459\_400\_V\_2  
 EXPNO 17  
 PROCNO 1

F2 - Acquisition Parameters  
 Date\_ 20220805  
 Time 7.44  
 INSTRUM spect  
 PROBHD 5 mm X,F/H,F B  
 PULPROG udef  
 TD 22218  
 SOLVENT C6D6  
 NS 5700  
 DS 0  
 SWH 30864.197 Hz  
 FIDRES 1.389153 Hz  
 AQ 0.3599316 sec  
 RG 32800  
 DW 16.200 usec  
 DE 6.00 usec  
 TE 300.2 K  
 D1 3.00000000 sec  
 D11 0.03000000 sec  
 D12 0.00002000 sec  
 D20 100.00000000 sec  
 TD0 1

===== CHANNEL f1 =====  
 NUC1 13C  
 P1 14.40 usec  
 P13 2000.00 usec  
 P26 500.00 usec  
 PL1 -5.90 dB  
 PL1W 117.26847076 W  
 SFO1 100.6198135 MHz  
 SP8 -0.91 dB  
 SP13 1.39 dB  
 SPNAM[8] Crp60,0.5,20.1  
 SPNAM[13] Crp60comp,4  
 SPOAL8 0.500  
 SPOAL13 0.500  
 SPOFFS8 0 Hz  
 SPOFFS13 0 Hz

===== CHANNEL f2 =====  
 CPDPRG[2] waltz16  
 NUC2 1H  
 PCPD2 90.00 usec  
 PL2 -1.50 dB  
 PL12 15.65 dB  
 PL2W 11.35402870 W  
 PL12W 0.21885175 W  
 SFO2 400.1120007 MHz

F2 - Processing parameters  
 SI 131072  
 SF 100.6077400 MHz  
 WDW EM  
 SSB 0  
 LB 2.00 Hz  
 GB 0  
 PC 1.40

p = *n*-pentane  
 # = grease  
 o = trace impurity  
 \* = C<sub>6</sub>D<sub>6</sub>

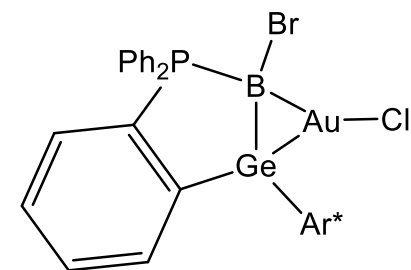

Figure SI54. <sup>13</sup>C{<sup>1</sup>H} NMR spectrum of compound **12**.

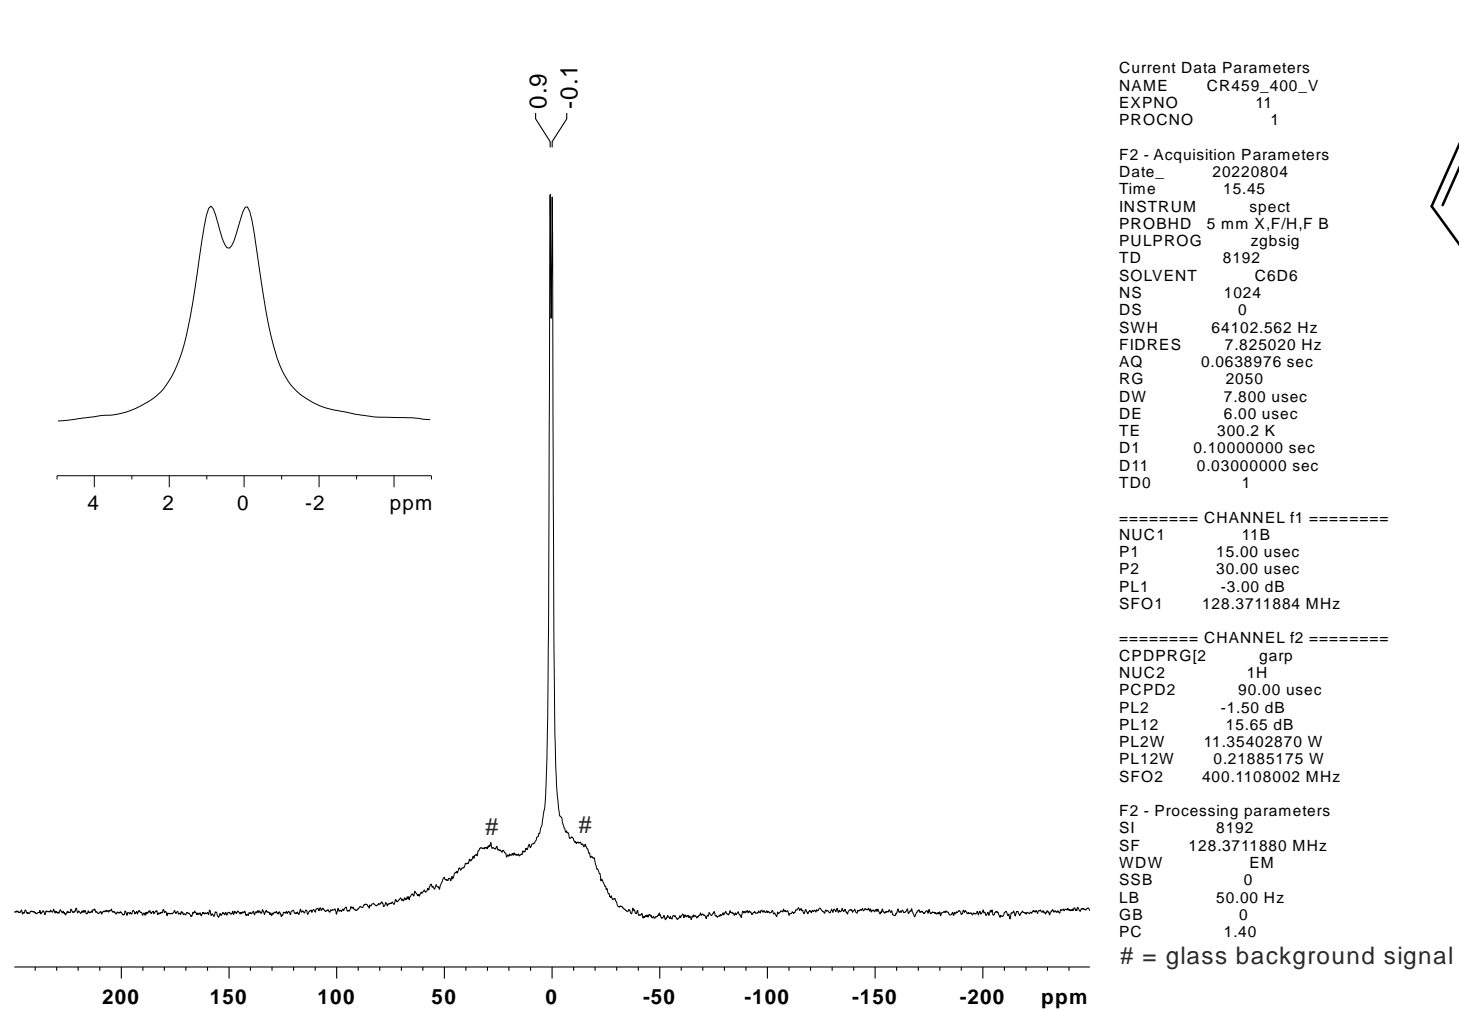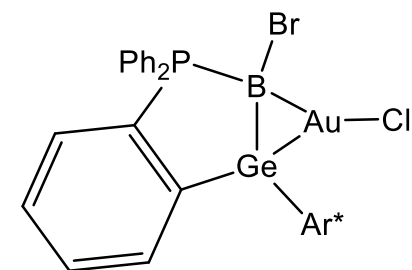

Figure SI55.  $^{11}\text{B}\{^1\text{H}\}$  NMR spectrum of compound **12**.

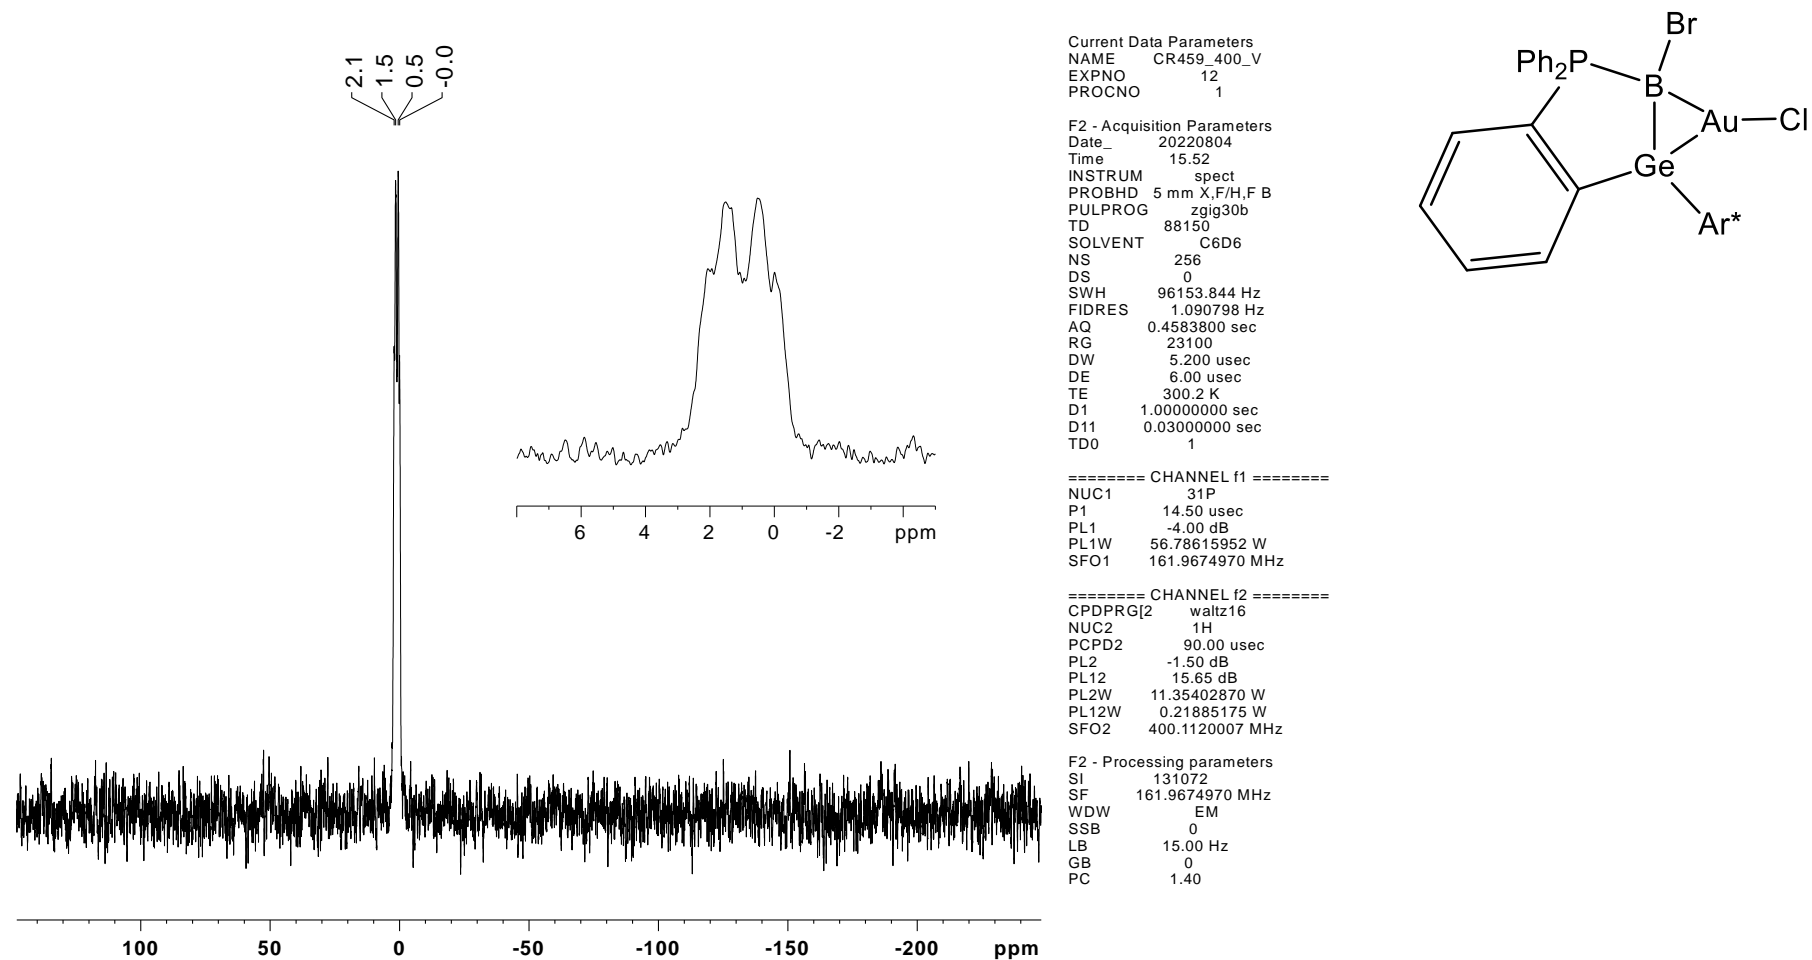Figure SI56.  $^{31}\text{P}\{^1\text{H}\}$  NMR spectrum of compound **12**.

NMR spectra of compound **13**.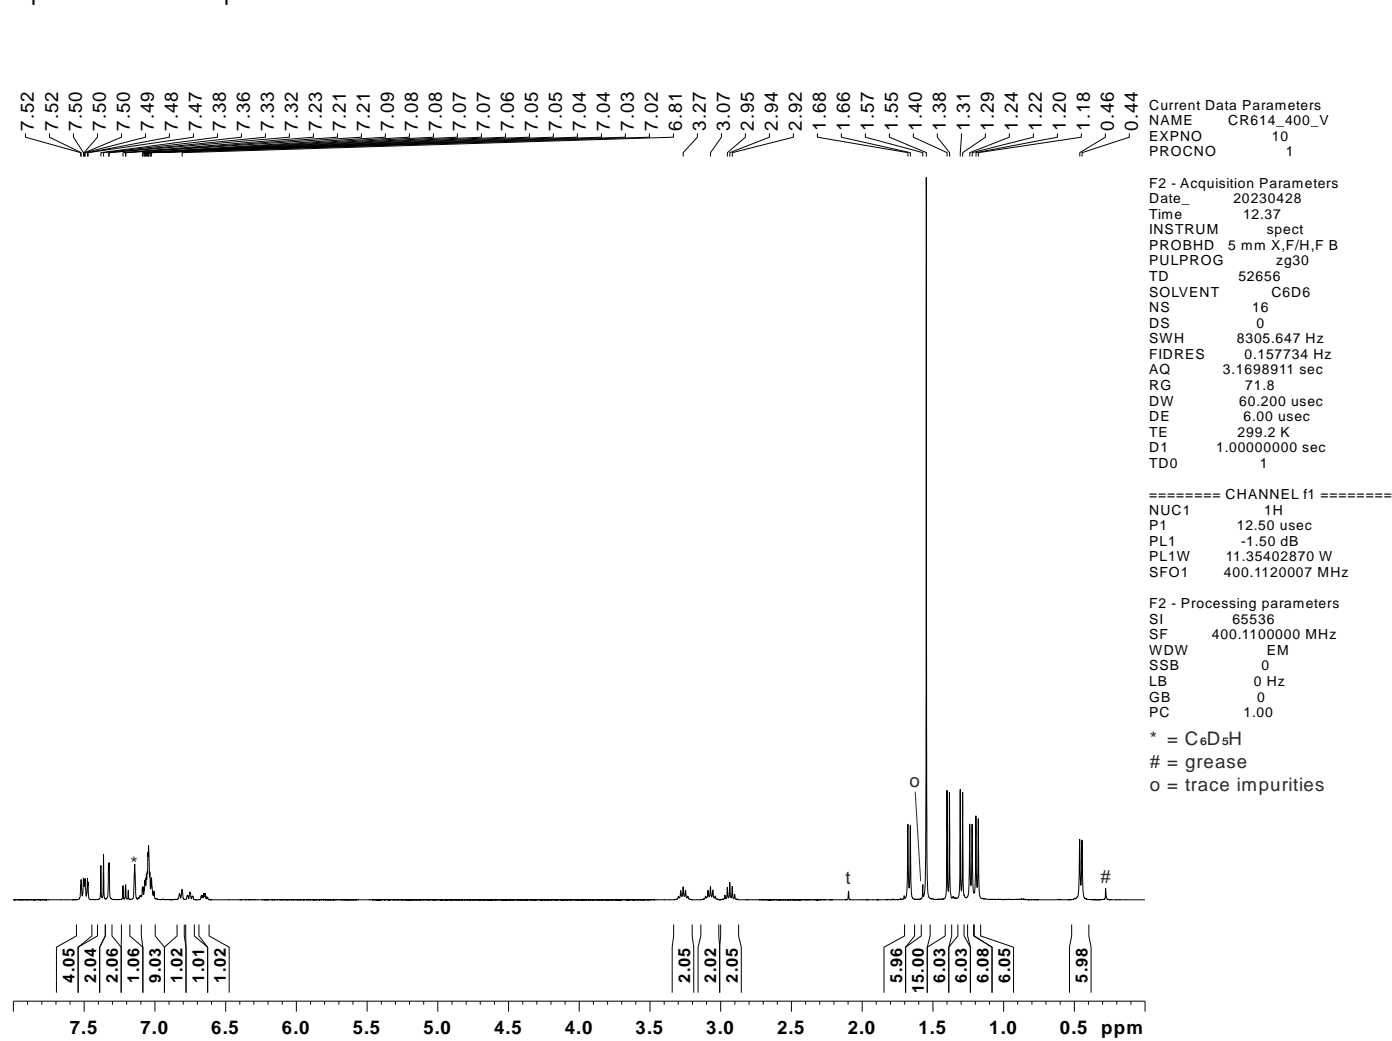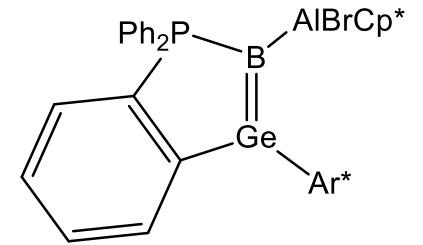Figure SI57. <sup>1</sup>H NMR spectrum of compound **13**.

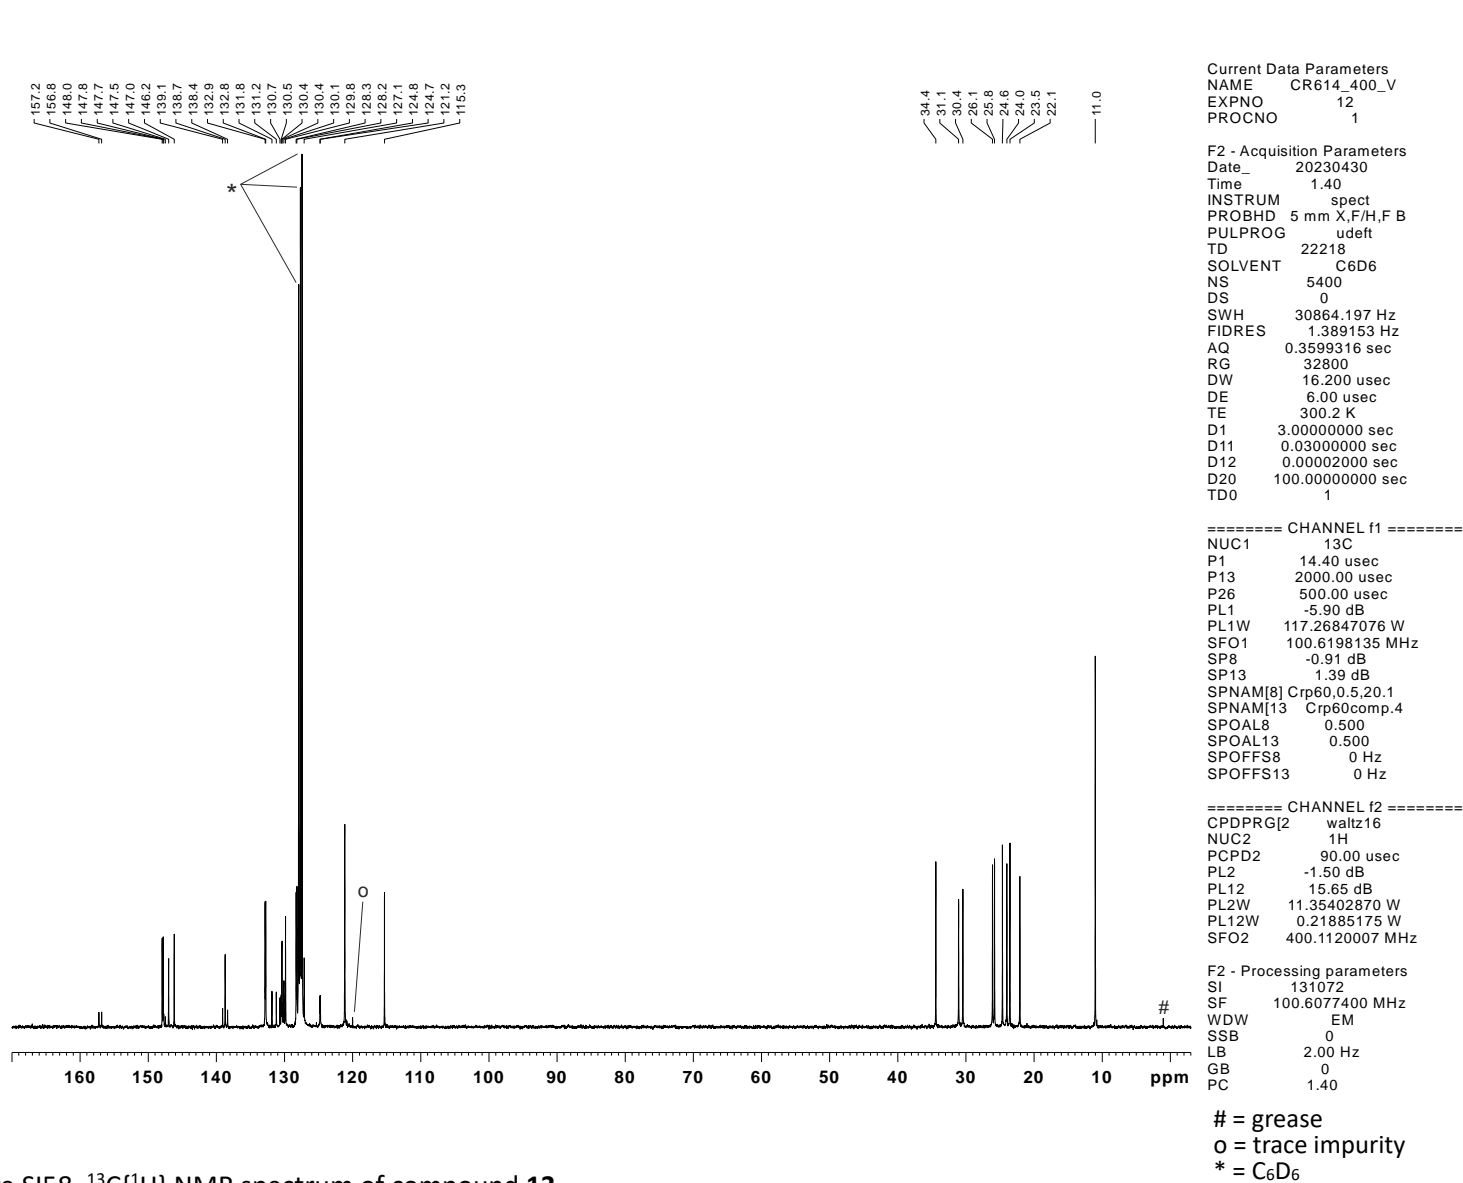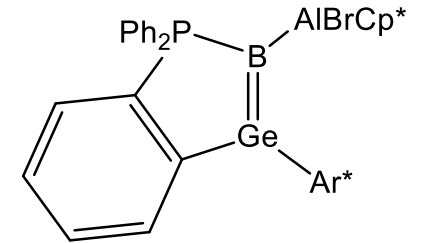

Figure SI58.  $^{13}\text{C}\{^1\text{H}\}$  NMR spectrum of compound **13**.



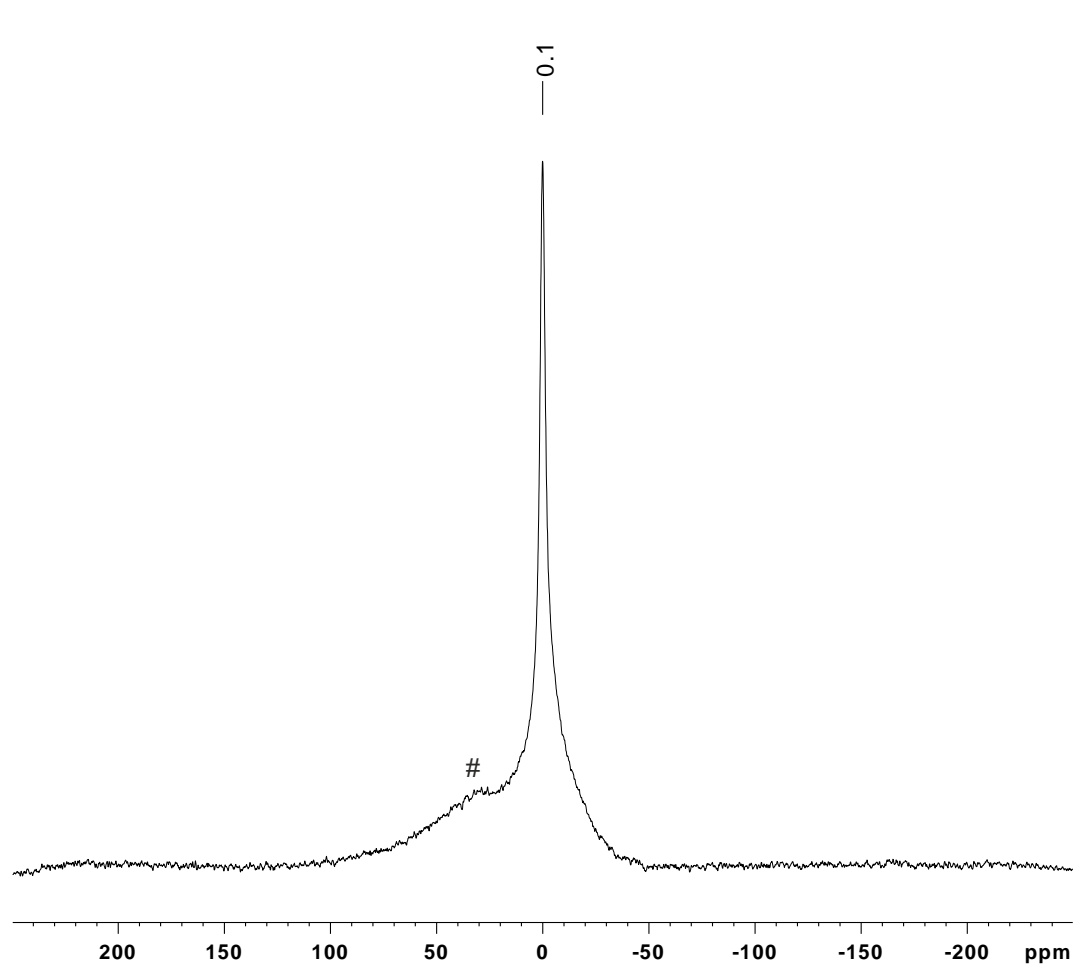

Current Data Parameters  
 NAME CR614\_400  
 EXPNO 21  
 PROCNO 1

F2 - Acquisition Parameters  
 Date\_ 20230427  
 Time 17.09  
 INSTRUM spect  
 PROBHD 5 mm X,F/H,F B  
 PULPROG zgbsig  
 TD 8192  
 SOLVENT C6D6  
 NS 1024  
 DS 0  
 SWH 64102.562 Hz  
 FIDRES 7.825020 Hz  
 AQ 0.0638976 sec  
 RG 2050  
 DW 7.800 usec  
 DE 6.00 usec  
 TE 299.2 K  
 D1 0.1000000 sec  
 D11 0.0300000 sec  
 TD0 1

===== CHANNEL f1 =====  
 NUC1 11B  
 P1 15.00 usec  
 P2 30.00 usec  
 PL1 -3.00 dB  
 SFO1 128.3711884 MHz

===== CHANNEL f2 =====  
 CPDPRG2 garp  
 NUC2 1H  
 PCPD2 90.00 usec  
 PL2 -1.50 dB  
 PL12 15.65 dB  
 PL2W 11.35402870 W  
 PL12W 0.21885175 W  
 SFO2 400.1108002 MHz

F2 - Processing parameters  
 SI 8192  
 SF 128.3711880 MHz  
 WDW EM  
 SSB 0  
 LB 50.00 Hz  
 GB 0  
 PC 1.40

# = glass background signal

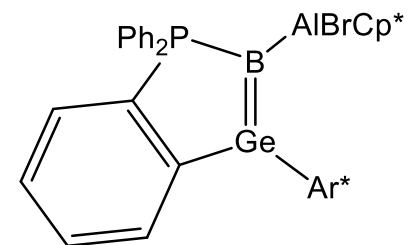

Figure SI59.  $^{11}\text{B}\{^1\text{H}\}$  NMR spectrum of compound **13**.

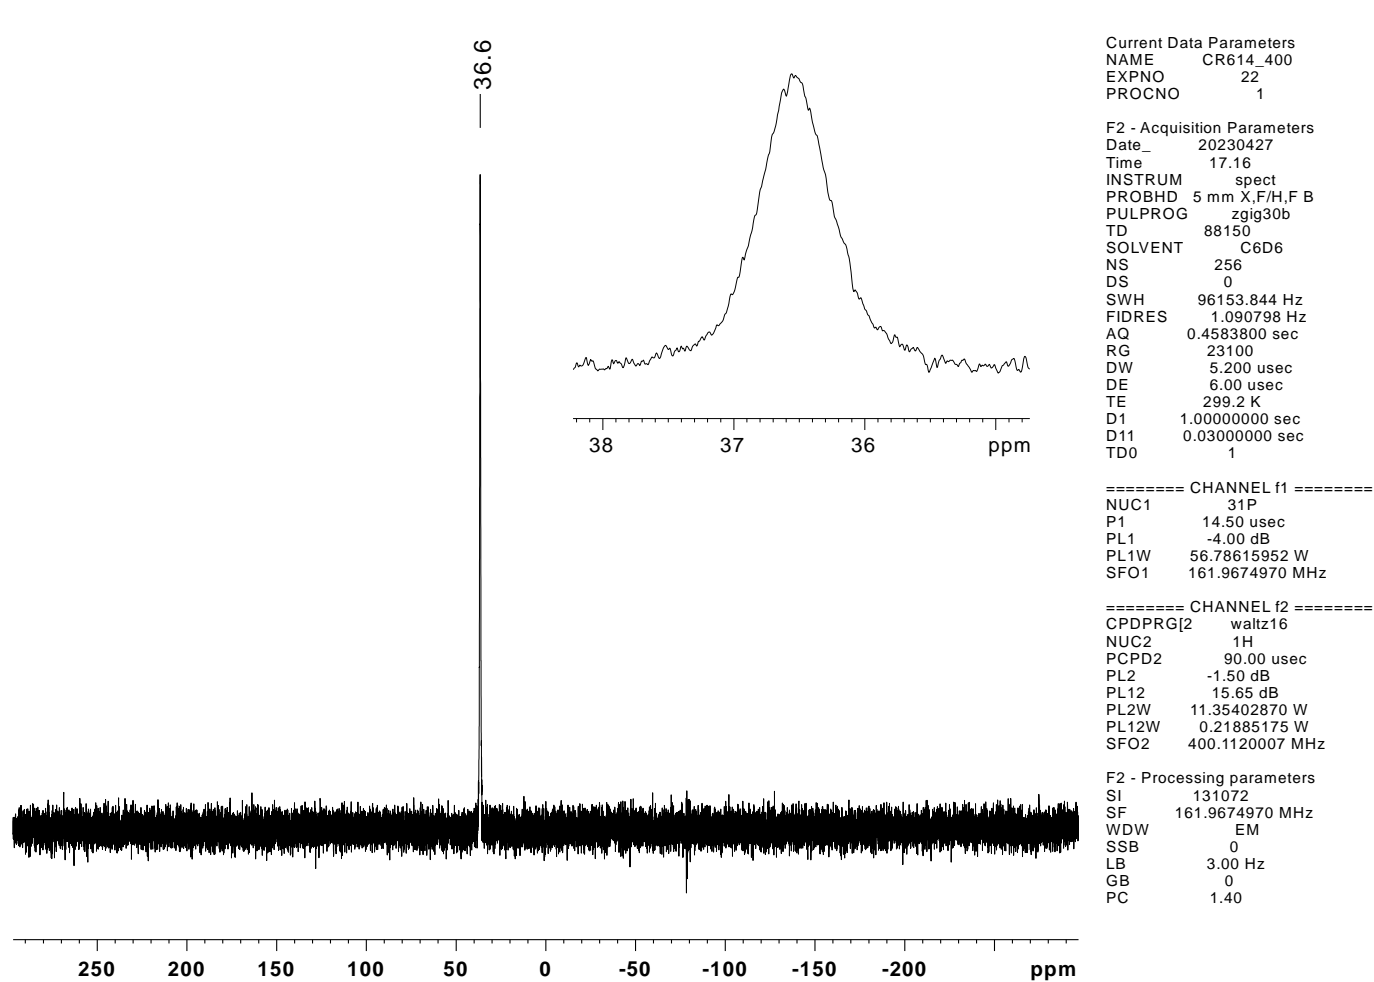Figure SI60.  $^{31}\text{P}\{^1\text{H}\}$  NMR spectrum of compound 13.

NMR spectra of compound **14**.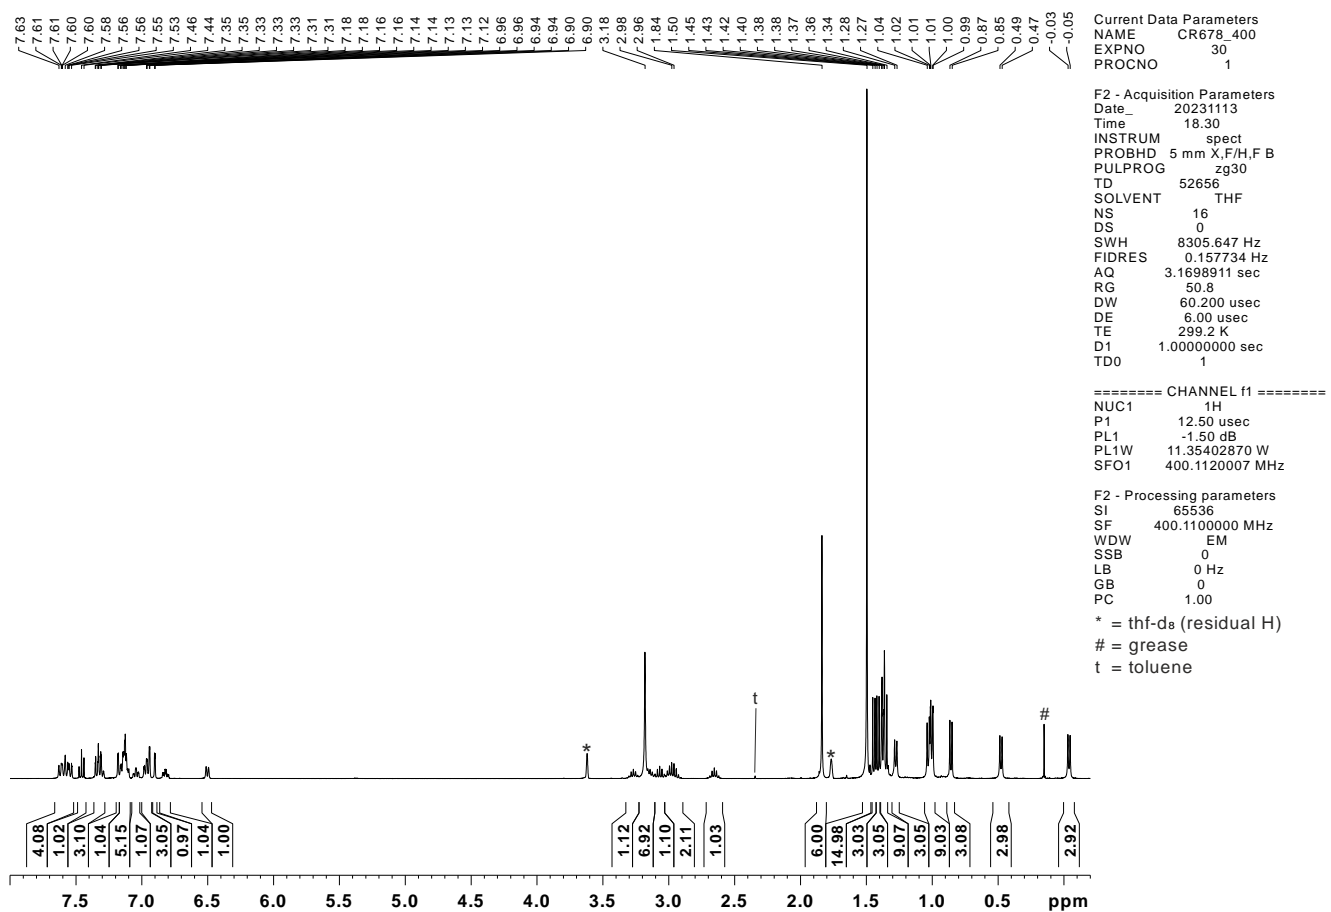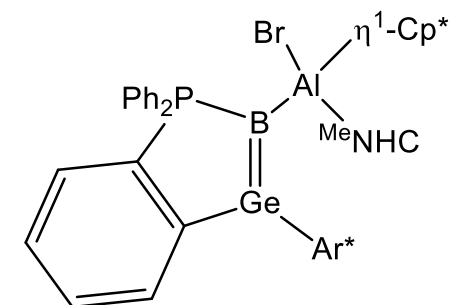Figure SI61. <sup>1</sup>H NMR spectrum of compound **14**.

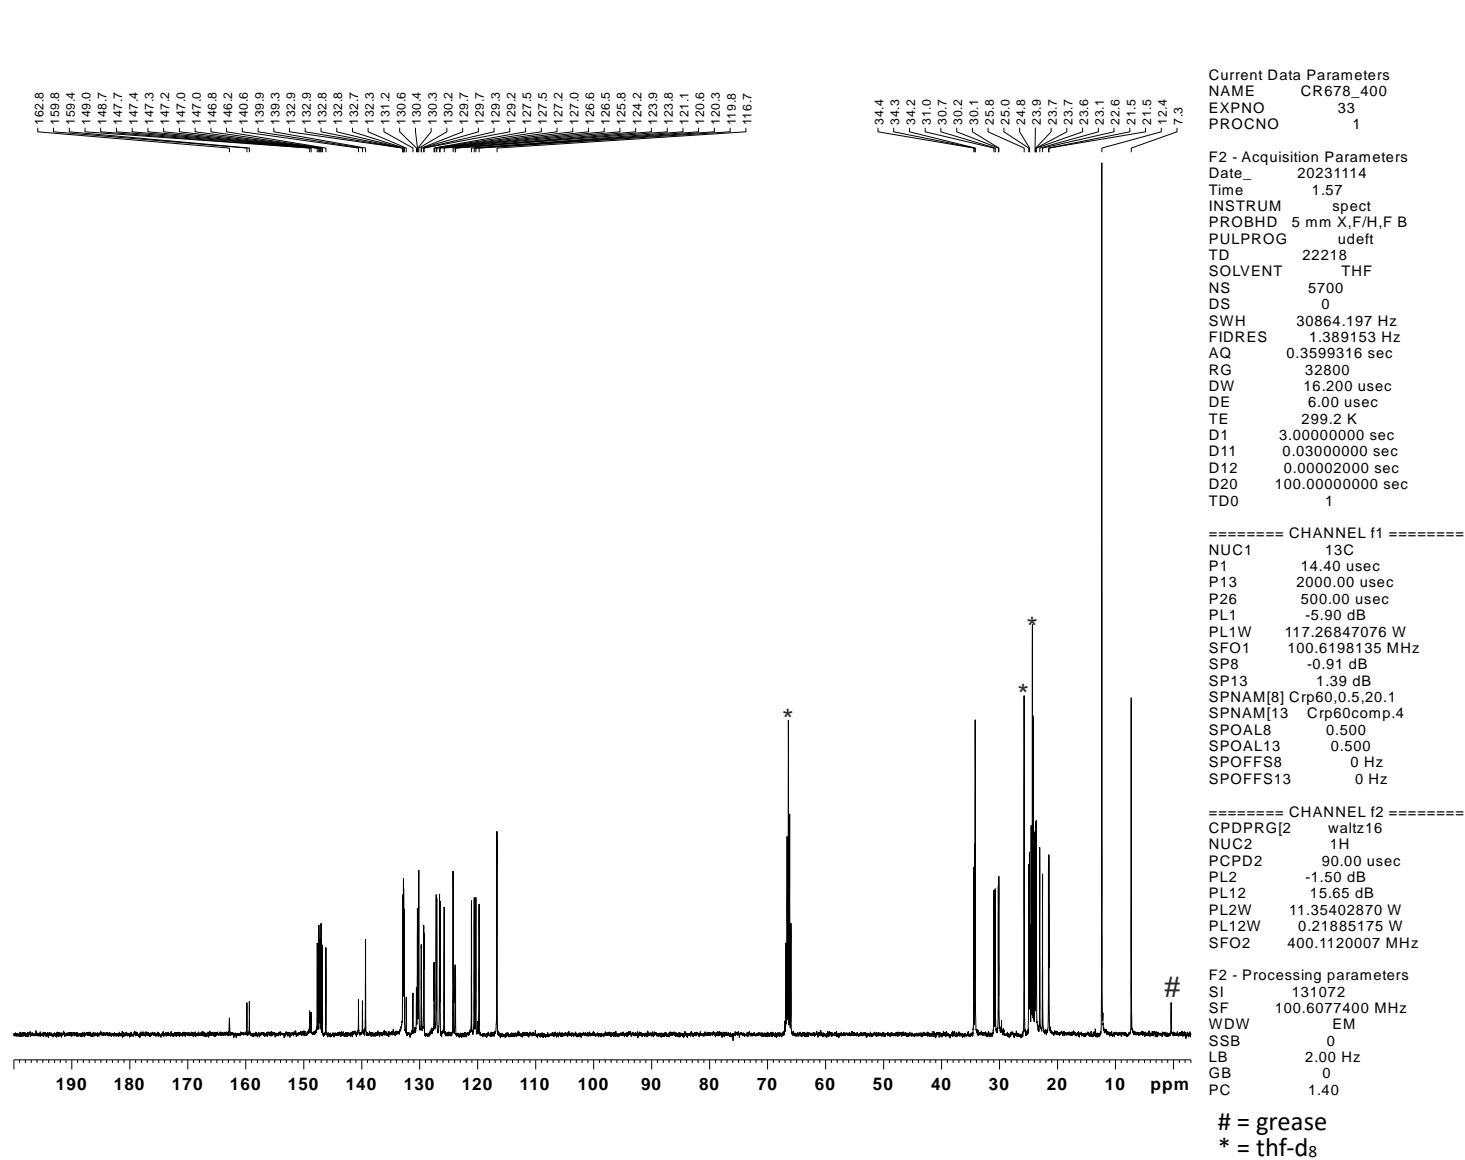Figure SI62.  $^{13}\text{C}\{^1\text{H}\}$  NMR spectrum of compound **14**.

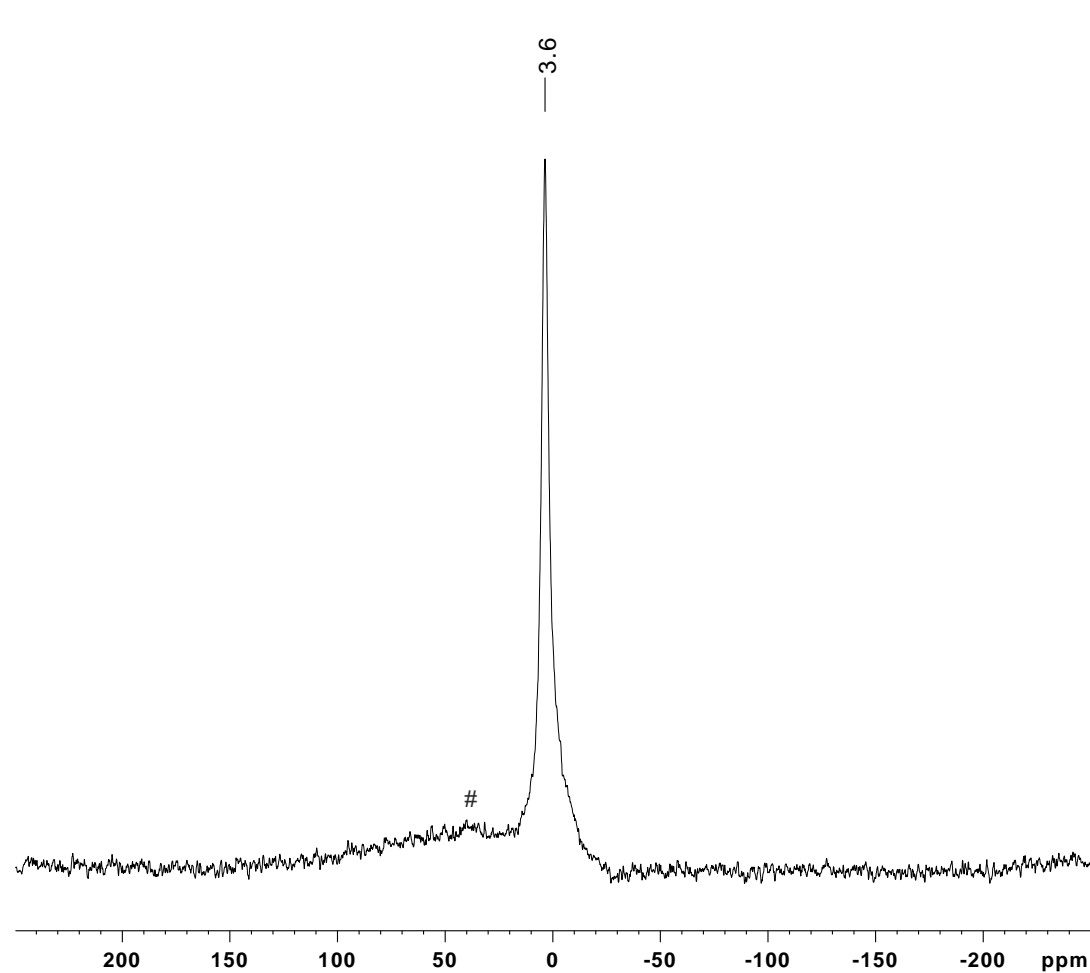

Current Data Parameters  
 NAME CR678\_400  
 EXPNO 21  
 PROCNO 1

F2 - Acquisition Parameters  
 Date\_ 20231113  
 Time 16.01  
 INSTRUM spect  
 PROBHD 5 mm X,F/H,F B  
 PULPROG zgbsig  
 TD 8192  
 SOLVENT THF  
 NS 1024  
 DS 0  
 SWH 64102.562 Hz  
 FIDRES 7.825020 Hz  
 AQ 0.0638976 sec  
 RG 2050  
 DW 7.800 usec  
 DE 6.00 usec  
 TE 299.2 K  
 D1 0.10000000 sec  
 D11 0.03000000 sec  
 TD0 1

===== CHANNEL f1 =====  
 NUC1 11B  
 P1 15.00 usec  
 P2 30.00 usec  
 PL1 -3.00 dB  
 SFO1 128.3711884 MHz

===== CHANNEL f2 =====  
 CPDPRG[2] garp  
 NUC2 1H  
 PCPD2 90.00 usec  
 PL2 -1.50 dB  
 PL12 15.65 dB  
 PL2W 11.35402870 W  
 PL12W 0.21885175 W  
 SFO2 400.1108002 MHz

F2 - Processing parameters  
 SI 8192  
 SF 128.3711880 MHz  
 WDW EM  
 SSB 0  
 LB 50.00 Hz  
 GB 0  
 PC 1.40

# = glass background signal

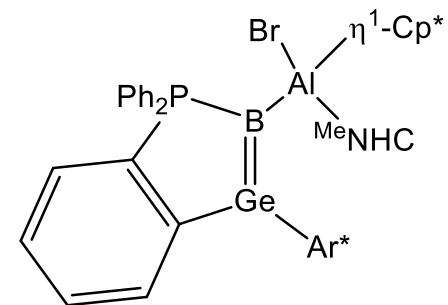

Figure SI63.  $^{11}\text{B}\{^1\text{H}\}$  NMR spectrum of compound 14.

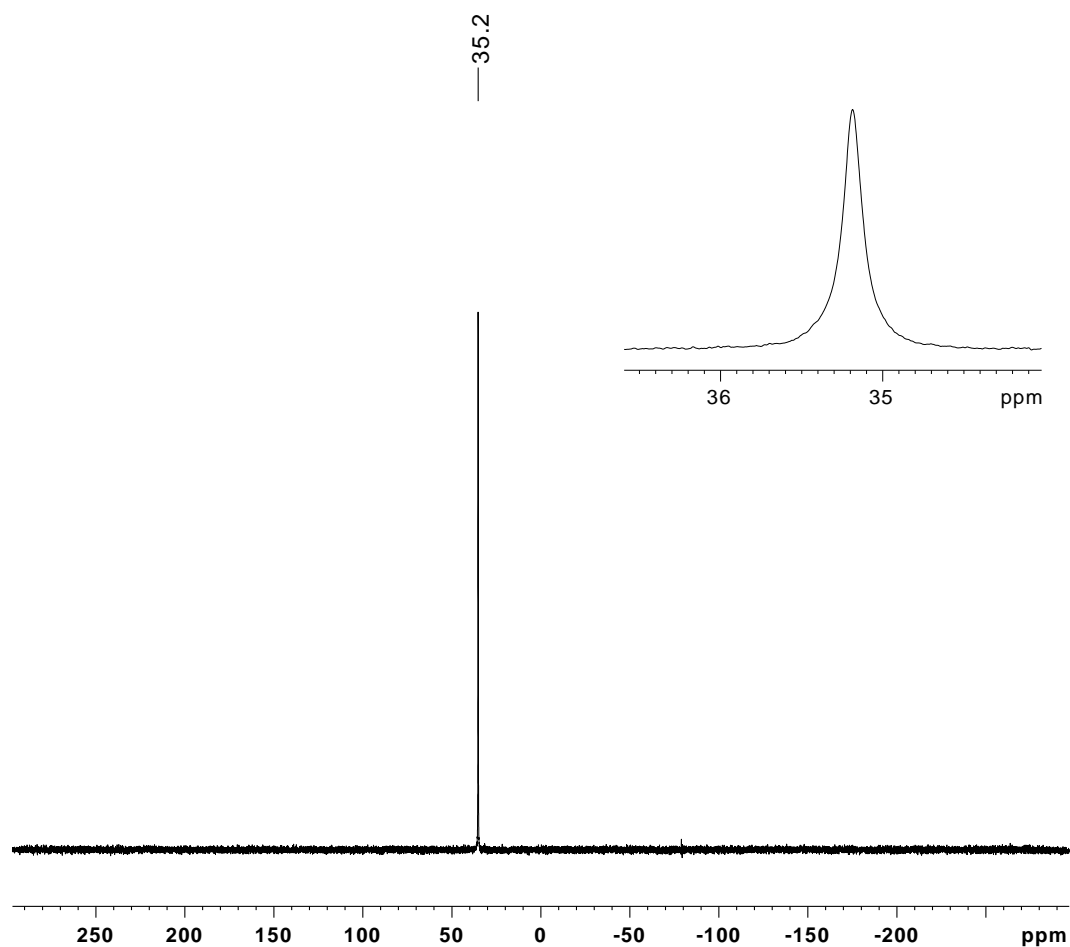

Current Data Parameters  
 NAME CR678\_400  
 EXPNO 22  
 PROCNO 1

F2 - Acquisition Parameters  
 Date\_ 20231113  
 Time 16.08  
 INSTRUM spect  
 PROBHD 5 mm X,F/H,F B  
 PULPROG zgig30b  
 TD 88150  
 SOLVENT THF  
 NS 256  
 DS 0  
 SWH 96153.844 Hz  
 FIDRES 1.090798 Hz  
 AQ 0.4583800 sec  
 RG 23100  
 DW 5.200 usec  
 DE 6.00 usec  
 TE 299.2 K  
 D1 1.00000000 sec  
 D11 0.03000000 sec  
 TD0 1

==== CHANNEL f1 =====  
 NUC1 31P  
 P1 14.50 usec  
 PL1 -4.00 dB  
 PL1W 56.78615952 W  
 SFO1 161.9674970 MHz

==== CHANNEL f2 =====  
 CPDPRG2 waltz16  
 NUC2 1H  
 PCPD2 90.00 usec  
 PL2 -1.50 dB  
 PL12 15.65 dB  
 PL2W 11.35402870 W  
 PL12W 0.21885175 W  
 SFO2 400.1120007 MHz

F2 - Processing parameters  
 SI 131072  
 SF 161.9674970 MHz  
 WDW EM  
 SSB 0  
 LB 3.00 Hz  
 GB 0  
 PC 1.40

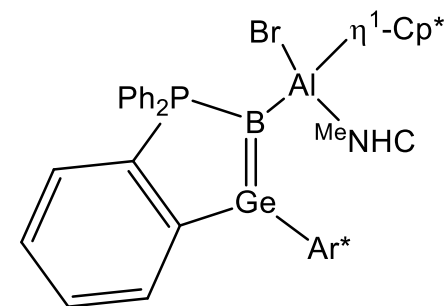

Figure SI64.  $^{31}\text{P}\{^1\text{H}\}$  NMR spectrum of compound **14**.

## Quantum chemical calculations

On the basis of the molecular structures of **2-6** and **10-14** determined in the solid state, the structures of the compounds were optimized using the programme Orca5.0.3<sup>10-12</sup> along with BP86,<sup>13,14</sup> Grimme's dispersion correction and Becke-Johnson damping (D3BJ) and  $\omega$ B97X-D3BJ with suitable RI approximations (RI/ RIJCOSX).<sup>15</sup> The basis sets employed were def2-TZVP for Ge, B, P, Fe, Cu, Au, Al as implemented in ORCA5.0.3, and def2-SVP on all other elements.<sup>16-19</sup> For all calculations, tight or very tight convergence criteria were applied for optimisations and SCF convergence, respectively. All optimized structures were obtained without imaginary frequencies. With the BP86 functional for the structure of **4** the C-N-C angle shows a deviation in comparison to the solid-state structure. With the  $\omega$ B97X-D3 functional the optimization of **4** results to give a structure closely related to the solid-state structure. Plots were generated using ChemCraft.<sup>20</sup>

Table S13. Selected results of DFT calculations of compounds **10-12**.

|                       | <b>10</b> Ge-B-Fe           | <b>11</b> Ge-B-Cu | <b>12</b> Ge-B-Au |
|-----------------------|-----------------------------|-------------------|-------------------|
| Ge-B [Å]              | 2.02490                     | 1.95526           | 1.97512           |
| Ge-M [Å]              | 2.48139                     | 2.45643           | 2.53527           |
| B-M [Å]               | 2.30915                     | 2.07624           | 2.18856           |
| q [e] Ge, B, M        | 1.11, -0.57, -0.63          | 1.04, -0.87, 0.69 | 1.04, -0.54, 0.43 |
| $\sigma$ -donor, occ. | 0.6423                      | 1.6544            | 1.8953            |
| Ge, B, M %            | 18.1, 32.3, 16,1, (12.6 C5) | 32.0, 50.8, 9.0   | 28.0, 41.9, 25.0  |
| $\pi$ -acceptor, occ. | 1.4992                      | 1.8669            | 1.8291            |
| Ge, B, M %            | 4.7, 4.0, 75.0              | 3.4, 2.3, 93.4    | 4.5, 3.2, 91.5    |

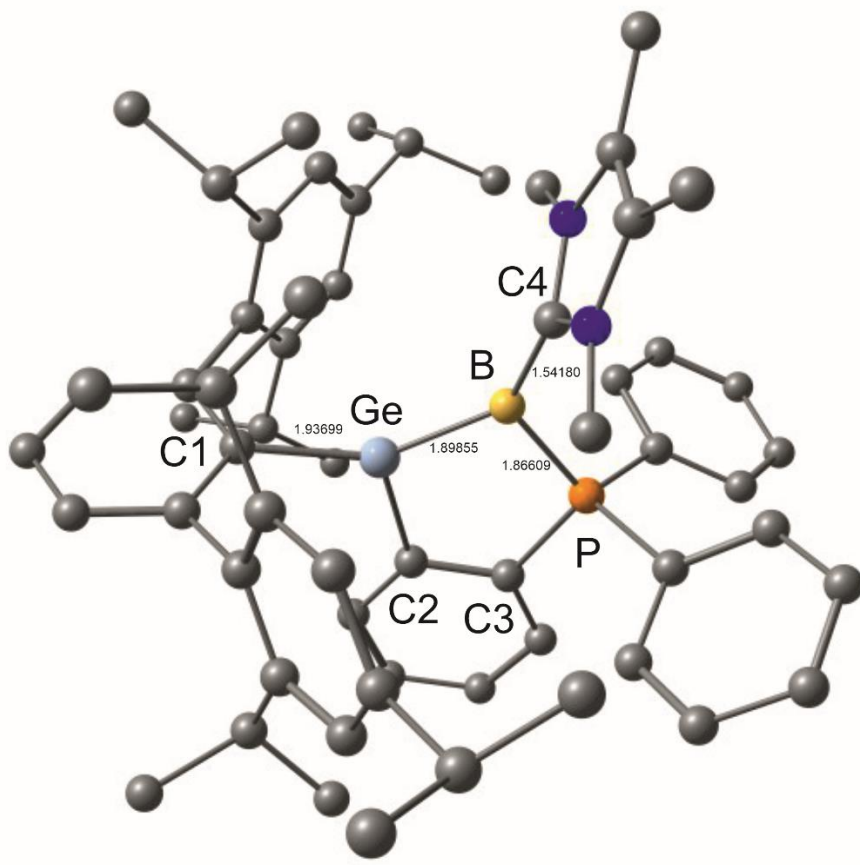

Figure SI65. Optimized structure of compound 2.

### Coordinates of compound 2.

141

Coordinates from ORCA-job bp86optfreq\_hnumac

|    |                  |                   |                   |
|----|------------------|-------------------|-------------------|
| Ge | 4.81296271332917 | 9.67459191240911  | 13.48539842017036 |
| P  | 3.94393637839571 | 12.41336042288949 | 12.88988018449563 |
| N  | 4.37832081630372 | 10.68364823908215 | 9.56544462342950  |
| N  | 6.42107223555539 | 11.23397515966275 | 10.04679695130622 |
| C  | 6.67669842764679 | 6.20334778741139  | 14.96496928827131 |
| H  | 7.66890006342324 | 5.92456454205708  | 15.35052478294876 |
| C  | 5.63036145351135 | 5.26584360017566  | 14.95637770368393 |
| H  | 5.79826600457670 | 4.25768623064214  | 15.36436890417652 |
| C  | 6.95511793737933 | 15.08230229236177 | 13.55192601275232 |
| H  | 8.02749174070505 | 15.01843394079294 | 13.78786762949373 |
| C  | 8.07147308303895 | 7.39037735010474  | 11.99609185662951 |
| H  | 7.13442320247242 | 6.86252519998196  | 12.26531023204369 |
| C  | 5.20977910090201 | 10.96169160116614 | 10.60932130880219 |
| C  | 6.32175206071096 | 16.33577201319463 | 13.47430787457993 |
| H  | 6.90167316395792 | 17.25596211931428 | 13.64101258474763 |
| C  | 7.13866807370936 | 9.48474321811163  | 16.58936698388287 |
| H  | 6.15741990736304 | 8.99243551092652  | 16.42872776848602 |
| C  | 6.36303879707374 | 11.11977967494406 | 8.65736453222708  |
| C  | 5.05948379947672 | 10.77020874133779 | 8.35065125097317  |



|   |                   |                   |                   |
|---|-------------------|-------------------|-------------------|
| C | 2.36827909419313  | 13.54041622086284 | 10.85805193080990 |
| H | 3.26666944539007  | 14.09865784092584 | 10.55428965038007 |
| C | 4.38669884731200  | 5.58638314011263  | 14.38608451960241 |
| H | 3.59619686063653  | 4.82369868818575  | 14.32182707603316 |
| C | 3.55904088509389  | 11.93823091651502 | 14.59781235094903 |
| C | 6.21979843219027  | 13.90921332548631 | 13.33202165634609 |
| H | 6.70053479551189  | 12.92059467133504 | 13.40569123597968 |
| C | 6.47152431180209  | 7.49814267407802  | 14.44875983423397 |
| C | 5.19085855064375  | 7.83194632037905  | 13.94777241159950 |
| C | 6.87735417346272  | 10.89101541185028 | 17.14815975585713 |
| H | 6.37859241372765  | 11.54075546622501 | 16.40185910915077 |
| H | 7.81690129342957  | 11.38753583403022 | 17.46736786805096 |
| H | 6.22181497343451  | 10.83748767912161 | 18.03972156490375 |
| C | 3.97844005107343  | 10.63956823782514 | 14.97475479113440 |
| C | 4.15206018211332  | 6.87334985722155  | 13.86093831105814 |
| C | 2.97459538204015  | 10.32444058065571 | 9.70561579269997  |
| H | 2.32330435605625  | 11.17102996769301 | 9.41603067251477  |
| H | 2.78998696382188  | 10.06090920843789 | 10.76256234849942 |
| H | 2.74833575934312  | 9.44891025538415  | 9.07391307237985  |
| C | 4.84133219594085  | 13.98662627546734 | 13.03706136795019 |
| C | 2.38918561938305  | 12.73735668282304 | 12.01886898860499 |
| C | 1.19880643855221  | 13.61939622224981 | 10.08349828062496 |
| H | 1.18184764225927  | 14.25183772385977 | 9.18297821920721  |
| C | 7.85488630370842  | 9.49077643618219  | 15.24569685404187 |
| C | 7.55094324313237  | 11.33189692791493 | 7.78272872456383  |
| H | 7.26797783700650  | 11.23299072523182 | 6.71883516723254  |
| H | 8.34771355174448  | 10.58583397414628 | 7.98684957561250  |
| H | 7.99349770245105  | 12.33986179372671 | 7.92185434593881  |
| C | 10.67290544036327 | 11.47722680411420 | 13.52059276164160 |
| H | 11.07500988806917 | 11.27809307783401 | 12.50245550073906 |
| C | 8.84253578361629  | 10.45313306369916 | 14.97273538190191 |
| H | 9.04712473978618  | 11.22959944349040 | 15.72444891746384 |
| C | 9.58878365878263  | 10.43990862353905 | 13.77992483181094 |
| C | 4.40177173721225  | 10.48732156396149 | 7.04375923771607  |
| H | 5.10462918683216  | 10.66796567888435 | 6.21005343699728  |
| H | 3.51224446754241  | 11.13072606217887 | 6.88327765194786  |
| H | 4.06521604215171  | 9.43136242232005  | 6.97556012219062  |
| C | 4.94767602057961  | 16.41422602630978 | 13.19221321006769 |
| H | 4.44961597398606  | 17.39413770111006 | 13.14146320582177 |
| C | 2.73053381343973  | 12.37730209669124 | 16.83036774596268 |
| H | 2.24508408485244  | 13.04742686735707 | 17.55504397744589 |
| C | 11.83701285409978 | 11.33213079215794 | 14.51902996290581 |
| H | 12.25981317559379 | 10.30817575662649 | 14.49499049225545 |
| H | 11.50016187998116 | 11.53227170890154 | 15.55738329779612 |
| H | 12.65140428134980 | 12.04815806991186 | 14.28581801121896 |

|   |                   |                   |                   |
|---|-------------------|-------------------|-------------------|
| C | 9.31760036362257  | 9.42869325549919  | 12.84456604468465 |
| H | 9.90973688074999  | 9.39747605428805  | 11.91533023050649 |
| C | 7.58235500492848  | 8.49104097870314  | 14.27171230721181 |
| C | 2.94301139349389  | 12.81018017562946 | 15.50805889669187 |
| H | 2.63578918710618  | 13.82058655102409 | 15.19774523053559 |
| C | 8.31652700497450  | 8.46198676444022  | 13.05497449481821 |
| C | 9.20362670408759  | 6.34623696970311  | 12.00879728307716 |
| H | 9.00597365400868  | 5.53787777145730  | 11.27515949159090 |
| H | 9.30683449613434  | 5.88338934533919  | 13.01033219109660 |
| H | 10.17942374555016 | 6.80894062734357  | 11.75241841321059 |
| C | 4.16857421316249  | 6.39582809762820  | 10.98086514741868 |
| H | 5.04036379824569  | 6.54322064140692  | 11.65055348457703 |
| C | 4.20250913805998  | 15.24283259967165 | 12.97992720190155 |
| H | 3.12433725975849  | 15.30884503507049 | 12.77344846075998 |
| C | 3.14835799663327  | 11.09483818016128 | 17.22266041334805 |
| H | 2.98987972596399  | 10.76247453716652 | 18.25984074896038 |
| C | 4.52259577350694  | 7.04740830903420  | 9.63570009743691  |
| H | 5.42586613849278  | 6.57282869004855  | 9.20428451540425  |
| H | 4.73690965579297  | 8.12688188226528  | 9.75747529937206  |
| H | 3.71118854866336  | 6.93312891599991  | 8.88720624761996  |
| C | 7.60068809698010  | 11.61452322366276 | 10.80881244321752 |
| H | 8.48793042978241  | 11.08317852914669 | 10.42220802530295 |
| H | 7.43907949166938  | 11.31628218143602 | 11.86072804693704 |
| H | 7.76780795353075  | 12.70824465728874 | 10.74979397006801 |
| C | 7.86232177832197  | 7.98609090335791  | 10.59448505951059 |
| H | 8.76150523292592  | 8.52988573801833  | 10.23666376463270 |
| H | 7.00495675450186  | 8.68805715195714  | 10.58339009362621 |
| H | 7.65262747041415  | 7.18523071262243  | 9.85792520622391  |
| C | 2.91645393901832  | 7.21106947236450  | 13.07614888870768 |
| C | 3.76825176853923  | 10.23050009637327 | 16.30183723864760 |
| H | 4.08885189534700  | 9.22944255135485  | 16.62688403165037 |
| C | 7.91674581277375  | 8.61743389311365  | 17.60005037763107 |
| H | 8.04339172601555  | 7.58077906568954  | 17.23077235265674 |
| H | 7.38563228681610  | 8.57223555407261  | 18.57299327175388 |
| H | 8.92815142828234  | 9.03715367205110  | 17.77968790852760 |
| C | 0.05296856490605  | 12.89718021170300 | 10.45911326743745 |
| H | -0.86242841166151 | 12.96272193313736 | 9.85232601152010  |
| B | 4.84929666129270  | 10.98099182404729 | 12.10825969413009 |
| C | 2.95428159663899  | 7.02384110235333  | 11.66319435285481 |
| C | 0.07732088835220  | 12.08985816003139 | 11.61184724940005 |
| H | -0.81615015189856 | 11.52002328900601 | 11.90690111818357 |
| C | 1.24041947231719  | 12.00435102733005 | 12.38829952798799 |
| H | 1.26765974996610  | 11.35222716872938 | 13.27407019043095 |
| C | 1.81651638509003  | 7.34822189222565  | 10.90420922468588 |
| H | 1.83332793248258  | 7.16598964708973  | 9.81883128451362  |

|   |                   |                   |                   |
|---|-------------------|-------------------|-------------------|
| C | 10.10460152746003 | 12.90857201362591 | 13.52741916320007 |
| H | 10.89331915836751 | 13.65127902792881 | 13.28987531498203 |
| H | 9.68928524949871  | 13.16936702388854 | 14.52324753615559 |
| H | 9.29085527173476  | 13.02479484942314 | 12.78327783355699 |
| C | 3.95988069196451  | 4.87641026180086  | 10.82560652432330 |
| H | 3.09065487081546  | 4.66235770512138  | 10.16952944618800 |
| H | 3.76630358967722  | 4.39684341646295  | 11.80488903812679 |
| H | 4.85496580383060  | 4.39616595347979  | 10.37949880543181 |
| C | 0.65594538626697  | 7.88604368397492  | 11.48851399916644 |
| C | 1.74656275919982  | 7.73071112272074  | 13.69180343515236 |
| C | 0.64942186865548  | 8.07634440442842  | 12.87973524552968 |
| H | -0.25974015277424 | 8.48200563798906  | 13.34918438655434 |
| C | 1.63512528523092  | 7.83629586563819  | 15.20700600805726 |
| H | 2.66449145325496  | 7.96392080116557  | 15.59984309915090 |
| C | 0.79423378866151  | 9.03267796087317  | 15.67588845134524 |
| H | 1.13832971860442  | 9.98050674517114  | 15.21618489369815 |
| H | 0.86700035643126  | 9.14986993238118  | 16.77490104733580 |
| H | -0.28054700322571 | 8.89930687634671  | 15.43556814235336 |
| C | 1.08370622534122  | 6.51879920148781  | 15.79075536998518 |
| H | 0.06289760329950  | 6.31667387131785  | 15.40553610457291 |
| H | 1.02927238944926  | 6.57053808811650  | 16.89758537609067 |
| H | 1.72217046653549  | 5.6555385303894   | 15.52045104633912 |
| C | -0.58965123495112 | 8.17823209372935  | 10.66172935047009 |
| C | -0.30455306799139 | 9.05663055074050  | 9.43231410525139  |
| H | 0.15906565854398  | 10.01955852146043 | 9.72367241476110  |
| H | 0.37284855832294  | 8.54654545390297  | 8.71568888465071  |
| H | -1.24285803554056 | 9.28233010786976  | 8.88591778844343  |
| C | -1.28667480654135 | 6.86292880855682  | 10.25992809532756 |
| H | -0.63380534253022 | 6.25598394439900  | 9.59837904215280  |
| H | -1.52580115362479 | 6.24753879302187  | 11.14983908595170 |
| H | -2.23087878707117 | 7.06357434109430  | 9.71326005182157  |
| H | -1.28728530146451 | 8.74013218521307  | 11.32171827846039 |

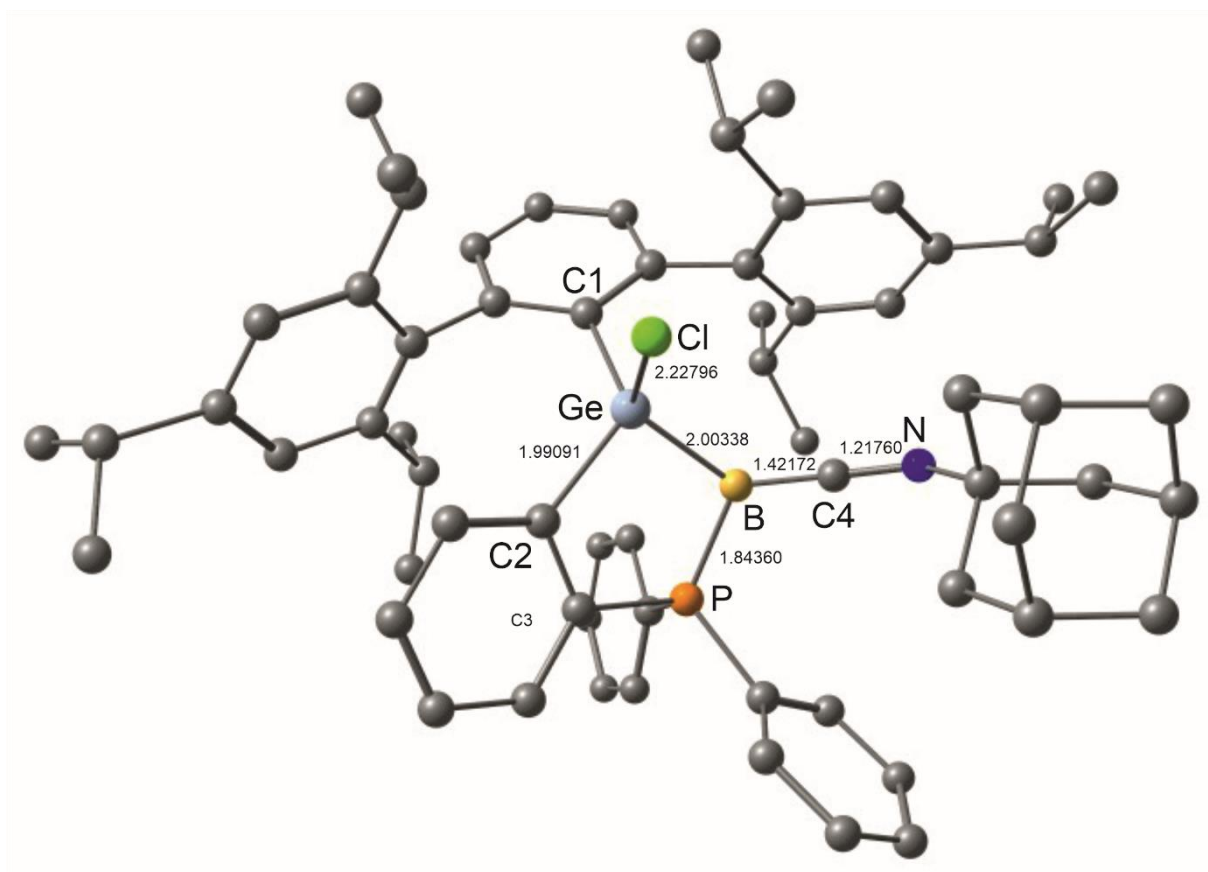Figure S166. Optimized structure of compound **3**.Coordinates of compound **3**.

148

Coordinates from ORCA-job bp86optfreq\_hnumac

|    |                   |                   |                   |
|----|-------------------|-------------------|-------------------|
| Cl | 11.28815623112800 | 15.64567799688683 | 10.12326257241064 |
| P  | 11.29240499594519 | 13.40514472572996 | 14.31024992484482 |
| N  | 14.82176660808500 | 13.79553546930149 | 12.67378797777196 |
| C  | 10.37743650192260 | 12.37486147950015 | 10.05740732405916 |
| B  | 12.22040929858400 | 13.35333543659121 | 12.71808712397143 |
| C  | 11.42075099410796 | 11.55518844257550 | 9.53685496838258  |
| C  | 11.08764753950178 | 10.42467232142005 | 8.75955318986702  |
| H  | 11.90399268619874 | 9.81368708285945  | 8.34678601114629  |
| C  | 9.75490461908366  | 10.09486227517327 | 8.48787028030159  |
| H  | 9.51413728537688  | 9.20919301277230  | 7.88021972625028  |
| C  | 8.73394364124933  | 10.92471356685001 | 8.96449399785388  |
| H  | 7.68209990411021  | 10.71138497617084 | 8.72090160594932  |
| C  | 9.02936287949222  | 12.06829928199872 | 9.73890383919072  |
| C  | 12.88323243042096 | 11.85789405404958 | 9.69054290873481  |
| C  | 13.49053101872653 | 12.81469104859633 | 8.83291235323245  |
| C  | 14.88654067970443 | 13.00111570214418 | 8.90267613561528  |
| H  | 15.34840935458172 | 13.73841579922338 | 8.23345408434736  |
| C  | 15.69465744674418 | 12.26635817131688 | 9.78217999832648  |
| C  | 15.06875452788181 | 11.32598299570257 | 10.61987081068454 |
| H  | 15.68657327552863 | 10.76097067473591 | 11.33460508402787 |

|    |                   |                   |                   |
|----|-------------------|-------------------|-------------------|
| C  | 17.74639741610493 | 13.66569871585188 | 9.12123081248654  |
| H  | 17.59166963403315 | 13.58821429887291 | 8.02474033411807  |
| H  | 18.8360755526086  | 13.77680353615773 | 9.29362081857875  |
| H  | 17.25295336285297 | 14.59623989093997 | 9.46579580723068  |
| C  | 17.20959146047149 | 12.43004250014867 | 9.85356232177479  |
| H  | 17.45591453497835 | 12.54348470266921 | 10.93462649763373 |
| C  | 13.62704127706174 | 10.03293722550315 | 12.91966497156614 |
| H  | 14.69917350560015 | 9.75060173311179  | 12.95391114167252 |
| H  | 13.07493746233745 | 9.30771256234197  | 13.55131726701075 |
| H  | 13.52115170583284 | 11.04069340179413 | 13.36533238844350 |
| C  | 13.27420898315875 | 8.61945826708026  | 10.85783572430880 |
| H  | 12.82364814511200 | 8.55184575533377  | 9.84917524209863  |
| H  | 12.81081785752492 | 7.83558847919058  | 11.49304805325313 |
| H  | 14.35441144065570 | 8.38369704623977  | 10.75905218670485 |
| C  | 6.29187033759225  | 14.66389282443633 | 9.39549276587815  |
| H  | 5.99095119146149  | 15.45467498580536 | 8.69011438726106  |
| C  | 7.50565504621461  | 13.97943320344897 | 9.18616323896523  |
| C  | 7.86273683234952  | 12.94092551156661 | 10.08606071597975 |
| C  | 12.68385002757335 | 13.54880945442809 | 7.76205055634465  |
| H  | 11.66201877187056 | 13.70456637695924 | 8.16370975220286  |
| C  | 13.08181128911989 | 10.01666032025424 | 11.48217501831338 |
| H  | 11.98968195269633 | 10.21369424243965 | 11.52791771344490 |
| C  | 13.68546730277706 | 11.09997959533960 | 10.59102929755662 |
| C  | 4.09427488689844  | 16.00666514472712 | 11.85476154281798 |
| H  | 4.87951221447849  | 16.78455863009491 | 11.76866467589323 |
| H  | 4.27878658131321  | 15.44046897482845 | 12.79154669444046 |
| H  | 3.11590601283317  | 16.52078604551824 | 11.95655112100337 |
| C  | 2.93041778864873  | 14.07694952630728 | 10.67893863816326 |
| H  | 1.95817149559053  | 14.61097513829165 | 10.71298913649060 |
| H  | 2.98711402934778  | 13.43065946472058 | 11.57959628964976 |
| H  | 2.93054989258158  | 13.41379039663199 | 9.79065273146163  |
| C  | 8.38482711536148  | 14.31966219910696 | 7.98464700054559  |
| H  | 9.40111118220500  | 13.93298094253287 | 8.20336913171506  |
| C  | 7.88144158218586  | 13.60032964798807 | 6.71833851293944  |
| H  | 8.54107981714405  | 13.81896994516706 | 5.85302483333089  |
| H  | 6.85321632885844  | 13.92959822946367 | 6.45846276846957  |
| H  | 7.86022725325466  | 12.50203342705246 | 6.86167510689307  |
| Ge | 10.86401920130892 | 13.81310176653331 | 11.31724636752192 |
| C  | 8.52380724609550  | 15.83219732451769 | 7.75341570962608  |
| H  | 9.25652556346628  | 16.02707520739420 | 6.94389641059556  |
| H  | 8.89152371217796  | 16.34198916863819 | 8.66530784256392  |
| H  | 7.56439159523260  | 16.29924846019957 | 7.44721230814438  |
| C  | 9.49137154686371  | 14.53752725185425 | 12.56415714949472 |
| C  | 8.38438023988243  | 15.33713148806675 | 12.23164478299999 |
| H  | 8.13884471034170  | 15.51997124300298 | 11.17619431261787 |
| C  | 7.58803772101306  | 15.90956056927400 | 13.23675947863617 |
| H  | 6.73181468202901  | 16.53868816196984 | 12.95564692488441 |

C 7.86528244973337 15.67034284348786 14.59416485840724  
H 7.22589940315747 16.10712686721013 15.37636630646150  
C 8.96574464344551 14.87651636183352 14.95006236431755  
H 9.19273470448650 14.68527724986257 16.00988477708120  
C 9.78801419293415 14.34524457058856 13.93662411068459  
C 10.66987758089893 11.80966209965015 14.93900502695864  
C 10.26414372553622 11.62515306399573 16.27620247742239  
H 10.40363761965953 12.43259183092393 17.01112591061743  
C 9.68982946381495 10.40585189640056 16.66801657919433  
H 9.37524414400603 10.25967061158647 17.71267552911439  
C 9.51666827706319 9.37216057454793 15.72957700373863  
H 9.06620429798732 8.41754229009697 16.04150815067944  
C 9.92214364710040 9.55617607288056 14.39633261624906  
H 9.79322072095978 8.74964484605304 13.65901487773280  
C 10.49784391402547 10.77280592501899 14.00298231194171  
H 10.82812958595273 10.93339806292715 12.96494899276239  
C 12.19230711706551 14.17843824276108 15.67248551642244  
C 13.18055797167639 13.41797940102599 16.33536229625561  
H 13.28456160516944 12.34423491931791 16.11730235608629  
C 14.03600547842602 14.03573430738225 17.26017226320972  
H 14.81035738656342 13.44140097463783 17.76840945876321  
C 13.90625003966208 15.40823174898163 17.53404644022450  
H 14.57805156602603 15.89061362152511 18.26009919682878  
C 13.24664731525480 14.93308586628928 7.40832447252716  
H 14.20075813741792 14.86080718175632 6.84499421386321  
H 13.41907056520022 15.54107266342812 8.31676027443311  
H 12.52925325814430 15.48104814418189 6.76426679409217  
C 12.92210339946797 16.16609800904137 16.87484685450399  
H 12.82314577130919 17.24235107522761 17.08198537263652  
C 12.07241885946481 15.55831102425705 15.93940163246173  
H 11.32391650570580 16.15702631411206 15.40027772183999  
C 13.62425975595819 13.57776304708527 12.70695408108658  
C 15.38684266585667 15.16886773650559 12.68059244092474  
C 16.90816335169148 15.10143224926036 12.89347611819903  
H 17.36194098788780 14.47459789740084 12.09790286650261  
H 17.12062808265754 14.60351798277141 13.86354791288886  
C 17.49601040796496 16.52834398619656 12.87021249397199  
H 18.59526117052328 16.47517970918659 13.02322875326479  
C 7.05523703765122 12.66210786532852 11.22101316193947  
C 12.55604272976377 12.68017234505923 6.49365581250780  
H 11.95442910033328 13.20244535455520 5.72044396630553  
H 12.06354175360415 11.71253183570210 6.70964897886134  
H 13.55696610970753 12.46548414564909 6.06369335959989  
C 16.85424067684555 17.36647463274227 13.99712963795818  
H 17.28798429992342 18.39004807438968 14.00551486162539  
H 17.07862000505514 16.91052387713655 14.98601522954231  
C 15.32734499165656 17.43657456878830 13.78338132485903

|   |                   |                   |                   |
|---|-------------------|-------------------|-------------------|
| H | 14.86112018330464 | 18.03079327782537 | 14.59901794109302 |
| C | 14.74555536355808 | 16.01061185970971 | 13.80199911600566 |
| H | 14.92889679170263 | 15.52106778862150 | 14.78125196323301 |
| H | 13.64733251566842 | 16.02951005700575 | 13.64489465549301 |
| C | 15.07623256948061 | 15.83110601927386 | 11.31971198213232 |
| H | 13.97634453408718 | 15.85219123355191 | 11.17165399998644 |
| H | 15.49443971822329 | 15.20583872909631 | 10.50559001402885 |
| C | 15.02382176961252 | 18.09183709416904 | 12.41915800561584 |
| H | 15.41798151799400 | 19.13112221414698 | 12.39719455312934 |
| H | 13.92552908213562 | 18.15449359728322 | 12.26305251600889 |
| C | 15.66551574609093 | 17.25463579882811 | 11.29234807570931 |
| H | 15.44410635775849 | 17.71963654679691 | 10.30790304669805 |
| C | 17.19248297340096 | 17.18468610902830 | 11.50622130649655 |
| H | 17.66548099769606 | 16.59819243744842 | 10.68926535103481 |
| H | 17.63238503579790 | 18.20489597234394 | 11.46762737652247 |
| C | 7.09557012960500  | 11.98783764574651 | 13.68723683947355 |
| H | 7.37126213981471  | 13.02870071450310 | 13.93661178238151 |
| H | 7.60653835386223  | 11.31626845149133 | 14.40580292027873 |
| H | 6.00342806556643  | 11.87358734623433 | 13.85097600342335 |
| C | 7.49484207426452  | 11.62309242211352 | 12.24973829567727 |
| H | 8.60519839121249  | 11.59465278054863 | 12.21272818770327 |
| C | 6.98823947582193  | 10.21142652905341 | 11.89678012830603 |
| H | 5.87855716986203  | 10.19178466156704 | 11.86854306278348 |
| H | 7.32324698029134  | 9.47852281442695  | 12.66000160023988 |
| H | 7.36186786936586  | 9.87463506998288  | 10.91119472286146 |
| C | 4.10382213949163  | 15.07306906350973 | 10.63038120313147 |
| H | 3.96892512757225  | 15.70700355486027 | 9.72631439896101  |
| C | 5.85594224717877  | 13.37462949713689 | 11.38750310858940 |
| H | 5.22812801315384  | 13.15928960723413 | 12.26494538937379 |
| C | 5.43947195510357  | 14.35691162254362 | 10.46883011844569 |
| C | 17.91684179183518 | 11.15541664991705 | 9.34761038279477  |
| H | 17.69889736679020 | 10.99385434793749 | 8.27098030721958  |
| H | 17.57694869115326 | 10.25404274904444 | 9.89514964305256  |
| H | 19.01754397701253 | 11.23494427086722 | 9.46749084386233  |

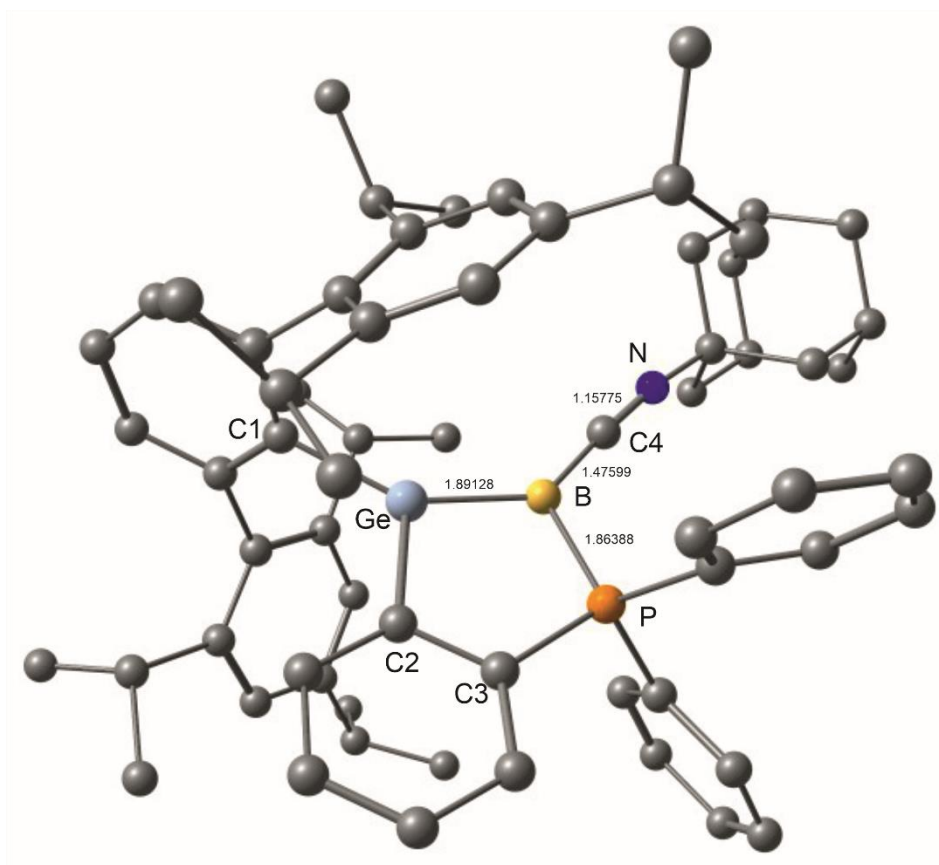Figure SI67. Optimized structure of compound **4**.Coordinates of compound **4**.

147

Coordinates from ORCA-job wB97X

|    |                  |                   |                  |
|----|------------------|-------------------|------------------|
| P  | 6.75829247497397 | 4.51672478647336  | 3.96116488771189 |
| N  | 4.15795408552511 | 4.16094640130417  | 6.78675009215106 |
| C  | 6.47609144315289 | 9.02244762795816  | 5.86682985456499 |
| C  | 7.44804410833268 | 9.54431995872885  | 6.73323067870845 |
| C  | 7.34503761482506 | 10.89119441316666 | 7.09903385766034 |
| H  | 8.07290941133848 | 11.31591415120792 | 7.79381051172127 |
| C  | 6.31353395404589 | 11.68605553082897 | 6.60227775069044 |
| H  | 6.25640348318286 | 12.73765788542597 | 6.89290879321638 |
| C  | 5.32995123629647 | 11.14231793919378 | 5.77612274306094 |
| H  | 4.49282868223014 | 11.75854960947760 | 5.43908048652660 |
| C  | 5.38926913393100 | 9.79389972102438  | 5.42115971415278 |
| C  | 4.29564571222537 | 9.03993447347602  | 4.72383110340205 |
| C  | 3.30160093579143 | 8.44522739434899  | 5.53414277273639 |
| C  | 2.43229338888700 | 7.52270555923495  | 4.95500697117607 |
| H  | 1.67345173390530 | 7.04563350912635  | 5.58127469968643 |
| C  | 2.51341326653895 | 7.17461791508158  | 3.60508763502384 |
| C  | 3.45224908298679 | 7.83186200779641  | 2.81128639203831 |
| H  | 3.48916712625376 | 7.59416291499830  | 1.74532477364078 |
| Ge | 6.61284403682527 | 7.21644860686775  | 5.20232572171708 |
| C  | 4.34858349797975 | 8.76741220102707  | 3.34039416819336 |



|   |                   |                   |                  |
|---|-------------------|-------------------|------------------|
| C | 5.31099800302612  | 9.52932679852089  | 2.43708100489405 |
| H | 6.21939467271196  | 9.73760517823946  | 3.02652148889680 |
| C | 5.74134736234009  | 8.76107600355022  | 1.18731496373043 |
| H | 4.91083322008770  | 8.62855717560887  | 0.47651941324716 |
| H | 6.14457527372154  | 7.76801263607924  | 1.43715398764194 |
| H | 6.53330292999122  | 9.31170042708440  | 0.65830175808774 |
| C | 4.69926690909905  | 10.88419470941480 | 2.05543770897515 |
| H | 5.39210192024062  | 11.46663816991192 | 1.42904466687920 |
| H | 4.46288425800236  | 11.48454506390256 | 2.94546137410286 |
| H | 3.76473778257466  | 10.74240861241312 | 1.49022495739275 |
| C | 1.60080672188524  | 6.10887724775440  | 3.02509294326579 |
| H | 1.88937908854270  | 5.98005786210517  | 1.96788417844349 |
| C | 0.13055750816903  | 6.53648182288708  | 3.05983293229529 |
| H | -0.50874454223304 | 5.78235333569237  | 2.57576794636001 |
| H | -0.01822603738673 | 7.49393132039170  | 2.53948892624575 |
| H | -0.22669958360856 | 6.66022468008101  | 4.09480612189225 |
| C | 1.81691444701267  | 4.76292449493645  | 3.72438019009881 |
| H | 1.23208200204732  | 3.96648613594288  | 3.23901780055376 |
| H | 1.50446082964493  | 4.80865145686535  | 4.78052498967899 |
| H | 2.87789509445764  | 4.47105768715638  | 3.70135498369321 |
| C | 3.14380730976422  | 8.81599163673135  | 7.00511589680578 |
| H | 4.08641460276705  | 9.27019265242851  | 7.34493445637997 |
| C | 2.04582498727826  | 9.87468411989308  | 7.16592909177198 |
| H | 2.26847012154293  | 10.77429646058628 | 6.57355623293564 |
| H | 1.94297170168191  | 10.17800874172218 | 8.21911070187701 |
| H | 1.07271764112137  | 9.48635959215977  | 6.82502370921704 |
| B | 5.95709742844919  | 5.44966673721818  | 5.36179459796221 |
| C | 2.88665333448884  | 7.61080533983641  | 7.90911806478106 |
| H | 1.89947152840486  | 7.15791911361095  | 7.72843670232859 |
| H | 2.91432377447157  | 7.91336166063184  | 8.96721657969644 |
| H | 3.64952199011712  | 6.83166204026667  | 7.75861721108631 |
| C | 8.49742569162531  | 8.62771712403381  | 7.29084932299008 |
| C | 8.11670129328165  | 7.64580116640216  | 8.24317471103380 |
| C | 9.08688737466126  | 6.76529468416485  | 8.72099326269804 |
| H | 8.80013143317736  | 6.01242259214835  | 9.45770673046102 |
| C | 10.41799529354744 | 6.82430778395539  | 8.30294222852164 |
| C | 10.77006811968382 | 7.80630741375958  | 7.38236768754160 |
| H | 11.81159397303322 | 7.86447175716558  | 7.05512043262183 |
| C | 9.83980528714956  | 8.71363989710238  | 6.86495282394872 |
| C | 10.31842989437353 | 9.78635889691481  | 5.89438143939740 |
| H | 9.43445400102087  | 10.16349886352328 | 5.35393465119840 |
| C | 10.93155663080933 | 10.96950183927424 | 6.65579550342793 |
| H | 11.24014671022837 | 11.76433595589821 | 5.95976157675399 |
| H | 11.82077200206830 | 10.64955171786457 | 7.22159274104899 |
| H | 10.22494922851729 | 11.40574451339844 | 7.37535743731603 |
| C | 11.31118667114689 | 9.25454957221006  | 4.85471837138861 |
| H | 10.95536910661246 | 8.32596566497546  | 4.38545082881213 |

|   |                   |                   |                   |
|---|-------------------|-------------------|-------------------|
| H | 12.29652556602673 | 9.04818653731051  | 5.30010750270050  |
| H | 11.47179258146813 | 10.00282250630495 | 4.06312177795601  |
| C | 11.44777613093778 | 5.83368204600264  | 8.81694090261782  |
| H | 12.42731419412288 | 6.16632801191413  | 8.43389617379851  |
| C | 11.53004883787577 | 5.81534550729673  | 10.34596208925621 |
| H | 12.34991189683943 | 5.16257835470565  | 10.68214481700616 |
| H | 10.60081035350250 | 5.43213440179984  | 10.79754386010613 |
| H | 11.70932560437234 | 6.82261316123574  | 10.74999758607439 |
| C | 11.17934175342517 | 4.43489509759354  | 8.25117076892315  |
| H | 11.14280469519302 | 4.44860646094027  | 7.15113869333444  |
| H | 10.21329854101513 | 4.04790764925102  | 8.61652428937775  |
| H | 11.96213280191313 | 3.72467732031705  | 8.55959891268247  |
| C | 6.70348642668559  | 7.59130703412897  | 8.82192570054839  |
| H | 5.99758075825027  | 7.86346081388102  | 8.02239838641499  |
| C | 6.53902653539727  | 8.63886774559023  | 9.93067493611392  |
| H | 6.74933415908998  | 9.65294917555934  | 9.56143007568796  |
| H | 7.22761392408372  | 8.43467592837539  | 10.76551110236960 |
| H | 5.51108722572668  | 8.63012510534442  | 10.32544838636537 |
| C | 6.29109208634620  | 6.20527019518242  | 9.32030470704133  |
| H | 6.45918445907407  | 5.43249233256430  | 8.55350842875981  |
| H | 5.22076552313886  | 6.20616273596198  | 9.57833230669245  |
| H | 6.83715244936135  | 5.90877613635970  | 10.22917389400009 |
| C | 7.79689596060178  | 7.03784322317034  | 3.66977739871830  |
| C | 7.79525841370860  | 5.74450207922200  | 3.11889293843229  |
| C | 8.55211890235358  | 5.44566029452218  | 1.98639243666547  |
| H | 8.54815985531670  | 4.43999159167757  | 1.55830131419010  |
| C | 9.31571173486298  | 6.44990253371711  | 1.38988376316954  |
| H | 9.90708700815104  | 6.22478417047196  | 0.49976696063921  |
| C | 9.32508227769281  | 7.73570423194779  | 1.92876834608988  |
| H | 9.92552811447951  | 8.51819127652709  | 1.45878453576446  |
| C | 8.56905496051893  | 8.02924008246870  | 3.06509013893557  |
| H | 8.57764193289484  | 9.04206043948551  | 3.47716973892431  |
| C | 7.82475611876889  | 3.13747906554937  | 4.44567498510886  |
| C | 8.20207027189726  | 2.14313668521441  | 3.53179270582694  |
| H | 7.80649964078857  | 2.14858870119894  | 2.51273761112611  |
| C | 9.07462381606700  | 1.13205768198174  | 3.92323621320575  |
| H | 9.36704896367828  | 0.36028137792301  | 3.20782483507272  |
| C | 9.57100809155936  | 1.10386081695553  | 5.22703084388259  |
| H | 10.25364685576805 | 0.30757475054899  | 5.53288313448690  |
| C | 9.19787162471614  | 2.08943264674209  | 6.13870924374157  |
| H | 9.58806922486278  | 2.06860706338409  | 7.15831969958488  |
| C | 8.32937227065576  | 3.10796677770911  | 5.75086387899215  |
| H | 8.04572607432531  | 3.89262976530597  | 6.45836515189232  |
| C | 5.57796488745198  | 3.86104279230947  | 2.75666018329373  |
| C | 5.15478530441579  | 4.66277617448918  | 1.69026599759746  |
| H | 5.59608691200258  | 5.64982304727276  | 1.53834402370789  |
| C | 4.16792035137988  | 4.20514888102045  | 0.82138091980315  |

|   |                  |                   |                   |
|---|------------------|-------------------|-------------------|
| H | 3.85142262228967 | 4.83253468464421  | -0.01511602910572 |
| C | 3.59141740286319 | 2.95044061552957  | 1.01594960345115  |
| H | 2.82055921397126 | 2.59210034872269  | 0.32991854198828  |
| C | 4.00061868115677 | 2.15261771264710  | 2.08400169176524  |
| H | 3.54921411256061 | 1.16996707273586  | 2.23797720219475  |
| C | 4.98940448216326 | 2.60505082203461  | 2.95506682193812  |
| H | 5.30799293560825 | 1.97058941947060  | 3.78663728283742  |
| C | 4.94430668213609 | 4.76351051944753  | 6.18762730079111  |
| C | 3.35999390322946 | 3.28908797325792  | 7.59995662546212  |
| C | 2.07863473988820 | 4.01785459011193  | 8.03578357834569  |
| H | 1.52754450365571 | 4.35375047780532  | 7.14255615649076  |
| H | 2.34685469961158 | 4.91460075591715  | 8.61491612430134  |
| C | 1.22519779856386 | 3.06475253725930  | 8.88386202566557  |
| H | 0.30948061988084 | 3.59238504502333  | 9.19318598297535  |
| C | 2.02396298320759 | 2.63816178756643  | 10.12475589263979 |
| H | 2.27498169129290 | 3.51970709431500  | 10.73837175631848 |
| H | 1.41147045483803 | 1.97653456426092  | 10.75818874552315 |
| C | 3.30477329515422 | 1.91154183780653  | 9.68762172305704  |
| H | 3.88310232871392 | 1.60809834712513  | 10.57437610121774 |
| C | 4.16506730387866 | 2.86080169693227  | 8.83988930556799  |
| H | 4.44837488568388 | 3.75467137671808  | 9.41794231026417  |
| H | 5.09765252463055 | 2.36826517318385  | 8.51868526163609  |
| C | 2.99685141827832 | 2.05019748582922  | 6.76029287858968  |
| H | 3.92352000218783 | 1.55042369927081  | 6.43298916698264  |
| H | 2.45565991266506 | 2.36775578174354  | 5.85425084485175  |
| C | 2.14035153718995 | 1.10372138247109  | 7.61493365034077  |
| H | 1.88267263683987 | 0.21933063646064  | 7.01125627293846  |
| C | 2.93723319130073 | 0.67325928091460  | 8.85604996111325  |
| H | 3.84829564225913 | 0.12858735029772  | 8.55691954711474  |
| H | 2.33804228432664 | -0.02334260689024 | 9.46425322067699  |
| C | 0.85793600615785 | 1.82856154885234  | 8.05026208110283  |
| H | 0.22367108132644 | 1.14962257603384  | 8.64266165036775  |
| H | 0.26677094914325 | 2.12469104090042  | 7.16752248575499  |

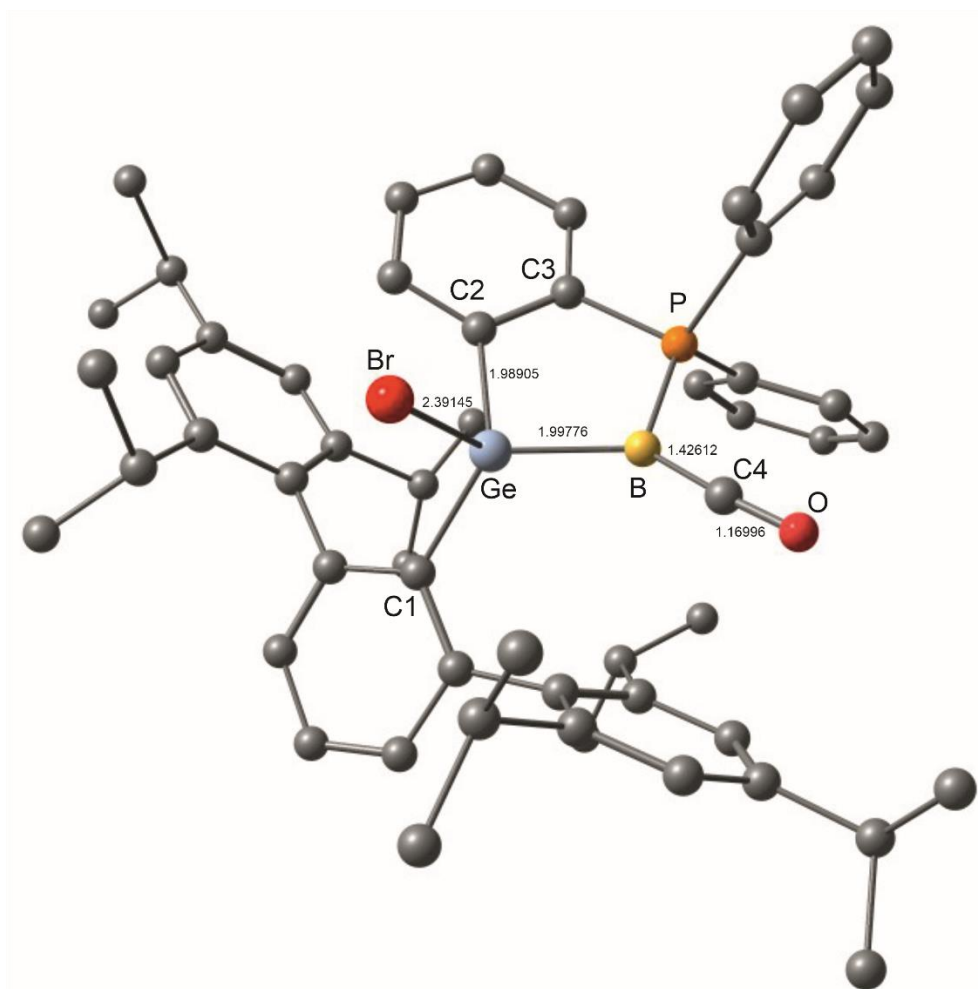

Figure SI68. Optimized structure of compound 5.

### Coordinates of compound 5.

123

Coordinates from ORCA-job bp86optfreq\_hnumac

|    |                   |                   |                   |
|----|-------------------|-------------------|-------------------|
| Ge | 8.39011966193191  | 11.31978555611721 | 4.08195161213207  |
| Br | 10.71315194668353 | 11.88073443883334 | 4.17073454003249  |
| P  | 6.66077110373234  | 11.44925625909456 | 6.63185581765842  |
| O  | 6.90578663975409  | 15.03651769950891 | 5.54208071940677  |
| C  | 7.66065569838049  | 12.34691877185781 | 0.01868547613992  |
| H  | 7.31063385986888  | 13.25508542859548 | -0.49483047499824 |
| C  | 8.04578774001800  | 11.22072566277264 | -0.71543621692838 |
| H  | 8.01995458561290  | 11.23586421430715 | -1.81565990764192 |
| C  | 7.14398900878035  | 13.59399099933947 | 2.06568090247956  |
| C  | 5.76160823051695  | 13.65098093303293 | 2.39739368782927  |
| C  | 7.33779354360809  | 15.98411982192724 | 2.47131613744026  |
| H  | 7.96123593855260  | 16.89034645463711 | 2.51957524706281  |
| C  | 5.20022295435149  | 14.89766445091136 | 2.72198219443992  |
| H  | 4.13013850322031  | 14.95904352894405 | 2.97347323607380  |
| C  | 7.19018099734913  | 11.97124226489244 | 8.29661775399750  |
| C  | 8.42906549688755  | 10.06281359857806 | -0.03109034445012 |
| H  | 8.68109076492396  | 9.14618945814166  | -0.58500755824998 |

|   |                   |                   |                   |
|---|-------------------|-------------------|-------------------|
| C | 3.82368062241616  | 12.37762598875943 | 3.46514701661129  |
| H | 4.26858249303264  | 12.59327731190332 | 4.45501080742943  |
| H | 3.33755860171131  | 11.38262438353505 | 3.51947250847521  |
| H | 3.02293194110031  | 13.12192785600647 | 3.27490047240777  |
| C | 4.89793794296462  | 12.39158572179344 | 2.36927492807889  |
| H | 5.57573455987821  | 11.53456565127281 | 2.56864824372615  |
| C | 9.44606636474628  | 14.70199590201483 | 1.86335647823151  |
| H | 9.73758394577201  | 13.63137279189562 | 1.83324174291585  |
| C | 4.27247416697443  | 12.17126277280583 | 0.97797955033343  |
| H | 3.60450852469195  | 13.01746155070498 | 0.71277911748023  |
| H | 3.66910709856590  | 11.23958911778131 | 0.96063332438235  |
| H | 5.04766734610787  | 12.08953958289049 | 0.19163833522669  |
| C | 5.96231455983141  | 16.07973247909202 | 2.73834899196579  |
| C | 7.94771707957078  | 14.75842774156193 | 2.14416027678029  |
| C | 9.78388936981659  | 15.31668815430002 | 0.49241301140898  |
| H | 9.25198532508958  | 14.79290420531261 | -0.32677236567388 |
| H | 10.87298831314696 | 15.25256649283151 | 0.28818977918939  |
| H | 9.49230530838914  | 16.38745799333828 | 0.45265661701354  |
| C | 9.48582288848344  | 6.07360675287937  | 2.80606817020607  |
| C | 7.68584398208103  | 12.34584762091960 | 1.43164347813356  |
| C | 8.13506633057939  | 11.18950700978084 | 2.12490895094920  |
| C | 5.30593281166955  | 17.42217605211171 | 3.03302610404703  |
| H | 4.25377659392762  | 17.20764839354798 | 3.32459217379376  |
| C | 5.97415603786109  | 18.15977277984456 | 4.20671548919354  |
| H | 5.98994612742592  | 17.53129000654338 | 5.11798853506929  |
| H | 5.43542355687129  | 19.10253639724952 | 4.43674862018129  |
| H | 7.02439498806790  | 18.42854518988629 | 3.96821853844466  |
| C | 10.26124644672891 | 15.35781612745387 | 2.99085303308566  |
| H | 10.08131649224249 | 16.45177352990324 | 3.04796350215285  |
| H | 11.34685784803044 | 15.20474838545024 | 2.82284401381288  |
| H | 10.00786368246167 | 14.91313723674532 | 3.97317492786955  |
| C | 8.16999639825123  | 6.56274829662345  | 2.89055201407438  |
| H | 7.39242140508673  | 5.89930218365843  | 3.29758569221560  |
| C | 8.48466101621379  | 10.03241707643107 | 1.37980549213297  |
| C | 10.48451546192874 | 6.94134675988407  | 2.33413315716018  |
| H | 11.52668096364148 | 6.59108870533792  | 2.28715961464432  |
| C | 4.86418349432771  | 11.22441016737384 | 6.76675053477529  |
| C | 5.26881597581865  | 18.30013891783667 | 1.76660243633459  |
| H | 6.29674670533428  | 18.54367823589579 | 1.42483548272385  |
| H | 4.74095036364046  | 19.25769840409934 | 1.95901964325498  |
| H | 4.75397157210783  | 17.78156053814825 | 0.93270175249158  |
| C | 9.79754522194104  | 4.63453245058010  | 3.19636060364821  |
| H | 8.92949596268063  | 4.26865197560014  | 3.78876285370406  |
| C | 11.32353756467093 | 9.16392897431876  | 1.44129162682868  |
| H | 10.92448399098710 | 10.19917488027993 | 1.41793816710580  |
| C | 11.77174909720117 | 8.79194461497598  | 0.01497586709559  |
| H | 12.16107487630622 | 7.75246384067076  | -0.01996588122791 |

|   |                   |                   |                   |
|---|-------------------|-------------------|-------------------|
| H | 12.57956901448667 | 9.46907430238991  | -0.33194170380826 |
| H | 10.93591219967237 | 8.86181097298204  | -0.70825975256951 |
| C | 8.42506119209134  | 12.64396782850145 | 8.39822848971465  |
| H | 8.98606507646393  | 12.87320411321530 | 7.47802311666841  |
| C | 8.32711020440276  | 9.71929140506368  | 5.26125512292769  |
| C | 10.19403983524726 | 8.25702568442784  | 1.92353902887418  |
| C | 7.82857742161123  | 7.86846618392887  | 2.49914999980973  |
| C | 6.45124000018439  | 11.66993511350512 | 9.45902408115268  |
| H | 5.48441369958662  | 11.15086915112275 | 9.37859947886510  |
| C | 6.39093526796169  | 8.36835025482032  | 2.63336353537940  |
| H | 6.44551071080375  | 9.44787509068513  | 2.89207617755888  |
| C | 4.07585650846833  | 12.31655613805131 | 7.19228603865391  |
| H | 4.55930106803257  | 13.24639173894228 | 7.53012212926522  |
| C | 7.30076788595615  | 8.80277185890436  | 7.30675454688112  |
| H | 6.61162140030562  | 8.91767162392025  | 8.15739788804290  |
| C | 2.67781322131689  | 12.22242680270170 | 7.17066451272927  |
| H | 2.06782235267273  | 13.07762801325447 | 7.49888402140834  |
| C | 7.44025769285020  | 9.83671611687659  | 6.35928489560840  |
| C | 8.85039840965934  | 8.71252618279805  | 1.98152802316405  |
| C | 8.91790042894996  | 13.01119778040004 | 9.65889810733386  |
| H | 9.88179825868507  | 13.53654264847917 | 9.73643469666520  |
| C | 12.51948681528867 | 9.16095078082351  | 2.40957148812826  |
| H | 12.19979949887388 | 9.41770839867497  | 3.43838003408379  |
| H | 13.26973348376779 | 9.91443036740478  | 2.09396952583862  |
| H | 13.03094947826048 | 8.17584919755838  | 2.43421318483146  |
| C | 5.60988985887022  | 7.67887816966957  | 3.76023047737193  |
| H | 5.39448463528664  | 6.61541403253293  | 3.52683658502287  |
| H | 4.63222270853720  | 8.18199727241650  | 3.90144217112110  |
| H | 6.16561252198427  | 7.71207138245331  | 4.71904288492692  |
| C | 11.05175434541986 | 4.50661277444986  | 4.07685830710641  |
| H | 11.19018735452641 | 3.45922886423383  | 4.41494804322750  |
| H | 10.98609836662484 | 5.15204570798699  | 4.97627061717698  |
| H | 11.96992631015765 | 4.79710563645050  | 3.52560699420567  |
| C | 5.63175450544418  | 8.26711162857496  | 1.29592526651094  |
| H | 6.14057554550596  | 8.84048388870915  | 0.49749390773071  |
| H | 4.60217181793238  | 8.66804001661244  | 1.39904470731303  |
| H | 5.55977402853181  | 7.20925118912180  | 0.96719508027931  |
| C | 9.13333725465367  | 8.57101145234918  | 5.18286666866211  |
| H | 9.87393405642763  | 8.47527944044746  | 4.37855473830332  |
| C | 6.94758333764533  | 12.04484666926585 | 10.71741166532617 |
| H | 6.36784226968561  | 11.81569070178763 | 11.62467782622597 |
| C | 8.17952597094781  | 12.71426880084966 | 10.81804487237413 |
| H | 8.56458526573558  | 13.00969604274356 | 11.80610113626400 |
| C | 9.90910330779725  | 3.75018373238853  | 1.93793131830471  |
| H | 8.98731404441070  | 3.80788667034251  | 1.32501742246752  |
| H | 10.08112158501172 | 2.68729724060033  | 2.20799568749102  |
| H | 10.75547612551788 | 4.08207127507363  | 1.30064031141352  |

|   |                  |                   |                  |
|---|------------------|-------------------|------------------|
| C | 9.00420493032965 | 7.53923286367872  | 6.12685438428336 |
| H | 9.63874406195863 | 6.64500217624299  | 6.03632886980627 |
| C | 7.05775658919542 | 13.89092839483892 | 5.35952749085910 |
| C | 2.05633891703117 | 11.04215545673664 | 6.72331868796872 |
| H | 0.95819075198697 | 10.97262941779587 | 6.70230310385035 |
| C | 8.07219514072058 | 7.63876813794306  | 7.17390894958321 |
| H | 7.96853991999372 | 6.82364415558615  | 7.90606632725317 |
| C | 4.23991713598270 | 10.0436599689132  | 6.32134478907846 |
| H | 4.85305263254437 | 9.20011262131859  | 5.97662059806927 |
| C | 2.83902977255441 | 9.95498442999577  | 6.30118109900980 |
| H | 2.35736314418427 | 9.02977367592174  | 5.94963405649880 |
| B | 7.23845356671352 | 12.48245259123168 | 5.22778503539608 |

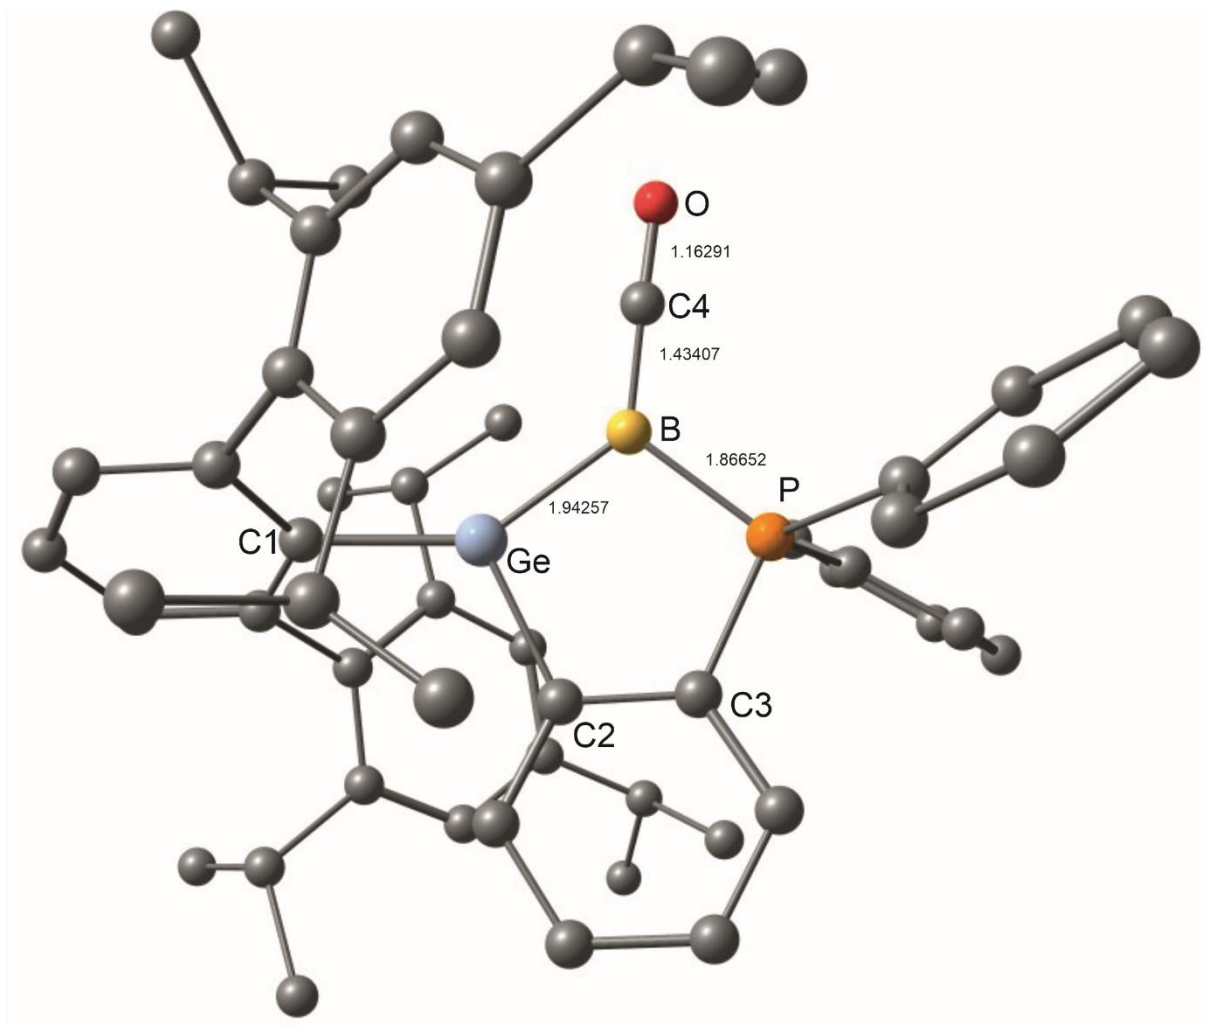

Figure SI69. Optimized structure of compound **6**.

### Coordinates of compound **6**.

122

Coordinates from ORCA-job bp86optfreq\_hnumac

|   |                   |                   |                   |
|---|-------------------|-------------------|-------------------|
| C | -3.44873261680661 | 18.39252149854298 | 8.85844574364726  |
| C | -5.19135727400420 | 17.25258488919203 | 10.11694862537998 |
| H | -5.81701381699256 | 16.36177534226328 | 10.27761703292192 |
| C | -5.33541616917114 | 18.35511750338483 | 10.98112577449560 |

|    |                   |                   |                   |
|----|-------------------|-------------------|-------------------|
| H  | -6.05685957535666 | 18.30733404562270 | 11.80840800961656 |
| C  | -4.54280671461086 | 19.50485039000031 | 10.79589509944845 |
| C  | -2.37924981732968 | 18.57847186410383 | 7.82760258693809  |
| C  | -1.08429022459392 | 18.04651565445913 | 8.06966413049915  |
| C  | -0.02862787875544 | 18.44923547901478 | 7.23501425277064  |
| H  | 0.98185192463048  | 18.05202120305676 | 7.42302528565174  |
| C  | -0.21248321026705 | 19.34335069531712 | 6.16299919848994  |
| Ge | -2.58246245337577 | 21.07965707298633 | 9.38435150499244  |
| P  | -0.96879304429066 | 23.51326607957021 | 8.59432847373997  |
| C  | -1.50893743722555 | 19.82827857350443 | 5.92210833652298  |
| H  | -1.67804224829925 | 20.49913342609119 | 5.07052231013289  |
| C  | -2.60403965545794 | 19.46595661300156 | 6.73071816931549  |
| C  | -0.81755457870332 | 17.09982477335591 | 9.23627179475852  |
| H  | -1.79965962957717 | 16.81417021650627 | 9.66348565479347  |
| C  | -0.12082349821272 | 15.80510049601647 | 8.78271902386212  |
| H  | 0.89808958319590  | 16.00147523974312 | 8.39002057719197  |
| H  | -0.69690110087691 | 15.29497059090803 | 7.98501159574665  |
| H  | -0.01524450709821 | 15.10277749962017 | 9.63420126979402  |
| C  | -0.02790689092263 | 17.80701840878162 | 10.35214801768013 |
| H  | 0.98649628080858  | 18.09537744880393 | 10.01096563484224 |
| H  | 0.08493970653185  | 17.14756968823407 | 11.23637980856241 |
| H  | -0.54482830593233 | 18.73047981327275 | 10.68333347602595 |
| C  | 0.98898227521170  | 19.75840296523852 | 5.32233574540464  |
| H  | 1.61448944551790  | 18.84605339438367 | 5.19916641629360  |
| C  | 1.83549213826258  | 20.79782086441802 | 6.0853772263888   |
| H  | 2.72394076493645  | 21.09645138434677 | 5.49296117836624  |
| H  | 2.19020905848041  | 20.40069514973893 | 7.05620590534074  |
| H  | 1.23816329050634  | 21.70785844930700 | 6.28997451030098  |
| C  | -4.02266799443015 | 19.90090948163438 | 6.36215224845095  |
| H  | -4.57923565603877 | 20.07886318396039 | 7.30722383526989  |
| C  | -4.74225805644750 | 18.74636983245798 | 5.63309468507209  |
| H  | -5.78647876166999 | 19.02598018220094 | 5.38483086134261  |
| H  | -4.77162404176963 | 17.83158721109305 | 6.25659652236875  |
| H  | -4.21752848286804 | 18.49544835929434 | 4.68854100493848  |
| O  | 1.56019241573922  | 20.70839190145442 | 9.64828739955026  |
| C  | -3.61380156568024 | 19.48469769975753 | 9.72925899817057  |
| B  | -0.77186030137401 | 21.75919574976191 | 9.20125743456474  |
| C  | -4.08745557278880 | 21.19257524368362 | 5.53625310553695  |
| H  | -3.67385192090134 | 21.05163424000940 | 4.51673565784729  |
| H  | -3.53445815640913 | 22.01938152450793 | 6.02444803167449  |
| H  | -5.13906773781563 | 21.51995595048316 | 5.41855175650502  |
| C  | -4.55473588854703 | 20.78940898502948 | 11.56045672974779 |
| C  | -3.30757978443723 | 21.23106018356595 | 12.12263230592889 |
| C  | -3.17482325287841 | 22.58887612526305 | 12.48271786841694 |
| H  | -2.22949927723009 | 22.94165874992300 | 12.91712470187602 |
| C  | -4.22478021758484 | 23.50742240639446 | 12.32657386914243 |
| C  | -5.47260040969079 | 23.01469737648198 | 11.89970123294994 |



|   |                   |                   |                   |
|---|-------------------|-------------------|-------------------|
| H | -6.32044524138740 | 23.71021856279249 | 11.82760708022539 |
| C | -5.67047946201452 | 21.67132755251286 | 11.53082859088275 |
| C | -2.26573268689514 | 20.19746830263976 | 12.57445070267129 |
| H | -2.14960019479030 | 19.44160309582663 | 11.77044369978730 |
| C | -0.87815247749895 | 20.77637893094543 | 12.86858945475477 |
| H | -0.16483907803875 | 19.95935134602042 | 13.09208549914480 |
| H | -0.88690854218332 | 21.45160330347670 | 13.74846225517937 |
| H | -0.48149464934549 | 21.33734285995303 | 11.99883013135993 |
| C | -2.82323553510942 | 19.44788709994773 | 13.80383171577372 |
| H | -3.78346113376953 | 18.94755227856171 | 13.56970032182206 |
| H | -3.00063706016380 | 20.15053814277575 | 14.64373755090754 |
| H | -2.10657162727165 | 18.67408597900382 | 14.14601097505011 |
| C | -4.00606039146198 | 24.98763893063273 | 12.59796858983416 |
| H | -3.03020130237339 | 25.07711206146635 | 13.12364802503254 |
| C | -3.88143198890999 | 25.74908553243610 | 11.26355083105444 |
| H | -3.05248943490117 | 25.34659753732330 | 10.65105195138523 |
| H | -3.68755732837341 | 26.82675859790668 | 11.43846502406299 |
| H | -4.81254548008767 | 25.65859614722061 | 10.66621798718494 |
| C | -5.08950436702784 | 25.59933038529479 | 13.50133642658162 |
| H | -4.84165296271566 | 26.65168166928763 | 13.74660847505900 |
| H | -5.19062679040004 | 25.03907107662085 | 14.45226554365029 |
| H | -6.08137382809562 | 25.60662458799593 | 13.00365566833134 |
| C | -7.05910645428201 | 21.16700256781256 | 11.15139391244182 |
| H | -6.92590577195763 | 20.35380990498079 | 10.40460995315978 |
| C | -7.72990263623462 | 20.55264808142815 | 12.40112992167974 |
| H | -8.70257433704931 | 20.08813133011529 | 12.14063516684589 |
| H | -7.91702131107732 | 21.33861905250525 | 13.16147931640460 |
| H | -7.09317576094364 | 19.78371776580985 | 12.88049840496397 |
| C | -7.98492398252009 | 22.22792266434555 | 10.53651875602946 |
| H | -7.51915149739471 | 22.74628809843423 | 9.67659593052149  |
| H | -8.27465690360577 | 23.00086332961713 | 11.27735251002862 |
| H | -8.92256232433250 | 21.75498202908889 | 10.18330721661766 |
| C | -3.57819297954007 | 22.60463568462015 | 8.70585331786424  |
| C | -4.96643258493595 | 22.68693852193768 | 8.51341400803648  |
| H | -5.60767264793252 | 21.83952644124576 | 8.79294087794949  |
| C | -5.52780809766915 | 23.83913974282287 | 7.93805697599251  |
| H | -6.61466591380869 | 23.89886647662020 | 7.77643143470281  |
| C | -4.70669212671354 | 24.91472084985149 | 7.55649942142937  |
| H | -5.15098267289704 | 25.81295244959961 | 7.10282081571408  |
| C | -3.31599262291744 | 24.84558303852032 | 7.74418336652696  |
| H | -2.67737058262771 | 25.68613133646856 | 7.43632410476100  |
| C | -2.75865523213128 | 23.68807968411294 | 8.31427708757373  |
| C | -0.51647201430996 | 24.78656658540999 | 9.79945459512486  |
| C | -0.35586663763649 | 24.41222553197342 | 11.14780648569124 |
| H | -0.40355992635251 | 23.34752919562496 | 11.41699979741314 |
| C | -0.14673111260958 | 25.39630040236851 | 12.12569203696440 |
| H | -0.01595519565023 | 25.10302046039094 | 13.17800742671363 |

|   |                   |                   |                   |
|---|-------------------|-------------------|-------------------|
| C | -0.09980513986968 | 26.75152903107518 | 11.75900702796832 |
| H | 0.06190413169235  | 27.52331055434127 | 12.52637215809292 |
| C | -0.24530290629724 | 27.12506735156134 | 10.41025130600928 |
| H | -0.19424115468680 | 28.18591993902799 | 10.12333586168494 |
| C | -0.45121003556577 | 26.14717833993356 | 9.42732707018948  |
| H | -0.55299876695401 | 26.44160462096831 | 8.37219585861554  |
| C | -0.12763601313232 | 23.91733826481251 | 7.05002775341572  |
| C | -0.76216939468845 | 23.66899742919234 | 5.81459745009405  |
| H | -1.79324800577646 | 23.28880488101959 | 5.78983875794635  |
| C | -0.06953407573853 | 23.90854007353424 | 4.61917584599023  |
| H | -0.56837615097498 | 23.73096957013018 | 3.65503809384777  |
| C | 1.25536011086900  | 24.37778705498666 | 4.65182835556722  |
| H | 1.79557188908196  | 24.56184526695633 | 3.71130064791824  |
| C | 1.89123126294231  | 24.61193703678809 | 5.88294990735884  |
| H | 2.92893902484743  | 24.97597614239085 | 5.90876410024063  |
| C | 1.20344587626956  | 24.38584553949034 | 7.08459762844662  |
| H | 1.69977510023789  | 24.57591171592294 | 8.04814246801034  |
| C | 0.50954389257417  | 21.16088462494488 | 9.43912164900736  |
| C | -4.26284013222961 | 17.26107645709369 | 9.06023399554640  |
| H | -4.16576807761231 | 16.38805236732058 | 8.39769695518281  |
| C | 0.62188376577870  | 20.26388768209760 | 3.92171991507372  |
| H | 1.53815370178778  | 20.44324573958185 | 3.32485431600473  |
| H | -0.00731154513254 | 19.53558975708664 | 3.37175223127493  |
| H | 0.07381362012369  | 21.22669960264811 | 3.97094908110507  |

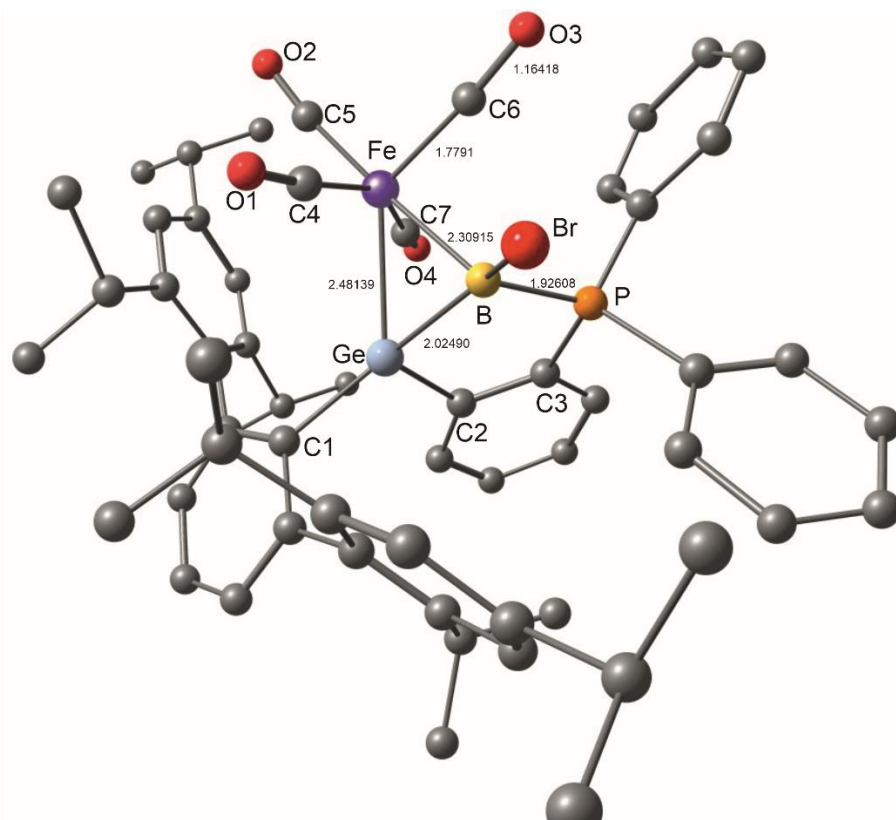

Figure SI70. Optimized structure of compound 10.

Coordinates of compound **10**.

130

Coordinates from ORCA-job bp86optfreq\_hnumac

|    |                   |                   |                   |
|----|-------------------|-------------------|-------------------|
| Br | 0.56838003704364  | 19.59768603160963 | 12.62090763485107 |
| Ge | 0.87708911376169  | 16.03624236220041 | 11.73498404072398 |
| Fe | 1.72754381524681  | 17.41192486870792 | 9.85308762346248  |
| P  | 3.14761101220444  | 17.66271670353552 | 13.03395558713847 |
| O  | 3.17813792822604  | 19.96745687703398 | 9.91849995374445  |
| O  | 3.73745605180843  | 15.24892613511823 | 9.86912502443855  |
| C  | -1.37537152240265 | 14.65806360390425 | 12.88966960241900 |
| O  | 1.83412810550848  | 17.28614547000449 | 6.92142277687076  |
| C  | -2.17895219699581 | 13.52188015292254 | 13.12476125324276 |
| H  | -2.79004704477175 | 13.48431261760966 | 14.03894929907278 |
| O  | -1.00714660892428 | 18.51433780920210 | 9.65405266966838  |
| C  | -2.20940700858597 | 12.46586076802770 | 12.20593753104911 |
| H  | -2.82783560161761 | 11.57710793105333 | 12.40339513814177 |
| C  | -1.47953930876887 | 12.56429211574631 | 11.01456063595413 |
| H  | -1.53777261338950 | 11.76281771071760 | 10.26316033038890 |
| C  | -0.67035081324144 | 13.68913029170366 | 10.73841527965984 |
| C  | 0.02558745330668  | 13.76060699847579 | 9.41142014685680  |
| C  | 1.16292596205175  | 12.95375238379256 | 9.13814964825599  |
| C  | 1.81411042575265  | 13.08710961866977 | 7.89802262093774  |
| H  | 2.71796703788349  | 12.48863058480893 | 7.70928822583886  |
| C  | 1.34328153604481  | 13.95146153733423 | 6.90121140197371  |
| C  | 0.15931365998585  | 14.66485386094006 | 7.15572223166995  |
| H  | -0.23106424245603 | 15.31733742978831 | 6.36278179831185  |
| C  | -0.50926047664979 | 14.60021263590199 | 8.38876332827848  |
| C  | -1.81263377374465 | 15.37426661458165 | 8.59268967566926  |
| H  | -1.75697763218698 | 15.85014354722798 | 9.59562612224856  |
| C  | -3.03310946678074 | 14.42903355521381 | 8.60097971765105  |
| H  | -3.11200257917924 | 13.89380639680222 | 7.63174292402685  |
| H  | -3.96820359479899 | 15.00731089644512 | 8.75059044840916  |
| H  | -2.97286151012951 | 13.67375824536935 | 9.40561291655947  |
| C  | -2.04876782705379 | 16.48167975246281 | 7.55518890475058  |
| H  | -1.17252610632110 | 17.14393907001059 | 7.42867930601837  |
| H  | -2.90462305523290 | 17.11383051625588 | 7.86359089778894  |
| H  | -2.29462550335059 | 16.05360411951082 | 6.56098049341363  |
| C  | 1.65967253812729  | 11.88166254959066 | 10.10317882478745 |
| H  | 1.17122121394859  | 12.06140879705383 | 11.08087574080775 |
| C  | 1.20663516524767  | 10.48760282152633 | 9.62245106718076  |
| H  | 0.10600455424861  | 10.43141122612825 | 9.50620577865300  |
| H  | 1.51792750714865  | 9.70016252506591  | 10.34047856291339 |
| H  | 1.65567574027669  | 10.24720750364645 | 8.63624182007339  |
| C  | 3.18199943021350  | 11.91236037958805 | 10.31681480335992 |
| H  | 3.72614173575960  | 11.60894941026611 | 9.39835277283534  |
| H  | 3.47567837379666  | 11.20328888478165 | 11.11792623503760 |

|   |                   |                   |                   |
|---|-------------------|-------------------|-------------------|
| H | 3.53362754870714  | 12.92178836928758 | 10.59788529416778 |
| C | -1.41741708504404 | 15.78323695735383 | 13.87774467329370 |
| C | -0.84364414077156 | 15.62730447843505 | 15.16698096018731 |
| C | -1.01289938945608 | 16.65574597006833 | 16.11521804416580 |
| H | -0.58377740001204 | 16.53033742494343 | 17.12221522134939 |
| C | -1.69090863982011 | 17.84461459495521 | 15.81069457216774 |
| C | -2.22935016635741 | 17.98649138597476 | 14.51853796088778 |
| H | -2.75723420025790 | 18.91499162161818 | 14.26316860809677 |
| C | -2.12716847941610 | 16.97867906037393 | 13.54765529133338 |
| C | -2.82473510360430 | 17.14334334043193 | 12.19647160953981 |
| H | -2.12976249053718 | 16.76258175749379 | 11.41786144017030 |
| C | -4.10139483069855 | 16.27970499097450 | 12.12377955479344 |
| H | -4.58534533424255 | 16.39073235394522 | 11.13165234427492 |
| H | -4.82890830218831 | 16.59974454828590 | 12.89876937685698 |
| H | -3.88837866974655 | 15.20529988802294 | 12.27730218226744 |
| C | -3.15880902739378 | 18.59774232781249 | 11.84192491425425 |
| H | -2.27164452651320 | 19.25446949940854 | 11.92184842470084 |
| H | -3.95809324556705 | 19.00267593860544 | 12.49768499270086 |
| H | -3.52717594782443 | 18.65598727989441 | 10.79942856263446 |
| C | -0.05640662905802 | 14.37843385956926 | 15.55592399896345 |
| H | 0.10222452598920  | 13.78806254113918 | 14.63063943615605 |
| C | -0.85269905905813 | 13.50081204406609 | 16.54026816519247 |
| H | -1.83387638043916 | 13.20281584854682 | 16.12033625447600 |
| H | -1.04744712230563 | 14.04333917948771 | 17.48913210788825 |
| H | -0.29095895879060 | 12.57635318632376 | 16.78862948916117 |
| C | 1.33252797505173  | 14.71829728551244 | 16.12278737456221 |
| H | 1.90844513770617  | 13.79129854362977 | 16.31815086773524 |
| H | 1.26467569118740  | 15.27804305145523 | 17.07835431739446 |
| H | 1.91876269387337  | 15.33432089589908 | 15.41538122914781 |
| C | -1.85022343463155 | 18.95358657886074 | 16.84190501643025 |
| H | -1.25092085956017 | 18.65690953089588 | 17.73251037646378 |
| C | -3.31683022106683 | 19.08007797700852 | 17.29759863067638 |
| H | -3.97006993372909 | 19.37024663026977 | 16.44838976419824 |
| H | -3.42428007183250 | 19.85424759183339 | 18.08566486318689 |
| H | -3.69737080322165 | 18.11962155179803 | 17.69971172873530 |
| C | -1.30383260235391 | 20.29839439163388 | 16.32798764551836 |
| H | -0.25259138708479 | 20.20916617315041 | 15.98950153793517 |
| H | -1.35161260513575 | 21.07301639649342 | 17.12101304351688 |
| H | -1.89647548029034 | 20.66778918883789 | 15.46588348018783 |
| C | 2.32625171832183  | 15.06720393262994 | 12.67044921075208 |
| C | 3.38730088948557  | 15.86938120566080 | 13.15244799680173 |
| C | 4.46903765670669  | 15.31201228346361 | 13.85732041204948 |
| H | 5.28087923759660  | 15.95445197079661 | 14.23118069511531 |
| C | 4.48428577351018  | 13.93163583594678 | 14.11515066366506 |
| H | 5.32200670113241  | 13.48612937620119 | 14.67224194134404 |
| C | 3.40876906280232  | 13.13207644734256 | 13.69219765280488 |
| H | 3.40111798108489  | 12.05610524687869 | 13.92463176119500 |

|   |                   |                   |                   |
|---|-------------------|-------------------|-------------------|
| C | 2.34146564267581  | 13.69651402953285 | 12.97287138579896 |
| H | 1.50337914505704  | 13.06300830907011 | 12.65009957684590 |
| C | 3.12598703287349  | 18.20473194210081 | 14.76571072562403 |
| C | 4.31611762226573  | 18.57078499715058 | 15.43028541313263 |
| H | 5.26455105711384  | 18.62099119117499 | 14.87639410901529 |
| C | 4.28720351709224  | 18.87852934643142 | 16.79848654133539 |
| H | 5.21641996313406  | 19.16757137222759 | 17.31260569654122 |
| C | 3.07518628289044  | 18.81760293995498 | 17.50714681614443 |
| H | 3.05186244366045  | 19.06105597137752 | 18.58033386176688 |
| C | 1.89352738245265  | 18.44537059216382 | 16.84583497855037 |
| H | 0.94471569115739  | 18.39151927769420 | 17.39734026250066 |
| C | 1.91218682081344  | 18.13926198832593 | 15.47740589199453 |
| H | 0.98519288187033  | 17.84416046236718 | 14.96702470001534 |
| C | 4.62030308314754  | 18.41473422225848 | 12.31296026044104 |
| C | 5.49978244239822  | 17.66304213088544 | 11.50773018153098 |
| H | 5.34244972832380  | 16.58339287496208 | 11.37736656429995 |
| C | 6.56871215263774  | 18.30242163249324 | 10.86181701389607 |
| H | 7.25170630334789  | 17.71427966443072 | 10.23053681796952 |
| C | 6.76368767219408  | 19.68500834943626 | 11.01773638138172 |
| H | 7.60168947408062  | 20.18317186820801 | 10.50690894560982 |
| C | 5.88548200871415  | 20.43448456611419 | 11.81968379491819 |
| H | 6.02876384379574  | 21.51949184914093 | 11.93255133191319 |
| C | 4.81212545258285  | 19.80569640748174 | 12.46375542493939 |
| H | 4.10902975169750  | 20.39517902759479 | 13.07076402283017 |
| C | 2.63749530374572  | 18.93670710372991 | 9.94258900491241  |
| C | 2.91116127162355  | 16.07414138890902 | 9.94960672041943  |
| C | 1.75882689402303  | 17.25891904565908 | 8.08297924200759  |
| C | 0.04753846116909  | 18.03583958108607 | 9.76381312223837  |
| C | -0.59188161288648 | 14.72520701006188 | 11.70862557556920 |
| B | 1.49052278038343  | 17.93301913257455 | 12.09015148177599 |
| C | 2.06606594956148  | 14.09581464566748 | 5.56959855729853  |
| H | 1.60854114497234  | 14.96587252425712 | 5.05050046359170  |
| C | 1.84958593634122  | 12.85094922885547 | 4.68721107358983  |
| C | 3.56295690576456  | 14.39997846724131 | 5.75580310851140  |
| H | 3.71292181294219  | 15.29070366146056 | 6.39651966659941  |
| H | 4.09442744230672  | 13.54932751154806 | 6.23113641607230  |
| H | 4.05038454225871  | 14.59026606176577 | 4.77735821070140  |
| H | 2.28357685024430  | 11.94750071348691 | 5.16524324093032  |
| H | 2.33299274184647  | 12.97479637195219 | 3.69560897386360  |
| H | 0.77023408357032  | 12.65676727260942 | 4.52420777768848  |

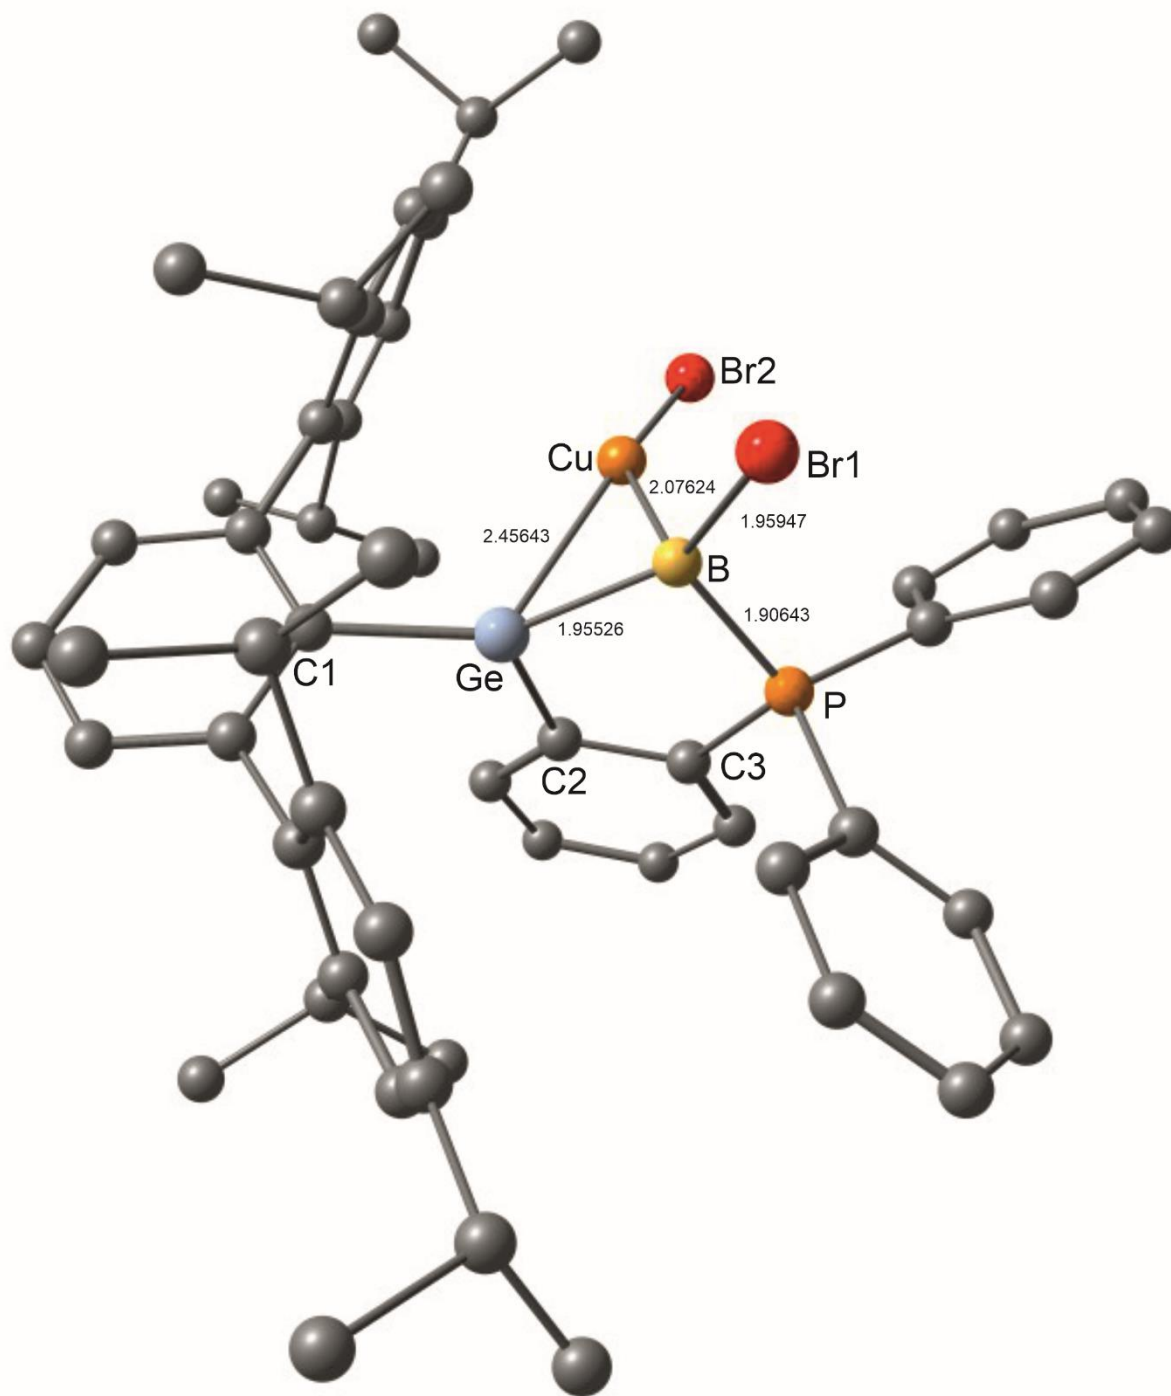

123

Coordinates from ORCA-job bp86optfreq\_hnumac

|    |                  |                   |                   |
|----|------------------|-------------------|-------------------|
| Ge | 2.25685260456348 | 6.89464170415967  | 11.88001016411649 |
| Cu | 3.47447728452337 | 8.85801934011980  | 12.71462013274384 |
| Br | 5.12277055048088 | 10.42641052879249 | 12.60160106059973 |
| B  | 2.79708854977087 | 7.18267595037331  | 13.73695111394647 |
| P  | 4.39359956978919 | 6.14201488436934  | 13.78857230061691 |
| C  | 0.92451380738524 | 7.11876670260850  | 10.49389591285158 |

|    |                   |                   |                   |
|----|-------------------|-------------------|-------------------|
| Br | 1.90702991615295  | 7.43370937201732  | 15.46446464103729 |
| C  | 0.20672186138343  | 5.96501560688249  | 10.09587652602554 |
| C  | -0.63811040675761 | 6.04918282699763  | 8.97151396575311  |
| H  | -1.21176000491094 | 5.16254894209251  | 8.66179492378905  |
| C  | -0.76532690893552 | 7.25980138101216  | 8.27008562170065  |
| H  | -1.42321653571502 | 7.31564459989322  | 7.38932181587199  |
| C  | -0.09145921866992 | 8.40783682365474  | 8.71077394438414  |
| H  | -0.23183532015969 | 9.36902788477883  | 8.19356860811761  |
| C  | 0.75778741410843  | 8.35833742265755  | 9.83911400652067  |
| C  | 1.39473203751185  | 9.61058083912355  | 10.35369988789202 |
| C  | 0.91233813861625  | 10.20757661677792 | 11.56073783412569 |
| C  | 1.43582686471183  | 11.45398133426676 | 11.94699665418195 |
| H  | 1.07676801043885  | 11.91264730915713 | 12.87653345492401 |
| C  | 2.41555852676358  | 12.12441439105324 | 11.19374906795023 |
| C  | 2.89969081892038  | 11.49740003678015 | 10.03670970265820 |
| H  | 3.71268150895280  | 11.98389875953227 | 9.47509083172785  |
| C  | 2.42336200196654  | 10.24633813596362 | 9.61001273068766  |
| C  | 4.59339140394999  | 9.41266358194578  | 8.63195008712728  |
| H  | 5.04632395098206  | 8.79126902121435  | 7.83167330765194  |
| H  | 4.81079107209142  | 8.94121106260856  | 9.61023613304484  |
| H  | 5.10612403080674  | 10.39616563071783 | 8.62460368796827  |
| C  | 2.76610711007567  | 10.29734837255975 | 7.09332659647121  |
| H  | 3.23457653615518  | 9.77797341283165  | 6.23143416847896  |
| H  | 3.15564100460184  | 11.33659221617448 | 7.11288702248690  |
| H  | 1.67444439144530  | 10.35380603148935 | 6.90789668663968  |
| C  | 3.07676672675313  | 9.56651569456672  | 8.41155330963743  |
| H  | 2.64346839681427  | 8.54687350713132  | 8.33641150913238  |
| C  | 2.95481079179459  | 13.48654519291202 | 11.60526286926065 |
| H  | 3.99305667942745  | 13.54113226204820 | 11.21047470845932 |
| C  | 2.13320577873041  | 14.60633231169062 | 10.93330415612110 |
| H  | 2.54971498886041  | 15.60657849393363 | 11.17493236358765 |
| H  | 1.07968131270962  | 14.58097421566485 | 11.28370241746181 |
| H  | 2.12095477805882  | 14.49371031799539 | 9.83015863479930  |
| C  | -0.18093716949381 | 9.54439711992503  | 12.40173489141143 |
| H  | 0.04922784312782  | 8.45844253425808  | 12.44528047561666 |
| C  | 3.02919454716263  | 13.67956718392200 | 13.12673826971905 |
| H  | 3.55046250495408  | 14.62771378286528 | 13.37068264491874 |
| H  | 3.58080999402580  | 12.84398789028055 | 13.60200591978348 |
| H  | 2.01893459603883  | 13.73830347511485 | 13.58397710149575 |
| C  | -1.56564116559435 | 9.68261282458470  | 11.73943241617673 |
| H  | -2.34125012960066 | 9.17592162034714  | 12.35033636217945 |
| H  | -1.58587857503318 | 9.23623549668964  | 10.72681318962395 |
| H  | -1.84644735213511 | 10.75240945829496 | 11.64691317254680 |
| C  | -0.22326761572201 | 10.03773661080997 | 13.85335289019184 |
| H  | -0.90643240069081 | 9.40050287192011  | 14.44903439471961 |
| H  | -0.59608233788199 | 11.08062802130333 | 13.92454734900181 |
| H  | 0.77568661616808  | 9.99173862668230  | 14.32904009175769 |

|   |                   |                  |                   |
|---|-------------------|------------------|-------------------|
| C | 0.25603825955083  | 4.71774433266635 | 10.92809242883894 |
| C | -0.56420270188168 | 4.65110209177586 | 12.09274903495615 |
| C | -0.60433164719685 | 3.45179757181045 | 12.82366918552789 |
| H | -1.25144338501605 | 3.38966099917680 | 13.71347203044069 |
| C | 0.12911303237312  | 2.31341221588077 | 12.43749196881628 |
| C | 0.97418230161653  | 2.42381132608369 | 11.32279421583307 |
| H | 1.58497278491571  | 1.56174776037306 | 11.02171488563857 |
| C | 1.05649702170724  | 3.60547594005640 | 10.56106718185099 |
| C | 1.96920600502394  | 3.65180910427408 | 9.34149163591346  |
| H | 2.13097707730365  | 4.72207888553456 | 9.09851124488185  |
| C | 1.28980887757574  | 3.00151982535607 | 8.12054090520371  |
| H | 1.94452936712350  | 3.05894564424303 | 7.22615280875671  |
| H | 0.33252956821244  | 3.50241120812978 | 7.87611383168976  |
| H | 1.06993080131146  | 1.93092266003980 | 8.31552011419052  |
| C | 3.34422875972057  | 3.01955053290922 | 9.61356011997846  |
| H | 4.03069531213462  | 3.20316917223667 | 8.76303884258528  |
| H | 3.27149437835884  | 1.91993002071945 | 9.74498386614558  |
| H | 3.81197023079072  | 3.44367290960936 | 10.52363287675368 |
| C | -1.45648677017548 | 5.82182978022903 | 12.49513382842850 |
| H | -1.05773714678311 | 6.72839410160402 | 11.99879154083295 |
| C | -1.45163852093108 | 6.09747138704300 | 14.00503594259928 |
| H | -2.04033505400998 | 7.01029779282958 | 14.22921392638953 |
| H | -0.42267791687191 | 6.26010310894546 | 14.38349677819316 |
| H | -1.90560390243520 | 5.26763164969704 | 14.58562975360370 |
| C | -2.88424793979022 | 5.61033660223465 | 11.95495380030291 |
| H | -3.52904398724795 | 6.48070700387884 | 12.19587544915842 |
| H | -3.34668022765157 | 4.70472801769908 | 12.40074510191481 |
| H | -2.88036167281941 | 5.48172352724125 | 10.85402227129997 |
| C | 3.95661990640162  | 6.28511568103756 | 11.09932782580553 |
| C | 4.29560677565090  | 6.20289475733473 | 9.73986814502682  |
| H | 3.56248123144075  | 6.50090763717438 | 8.97492790534062  |
| C | 5.57188380157635  | 5.75326872040971 | 9.35464804666545  |
| H | 5.83131378777019  | 5.69838984740665 | 8.28624916419170  |
| C | 6.51682214656648  | 5.37386900039216 | 10.32237788438651 |
| H | 7.51061603450058  | 5.01608782129495 | 10.01435619801633 |
| C | 6.19836373944395  | 5.46268050820396 | 11.69082703341727 |
| H | 6.94199103974414  | 5.18533548429431 | 12.45322713689103 |
| C | 4.92919152718911  | 5.92637494218313 | 12.06736178808156 |
| C | 4.09310093497688  | 4.48374235886875 | 14.46449461377407 |
| C | 2.77613009968263  | 3.98272705243125 | 14.47741743043965 |
| H | 1.94982058933403  | 4.59273952994006 | 14.08277854795314 |
| C | 2.52626986617688  | 2.70459896946802 | 14.99689178542513 |
| H | 1.49437614837941  | 2.32938136209748 | 15.02521253593771 |
| C | 3.58332295684757  | 1.91721687715888 | 15.48198222101039 |
| H | 3.38042872247972  | 0.91525917725091 | 15.89008146804172 |
| C | 4.90062046848192  | 2.40882717366058 | 15.44940033539228 |
| H | 5.73125609897229  | 1.79210843973274 | 15.82498747039438 |



|   |                   |                   |                   |
|---|-------------------|-------------------|-------------------|
| C | 5.15706432477931  | 3.69340715901603  | 14.94879935660525 |
| H | 6.18336875116660  | 4.08993544915744  | 14.94578962212483 |
| C | 5.73190709596529  | 6.85875015271153  | 14.75811514568645 |
| C | 6.69533273318613  | 7.69018244156017  | 14.15007251611577 |
| H | 6.69011370305765  | 7.84443607076414  | 13.06279926853025 |
| C | 7.64029077655873  | 8.35333003583002  | 14.94655404185586 |
| H | 8.38162648915026  | 9.01026185074375  | 14.46848647661320 |
| C | 7.62247895217135  | 8.19922675225315  | 16.34210639347080 |
| H | 8.36315594727557  | 8.7263322653491   | 16.96274616415030 |
| C | 6.65142663147748  | 7.38354714102311  | 16.95030814349889 |
| H | 6.62782091690694  | 7.27229351362993  | 18.04486683672859 |
| C | 5.70329482612789  | 6.71502527351279  | 16.16390859365199 |
| H | 4.93601103792700  | 6.08559935654058  | 16.63814543798134 |
| C | -0.07532593535544 | 0.99571315329808  | 13.17778536195602 |
| H | -0.18947425843901 | 1.24440105194796  | 14.25810955112708 |
| C | 1.09215319042865  | 0.00932054634634  | 13.03840084968286 |
| C | -1.39960574196461 | 0.34503958377337  | 12.72323178833646 |
| H | -2.25817880036433 | 1.03082562338543  | 12.86718026821058 |
| H | -1.35314527189686 | 0.08925836419303  | 11.64411522293356 |
| H | -1.60173334627619 | -0.58754959698331 | 13.29004156553257 |
| H | 1.17746167162184  | -0.37123629438107 | 11.99932135636415 |
| H | 0.93646674203156  | -0.87137852250180 | 13.69383211861651 |
| H | 2.06035820046621  | 0.47594042347766  | 13.30809409161187 |

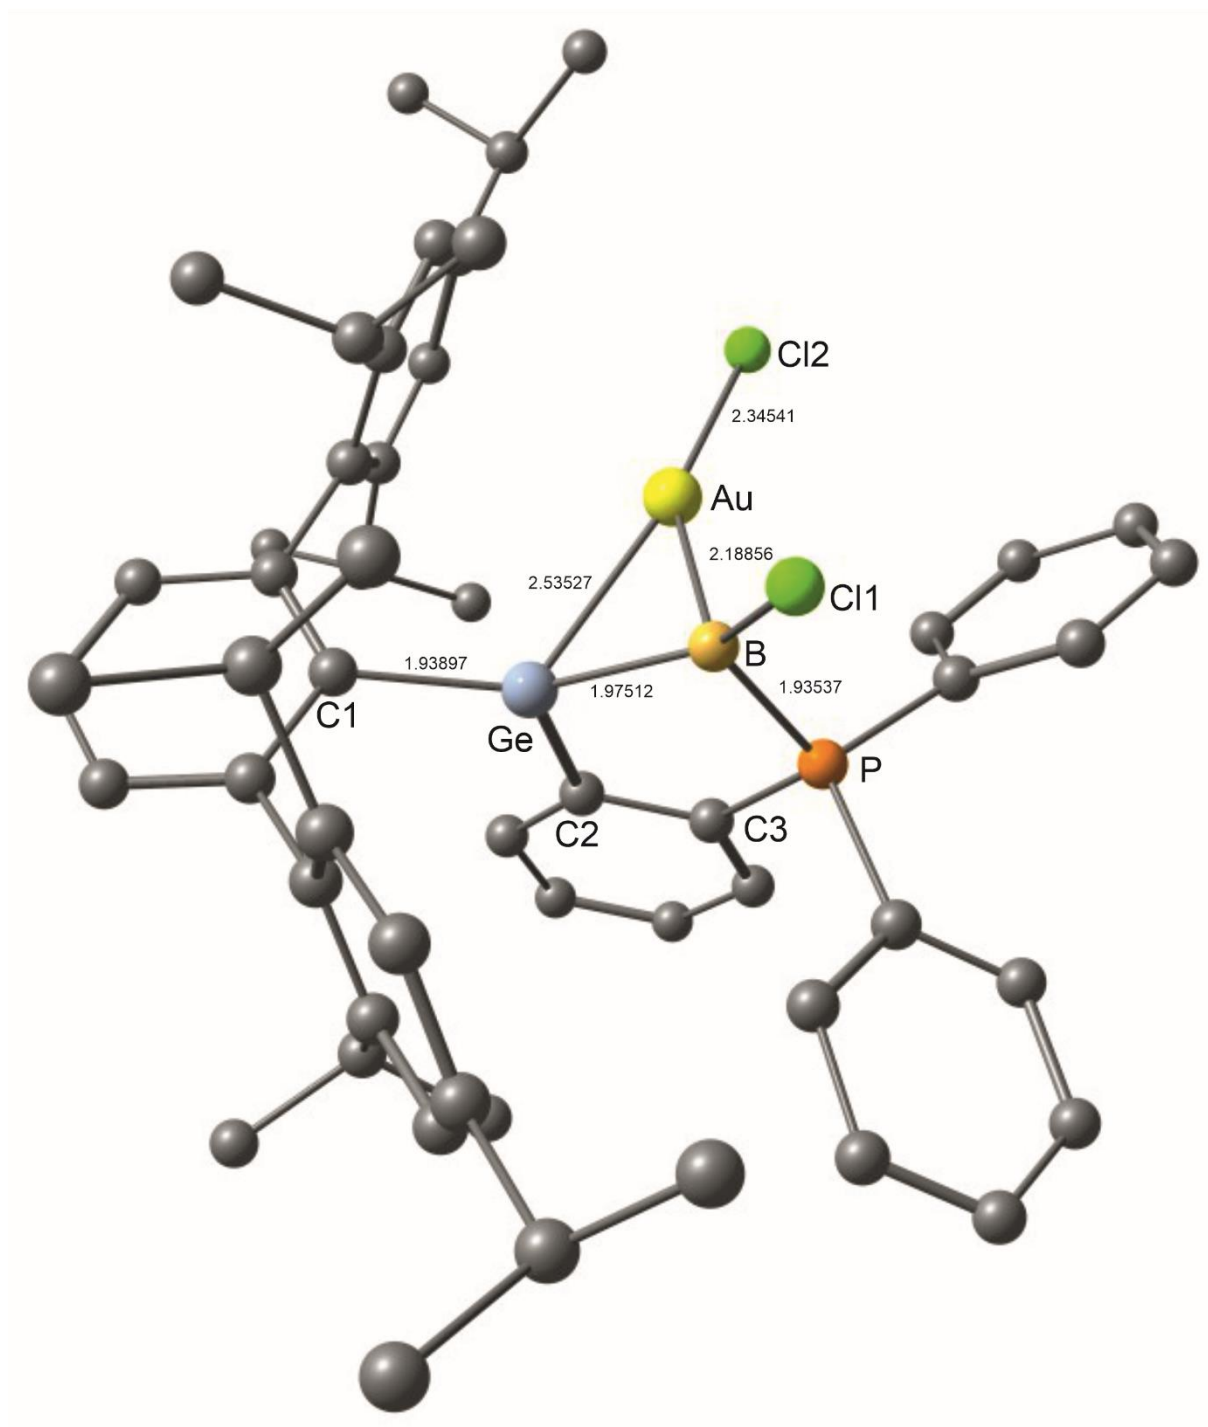

Figure SI72. Optimized structure of compound **12**.

Coordinates of compound **12**.

123

Coordinates from ORCA-job bp86optfreq\_hnumac

|    |                  |                   |                   |
|----|------------------|-------------------|-------------------|
| Au | 3.44791209679037 | 8.69748748709887  | 13.14984482669344 |
| Ge | 2.41332693376395 | 6.78123102586069  | 11.85170321260872 |
| P  | 4.61900643007594 | 5.85758785288506  | 13.68741017905733 |
| Cl | 1.93707002044885 | 6.47016256260548  | 15.30383758230984 |
| Cl | 4.62039610285712 | 10.67824708193703 | 13.60018296995513 |
| C  | 3.40840315184911 | 2.98310131651637  | 9.87343478315201  |

|   |                   |                   |                   |
|---|-------------------|-------------------|-------------------|
| H | 3.85098105713629  | 3.44483127641654  | 10.77803730615645 |
| H | 4.12788932351617  | 3.11784475989392  | 9.04135536353017  |
| H | 3.31700125544046  | 1.89245493823181  | 10.05686625762340 |
| C | 2.05443114600248  | 3.61896648681914  | 9.52060659805927  |
| H | 2.24308850228039  | 4.67511050659563  | 9.23772557165458  |
| C | 6.36972432761749  | 5.39947101808356  | 11.49190764731064 |
| H | 7.12999077949664  | 5.08010182070694  | 12.22174424431887 |
| C | 2.49356832783793  | 12.12583393162348 | 11.41409020145763 |
| C | 3.08591579228042  | 11.49377070444586 | 10.30920911716386 |
| H | 3.95355584107602  | 11.97453860072440 | 9.82930732942405  |
| C | 4.71107677996751  | 1.33717713364777  | 14.65666794863933 |
| H | 4.73376356643085  | 0.25261333240128  | 14.84291518496889 |
| C | 2.46683735030144  | 14.59084519470966 | 10.93144168678963 |
| H | 2.72083599035221  | 14.38807621528310 | 9.87117098618674  |
| H | 2.88483222985979  | 15.58282062724211 | 11.20292267384232 |
| H | 1.36042781468091  | 14.65442322678376 | 11.00291777912585 |
| C | 6.64610650276186  | 5.35739062938094  | 10.11295232838950 |
| H | 7.62861097512184  | 5.00775168257902  | 9.76211106909772  |
| C | 1.41064775272409  | 2.92998314018516  | 8.30159481429725  |
| H | 1.16481337476272  | 1.87189547039575  | 8.53088155842649  |
| H | 2.09894935756147  | 2.94116116925660  | 7.43094227514988  |
| H | 0.47160692765090  | 3.43654190699621  | 8.00269796356853  |
| C | -0.61905901291586 | 7.36360682728552  | 8.28086170903499  |
| H | -1.26743600965814 | 7.45970691510962  | 7.39643209327335  |
| C | 0.97577591540095  | 2.52348174700750  | 11.54521679379872 |
| H | 1.60717820030034  | 1.64165331510184  | 11.35403950632127 |
| C | 1.08627725450772  | 3.64306836127921  | 10.69701256038090 |
| C | 5.87039141336347  | 6.73188390250350  | 14.66873365980965 |
| C | 0.07195130279912  | 8.48537377087424  | 8.76374066928626  |
| H | -0.05214508576320 | 9.46628062909528  | 8.28009433241837  |
| C | 5.11099669325574  | 5.84627336030458  | 11.92320911163875 |
| C | 3.58182238015203  | 1.92256246974406  | 14.05915172546189 |
| H | 2.72356191260452  | 1.30004632694604  | 13.77139469001718 |
| C | -0.53178864437050 | 6.13295386957788  | 8.95265393050725  |
| H | -1.13166604028369 | 5.27205421551855  | 8.62049709142989  |
| C | 4.87261368753127  | 9.42220295837572  | 9.01701481762078  |
| H | 5.38349792202395  | 10.40557956257437 | 9.06849796551706  |
| H | 5.39207599617698  | 8.81360002044390  | 8.24845140114157  |
| H | 5.00420635768198  | 8.92607496460176  | 9.99884401652614  |
| C | 4.64982718301897  | 4.10054254704149  | 14.17524309621839 |
| C | 4.11099343928464  | 6.24627419719855  | 11.00244377486883 |
| C | 3.00589393454529  | 13.48721846118228 | 11.86549859006599 |
| H | 4.11185835037195  | 13.45106726329473 | 11.75045057695862 |
| C | 0.26117111820691  | 4.77104530993247  | 10.94295414702001 |
| C | 5.81809894390547  | 6.61592025811412  | 16.07531685996171 |
| H | 5.11458751263173  | 5.91284467170936  | 16.54673769340443 |
| C | 5.78605248396641  | 3.51670509140284  | 14.77156881538598 |

|   |                   |                   |                   |
|---|-------------------|-------------------|-------------------|
| H | 6.64849132363809  | 4.14322171707898  | 15.04454020347628 |
| C | 5.66576190131146  | 5.75545836598226  | 9.18864487208654  |
| H | 5.88484089809058  | 5.72122334185410  | 8.11026468799924  |
| C | 3.54036122938877  | 3.30432034363354  | 13.82352748358809 |
| H | 2.65254571578381  | 3.76072900413278  | 13.35836583576750 |
| C | 3.17417740526019  | 10.32358262826698 | 7.34366157619830  |
| H | 2.09957009555056  | 10.38240502711722 | 7.07712562153442  |
| H | 3.70606757263065  | 9.80943310273773  | 6.51587735235098  |
| H | 3.56139904570884  | 11.36233363936175 | 7.40083822832906  |
| C | 5.81028410283620  | 2.13474878128977  | 15.01682841733055 |
| H | 6.69510520788931  | 1.67908457005280  | 15.48679866684500 |
| C | 4.40577746825538  | 6.19739378161422  | 9.63063892109307  |
| H | 3.64589816266194  | 6.51119405880937  | 8.89838827494389  |
| C | 1.53751049802235  | 9.62331584621716  | 10.46354374793507 |
| C | 3.37933232391976  | 9.58324559487270  | 8.67703993364344  |
| H | 2.94911938850732  | 8.56625688111764  | 8.56053518658762  |
| C | -1.56371347503438 | 5.95085490692777  | 12.32274335298234 |
| H | -1.14581799394650 | 6.83167906775048  | 11.79730932022069 |
| C | -0.63455330436376 | 4.77188767360906  | 12.05167419102263 |
| C | 2.63542406507279  | 10.25492320501944 | 9.82492121829665  |
| C | -2.95395756727348 | 5.68451600639711  | 11.71341191742455 |
| H | -3.42923793373355 | 4.79791328970907  | 12.18344829939452 |
| H | -2.88464026041682 | 5.49283210517000  | 10.62401382981187 |
| H | -3.62372382358070 | 6.55602078623247  | 11.86600013280964 |
| C | 2.70746267013095  | 13.80711806833461 | 13.33543585622988 |
| H | 1.61922429536171  | 13.94124548428328 | 13.51287504397542 |
| H | 3.20340707562687  | 14.75386109387257 | 13.63197050562476 |
| H | 3.07653322783426  | 12.99627802901349 | 13.99399706466600 |
| C | 7.55648996961687  | 8.47071795887688  | 14.86593684522452 |
| H | 8.21344597452069  | 9.21474694333770  | 14.39265058840199 |
| C | 0.09002086969693  | 2.49680910210411  | 12.63535022994354 |
| C | 0.91925733562955  | 8.38540017289608  | 9.88990366903850  |
| C | 0.29784199698257  | 6.00136212132158  | 10.08314494482475 |
| C | 1.44409105967343  | 11.45806859422515 | 12.06533083151841 |
| H | 1.00711180859628  | 11.90385796613576 | 12.96753236120393 |
| C | -1.65689068035378 | 6.31275675262673  | 13.81246801968468 |
| H | -2.16205063567855 | 5.52042794423515  | 14.40334699208486 |
| H | -2.25070551693850 | 7.24005311388653  | 13.94289164540597 |
| H | -0.65324183793820 | 6.47679873620300  | 14.25275088058774 |
| C | -0.69599932929175 | 3.63702146925390  | 12.87575542209834 |
| H | -1.38797750918483 | 3.64243904426114  | 13.73069842057135 |
| C | 7.51969286899232  | 8.34498881394647  | 16.26396968991450 |
| H | 8.16082040973480  | 8.98399720525768  | 16.88987193176799 |
| B | 2.86917442544932  | 6.68025526726501  | 13.77084406669969 |
| C | 6.73318516563081  | 7.66809908182048  | 14.06399356113485 |
| H | 6.73618777557817  | 7.79083691237588  | 12.97146050331615 |
| C | 1.06130805361874  | 7.11981524824713  | 10.50373990159612 |

|   |                   |                   |                   |
|---|-------------------|-------------------|-------------------|
| C | 6.65033189334666  | 7.41943080121018  | 16.86744102351917 |
| H | 6.60881766275775  | 7.33242085066602  | 17.96365996512154 |
| C | -0.09766165619297 | 9.77399689154812  | 13.91575564097474 |
| H | 0.90523723177800  | 9.52460474230528  | 14.31991770288368 |
| H | -0.84154762783053 | 9.14228612245996  | 14.43954465335448 |
| H | -0.32047009638764 | 10.82936672647132 | 14.17488685032296 |
| C | -1.53562941271278 | 9.87775833033914  | 11.81486292538125 |
| H | -1.72753882548281 | 10.96760813736833 | 11.90202515350374 |
| H | -2.34689136310313 | 9.34186942611356  | 12.35065637574625 |
| H | -1.59742370232502 | 9.60715836688943  | 10.74174993038657 |
| C | -0.15807845595693 | 9.51991506009210  | 12.40275588146335 |
| H | -0.02323894667318 | 8.42795532445752  | 12.26380448442123 |
| C | 0.01977686850271  | 1.57828955744779  | 15.01064937265733 |
| H | 0.92702755210260  | 2.16256587550523  | 15.26293775516642 |
| H | 0.02653962680567  | 0.64670899042097  | 15.61296819594744 |
| H | -0.85887243278364 | 2.17260663822170  | 15.33580238745492 |
| C | -0.04900823164912 | 1.25597174731988  | 13.50751055861646 |
| H | 0.80597817335267  | 0.58731114309415  | 13.25803318752500 |
| C | 0.96493640643089  | 10.21036762402824 | 11.63130672605053 |
| C | -1.34119039865166 | 0.49123910838143  | 13.15700721566062 |
| H | -2.23477017928859 | 1.11434135910021  | 13.37012743410429 |
| H | -1.42738221345254 | -0.44178850999569 | 13.75195789671375 |
| H | -1.36971731143753 | 0.22213572229351  | 12.08207734881048 |

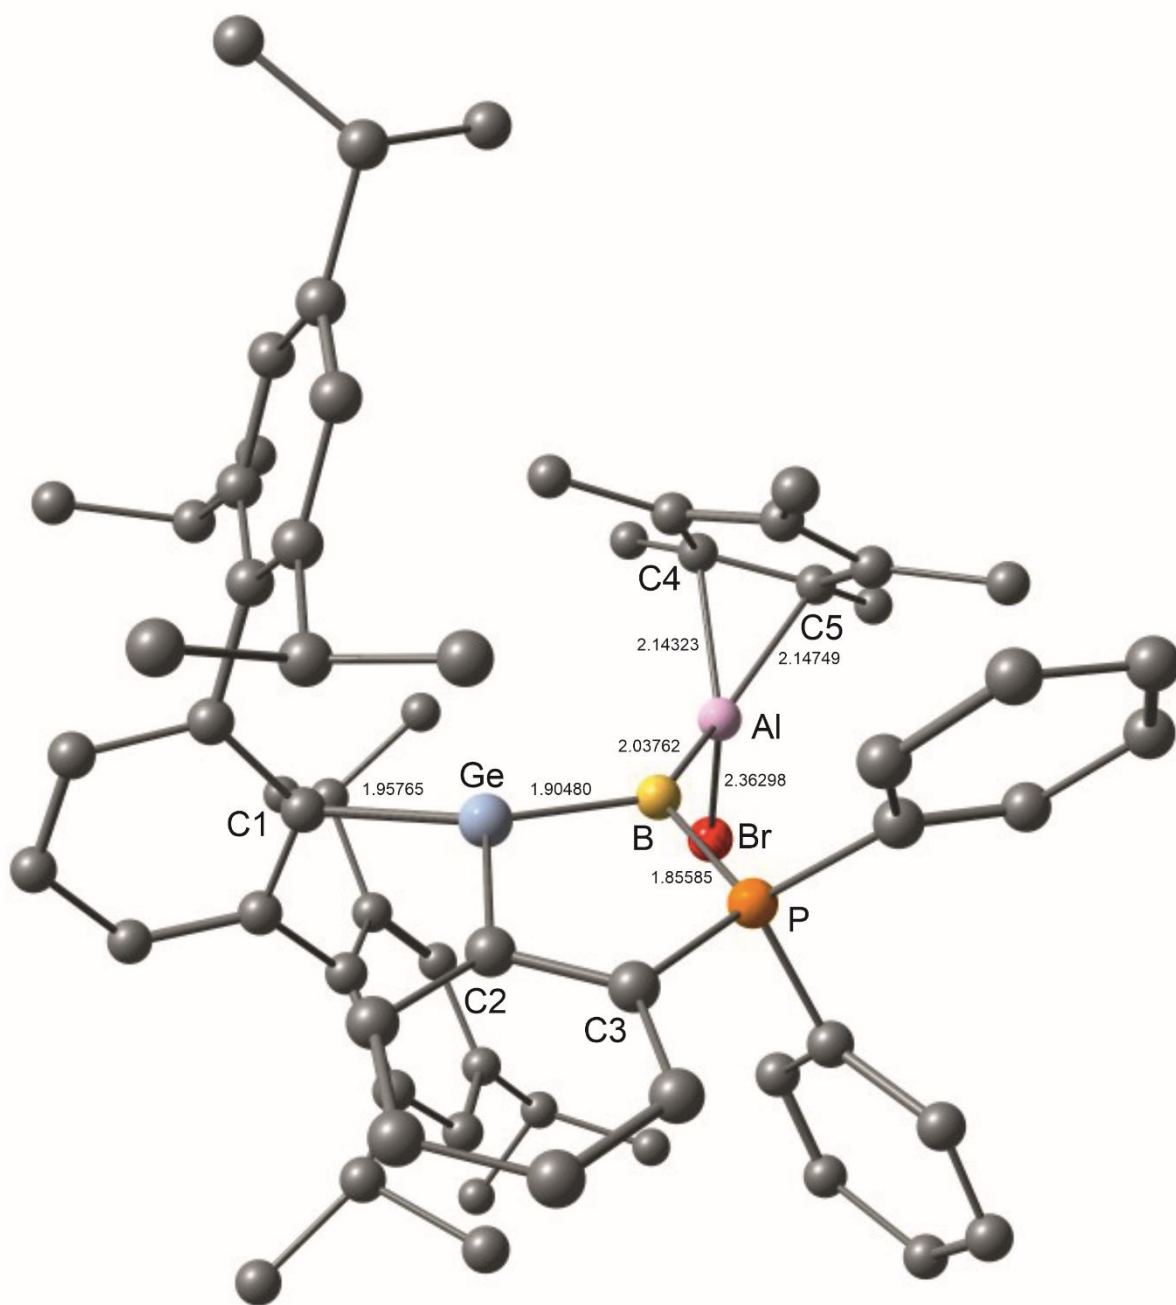

Figure SI73. Optimized structure of compound **13**.

Coordinates of compound **13**.

147

Coordinates from ORCA-job bp86optfreq\_hnumac

|   |                   |                   |                   |
|---|-------------------|-------------------|-------------------|
| C | 17.68862734135121 | 12.09775570485812 | -0.44813337892083 |
| H | 17.44805552379160 | 11.20239032228177 | -1.04103993756095 |
| C | 18.34319808766499 | 13.18455878768072 | -1.04677958341872 |
| H | 18.63512239881710 | 13.13427849045355 | -2.10700736425806 |
| C | 18.56853014782171 | 14.35607361520444 | -0.30895862327684 |
| H | 18.98773151622339 | 15.25060432150732 | -0.79407623737638 |
| C | 18.24234522035087 | 14.41029496351451 | 1.06173182661887  |
| C | 18.31494254623474 | 15.71717473505107 | 1.80085150516379  |
| C | 19.52264812648763 | 16.24396150217270 | 2.33116621680842  |

|    |                   |                   |                   |
|----|-------------------|-------------------|-------------------|
| C  | 19.49888184414727 | 17.49783587209183 | 2.97092456008696  |
| H  | 20.44016223640575 | 17.90098375901511 | 3.37628030728754  |
| C  | 18.31748187728107 | 18.25182978537743 | 3.08934816836098  |
| C  | 17.68397641179012 | 13.26211007484915 | 1.68974781281397  |
| Br | 15.99251802603836 | 16.88658126112641 | 6.04237880842903  |
| C  | 17.13604315152459 | 17.70688631056566 | 2.56585879380583  |
| H  | 16.20277391985496 | 18.28210589144325 | 2.66756112781600  |
| C  | 17.10831622823072 | 16.46146728928633 | 1.91811592984215  |
| C  | 20.84207231944216 | 15.49943043432827 | 2.17480160150953  |
| H  | 20.59342273197126 | 14.46073505694992 | 1.88085609430151  |
| C  | 21.68256328191967 | 16.10764028986581 | 1.03569374685498  |
| H  | 22.62440065962628 | 15.53774659165340 | 0.89220574844878  |
| H  | 21.95184193898606 | 17.16115203204575 | 1.26024869966197  |
| H  | 21.12829461110979 | 16.10231241412535 | 0.07572172577945  |
| C  | 21.64403675642944 | 15.42568959139033 | 3.48309198061210  |
| H  | 22.51448221445263 | 14.74861350470399 | 3.36780467983787  |
| H  | 21.02339611253335 | 15.03867291276100 | 4.31259539273240  |
| H  | 22.03089071697890 | 16.41983440032949 | 3.78932576379407  |
| C  | 18.30291307513773 | 19.64413483789495 | 3.70529502114645  |
| H  | 17.23729972341174 | 19.95869503835207 | 3.75010875975548  |
| C  | 19.05074427469928 | 20.64707525802715 | 2.80531662080750  |
| H  | 18.62893128198297 | 20.65852657687235 | 1.78008883566970  |
| H  | 20.12520825635162 | 20.37950615629838 | 2.72178711891441  |
| H  | 18.98986171285065 | 21.67615002365340 | 3.21733439677746  |
| C  | 18.84732583831940 | 19.66460977930873 | 5.14141204657002  |
| H  | 19.92603716465338 | 19.40210884800508 | 5.16046549528391  |
| H  | 18.29821460647550 | 18.94476492737099 | 5.78068598462941  |
| H  | 18.74658796594049 | 20.67526328785479 | 5.58853470839264  |
| C  | 15.78008481419493 | 15.93518508040201 | 1.38584926751190  |
| H  | 15.99762031226873 | 15.07790001753123 | 0.71786391341071  |
| C  | 15.01630892536163 | 16.97273698027911 | 0.54600755365888  |
| H  | 15.64473773753777 | 17.36270210707980 | -0.28003440621453 |
| H  | 14.68331452924930 | 17.83777595108395 | 1.15585391336626  |
| H  | 14.10773472629089 | 16.51556948970399 | 0.10218439440672  |
| Ge | 17.96923474650515 | 13.15866517007733 | 3.62373929563192  |
| P  | 19.05324260602270 | 13.16180786988431 | 6.29761005658367  |
| Al | 15.83114647502317 | 14.53185758646220 | 6.15608488011458  |
| C  | 17.31047189740162 | 12.13244348127612 | 0.91237905165809  |
| B  | 17.48066083805869 | 13.59488646102441 | 5.41238588528486  |
| C  | 14.92090277785352 | 15.41342044483505 | 2.54759923372298  |
| H  | 13.95122427202616 | 15.02338898027199 | 2.18142604216869  |
| H  | 14.72208110237137 | 16.21485507758310 | 3.28633298715153  |
| H  | 15.44156121170075 | 14.59572886981280 | 3.08675356000683  |
| C  | 16.41237245691788 | 11.04816213990682 | 1.44407274250573  |
| C  | 15.01295254600600 | 11.13988666840504 | 1.17579984150169  |
| C  | 14.16501931429798 | 10.11741316477329 | 1.63512543267571  |
| H  | 13.08673765242620 | 10.19272570272576 | 1.42981354813079  |

|   |                   |                   |                   |
|---|-------------------|-------------------|-------------------|
| C | 14.64478635968706 | 9.01402765636186  | 2.36386351456856  |
| C | 16.02208959169325 | 8.94606525605342  | 2.61742231036184  |
| H | 16.41588790743452 | 8.08480592277149  | 3.18033204011289  |
| C | 16.91563940817525 | 9.93442704653188  | 2.16145576362444  |
| C | 14.42421276624086 | 12.29911989811478 | 0.37020217099280  |
| H | 15.10954977930092 | 13.16345212989286 | 0.49324999260172  |
| C | 13.02886730672690 | 12.73774928873314 | 0.84713782823354  |
| H | 12.73014296169684 | 13.67697980961741 | 0.33891287752586  |
| H | 12.99859899317221 | 12.91225682902101 | 1.93934756647992  |
| H | 12.25373350136807 | 11.98087164899859 | 0.60623661451486  |
| C | 14.36651294564580 | 11.95489711997537 | -1.13239369694903 |
| H | 13.95541408010378 | 12.80563711447912 | -1.71479640024304 |
| H | 13.71241178390227 | 11.07400635223532 | -1.30215613157343 |
| H | 15.36654314966422 | 11.71690314686313 | -1.53936668275907 |
| C | 13.70206805744765 | 7.93456023586631  | 2.87920222238971  |
| H | 14.33940413685824 | 7.14313907184503  | 3.33213078324270  |
| C | 12.78016967038429 | 8.47746908876241  | 3.98758759335056  |
| H | 12.11396423106888 | 9.27495165422183  | 3.59650566551577  |
| H | 13.36689158971411 | 8.91167040852141  | 4.82153659451323  |
| H | 12.13539319813793 | 7.67321261389071  | 4.39894631103085  |
| C | 12.89149580574631 | 7.28705979370154  | 1.74198378154773  |
| H | 12.21238237602673 | 8.02223193568179  | 1.26178505302233  |
| H | 12.26301658240069 | 6.45706770928856  | 2.12622513911512  |
| H | 13.55729421410982 | 6.88119239627709  | 0.95392498267812  |
| C | 18.40838837198478 | 9.75675972391409  | 2.38344567405770  |
| H | 18.88182638444658 | 10.73219854646367 | 2.17199471282003  |
| C | 19.00014631543701 | 8.75409307740562  | 1.37605631698373  |
| H | 18.79883203755497 | 9.07111392477593  | 0.33282745185192  |
| H | 18.56134730307042 | 7.74321656884259  | 1.51175843273394  |
| H | 20.09960791045836 | 8.67195102235648  | 1.50535387028069  |
| C | 18.75677130708063 | 9.38693328810185  | 3.83174122347883  |
| H | 18.43429990218817 | 8.35671707519507  | 4.08958819241828  |
| H | 18.26353812565772 | 10.08700248467841 | 4.53551223928216  |
| H | 19.85235310857761 | 9.44995785872867  | 3.99390423065076  |
| C | 19.83676984884390 | 12.52489205393982 | 3.76902835425146  |
| C | 20.27213448431775 | 12.49215501284988 | 5.11120564397102  |
| C | 21.55743970875577 | 12.05110681371170 | 5.45874600324395  |
| H | 21.88173850853338 | 12.03412651537757 | 6.50993535133076  |
| C | 22.43651203193570 | 11.63104862458039 | 4.44227482688558  |
| H | 23.44707193653871 | 11.28044092206733 | 4.70074706546840  |
| C | 22.02475745534187 | 11.67596020866381 | 3.09843511610531  |
| H | 22.71855290207192 | 11.36191566630247 | 2.30296066450185  |
| C | 20.73348953486857 | 12.12248119848390 | 2.76178061693784  |
| H | 20.42460310640724 | 12.15604352446856 | 1.70475739532673  |
| C | 18.95016608928931 | 11.93768369002360 | 7.64211554545060  |
| C | 18.57019534470535 | 12.34389829461461 | 8.93722554937783  |
| H | 18.39768719968253 | 13.40975398882631 | 9.14789829723980  |



|   |                   |                   |                   |
|---|-------------------|-------------------|-------------------|
| C | 18.41752564512659 | 11.39296493323255 | 9.95800395653388  |
| H | 18.12639522465733 | 11.71932209980017 | 10.96804418199657 |
| C | 18.63115205656948 | 10.02983993529107 | 9.69133247776854  |
| H | 18.50862418051934 | 9.28545550898601  | 10.49272966967266 |
| C | 19.00727163796363 | 9.62107435477247  | 8.39963127082154  |
| H | 19.17930647174413 | 8.55547391377616  | 8.18470528692425  |
| C | 19.17067683370680 | 10.56950888855106 | 7.37994362042246  |
| H | 19.47062469376487 | 10.25064617772193 | 6.37254097020038  |
| C | 19.91931114845984 | 14.57529390168436 | 7.05698706234790  |
| C | 20.92154293268008 | 14.37979196617997 | 8.03236904608053  |
| H | 21.12990701792179 | 13.36952313961285 | 8.41433062187557  |
| C | 21.64409739070557 | 15.47461914131362 | 8.52619633228179  |
| H | 22.42445941339989 | 15.31795634515944 | 9.28668337492396  |
| C | 21.36686410301644 | 16.76865229787855 | 8.05088706633514  |
| H | 21.92985904577266 | 17.63065218518057 | 8.44075583365295  |
| C | 20.36779654580367 | 16.96304551671303 | 7.08416411495429  |
| H | 20.14303003500300 | 17.97229071690650 | 6.71631454597671  |
| C | 19.64227341144334 | 15.87145379959831 | 6.58067001220880  |
| H | 18.85887001423714 | 16.01828786605008 | 5.82023898361494  |
| C | 13.76086548282604 | 13.99774212467486 | 6.00751067353634  |
| C | 12.80479330764818 | 14.81323123009328 | 5.18114127954389  |
| H | 12.80975014772197 | 14.49200109178639 | 4.12317059128271  |
| H | 13.05082347641165 | 15.89412931710753 | 5.20632328084229  |
| H | 11.76544216174468 | 14.69910723721224 | 5.55886103884877  |
| C | 14.09842444531117 | 14.27975309413658 | 7.39940688453323  |
| C | 13.54619057265065 | 15.41215682490724 | 8.21737956203680  |
| H | 13.44958667685740 | 16.33860184200118 | 7.61927801472461  |
| H | 14.19560500125032 | 15.64770202591767 | 9.08317417640225  |
| H | 12.53900732015206 | 15.15558655881491 | 8.61479111093039  |
| C | 14.82040570010724 | 13.13791303569367 | 7.90605421682673  |
| C | 15.25826541224840 | 12.99168128921043 | 9.33520741605113  |
| H | 15.88480226078627 | 12.09296339508514 | 9.47598518152482  |
| H | 14.37835271339269 | 12.89686790284495 | 10.00826300103152 |
| H | 15.84021990773316 | 13.86639399091688 | 9.69216264883068  |
| C | 14.91701261719216 | 12.16140425683522 | 6.86567109504505  |
| C | 15.67729352705867 | 10.86944464794138 | 6.89975198180263  |
| H | 16.45917756856081 | 10.85737565628306 | 6.10936382142307  |
| H | 15.01488276723238 | 9.99648868050847  | 6.71995146847031  |
| H | 16.18783564404687 | 10.71193869821168 | 7.86851078028853  |
| C | 14.28591285498221 | 12.68865814388706 | 5.70122490508270  |
| C | 14.25564896037079 | 12.01844775727217 | 4.36346713210386  |
| H | 14.29694229331682 | 12.75257830702801 | 3.53829697617857  |
| H | 13.33522197691435 | 11.41563109407524 | 4.21740005478687  |
| H | 15.11754629771315 | 11.33672000566604 | 4.22691806375002  |

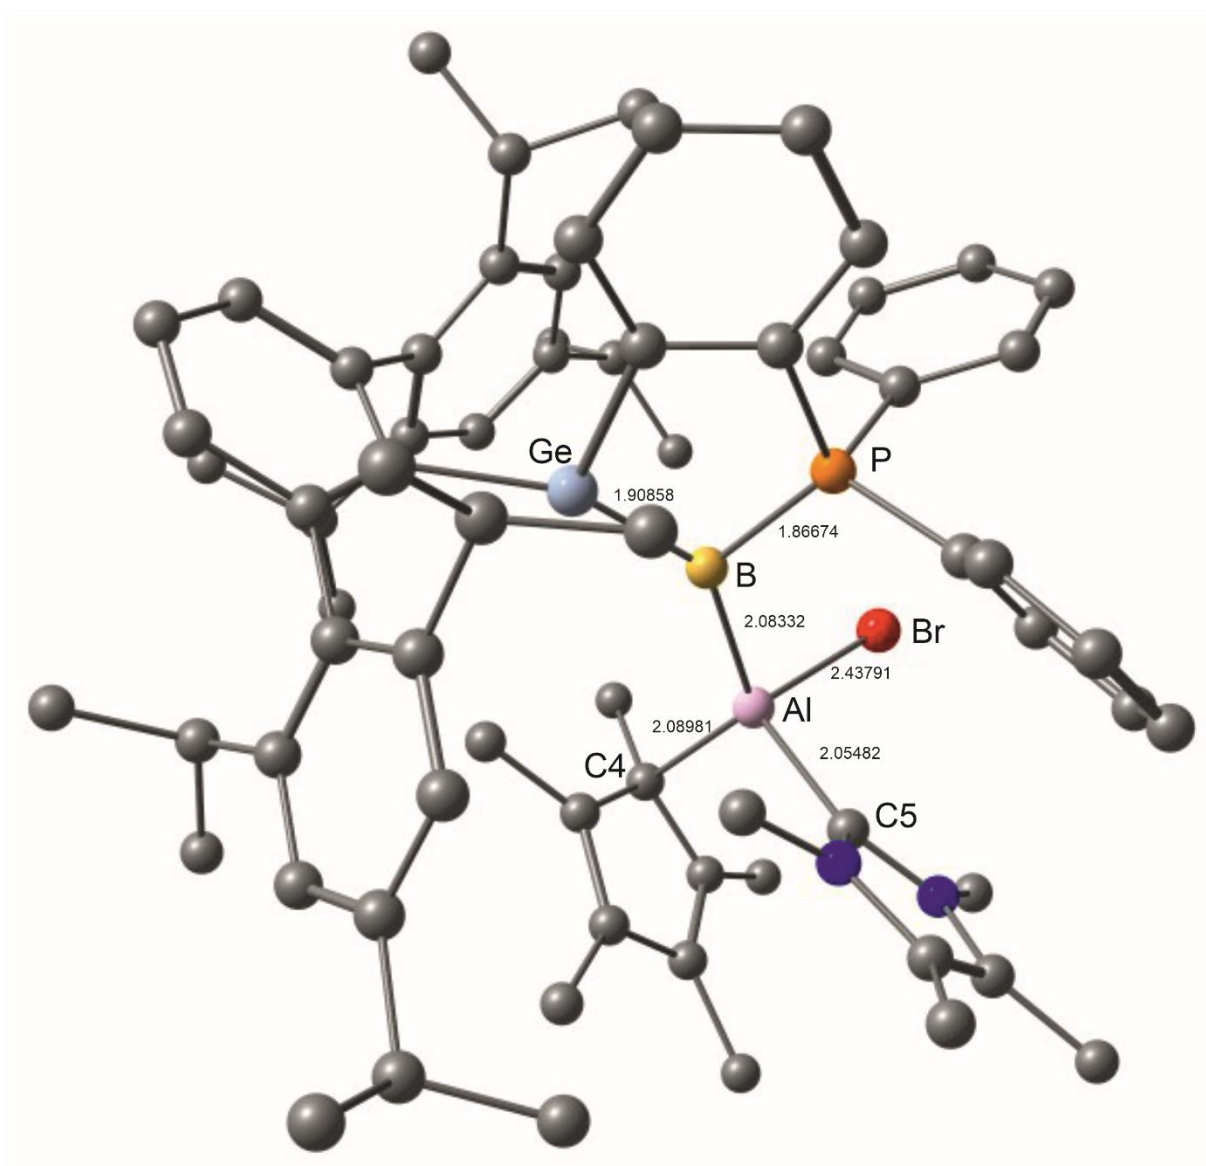

Figure SI74. Optimized structure of compound **14**.

#### Coordinates of compound **14**.

168

Coordinates from ORCA-job bp86optfreq\_hnumac

|    |                   |                   |                  |
|----|-------------------|-------------------|------------------|
| P  | 3.71194727586736  | 11.24841233081702 | 6.12698679810001 |
| Al | 1.59212312216452  | 8.64330561371071  | 5.96006290767154 |
| N  | 0.43977538579433  | 9.87996306859948  | 8.50505993451976 |
| C  | 0.63026635894563  | 12.89893175957393 | 2.84476306815699 |
| N  | 1.14273985917607  | 7.89138240900524  | 8.94584905222643 |
| C  | -0.43059015501459 | 13.78953210250782 | 3.15505285004850 |
| C  | -0.70837441567946 | 14.84243642942361 | 2.25430402613191 |
| H  | -1.49150510737939 | 15.57095483006273 | 2.51431119295855 |
| C  | -0.00100361418094 | 14.97027423555885 | 1.04954667030127 |
| H  | -0.21633997603844 | 15.81104746194069 | 0.37265141569537 |

|    |                   |                   |                   |
|----|-------------------|-------------------|-------------------|
| C  | 0.94104995057102  | 13.99591655558179 | 0.68322737971179  |
| H  | 1.43995617385413  | 14.04713224110948 | -0.29640406670775 |
| C  | 1.25779221212411  | 12.94614917003898 | 1.56725735362823  |
| C  | -1.31692929577797 | 13.59254247096710 | 4.35683234844626  |
| C  | -2.51771215847621 | 12.83475334327519 | 4.20992510686149  |
| C  | -3.35986563880483 | 12.68027550682649 | 5.32745916060032  |
| H  | -4.29022629997868 | 12.10268310706537 | 5.22267568956598  |
| C  | -3.06380676981080 | 13.24288803674103 | 6.58043386633527  |
| C  | 0.51949974897721  | 5.07967504971853  | 5.96200019286780  |
| H  | 0.21725102676757  | 4.45204280685366  | 5.09364088867107  |
| H  | 0.21132838584817  | 4.53428416447528  | 6.87654299832309  |
| H  | 1.62942870468519  | 5.12227013400207  | 5.94687242472500  |
| C  | -0.09204795249020 | 6.44751460275564  | 5.88572513315101  |
| C  | 0.27169026812540  | 7.44010130894925  | 4.87559621034925  |
| C  | -0.66431581977859 | 8.56274550272582  | 5.03808330270614  |
| Br | 3.63267093685366  | 7.30942052603764  | 5.97830616429573  |
| Ge | 1.70331138507148  | 12.02481651305989 | 4.23932247477206  |
| C  | -1.13479272209851 | 6.98113311272991  | 6.66484283326952  |
| C  | -1.87646398163019 | 13.98253717743799 | 6.70253916498302  |
| H  | -1.62408951597640 | 14.44772807495974 | 7.66860877068074  |
| C  | -1.00701022937823 | 14.17699545789263 | 5.61279062156813  |
| C  | -2.93334294000730 | 12.23101212620134 | 2.86705256771016  |
| H  | -1.99941105243888 | 11.92257293628004 | 2.34964806887642  |
| C  | -3.63988857373949 | 13.27388045171432 | 1.97529108169342  |
| H  | -2.99046370179982 | 14.13947564376145 | 1.75338191491931  |
| H  | -4.55708172485238 | 13.65015692448724 | 2.47497436439926  |
| H  | -3.93866908017287 | 12.81798952854106 | 1.00858444658720  |
| C  | -3.83926216570405 | 10.99395234956280 | 2.99579516950692  |
| H  | -3.92427640304353 | 10.48402933505446 | 2.01488467658344  |
| H  | -4.86851852350606 | 11.27455389231441 | 3.30260664911836  |
| H  | -3.45553061261023 | 10.26076905152189 | 3.72924218361150  |
| C  | -4.03663785983663 | 13.09948462111414 | 7.74425460783015  |
| H  | -4.86349995214261 | 12.44367727040926 | 7.39347928113200  |
| C  | -4.64847674134377 | 14.46287999173833 | 8.12026171979645  |
| H  | -5.13345642163343 | 14.93813996073197 | 7.24416346517263  |
| H  | -3.86881386213009 | 15.16121563248385 | 8.49026818004739  |
| H  | -5.40952521393309 | 14.35208814342246 | 8.92059033701732  |
| C  | -3.39444508845251 | 12.41990209767731 | 8.96597026356289  |

|   |                   |                   |                  |
|---|-------------------|-------------------|------------------|
| H | -3.02711547714398 | 11.40643245827053 | 8.70865659444755 |
| H | -4.12501424635930 | 12.31833241611542 | 9.79506574656434 |
| H | -2.53524927250547 | 13.01054260691764 | 9.34716159740411 |
| C | 0.20533921446441  | 15.08066691580416 | 5.77629070038385 |
| H | 0.84240319532736  | 14.93079935655766 | 4.88601873136768 |
| C | -0.21293655072836 | 16.56248654993089 | 5.78021722577750 |
| H | 0.67887466541061  | 17.22062945883712 | 5.83969285828085 |
| H | -0.86785364867134 | 16.79308246706915 | 6.64683190112498 |
| H | -0.77190453012401 | 16.82296065264996 | 4.85888516110696 |
| C | 1.05549598534705  | 14.72393134986820 | 7.00229630307869 |
| H | 1.31998900430739  | 13.64951175928022 | 6.98219998800183 |
| H | 0.52715396383288  | 14.93600837930885 | 7.95564016112604 |
| H | 2.00078009073952  | 15.30412687985114 | 7.00097281318606 |
| C | 2.16290672035816  | 11.80455120945228 | 1.19632071457737 |
| C | 1.55508647540283  | 10.55055993094265 | 0.87132453849274 |
| C | 2.37526778719936  | 9.42095301139044  | 0.72436221396848 |
| H | 1.91096244912260  | 8.45021614804070  | 0.50128218802469 |
| C | -1.48171646853065 | 8.28297567574648  | 6.15112422047537 |
| C | -1.76731673869357 | 6.37547430383411  | 7.88548266878976 |
| H | -2.87432276760909 | 6.32191902328965  | 7.79766425762549 |
| H | -1.56005656272389 | 6.97272056701950  | 8.80385959472932 |
| H | -1.40758843482163 | 5.34335967389123  | 8.07123125857538 |
| C | 0.94931198427506  | 7.08566223410415  | 3.56697080472157 |
| H | 0.23319506460543  | 6.62958087612190  | 2.84738654649317 |
| H | 1.77336452139047  | 6.36458157943588  | 3.72917367840252 |
| H | 1.40063484786949  | 7.97272882744598  | 3.07766831263320 |
| C | -2.54829586769615 | 9.16662638748733  | 6.72944404456842 |
| H | -2.54950219839599 | 10.17311167718173 | 6.26562267153069 |
| H | -2.42966375759570 | 9.29872272137481  | 7.82873243736746 |
| H | -3.56564052633407 | 8.73940217344103  | 6.58346867331955 |
| B | 2.21489331229918  | 10.51419976978328 | 5.28765339372990 |
| C | -0.79553434046255 | 9.69770512656046  | 4.07025990419863 |
| H | 0.15975239955164  | 9.89008262455391  | 3.54579731041625 |
| H | -1.09789537626852 | 10.64256559662835 | 4.56337180644256 |
| H | -1.54715834988220 | 9.47311853357230  | 3.28593960083049 |
| C | 3.77608214084873  | 9.49162518718534  | 0.85240524338728 |
| C | 4.35346805517790  | 10.74895025749399 | 1.07494280726635 |
| H | 5.44979494512119  | 10.82367990443534 | 1.13870312269182 |

|   |                   |                   |                   |
|---|-------------------|-------------------|-------------------|
| C | 3.57693206772589  | 11.91200577463485 | 1.24591773413982  |
| C | 0.05016452899607  | 10.45425339435300 | 0.61278859906511  |
| H | -0.45784468873377 | 11.02937168710972 | 1.41634397347973  |
| C | -0.50864294713654 | 9.02584369164935  | 0.63534488250647  |
| H | -1.61580511467112 | 9.05207794962603  | 0.58211158718086  |
| H | -0.22609844962683 | 8.47882253312440  | 1.55203594067884  |
| H | -0.15530089718968 | 8.43649805562013  | -0.23662081241096 |
| C | -0.30990451932639 | 11.12140691377083 | -0.73178849103367 |
| H | 0.19612775855138  | 10.59748921258277 | -1.56939290390632 |
| H | -0.00804777974567 | 12.18456487005608 | -0.76189729449575 |
| H | -1.40474847164391 | 11.07469369151447 | -0.90828678754383 |
| C | 4.63972688807447  | 8.24384038830866  | 0.73380093517590  |
| H | 5.69134005713342  | 8.56844891313931  | 0.90066432181482  |
| C | 4.28793377543603  | 7.20334994344207  | 1.81278625369999  |
| H | 3.26622374005717  | 6.80074312800659  | 1.65739826561270  |
| H | 4.31965468621516  | 7.63309628451637  | 2.83372746117425  |
| H | 4.99154918926267  | 6.34607200883181  | 1.77901457017439  |
| C | 4.56417964221152  | 7.63678627683738  | -0.67989948678670 |
| H | 4.84839858514684  | 8.37816454506753  | -1.45386258205729 |
| H | 3.53481128120160  | 7.28975875895555  | -0.90883092948838 |
| H | 5.23986317551895  | 6.76114612582711  | -0.77216087473961 |
| C | 4.26969956144104  | 13.25727078361018 | 1.41973524895086  |
| H | 3.53812365565731  | 13.94265166368996 | 1.89024845353264  |
| C | 5.50620698930092  | 13.20155340813203 | 2.32930030769079  |
| H | 6.34211417469107  | 12.64320005285550 | 1.85924839929986  |
| H | 5.27765056243080  | 12.71656415398412 | 3.29689290573500  |
| H | 5.87227676509751  | 14.22550558672021 | 2.54376561130418  |
| C | 4.62917491700889  | 13.84435266510965 | 0.03939259185682  |
| H | 5.35348625856506  | 13.19006216078254 | -0.48976608437572 |
| H | 5.08929899706657  | 14.84905614607703 | 0.14537434794109  |
| H | 3.73540222633439  | 13.94087751198738 | -0.60884460783767 |
| C | 3.02332010411454  | 13.43746979729353 | 4.67746554911075  |
| C | 3.13713403031594  | 14.75665832171041 | 4.19866215146184  |
| H | 2.43797786499007  | 15.12502550150671 | 3.43077563074934  |
| C | 4.13938500462103  | 15.60996638849534 | 4.69657750601130  |
| H | 4.21473894631826  | 16.64186399003072 | 4.31888710070853  |
| C | 5.05240880131267  | 15.15311531930484 | 5.66412821600262  |
| H | 5.83978076691036  | 15.82263572230477 | 6.04230535450387  |

|   |                   |                   |                   |
|---|-------------------|-------------------|-------------------|
| C | 4.96429167728449  | 13.83018723160502 | 6.13946240238789  |
| H | 5.68736803988090  | 13.45651382837211 | 6.88090690163036  |
| C | 3.94533739860155  | 12.99771695782109 | 5.65417069257017  |
| C | 5.29646808627239  | 10.48339059717525 | 5.66016449513236  |
| C | 5.40083102632661  | 9.98600176254463  | 4.34674023446725  |
| H | 4.51678231725940  | 10.01706396932611 | 3.69068947128004  |
| C | 6.61653905069608  | 9.45154196733652  | 3.90040993421457  |
| H | 6.69467661664485  | 9.05926795925563  | 2.87554244673692  |
| C | 7.72397485609484  | 9.39719019158209  | 4.76450769935252  |
| H | 8.67362179739895  | 8.96294103000018  | 4.41591796955278  |
| C | 7.61741961068754  | 9.88982896852797  | 6.07640424870052  |
| H | 8.48260728567449  | 9.84393740766385  | 6.75564588481520  |
| C | 6.40586317835979  | 10.43901797047274 | 6.52564677614225  |
| H | 6.31965734728134  | 10.82008408721389 | 7.55423838512271  |
| C | 3.64996890428500  | 11.19065287663283 | 7.94648318604126  |
| C | 3.29462169711478  | 12.32618624277508 | 8.70321068036950  |
| H | 3.16940189739274  | 13.29622145496911 | 8.20319448350538  |
| C | 3.10674641412576  | 12.22057775421333 | 10.09147884071895 |
| H | 2.83650951555899  | 13.11559810297022 | 10.67312220661472 |
| C | 3.27910411889921  | 10.98382724323116 | 10.73596745743635 |
| H | 3.13542033574146  | 10.90268864485609 | 11.82434530269724 |
| C | 3.64350760701833  | 9.85207260739326  | 9.98583518792711  |
| H | 3.79139200134857  | 8.88278836139437  | 10.48565289812013 |
| C | 3.82557089286109  | 9.94796092289964  | 8.59906418136718  |
| H | 4.10083349674235  | 9.05747621862068  | 8.01200611121886  |
| C | 1.00579389815939  | 8.78229088273650  | 7.92454901249979  |
| C | 0.22064522832817  | 9.68509784417448  | 9.86724917367467  |
| C | 0.66798565843089  | 8.41072139303555  | 10.15026210808125 |
| C | 0.07434639733984  | 11.10746467152963 | 7.81413234010329  |
| H | 0.54430846139431  | 11.10653214809843 | 6.81103303425047  |
| H | 0.45687951980602  | 11.97814829701770 | 8.37635510113463  |
| H | -1.02082715744633 | 11.19196244711330 | 7.70539849950861  |
| C | -0.35135518418849 | 10.73906460691695 | 10.74863381561621 |
| H | 0.31488820282224  | 11.62725784544499 | 10.78985653557678 |
| H | -0.47079112658175 | 10.35797439752452 | 11.77989730127275 |
| H | -1.34317400861597 | 11.08316217549602 | 10.39264256126256 |
| C | 0.69994542222386  | 7.64699083811220  | 11.42913511453346 |
| H | 0.14044756084435  | 6.69097415614230  | 11.35377020648635 |

H 0.24257017055876 8.24115947469838 12.24208413170706  
 H 1.73698332213379 7.39713502726792 11.73947045577822  
 C 1.68242320180406 6.54791220683138 8.82476953641339  
 H 2.13488639128266 6.43121694703347 7.82555043480871  
 H 0.88041431302991 5.79805202077336 8.96265820292382  
 H 2.46933849239783 6.38772360833002 9.58745860406774

## References

1. S. R. Bahr and P. Boudjouk, *J. Org. Chem.*, 1992, **57**, 5545-5547.
2. D. Raiser, H. Schubert, H. F. Bettinger and L. Wesemann, *Chem.-Eur. J.*, 2021, **27**, 1981-1983.
3. D. Raiser, C. P. Sindlinger, H. Schubert and L. Wesemann, *Angew. Chem., Int. Ed.*, 2020, **59**, 3151-3155.
4. N. Kuhn and T. Kratz, *Synthesis*, 1993, **1993**, 561-562.
5. I. Krossing, *Chem.-Eur. J.*, 2001, **7**, 490-502.
6. I. Krossing, H. Brands, R. Feuerhake and S. Koenig, *J. Fluorine Chem.*, 2001, **112**, 83-90.
7. C. Ganesamoorthy, S. Loerke, C. Gemel, P. Jerabek, M. Winter, G. Frenking and R. A. Fischer, *Chem. Commun.*, 2013, **49**, 2858-2860.
8. R. K. Harris, E. D. Becker, S. M. C. d. Menezes, R. Goodfellow and P. Granger, *Pure Appl. Chem.*, 2001, **73**, 1795-1818.
9. K. Eichele, WSolids1 ver. 1.21.7, 2021.
10. F. Neese, *Wiley Interdiscip. Rev. Comput. Mol. Sci.*, 2018, **8**, e1327.
11. F. Neese, *Wiley Interdiscip. Rev. Comput. Mol. Sci.*, 2012, **2**, 73-78.
12. F. Neese, *WIREs Comput Mol Sci.*, 2022, **12**, e1606.
13. A. D. Becke, *Phys. Rev. A*, 1988, **38**, 3098-3100.
14. J. P. Perdew and W. Yue, *Phys. Rev. B*, 1986, **33**, 8800-8802.
15. S. Grimme, S. Ehrlich and L. Goerigk, *J. Comput. Chem.*, 2011, **32**, 1456-1465.
16. F. Weigend, *Phys. Chem. Chem. Phys.*, 2006, **8**, 1057-1065.
17. F. Weigend and R. Ahlrichs, *Phys. Chem. Chem. Phys.*, 2005, **7**, 3297-3305.
18. B. Metz, H. Stoll and M. Dolg, *J. Chem. Phys.*, 2000, **113**, 2563-2569.
19. D. Andrae, U. Häussermann, M. Dolg, H. Stoll and H. Preuß, *Theoret. Chim. Acta*, 1990, **77**, 123-141.
20. G. A. Zhurko, CHEMCRAFT (<http://www.chemcraftprog.com>).
